# Supplementary material for: Study protocol for two complementary trials of non-steroidal or opioid analgesia use for children aged 6 to 17 years with musculoskeletal injuries (the No OUCH study)
Source: PubMed Central journal article supplement — BMJ Open. 2020 Jun 21;10(6):e035177. doi: 10.1136/bmjopen-2019-035177 (PMC7311068; doi:10.1136/bmjopen-2019-035177), 2020-06-21
Supplement: bmjopen-2019-035177.draft_revisions.pdf [file bmjopen-2019-035177.draft_revisions.pdf]

# BMJ Open

BMJ Open is committed to open peer review. As part of this commitment we make the peer review history of every article we publish publicly available.

When an article is published we post the peer reviewers' comments and the authors' responses online. We also post the versions of the paper that were used during peer review. These are the versions that the peer review comments apply to.

The versions of the paper that follow are the versions that were submitted during the peer review process. They are not the versions of record or the final published versions. They should not be cited or distributed as the published version of this manuscript.

BMJ Open is an open access journal and the full, final, typeset and author-corrected version of record of the manuscript is available on our site with no access controls, subscription charges or pay-per-view fees (<http://bmjopen.bmj.com>).

If you have any questions on BMJ Open's open peer review process please email [info.bmjopen@bmj.com](mailto:info.bmjopen@bmj.com)

# BMJ Open

## A study protocol for two complementary trials of non-steroidal or opioid analgesia use for children aged 6 to 17 years with musculoskeletal injuries (The No OUCH Study)

|                               |                                                                                                                                                                                                                                                                                                                                                                                                                                                                                                                                                                                                                                                                                                                                                                                                                                                                                                                                                                                                                                                                                                                                                                                                                                                                |
|-------------------------------|----------------------------------------------------------------------------------------------------------------------------------------------------------------------------------------------------------------------------------------------------------------------------------------------------------------------------------------------------------------------------------------------------------------------------------------------------------------------------------------------------------------------------------------------------------------------------------------------------------------------------------------------------------------------------------------------------------------------------------------------------------------------------------------------------------------------------------------------------------------------------------------------------------------------------------------------------------------------------------------------------------------------------------------------------------------------------------------------------------------------------------------------------------------------------------------------------------------------------------------------------------------|
| Journal:                      | <i>BMJ Open</i>                                                                                                                                                                                                                                                                                                                                                                                                                                                                                                                                                                                                                                                                                                                                                                                                                                                                                                                                                                                                                                                                                                                                                                                                                                                |
| Manuscript ID                 | bmjopen-2019-035177                                                                                                                                                                                                                                                                                                                                                                                                                                                                                                                                                                                                                                                                                                                                                                                                                                                                                                                                                                                                                                                                                                                                                                                                                                            |
| Article Type:                 | Protocol                                                                                                                                                                                                                                                                                                                                                                                                                                                                                                                                                                                                                                                                                                                                                                                                                                                                                                                                                                                                                                                                                                                                                                                                                                                       |
| Date Submitted by the Author: | 21-Oct-2019                                                                                                                                                                                                                                                                                                                                                                                                                                                                                                                                                                                                                                                                                                                                                                                                                                                                                                                                                                                                                                                                                                                                                                                                                                                    |
| Complete List of Authors:     | <p>Ali, Samina; University of Alberta, Pediatrics<br/> Rajagopal, Manasi; University of Alberta, Pediatrics<br/> Klassen, Terry; University of Manitoba, Children's Hospital Research Institute of Manitoba<br/> Richer, Lawrence; University of Alberta, Pediatrics<br/> McCabe, Christopher; University of Alberta, Department of Emergency Medicine Reserach<br/> Willan, Andy; University of Toronto<br/> Yaskina, Maryna; University of Alberta<br/> Heath, Anna; SickKids,<br/> Drendel, Amy; Medical College of Wisconsin, paediatrics and Emergency Medicine<br/> Offringa, Martin; The Hospital for Sick Children, Child Health Evaluation Sciences<br/> Gouin, Serge; CHU Ste.Justine, Emergency<br/> Stang, Antonia; University of Calgary, Pediatrics; Alberta Children's Hospital, Pediatrics<br/> Sawyer, Scott; University of Manitoba, Pediatrics and Emergency Medicine<br/> Bhatt, Maala; University of Ottawa, Pediatrics; Children's Hospital of Eastern Ontario, Emergency Medicine<br/> Hickes, Serena; University of Manitoba Children's Hospital Research Institute of Manitoba, Parent Partner<br/> Poonai, Naveen; Schulich School of Medicine &amp; Dentistry, London Health Sciences Centre, Paediatrics and Internal Medicine</p> |
| Keywords:                     | Pain management < ANAESTHETICS, Paediatric orthopaedics < ORTHOPAEDIC & TRAUMA SURGERY, ACCIDENT & EMERGENCY MEDICINE                                                                                                                                                                                                                                                                                                                                                                                                                                                                                                                                                                                                                                                                                                                                                                                                                                                                                                                                                                                                                                                                                                                                          |
|                               |                                                                                                                                                                                                                                                                                                                                                                                                                                                                                                                                                                                                                                                                                                                                                                                                                                                                                                                                                                                                                                                                                                                                                                                                                                                                |

SCHOLARONE™  
Manuscripts

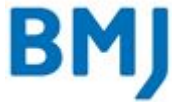

I, the Submitting Author has the right to grant and does grant on behalf of all authors of the Work (as defined in the below author licence), an exclusive licence and/or a non-exclusive licence for contributions from authors who are: i) UK Crown employees; ii) where BMJ has agreed a CC-BY licence shall apply, and/or iii) in accordance with the terms applicable for US Federal Government officers or employees acting as part of their official duties; on a worldwide, perpetual, irrevocable, royalty-free basis to BMJ Publishing Group Ltd ("BMJ") its licensees and where the relevant Journal is co-owned by BMJ to the co-owners of the Journal, to publish the Work in this journal and any other BMJ products and to exploit all rights, as set out in our [licence](#).

The Submitting Author accepts and understands that any supply made under these terms is made by BMJ to the Submitting Author unless you are acting as an employee on behalf of your employer or a postgraduate student of an affiliated institution which is paying any applicable article publishing charge ("APC") for Open Access articles. Where the Submitting Author wishes to make the Work available on an Open Access basis (and intends to pay the relevant APC), the terms of reuse of such Open Access shall be governed by a Creative Commons licence – details of these licences and which [Creative Commons](#) licence will apply to this Work are set out in our licence referred to above.

Other than as permitted in any relevant BMJ Author's Self Archiving Policies, I confirm this Work has not been accepted for publication elsewhere, is not being considered for publication elsewhere and does not duplicate material already published. I confirm all authors consent to publication of this Work and authorise the granting of this licence.

**Title:** A study protocol for two complementary trials of non-steroidal or opioid analgesia use for children aged 6 to 17 years with musculoskeletal injuries (The No OUCH Study)

**Lay Title:** Analgesia Use for Children with Musculoskeletal Injuries

**Proposed Authorship:** Samina Ali<sup>1,2,\*</sup>, Manasi Rajagopal<sup>1</sup>, Terry P. Klassen<sup>3,4</sup>, Lawrence Richer<sup>1,2</sup>, Christopher McCabe<sup>5,6</sup>, Andrew R. Willan<sup>7,8</sup>, Maryna Yaskina<sup>2</sup>, Anna Heath<sup>9</sup>, Amy L. Drendel<sup>10</sup>, Martin Offringa<sup>11</sup>, Serge Gouin<sup>12</sup>, Antonia S. Stang<sup>13</sup>, Scott Sawyer<sup>14</sup>, Maala Bhatt<sup>15</sup>, Serena Hickes<sup>4</sup> and Naveen Poonai<sup>16,17</sup>, on behalf of the KidsCAN PERC Innovative Pediatric Clinical Trials No OUCH Study Team

1 Department of Pediatrics, Faculty of Medicine & Dentistry, University of Alberta, Edmonton, Alberta, Canada

2 Women & Children's Health Research Institute, Edmonton, Alberta, Canada

3 Max Rady College of Medicine, Pediatrics and Child Health, Rady Faculty of Health Sciences, University of Manitoba, Winnipeg, Manitoba, Canada

4 Children's Hospital Research Institute of Manitoba, Winnipeg, Manitoba, Canada

5 Department of Emergency Medicine, University of Alberta, Edmonton, Alberta, Canada

6 Institute of Health Economics, Edmonton, Alberta, Canada

7 Ontario Child Health Support Unit, Research Institute, Hospital for Sick Children, Toronto, Ontario, Canada

8 Dalla Lana School of Public Health, University of Toronto, Toronto, Ontario, Canada

9 The Hospital for Sick Children, Toronto, Ontario, Canada

10 Department of Pediatrics, Medical College of Wisconsin, Milwaukee, Wisconsin, USA

11 Child Health Evaluative Sciences, The Hospital for Sick Children, Toronto, Ontario

12 Departments of Pediatric Emergency Medicine & Pediatrics, CHU Ste-Justine, Université de Montréal, Montréal, Quebec, Canada

13 Department of Pediatrics, University of Calgary, Calgary, Alberta, Canada

14 Departments of Pediatrics and Emergency Medicine, Health Sciences Center, Winnipeg Children's Hospital, University of Manitoba, Winnipeg, Manitoba, Canada

15 Department of Pediatrics, University of Ottawa, Ottawa, Ontario, Canada

16 Department of Pediatrics & Internal Medicine, Schulich School of Medicine and Dentistry, London, Ontario, Canada

17 Children's Health Research Institute, London Health Sciences Centre, London, Ontario, Canada

\*denotes corresponding author, and contact for public and scientific inquiries

3-583 Edmonton Clinic Health Academy

11405 – 87 Avenue

Edmonton, AB T6G 1C9

Phone: (780) 248-5574

Fax: (888) 775-8876

Email: [sali@ualberta.ca](mailto:sali@ualberta.ca)

1  
2  
3  
4 Keywords: pain, analgesia, fracture, musculoskeletal injury, pediatrics, emergency  
5 medicine, opioid  
6

7  
8 Trial Protocol Version 22/08/2019  
9 Trial Registration: clinicaltrials.gov NCT03767933  
10 WHO Trial Registration Data Set: See Table 1  
11

12 Word Count: 3995/ 4000 words  
13  
14  
15  
16  
17  
18  
19  
20  
21  
22  
23  
24  
25  
26  
27  
28  
29  
30  
31  
32  
33  
34  
35  
36  
37  
38  
39  
40  
41  
42  
43  
44  
45  
46  
47  
48  
49  
50  
51  
52  
53  
54  
55  
56  
57  
58  
59  
60

For peer review only

## Author Contributions

Dr. Samina Ali (SA) developed and revised the protocol, co-drafted the protocol paper, and will operationalize the study. She chose the previously validated tools for measuring the primary and secondary efficacy outcomes (vNRS, VAS and FPS-R).

Manasi Rajagopal (MR) is the national study coordinator who contributed to study design, co-drafted the protocol paper and will operationalize the study.

Dr. Lawrence Richer (LR) and Dr. Christopher McCabe (CM) co-developed the novel study methodology and contributed to protocol revision

Dr. Andrew R. Willan (AW), Dr. Maryna Yaskina (MY), and Dr. Anna Heath (AH) led the statistical analysis planning and contributed to protocol revision.

Dr. Amy L. Drendel (ALD) is a fracture outcomes expert who contributed to determining the secondary outcomes for the study; she contributed to methodology and revised the protocol.

Dr. Serge Gouin (SG), Dr. Antonia Stang (AS), Dr. Scott Sawyer (DB), and Dr. Maala Bhatt (MB), as site leads for this study, reviewed and revised the protocol, with special input into the Methods section of the study.

Serena Hickes (SH) is a family representative who reviewed and provided input into the study protocol. She provided lived experience in patient-oriented outcomes.

Dr. Naveen Poonai (NP), Dr. Martin Offringa (MA), and Dr. Terry Klassen (TK) co-developed the methodology and revised the protocol.

All authors have approved this final version of the protocol. None of the authors have financial or other conflicts of interests as they pertain to this study and its involved recruitment sites.

## ABSTRACT

**Introduction.** Musculoskeletal (MSK) injuries are a frequent cause for emergency department (ED) visits in children. MSK injuries are associated with moderate to severe pain in most children, yet recent research confirms that the management of children's pain in the ED remains inadequate. Clinicians are seeking better oral analgesic options for MSK injury pain with demonstrated efficacy and an excellent safety profile. This study aims to determine the efficacy and safety of adding oral acetaminophen or oral hydromorphone to oral ibuprofen and interpret this information within the context of parent/caregiver preference.

**Methods and analysis.** Using a novel preference-informed complementary trial design, two simultaneous trials are being conducted. Parents/caregivers of children presenting to the ED with acute limb injury will be approached and decide which trial they wish to participate in: an opioid-inclusive trial or a non-opioid trial. Both trials will follow randomized, double-blind, placebo-controlled, superiority-trial methodology and will enroll a minimum of 536 children across six Canadian pediatric EDs. Children will be eligible if they are 6 to 17 years of age and present to the ED with an acute limb injury and a self-reported verbal Numerical Rating Scale pain score  $\geq 5$ . The primary objective is to determine the effectiveness of oral ibuprofen + oral hydromorphone versus oral ibuprofen + oral acetaminophen versus oral ibuprofen alone. Recruitment launched in April 2019.

**Ethics and dissemination.** This study has been approved by the Health Research Ethics Board (University of Alberta), and by appropriate ethics boards at all recruiting centers. Informed consent will be obtained from parents/guardians of all participants, in conjunction with assent from the participants themselves. Study data will be submitted for publication regardless of results. This study is funded through a Canadian Institutes of Health Research grant.

**Trial registration number:** NCT03767933, First registered December 05, 2018

**Words:** 295/ 300

## Article Summary

### Strengths and limitations of this study

1. Comparing the efficacy of adding oral acetaminophen or oral hydromorphone to oral ibuprofen for children's musculoskeletal injury, this study may lead to improved pediatric pain management in the emergency department.
2. This study employs a novel design involving two complementary, randomized controlled trials that will be run simultaneously.
3. Participating families will choose in which trial they wish to participate, thus engaging and empowering them as a key participant in healthcare research decision-making.
4. Given the current negative public opinion regarding opioids, we expect that some parents/caregivers will be hesitant to accept opioids thus leading to an imbalance in the pace of recruitment between the two trials.
5. Given the sample size, this study will not be able to provide definitive evidence regarding rare but serious adverse events.



## BACKGROUND AND RATIONALE

Musculoskeletal (MSK) injuries are very common and are associated with moderate to severe pain for most children. [1, 2] Despite three decades of pain research in this area, recent evidence confirms that pediatric pain management in the emergency department (ED) is still suboptimal. [3-5] Previous studies have demonstrated that only 35% of children presenting to a pediatric ED with fractures or severe sprains received *any* analgesic. [6, 7] Further, a medical record review of two Canadian EDs showed unacceptably long delays in provision of initial analgesia, with children waiting a mean of 118 minutes to the provision of first analgesia. [6]

The American Academy of Pediatrics recommends acetaminophen, ibuprofen and opioids as the top three medication choices for the treatment of acute pain in children. [8] These are also the top three most commonly used ED for children with MSK injury. [3, 4, 6, 9, 10] However, there has recently been a concerted movement to limit opioid use in children, due, in large part, to the current Opioid Crisis.[11, 12] Clinicians are increasingly less likely to prescribe oral opioids to young children, and caregivers are increasingly less willing to administer them. [5] Coupled with the Opioid Crisis, the fear of adverse events, particularly respiratory depression and deep sedation, are another important reason to explain the reluctance of ED physicians to prescribe an opioid to children with moderate to severe pain. [13]

Clinicians are currently seeking optimal (and for many, non-opioid) oral analgesic options with the best efficacy and safety profile. It is known that the under-treatment of children's pain is partly due to a lack of evidence to support clinician decision-making in choosing the most effective medication. [4, 14] LeMay et al's recently published systematic review of MSK injury pain management concluded that an optimal analgesic agent or combination could not be identified at this time. [15] Very few pediatric studies of analgesic combination therapy for MSK injury exist, and extrapolation from adult data can be misleading, both in establishing the correct dose and in assessing child-specific pain reduction. [15-18] Previous research has demonstrated that a combination of oral morphine with ibuprofen was no more effective and was less safe than oral ibuprofen alone for children's suspected fracture pain. [16] Similarly, oxycodone was no more effective and was less safe than ibuprofen for post-discharge fracture pain. [19] There is some emerging work from non-ED settings to suggest that oral hydromorphone may be an effective alternative to oral morphine and oxycodone. [20, 21] Oral hydromorphone is a long-acting opioid analgesic with a duration of analgesic action of up to 4 hours and is more potent than oral morphine, but with fewer side effects. [22] Both oral hydromorphone and ibuprofen's peak analgesic action occurs at 60 minutes post administration.

The proposed study aims to determine if acetaminophen or hydromorphone, when added to ibuprofen, offers more clinical pain relief than ibuprofen alone, for children with an acute MSK injury. Further, it will determine if the combination of hydromorphone and ibuprofen is more clinically effective than the combination of acetaminophen with ibuprofen. This study, which will consist of two clinical trials, will inform health-care decisions by providing evidence for the effectiveness and safety of commonly prescribed

analgesic agents, and compare them to the most commonly used monotherapy, ibuprofen. [3, 6]

## **METHODS AND ANALYSIS**

This study will be conducted with a novel preference-informed complementary trial design and is comprised of two simultaneous ‘parallel’ trials. Eligible parent/caregiver-child pairs will decide which trial they wish to participate in: a three-armed opioid-inclusive trial (the Opioid trial) or a two-armed non-opioid trial (the Non-Opioid trial). Once the family has chosen their preferred trial, conduct within each trial will follow traditional randomized, double-blind, parallel assignment, placebo-controlled superiority trial methodology. Study endpoints will be identical for both trials within this study. The study protocol is reported using the SPIRIT-PRO reporting guidelines. [23] (See Table 1 for study summary.)

### **Study Setting**

This study will be conducted in six pediatric EDs across Canada: 1. Stollery Children’s Hospital (Edmonton, Alberta) which will serve as the coordinating site, 2. Alberta Children’s Hospital (Calgary, Alberta), 3. Winnipeg Children’s Hospital (Winnipeg, Manitoba), 4. Children’s Hospital at London Health Sciences Centre (London, Ontario), 5. CHEO (Ottawa, Ontario), and 6. Centre Hospitalier Universitaire Ste-Justine (Montreal, Quebec). The ED census for recruiting centers ranges from 30,000 to 80,000 patient visits per year. Study recruitment began on April 20, 2019 and is expected to be completed within 18 months.

### **Eligibility and Exclusion Criteria**

Children will be eligible if they are 6 to 17 years of age, presenting to the ED with an acute limb injury (<24 hours old) that is neither obviously deformed nor having neurovascular compromise, and have a self-reported verbal Numerical Rating Scale pain score  $\geq 5$  at triage. This age group was chosen as fracture rarely occur under this age, and a consistent and validated pain measurement tool can be employed across this age category.

Children will be excluded if they meet any of the following criteria: (a) require immediate intravenous or intranasal pain medications (b) have known hypersensitivity to study medications, (c) receive acetaminophen or NSAID within three hours prior to recruitment, (d) receive opioids within one hour prior to recruitment, (e) parent/caregiver or child cognitive impairment precluding the ability to self-report pain or respond to study questions, (f) injury suspected to be due to non-accidental trauma or child abuse, (g) suspected multi-limb fracture, (h) chronic pain that necessitates daily analgesic use, (i) known hepatic or renal disease/dysfunction, (j) known bleeding disorder, (k) known pregnancy, (l) vomiting that precludes the ability to take oral medications, (m) parent/caregiver and/or child inability to communicate fluently in English or French in the absence of a native language interpreter, (n) parent/caregiver unavailable for follow-up, or (o) previous enrolment in this study.

### **Study Interventions and Rescue Medications**

1  
2  
3 If a family chooses the **Opioid** trial, their child will be randomized to one of three  
4 treatment arms: (a) oral ibuprofen (10mg/kg, maximum 600mg) + acetaminophen  
5 placebo + hydromorphone placebo, OR  
6 (b) oral ibuprofen (10mg/kg, maximum 600mg) + oral acetaminophen (15mg/kg,  
7 maximum 1000mg) + hydromorphone placebo, OR  
8 (c) oral ibuprofen (10mg/kg, maximum 600mg) + acetaminophen placebo + oral  
9 hydromorphone (0.05mg/kg, maximum 5 mg).  
10  
11

12 If a family chooses the **Non-Opioid** trial, their child will be randomized to one of two  
13 treatment arms: (a) oral ibuprofen (10mg/kg, maximum 600mg) + acetaminophen  
14 placebo, OR  
15 (b) oral ibuprofen (10mg/kg, maximum 600mg) + oral acetaminophen (15mg/kg,  
16 maximum 1000mg).  
17  
18

19 Given the consistent recommendations that ibuprofen be the first-line therapy for acute  
20 MSK injury pain, [15, 24-26] and the fact that it is the medication of choice for triage-  
21 initiated pain protocols at most Canadian pediatric EDs, [27] ibuprofen will serve as the  
22 comparator (standard of care) for both trials.  
23  
24

25 All study medications and placebos will be administered as a single oral dose in liquid  
26 form. No other medications will be administered as part of the study. However, enrolled  
27 patients will be eligible to receive additional analgesia at any time if requested by the  
28 child or family and/or deemed necessary by the clinical team. The treating physician will  
29 order rescue analgesia at their discretion. Any such co-interventions, including other non-  
30 pharmacologic interventions (e.g. ice, splinting) will be documented.  
31  
32

### 33 **Randomization, Allocation Concealment, and Blinding**

34 Randomization will be determined using a secure online centralized randomization tool  
35 hosted by the Women and Children's Health Research Institute (WCHRI, University of  
36 Alberta). [28] Participants will be allocated via a kit number. A statistician will oversee  
37 the generation of a randomized listing of the treatment by kit number using a 1:1:1  
38 allocation scheme for the Opioid trial, and a 1:1 allocation scheme for the Non-Opioid  
39 trial. This will be further stratified by center using block-randomization with variable  
40 block sizes. These randomization lists, which will be sent directly by the statistician to  
41 the participating site's research pharmacy team, will be used by each participating site's  
42 research pharmacy to create pre-packaged, sequential study kits for each trial. Research  
43 nurses will then allocate the kits to enrolled participants in sequential fashion.  
44  
45  
46

47 Study participants, research nurses (the outcome assessors), ED staff, and data analysts  
48 will all be blinded with respect to the intervention. In the rare occurrence where a treating  
49 physician needs to know what the child has received, the study blind can be broken by  
50 the clinical team for patient safety. The protocol for unblinding, if there is a risk to the  
51 participant whereby knowledge of the treatment arm will affect clinical decision-making,  
52 will involve the research nurse logging in to a secure web-based unblinding system with  
53 REDCap. However, only the treating physician will 'click' on the button to reveal the  
54  
55  
56  
57  
58  
59

study medications administered. Thus, parents/caregivers, children and research staff will remain blinded.

### Recruitment and Data Collection

The patient's initial assessment upon arrival to the ED will be performed by a triage nurse. Triage nurses, research nurses, or their designate will identify potentially eligible participants. Research nurses will be present in enrolling EDs up to 16 hours a day to screen children and assess eligibility based on the inclusion and exclusion criteria outlined above. Research nurses will follow site-specific Research Ethics Board (REB) guidelines regarding approaching families for research studies. Verbal consent for screening will be obtained from families and documented. For eligible parent/caregiver-child pairs who express interest in study participation, an ED physician will confirm eligibility, and the research nurse or designate will complete consent and assent, as appropriate (Appendix 1).

After obtaining written informed consent from the parent/caregiver, and assent from the child where appropriate, the research nurse will determine the family's preference for study trial (ie. Opioid or Non-Opioid). If the family does not voice a preference, they will be enrolled in the Opioid trial as it contains all three possible medication combinations offered in the study. The research nurse will administer the study medications according to the randomization scheme for that chosen trial (Figure 1). If a participant vomits within 30 minutes of drug administration, it will be repeated once in accordance with current clinical and research practice. [29] The parent/caregiver will be asked to complete a brief survey in the ED to explore their reasons for choosing their study trial (see Appendix 2 for case report form).

Following study drug administration, the research nurse will monitor the participant for up to 120 minutes, with safety and efficacy measures recorded at the time of recruitment (T-R), time of study drug administration (T-0), at 30 minutes, 60 minutes, 90 minutes and 120 minutes post-study drug administration (T-30, T-60, T-90, T-120 respectively), at the time of medical examination (T-ME) and as soon as possible following x-ray (T-XR). All study measures at T-30, T-60, T-90, and T-120 will be collected within 15 minutes of the designated time point (i.e.  $\pm 15$  minutes). All study measures for T-ME and T-XR will be collected within 30 minutes of the designated time point. If a patient is discharged prior to T-120, the study measures will be recorded one last time at the time of discharge.

Pain scores will be measured on the verbal Numerical Rating Scale (vNRS), Visual Analog Scale (VAS), and Faces Pain Scale-Revised (FPS-R) at each study time point. [30, 31] In addition, the research nurse will also evaluate the presence of adverse events (e.g. nausea, vomiting), record vital signs (pulse, blood pressure, respiratory rate, oxygen saturation) and evaluate sedation level using the Ramsay Sedation Scale (RSS). [32] Reporting of adverse events will be in keeping with Health Canada regulations and REB guidelines. Prior to their discharge from the ED, both the child and parent/caregiver will be asked to rate acceptability of the study medication received during the trial using a Likert scale. (Figure 2)

Two brief 10-minute follow-up surveys will be completed with the parent/caregiver following their child's discharge from the ED. Parents/caregivers will have the option of completing these over the phone or online via a secure email link. Non-responders to email contact and those who prefer phone follow-up will be called 3-5 times depending on local REB requirements. The first follow-up survey, conducted at 1-3 days post ED discharge, will determine the occurrence of any adverse events since discharge. The second follow-up survey will be completed at 1-2 weeks post ED discharge, to determine parent/caregiver comfort and satisfaction with at-home pain management and the extent of functional limitations for their child.

To achieve adequate participant enrolment to reach target sample size, we will monitor the monthly recruitment targets and have regular (every 4-8 week) team meetings to allow for timely implementation of procedural changes. There are no plans for patient follow-up beyond the two-week study period, given that only one dose of study medications will be administered. All study scripts and data collection tools will be available in English and French.

### Outcome Measures

The Primary Efficacy Outcome will be the self-reported vNRS pain score at 60 minutes post study drug administration. The vNRS, ranging from 0 (no pain) to 10 (worst pain imaginable), is the most commonly used, responsive pain measurement tool for the study age group. [33] It has been successfully employed in several children's pain studies, [34, 35] and is validated for the age range of children included in this study. [36] The 60-minute primary outcome time point reflects the peak plasma concentration and clinical action of both oral hydromorphone and ibuprofen. [22, 37-39]

The Principal Safety Endpoint will be the proportion of children with adverse events related to study drug administration. Medication safety profiles influence parent/caregiver and patient willingness to adhere to medication regimens. [40] It has also been previously established that more safety data is urgently needed to inform clinical decision-making when using the study medications of interest. [24]

The Secondary Outcomes will include efficacy, safety and preference endpoints:

#### Secondary Efficacy Outcomes

1. A vNRS pain score <3 at T-60
2. A vNRS pain score reduction of at least 2 points out of 10 at T-60
3. Pain scores at study time-points (T-30, T-60, T-90, T-120, T-ME and T-XR).
4. ED length of stay
5. Missed fractures or dislocations
6. Rescue analgesic in the 60 minutes following administration of study medication
7. Time to effective analgesia, defined as the first vNRS pain score <3 post-intervention
8. Children's self-reported pain intensity on the VAS and the FPS-R at all study time-points

#### Secondary Safety Outcomes

1. Any serious adverse events during the study period, including apnea, cardiac arrest, or death
2. A Ramsay Sedation Score between 1 to 3
3. Each specific adverse event type (e.g., nausea, dizziness, itchiness) during the study period

### Secondary Preference Outcomes

1. Parent/caregiver reasons for choosing the opioid or the non-opioid trial
2. Self-reported parent/caregiver and child satisfaction with pain relief and acceptability of study medications, using a previously employed 5-point Likert scale [41]
3. Physicians' in-ED preference of analgesics for the patient
4. Parent/caregiver comfort treating their child at home, as measured by a scale created by the study team [5]

### Sample Size

The sample size for the three-armed opioid trial is 105 patients per arm, for a total of 315. The sample size for the two-armed non-opioid trial is 85 patients per arm, for a total of 170. Thus, the total for the No OUCH Study would be 485. To account for missing data for the primary outcome due to early withdrawal, the study will over-recruit by approximately 10%, for a target recruitment of approximately 540 patients. This sample size was determined based on a two-sided level of 0.05, a power of 0.95, a minimally clinically important difference (MCID) of 1.5 on the vNRS, an estimate of the standard deviation (SD) of the difference of 2.7, [42] and a Bonferroni correction to adjust for the three treatment comparisons. Based on previously conducted survey work, [43] an imbalance in recruitment pace between the opioid and non-opioid trials is expected. However, both trials will continue to recruit until the sample size is met for both. One trial will over-recruit to allow for completion of the other, without compromising the key preference-based study design. To ensure timely completion of the No-OUCH Study, we will monitor the recruitment rates and potentially update the randomization strategy if there is an extreme over-recruitment for one of the trials.

### Statistical Methods

All analyses will adhere to the principle of intention-to-treat. There will be three treatment comparisons: (1) ibuprofen versus ibuprofen plus acetaminophen; (2) ibuprofen versus ibuprofen plus hydromorphone; (3) ibuprofen plus acetaminophen versus ibuprofen plus hydromorphone. Due to homogeneity in the trial end-points for the two complementary trials, we will consider a joint analysis across both the endpoints if the two patient populations are sufficiently similar. This will be determined using previously specified decision rules.

For each treatment comparison, the primary analysis will compare the mean vNRS reduction for pain scores at T-60. This comparison will be facilitated using a linear mixed model with the T-0 measure on the vNRS for pain as a covariate and a site-specific effect. We will consider whether the two trials can be analysed together used nested linear mixed models with and without a trial by treatment interaction term. If this interaction term is not significant then a single treatment effect will be estimated for each

1  
2  
3 comparison. A two-sided level of 0.05 will be used to declare significance. A Bonferroni  
4 -Holm correction will be used to adjust for the three treatment comparisons. The  
5 proportion of children with a self-reported of vNRS of less than 3 at 60 minutes, the  
6 proportion who require a rescue analgesic by 60 minutes and the proportion who  
7 experienced adverse events related to study drug administration will be analyzed using a  
8 Mantel Haenszel chi-squared test, stratified by site. All other outcomes will be  
9 summarised using appropriate descriptive statistics.  
10  
11

12 There will be no interim analyses of the efficacy endpoints, as it is very difficult to  
13 change practice based on the results from small samples, regardless of the p-value. The  
14 Data Safety Monitoring Board (DSMB) will be provided with a masked comparison  
15 between treatment groups with respect to the safety endpoints at the intervals of their  
16 choosing. The decision to stop the trial for safety reasons will be left to the discretion of  
17 the DSMB (See Appendix 3 for DSMB Charter). Interim analyses will also monitor the  
18 relative recruitment rate of the two trials. If insufficient participants are enrolled on either  
19 of the No OUCH trials, appropriate action will be taken to ensure sufficient power to  
20 conclude following the completion of the trials. Further information is available in the  
21 Statistical Analysis Plan, which will be published separately.  
22  
23  
24

### 25 **Health Economic Methods**

26 The trial will also examine the relative cost-effectiveness of each of the medication  
27 options. The economic evaluation will take a healthcare perspective for the reference  
28 case, in line with CADTH guidance [44] and in secondary analyses will consider societal  
29 costs. Information will be collected on interventions during ED visit, in hospital  
30 medication costs, and follow up care from other health services, as well as on costs  
31 incurred by families in interacting with health services. Quality of life will be measured  
32 by asking parents/caregivers to report their child's quality of life using a 10-point  
33 numeric scale. The health economic analysis will estimate the expected cost per  
34 incremental change in quality of life and will use nonparametric bootstrapping methods  
35 to calculate uncertainty to assist in decision making about the value of providing different  
36 treatment strategies.  
37  
38  
39

### 40 **Patient and Public Involvement**

41 The team's patient engagement partner (SH) has provided ongoing input on the study  
42 protocol and data collection tools. The study team was also supported by parent advisory  
43 groups at the ECHO (Evidence in Child Health to Enhance Outcomes) Research Program  
44 (Edmonton, Alberta) and TREKK (Translating Emergency Knowledge for Kids)  
45 (Winnipeg, Manitoba). Parent advisors reviewed and provided feedback on the wording,  
46 readability, sensitivity, flow and content of parent/caregiver surveys. Following  
47 recruitment completion, parent advisors will be engaged in focus groups to discuss study  
48 results and dissemination plans in the context of family-centered care.  
49  
50

### 51 **Data Management**

52 Data management services will be provided by the WCHRI data coordinating centre.  
53 Study data will be entered and managed using REDCap (Research Electronic Data  
54 Capture) tools hosted and supported by WCHRI.[45] WCHRI's REDCap installation is a  
55  
56  
57  
58  
59

1  
2  
3 validated electronic, web-based data capture system housed in a secure data center at the  
4 University of Alberta.  
5

6  
7 Data will be entered directly into the study database or, in case of technical failure, it may  
8 be collected on paper and then digitally recorded in REDCap. Selected data elements will  
9 be validated electronically on an ongoing basis throughout the study and any  
10 discrepancies will be assigned to members of the study team for resolution. REDCap  
11 includes internal quality checks, such as automatic range checks, to identify data that  
12 appear inconsistent, incomplete, or inaccurate (see Appendix 4 for data management  
13 plan).  
14

15  
16 Only limited identifiable data will be stored in REDCap (e.g. email address) for the  
17 purposes of completing follow-up surveys. Study participants' contact information will  
18 be stored securely at each clinical site for internal use during the study. Paper records  
19 (e.g., signed consent and assent forms) will be stored in a secure locked cabinet at each  
20 site, with limited access by the research team only. At the end of the study, all records  
21 will continue to be kept in a secure location for as long a period as dictated by the  
22 reviewing IRB, institutional policies, or sponsor requirements.  
23

### 24 25 **Monitoring**

26 Monitoring for quality and regulatory compliance will be performed by the University of  
27 Alberta's Quality Management in Clinical Research (QMCR) office. QMCR is an  
28 independent unit housed within the university's central administration that provides arms-  
29 length review of all University of Alberta sponsored trials, at least three times per year.  
30 Details of clinical site monitoring will be documented in a Clinical Monitoring Plan.  
31

32  
33 Safety oversight will be under the direction of a DSMB which will function  
34 independently of the investigators. This committee will be chaired by Dr. Garth Meckler  
35 (Division Head, BC Children's Hospital, Vancouver, British Columbia), and is composed  
36 of 5 individuals with expertise in trial methodology, epidemiology, biostatistics, and  
37 pediatric emergency medicine. The DSMB will meet at least semi-annually to assess  
38 safety and efficacy data and will operate under the rules of an approved charter/ terms of  
39 reference.  
40  
41

### 42 **ETHICS AND DISSEMINATION**

43 Based on previously conducted research with oral opioids, [16, 24, 46] nausea, mild  
44 dizziness, and drowsiness are expected to be possible non-serious adverse events in this  
45 study. There is a small potential risk of respiratory depression following the  
46 administration of any opioid, although the risk is notably greater with repeat dosing and  
47 intravenous administration. This risk will be minimized by using only a single oral dose  
48 and vigilantly monitoring the participant's vital signs and level of sedation during the  
49 study period, which extends for one hour past the peak action point of the drugs.  
50  
51

52  
53 This study will be federally monitored by Health Canada, and approval has been granted  
54 for the conduct of this study (HC6-24-c220455). The Health Research Ethics Board  
55 Biomedical Panel at the University of Alberta has further approved this study  
56  
57  
58



(Pro00073476). The five other participating centers acquired ethics approval from their local IRBs prior to commencing recruitment. Any protocol amendments will be submitted for Health Canada review and IRB approvals prior to implementation and will be added as an amendment to the clinicaltrials.gov registration. Institutional approvals from each participating pediatric ED will be obtained prior to beginning recruitment.

Public opinion regarding opioids is notably negative at this time, thus there is a hesitancy to accept opioids, even when they are felt to be clinically indicated. As such, it is expected that some parents/caregivers will be hesitant to accept opioids. [47-49] However, the study will leverage this opportunity to *understand* parent/caregiver perspectives and rationale for their decision-making. This valuable information can then inform knowledge translation of study results, educational initiatives and responsive healthcare provider prescribing of analgesia.

The study team plans to publish this trial in a high-impact, peer-reviewed journal and present the results at national and international meetings; authorship eligibility will be determined by employing the International Committee of Medical Journal Editors' recommended guidelines. [50] Statistical code and dataset can be made available upon request.

**Funding Statement** This work is supported by an Innovative Clinical Trials Multi-year Grant from the Canadian Institutes of Health Research (funding reference number MYG-151207; 2017 – 2020), as part of the Strategy for Patient-Oriented Research and the Children's Hospital Research Institute of Manitoba(Winnipeg, Manitoba), the Centre Hospitalier Universitaire Sainte-Justine (Montreal, Quebec), the Department of Pediatrics, University of Western Ontario (London, Ontario), the Alberta Children's Hospital Research Institute (Calgary, Alberta), the Women and Children's Health Research Institute (Edmonton, Alberta), the Children's Hospital of Eastern Ontario Research Institute Inc. (Ottawa, Ontario), and the Hospital for Sick Children Research Institute (Toronto, Ontario). This study is sponsored by The Governors of the University of Alberta (Suite 400, 8215 – 112 Street, Edmonton, Alberta, Canada T6G 2C8). Neither the study sponsor nor funders have any role in the collection, management, analysis, or interpretation of data; writing of the report; or the decision to submit the report for publication.

**Competing Interests** None declared.

**Patient Consent** After assessing child eligibility based on the outlined inclusion/exclusion criteria, research nurses will obtain parent/caregiver consent (and assent for children 7 years and older) prior to recruitment of each patient. The research nurse will provide the parent/caregiver and child with both a verbal and written explanation of the study and an opportunity to review the information and consent/assent forms privately. They will then return shortly afterwards to answer any questions the family might have and obtain written consent and assent.

1  
2  
3 **Acknowledgments** The authors would like to acknowledge the iPCT SPOR team and our  
4 parent advisors, who provided valuable input on the study design and documents. The  
5 authors are also grateful to Dr. Dennis Cote (College of Pharmacy, Rady Faculty of  
6 Health Sciences, University of Manitoba) for leading the development of the study  
7 placebos.  
8  
9

10 The following are the members of the KidsCAN PERC Innovative Pediatric Clinical  
11 Trials No OUCH Study Team: Dr. Amy Drendel, Dr. Gareth Hopkin, Dr. Jeff Round, Dr.  
12 Martin Offringa, Dr. Petros Pechlivanoglou, Dr. Eleanor Pullenayegum, David Rios,  
13 Marie-Christine Auclair, Kelly Kim, Lise Bourrier, Lauren Dawson, Kamary Coriolano  
14 DaSilva, Pamela Marples, Rick Watts, Dr. Jennifer Thull-Freedman, Dr. Patrick  
15 McGrath, Dr. Timothy A.D. Graham, Dr. Lisa Hartling, Tannis Erickson, Brendon Foot,  
16 Kurt Schreiner and Julie Leung.  
17  
18  
19  
20  
21  
22  
23  
24  
25  
26  
27  
28  
29  
30  
31  
32  
33  
34  
35  
36  
37  
38  
39  
40  
41  
42  
43  
44  
45  
46  
47  
48  
49  
50  
51  
52  
53  
54  
55  
56  
57  
58  
59  
60

1  
2  
3  
4  
5  
6  
7  
8  
9  
10  
11  
12  
13  
14  
15  
16  
17  
18  
19  
20  
21  
22  
23  
24  
25  
26  
27  
28  
29  
30  
31  
32  
33  
34  
35  
36  
37  
38  
39  
40  
41  
42  
43  
44  
45  
46  
47  
48  
49  
50  
51  
52  
53  
54  
55  
56  
57  
58  
59  
60

**Figures Legend**

Figure 1. Study Interventions

Figure 2. Schedule of Study Measures

**Table Legend**

Table 1. WHO Trial Registration Data Set

For peer review only

## References

1. Spady DW, Saunders DL, Schopflocher DP, et al. Patterns of injury in children: a population-based approach, *Pediatrics* 2004;113:522-9.
2. Canadian Institute for Health Information, (CIHI). National Trauma Registry Report: Major Injury in Canada. *Canadian Institute for Health Information (CIHI)* 2007. Available at: <https://www.cihi.ca/en/national-trauma-registry-report-major-injury-in-canada-2010-2011>. Accessed 21 December 2018.
3. Kircher J, Drendel AL, Newton AS, et al. Acute pediatric musculoskeletal pain management in North America: a practice variation survey, *Clin Pediatr (Phila)* 2014;53:1326-35 doi:10.1177/0009922814555972.
4. Ali S, Chambers A, Johnson DW, et al. Reported practice variation in pediatric pain management: a survey of Canadian pediatric emergency physicians, *CJEM* 2014;16:352-60.
5. Whitson C, Ali S, Wright B, et al. Caregiver acceptance of analgesia for children in the emergency department: a multicentered study. *CJEM* 2017.
6. Kircher J, Drendel AL, Newton AS, et al. Pediatric musculoskeletal pain in the emergency department: a medical record review of practice variation, *CJEM* 2014;16:449-57.
7. LeMay S, Johnston C, Choinière M, et al. Pain management interventions with parents in the emergency department: a randomized trial, *J Adv Nurs* 2010;66:2442-9 doi:10.1111/j.1365-2648.2010.05408.x.
8. American Academy of Pediatrics. Committee on Psychosocial Aspects of Child and Family Health, Task Force on Pain in Infants, Children, and Adolescents. The assessment and management of acute pain in infants, children, and adolescents, *Pediatrics* 2001;108:793-7.
9. Drendel AL, Lyon R, Bergholte J, et al. Outpatient pediatric pain management practices for fractures, *Pediatr Emerg Care* 2006;22:94-9 doi:10.1097/01.pec.0000199564.64264.f4.
10. Friday JH, Kanegaye JT, McCaslin I, et al. Ibuprofen provides analgesia equivalent to acetaminophen-codeine in the treatment of acute pain in children with extremity injuries: a randomized clinical trial, *Acad Emerg Med* 2009;16:711-6 doi:10.1111/j.1553-2712.2009.00471.x.
11. National Institute on Drug Abuse. Opioid Overdose Crisis. 2019. Available at <https://www.drugabuse.gov/drugs-abuse/opioids/opioid-overdose-crisis>. Accessed 03 October 2019.
12. Centers for Disease Control and Prevention. Understanding the Epidemic. 2018. Available at <https://www.cdc.gov/drugoverdose/epidemic/index.html>. Accessed 03 October 2019.
13. Alexander J, Manno M. Underuse of analgesia in very young pediatric patients with isolated painful injuries, *Ann Emerg Med* 2003;41:617-22 doi:10.1067/mem.2003.138.
14. Ali S, Chambers AL, Johnson DW, et al. Paediatric pain management practice and policies across Alberta emergency departments, *Paediatrics & child health* 2014;19:190-4.

15. Le May S, Ali S, Khadra C, et al. Pain Management of Pediatric Musculoskeletal Injury in the Emergency Department: A Systematic Review, *Pain Res Manag* 2016;2016:4809394 doi:10.1155/2016/4809394.
16. Le May S, Ali S, Plint A, et al. Oral Analgesics Utilization for Children With Musculoskeletal Injury (OUCH Trial): An RCT. *Pediatrics* 2017;140.
17. Drendel AL, Gorelick MH, Weisman SJ, et al. A randomized clinical trial of ibuprofen versus acetaminophen with codeine for acute pediatric arm fracture pain, *Ann Emerg Med* 2009;54:553-60 doi:10.1016/j.annemergmed.2009.06.005.
18. Clark E, Plint AC, Correll R, et al. A randomized, controlled trial of acetaminophen, ibuprofen, and codeine for acute pain relief in children with musculoskeletal trauma, *Pediatrics* 2007;119:460-7 doi:10.1542/peds.2006-1347.
19. Ali S, Drendel AL, Rosychuk RJ, et al. Ibuprofen or oxycodone? An observational cohort study of post-emergency department discharge management of children's fracture pain [abstract]. *Canadian Association of Emergency Physicians (CAEP 2016)* 2016.
20. Sharar SR, Bratton SL, Carrougher GJ, et al. A comparison of oral transmucosal fentanyl citrate and oral hydromorphone for inpatient pediatric burn wound care analgesia, *J Burn Care Rehabil* 1998;19:516-21.
21. Givens M, Rutherford C, Joshi G, et al. Impact of an emergency department pain management protocol on the pattern of visits by patients with sickle cell disease, *J Emerg Med* 2007;32:239-43 doi:10.1016/j.jemermed.2006.07.022.
22. Bissonnette B. Pediatric Anesthesia. Shelton, CT: People's Medical Publishing House 2014:2286.
23. Chan A, Tetzlaff JM, Altman DG, et al. SPIRIT 2013 statement: defining standard protocol items for clinical trials, *Ann Intern Med* 2013;158:200-7 doi:10.7326/0003-4819-158-3-201302050-00583.
24. Hartling L, Ali S, Dryden DM, et al. How Safe Are Common Analgesics for the Treatment of Acute Pain for Children? A Systematic Review, *Pain Res Manag* 2016;2016:5346819 doi:10.1155/2016/5346819.
25. Ali S, Drendel AL, Kircher J, et al. Pain management of musculoskeletal injuries in children: current state and future directions, *Pediatr Emerg Care* 2010;26:51-528 doi:10.1097/PEC.0b013e3181e5c02b.
26. Morris L, Stulberg D, Stevermer JJ. Fracture pain relief for kids? Ibuprofen does it better, *J Fam Pract* 2010;59:273-5.
27. Trottier ED, Ali S, Le May S, et al. Treating and Reducing Anxiety and Pain in the Paediatric Emergency Department: The TRAPPED survey, *Paediatr Child Health* 2015;20:239-44.
28. Women and Children's Health Research Institute, (WCHRI). Data Coordinating Centre. <https://www.wchri.org/data-coordinating-centre>. Accessed 21 December 2018.
29. Bjornson CL, Klassen TP, Williamson J, et al. A randomized trial of a single dose of oral dexamethasone for mild croup, *N Engl J Med* 2004;351:1306-13 doi:10.1056/NEJMoa033534.
30. LeMay S, Ballard A, Khadra C, et al. Comparison of the psychometric properties of 3 pain scales used in the pediatric emergency department: Visual Analogue Scale,

- 1  
2  
3 Faces Pain Scale-Revised, and Colour Analogue Scale, *Pain* 2018;159:1508-17  
4 doi:10.1097/j.pain.0000000000001236.
- 5  
6 31. Tsze DS, von Baeyer CL, Pahalyants V, et al. Validity and Reliability of the Verbal  
7 Numerical Rating Scale for Children Aged 4 to 17 Years With Acute Pain, *Annals of*  
8 *Emergency Medicine* 2018;71:69,702.e3 doi:10.1016/j.annemergmed.2017.09.009.
- 9  
10 32. Ramsay MA, Savege TM, Simpson BR, et al. Controlled sedation with alphaxalone-  
11 alphadolone, *British medical journal* 1974;2:656-9.
- 12  
13 33. von Baeyer CL. Children's self-report of pain intensity: what we know, where we are  
14 headed, *Pain research & management* 2009;14:39.
- 15  
16 34. Miró J, Castarlenas E, de la Vega R, et al. Validity of three rating scales for  
17 measuring pain intensity in youths with physical disabilities, *Eur J Pain* 2016;20:130-  
18 7 doi:10.1002/ejp.704.
- 19  
20 35. Castarlenas E, Jensen MP, von Baeyer CL, et al. Psychometric Properties of the  
21 Numerical Rating Scale to Assess Self-Reported Pain Intensity in Children and  
22 Adolescents: A Systematic Review, *Clin J Pain* 2017;33:376-83  
23 doi:10.1097/AJP.0000000000000406.
- 24  
25 36. Castarlenas E, Miró J, Sánchez-Rodríguez E. Is the verbal numerical rating scale a  
26 valid tool for assessing pain intensity in children below 8 years of age? *J Pain*  
27 2013;14:297-304 doi:10.1016/j.jpain.2012.12.004.
- 28  
29 37. Vallner JJ, Stewart JT, Kotzan JA, et al. Pharmacokinetics and bioavailability of  
30 hydromorphone following intravenous and oral administration to human subjects, *J*  
31 *Clin Pharmacol* 1981;21:152-6.
- 32  
33 38. Konstan MW, Hoppel CL, Chai BL, et al. Ibuprofen in children with cystic fibrosis:  
34 pharmacokinetics and adverse effects, *J Pediatr* 1991;118:956-64.
- 35  
36 39. Physician's Desk Reference. 56th ed. Montvale, NJ: Medical Economics Company,  
37 Inc. 2002:2002-5.
- 38  
39 40. Ali S, Poonai N. Parents' preferences on pain treatment, even when faced with  
40 medication dilemmas, influence their decisions to administer opioids in children, *Evid*  
41 *Based Nurs* 2016;19:51-2 doi:10.1136/eb-2015-102164.
- 42  
43 41. Weingarten L, Kircher J, Drendel AL, et al. A survey of children's perspectives on  
44 pain management in the emergency department, *J Emerg Med* 2014;47:268-76  
45 doi:10.1016/j.jemermed.2014.01.038.
- 46  
47 42. Tsze DS, Hirschfeld L, Suarez L, et al. Clinical Interpretation of Changes in Self-  
48 Report Pain Scores in Children with Acute Pain. &nbsp; *Pediatric Academic Societies*  
49 *Annual Conference* May 6, 2017.
- 50  
51 43. Jun E, Ali S, Fowler M, et al. A Survey of Caregiver Perspectives on Opioid Use for  
52 Children's Acute Pain Management. Ongoing Recruitment.
- 53  
54 44. Guidelines for the economic evaluation of health technologies: Canada. 4th ed.  
55 Ottawa: CADTH; 2017 Mar.
- 56  
57 45. Harris PA, Taylor R, Thielke R, et al. Research electronic data capture (REDCap)—A  
58 metadata-driven methodology and workflow process for providing translational  
59 research informatics support, *Journal of Biomedical Informatics* 2009;42:377-81  
60 doi:10.1016/j.jbi.2008.08.010.
46. Poonai N, Bhullar G, Lin K, et al. Oral administration of morphine versus ibuprofen  
to manage postfracture pain in children: a randomized trial, *CMAJ* 2014;186:1358-63  
doi:10.1503/cmaj.140907.

- 1  
2  
3 47. Adhopia V. 'Our new normal': Hard-hit Ohio community fears opioid overdoses will  
4 be perpetual crisis. 2017.  
5 48. Bearman D. When Pain Becomes Criminal: All About Opiate Phobia. *Huffington*  
6 *Post* 2017.  
7 49. Ubelacker S. The inside history of Canada's opioid crisis: Canada is in the midst of  
8 an epidemic of opioid use and abuse. How did we get here? *Maclean's* 2017.  
9 50. International Committee of Medical Journal Editors. 2017. Available at:  
10 [http://www.icmje.org/recommendations/browse/roles-and-responsibilities/defining-](http://www.icmje.org/recommendations/browse/roles-and-responsibilities/defining-the-role-of-authors-and-contributors.html)  
11 [the-role-of-authors-and-contributors.html](http://www.icmje.org/recommendations/browse/roles-and-responsibilities/defining-the-role-of-authors-and-contributors.html). Accessed 21 December 2018.  
12  
13  
14  
15  
16  
17  
18  
19  
20  
21  
22  
23  
24  
25  
26  
27  
28  
29  
30  
31  
32  
33  
34  
35  
36  
37  
38  
39  
40  
41  
42  
43  
44  
45  
46  
47  
48  
49  
50  
51  
52  
53  
54  
55  
56  
57  
58  
59  
60

For peer review only

Table 1. WHO Trial Registration Data Set

| Data Category                                 | Information                                                                                                                                                                                                                                                                                                                                                                                                                                                                                                                                                                                                                                                                                                                                                                                                                                                                                                                                                                                                                                                                                                                                      |
|-----------------------------------------------|--------------------------------------------------------------------------------------------------------------------------------------------------------------------------------------------------------------------------------------------------------------------------------------------------------------------------------------------------------------------------------------------------------------------------------------------------------------------------------------------------------------------------------------------------------------------------------------------------------------------------------------------------------------------------------------------------------------------------------------------------------------------------------------------------------------------------------------------------------------------------------------------------------------------------------------------------------------------------------------------------------------------------------------------------------------------------------------------------------------------------------------------------|
| Primary Registry and Trial Identifying Number | clinicaltrials.gov NCT03767933                                                                                                                                                                                                                                                                                                                                                                                                                                                                                                                                                                                                                                                                                                                                                                                                                                                                                                                                                                                                                                                                                                                   |
| Date of Registration in Primary Registry      | December 7, 2018                                                                                                                                                                                                                                                                                                                                                                                                                                                                                                                                                                                                                                                                                                                                                                                                                                                                                                                                                                                                                                                                                                                                 |
| Secondary Identifying Numbers                 | University of Alberta Research Ethics Board # Pro00073476                                                                                                                                                                                                                                                                                                                                                                                                                                                                                                                                                                                                                                                                                                                                                                                                                                                                                                                                                                                                                                                                                        |
| Source(s) of Monetary or Material Support     | Canadian Institutes of Health Research SPOR Innovative Clinical Trials Grant (MYG-151207)                                                                                                                                                                                                                                                                                                                                                                                                                                                                                                                                                                                                                                                                                                                                                                                                                                                                                                                                                                                                                                                        |
| Primary Sponsor                               | University of Alberta                                                                                                                                                                                                                                                                                                                                                                                                                                                                                                                                                                                                                                                                                                                                                                                                                                                                                                                                                                                                                                                                                                                            |
| Secondary Sponsor(s)                          | -                                                                                                                                                                                                                                                                                                                                                                                                                                                                                                                                                                                                                                                                                                                                                                                                                                                                                                                                                                                                                                                                                                                                                |
| Contact for Public Queries                    | Dr. Samina Ali 780.248.5575 sali@ualberta.ca                                                                                                                                                                                                                                                                                                                                                                                                                                                                                                                                                                                                                                                                                                                                                                                                                                                                                                                                                                                                                                                                                                     |
| Contact for Scientific Queries                | Dr. Samina Ali 780.248.5575 sali@ualberta.ca                                                                                                                                                                                                                                                                                                                                                                                                                                                                                                                                                                                                                                                                                                                                                                                                                                                                                                                                                                                                                                                                                                     |
| Public Title                                  | The No OUCH Study                                                                                                                                                                                                                                                                                                                                                                                                                                                                                                                                                                                                                                                                                                                                                                                                                                                                                                                                                                                                                                                                                                                                |
| Scientific Title                              | A Study of Non-Steroidal or Opioid Analgesia Use for Children with Musculoskeletal Injuries: The No OUCH Study                                                                                                                                                                                                                                                                                                                                                                                                                                                                                                                                                                                                                                                                                                                                                                                                                                                                                                                                                                                                                                   |
| Countries of Recruitment                      | Canada                                                                                                                                                                                                                                                                                                                                                                                                                                                                                                                                                                                                                                                                                                                                                                                                                                                                                                                                                                                                                                                                                                                                           |
| Health Condition(s) or Problem(s) Studied     | Acute musculoskeletal injury                                                                                                                                                                                                                                                                                                                                                                                                                                                                                                                                                                                                                                                                                                                                                                                                                                                                                                                                                                                                                                                                                                                     |
| Intervention(s)                               | <b>Opioid Trial:</b> A. Oral hydromorphone (0.05mg/kg, max 5mg) + Oral ibuprofen (10mg/kg, max 600mg) B. Oral acetaminophen (15mg/kg, max 1000mg) + Oral ibuprofen (10mg/kg, max 600mg)<br><b>Non-Opioid Trial:</b> Oral acetaminophen (15mg/kg, max 1000mg) + Oral ibuprofen (10mg/kg, max 600mg)<br>(Comparator for both trials: Oral ibuprofen 10mg/kg, max 600mg)                                                                                                                                                                                                                                                                                                                                                                                                                                                                                                                                                                                                                                                                                                                                                                            |
| Key Inclusion and Exclusion Criteria          | To be eligible to participate in this study, an individual must meet all of the following criteria: 1. Child aged 6-17 years, 2. Presenting to the emergency department with an acute limb injury (<24 hours old) that is neither obviously deformed nor having neurovascular compromise (as assessed by the triage nurse), 3. Self-reported pain score $\geq 5$ on the 0 to 10 verbal Numerical Rating Scale at triage<br>Exclusion criteria include: 1. Deemed to require immediate intravenous (IV) or intranasal (IN) pain medications by the clinical team, 2. Previously known hypersensitivity to study medications, 3. Acetaminophen or NSAID use within 3 hours prior to recruitment, 4. Opioid use within 1 hour prior to recruitment, 5. Caregiver and/or child cognitive impairment precluding the ability to self-report pain or respond to study questions, 6. Injury suspected to be due to non-accidental trauma/ child abuse (as assessed by the triage nurse or reported by the family), 7. Suspected multi-limb fracture, 8. Chronic pain that necessitates daily analgesic use, 9. Hepatic or renal disease/dysfunction, 10. |



1  
2  
3  
4  
5  
6  
7  
8  
9  
10  
11  
12  
13  
14  
15  
16  
17  
18  
19  
20  
21  
22  
23  
24  
25  
26  
27  
28  
29  
30  
31  
32  
33  
34  
35  
36  
37  
38  
39  
40  
41  
42  
43  
44  
45  
46  
47

|                          |                                                                                                                                                                                                                                                                                                                                                                    |
|--------------------------|--------------------------------------------------------------------------------------------------------------------------------------------------------------------------------------------------------------------------------------------------------------------------------------------------------------------------------------------------------------------|
|                          | Bleeding disorder, 11. Known pregnancy, 12. Vomiting that precludes the ability to take oral medications (as determined by the family), 13. Caregiver and/or child inability to communicate fluently in English or French in the absence of a native language interpreter, 14. Caregiver unavailable for follow-up, or 15. Previous enrolment in the NO OUCH study |
| Study Type               | Randomized, Double-Blind, Placebo-Controlled Superiority Trials                                                                                                                                                                                                                                                                                                    |
| Date of First Enrollment | April 20,2019                                                                                                                                                                                                                                                                                                                                                      |
| Sample Size              | 536                                                                                                                                                                                                                                                                                                                                                                |
| Recruitment Status       | Actively recruiting                                                                                                                                                                                                                                                                                                                                                |
| Primary Outcome(s)       | The <b>Primary Efficacy Outcome</b> will be the self-reported pain score at 60 minutes, using an 11-point 0-10 verbal Numerical Rating Scale (vNRS).                                                                                                                                                                                                               |
| Key Secondary Outcomes   | The <b>Principal Safety Endpoint</b> will be the proportion of children with adverse events related to study drug administration.                                                                                                                                                                                                                                  |
| Ethics Review            | University of Alberta Research Ethics Board # Pro00073476                                                                                                                                                                                                                                                                                                          |
| Completion date          | -                                                                                                                                                                                                                                                                                                                                                                  |
| Summary Results          | -                                                                                                                                                                                                                                                                                                                                                                  |
| IPD sharing statement    | De-identified data can be shared, on a case-by-case basis, upon discussion with the principal investigator.                                                                                                                                                                                                                                                        |

For peer review only

**Figure 1. Study Interventions**

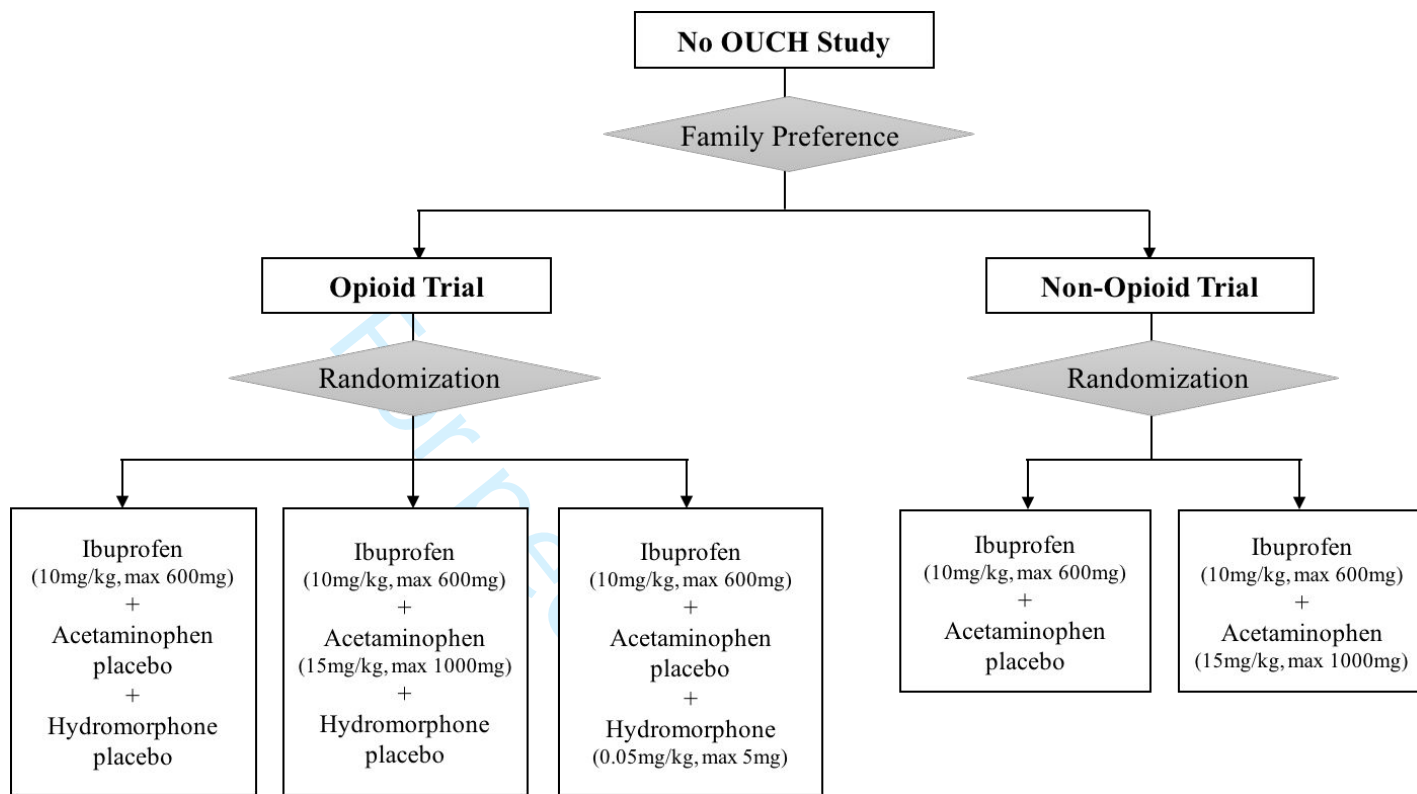

1  
2  
3  
4  
5  
6  
7  
8  
9  
10  
11  
12  
13  
14  
15  
16  
17  
18  
19  
20  
21  
22  
23  
24  
25  
26  
27  
28  
29  
30  
31  
32  
33  
34  
35  
36  
37  
38  
39  
40  
41  
42  
43  
44  
45  
46  
47  
48  
49  
50  
51  
52  
53  
54  
55  
56  
57  
58  
59  
60

For peer review only

**Figure 2. Schedule of Study Measures**

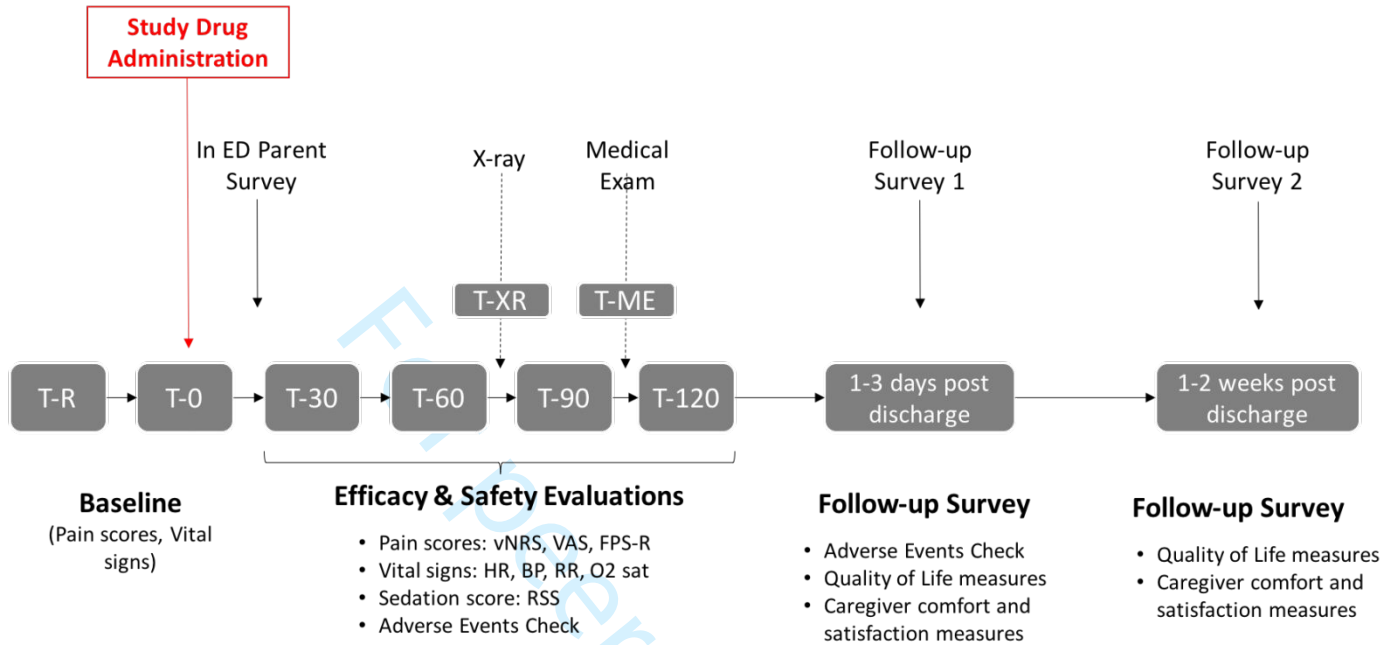

vNRS=verbal Numerical Rating Scale; VAS=Visual Analog Scale; FPS-R=Faces Pain Scale-Revised; RSS=Ramsay Sedation Scale

---

**PARENT/GUARDIAN CONSENT FORM**

**Title of Study:** A Study of Non-Steroidal or Opioid Analgesia Use for Children with Musculoskeletal Injuries

**Principal Investigator:** Dr. Samina Ali

(780) 248-5574

**Research Coordinator:** Ms. Manasi Rajagopal

(780) 248-5440

---

**Why am I being asked to consider this research study?**

You are being asked if you and your child would like to be part of a research study. In this study, we are trying to determine the best ways to treat children's pain due to a limb injury. You are being asked to take part as your child may have pain due to an injury and is between 6 and 17 years old.

Before you make your decision one of the research team members will review this form with you. A copy of this sheet will be given to you to keep. If you would like more information, please feel free to ask. You are encouraged to ask questions if you feel anything needs to be made clearer. Please take the time to read this document carefully.

If your child is old enough to understand this information we would also like you to talk to them about being part of the study. If your child is 7 years of age or older, we would like you both to sign a form if you would like to participate in the study.

**What is the reason for doing the study?**

The purpose of this research study is to figure out which of three pain medicines best treats a child's pain. The pain medicines we are studying are ibuprofen (Advil/Motrin), acetaminophen (Tylenol/Temptra), and hydromorphone (Dilaudid). Ibuprofen and acetaminophen are the top two medicines used in the world and are approved for children's pain in Canada. Hydromorphone is used and approved for treating many kinds of children's pain in Canada, and we have received Health Canada approval to study it for the pain of limb injuries, since Canada has not yet approved it specifically for this problem. This study will help us figure out which pain medicine or combination of pain medicines works best for children with limb injuries. We would also like to understand the thoughts and feelings you have when making decisions about pain medication for your child.

This study is being conducted in six children's hospitals across Canada, and we will ask a total of over 500 children to be part of this study. Approximately 100 of these children will be recruited from the Stollery Emergency Department.

**What will happen in the study?**

If you agree to take part in this study, we will ask you to select which one of our two study groups you would like to be enrolled in: Group 1 OR Group 2. Regardless of which study you choose, your child will, at minimum, receive ibuprofen (Advil/Motrin) for their pain.

If you select **Group 1**, your child will have an equal chance of receiving one of the two medicine options below. This will be decided by the computer at random, so there is an equal chance of receiving either option, like the toss of a coin.

1. Oral liquid Ibuprofen (Advil/Motrin) only OR
2. Oral liquid Ibuprofen (Advil/Motrin) and oral liquid acetaminophen (Tylenol/Tempra)

If you select **Group 2**, your child will have an equal chance of receiving one of the following three medicine options:

1. Oral liquid Ibuprofen only (Advil/Motrin) OR
2. Oral liquid Ibuprofen (Advil/Motrin) and oral liquid acetaminophen (Tylenol/Tempra) OR
3. Oral liquid Ibuprofen (Advil/Motrin) and oral liquid hydromorphone (Dilaudid)

If you don't have a preference for a study group, we will assign you to Group 2, as this group includes all three of the options you might be offered when participating in this research study.

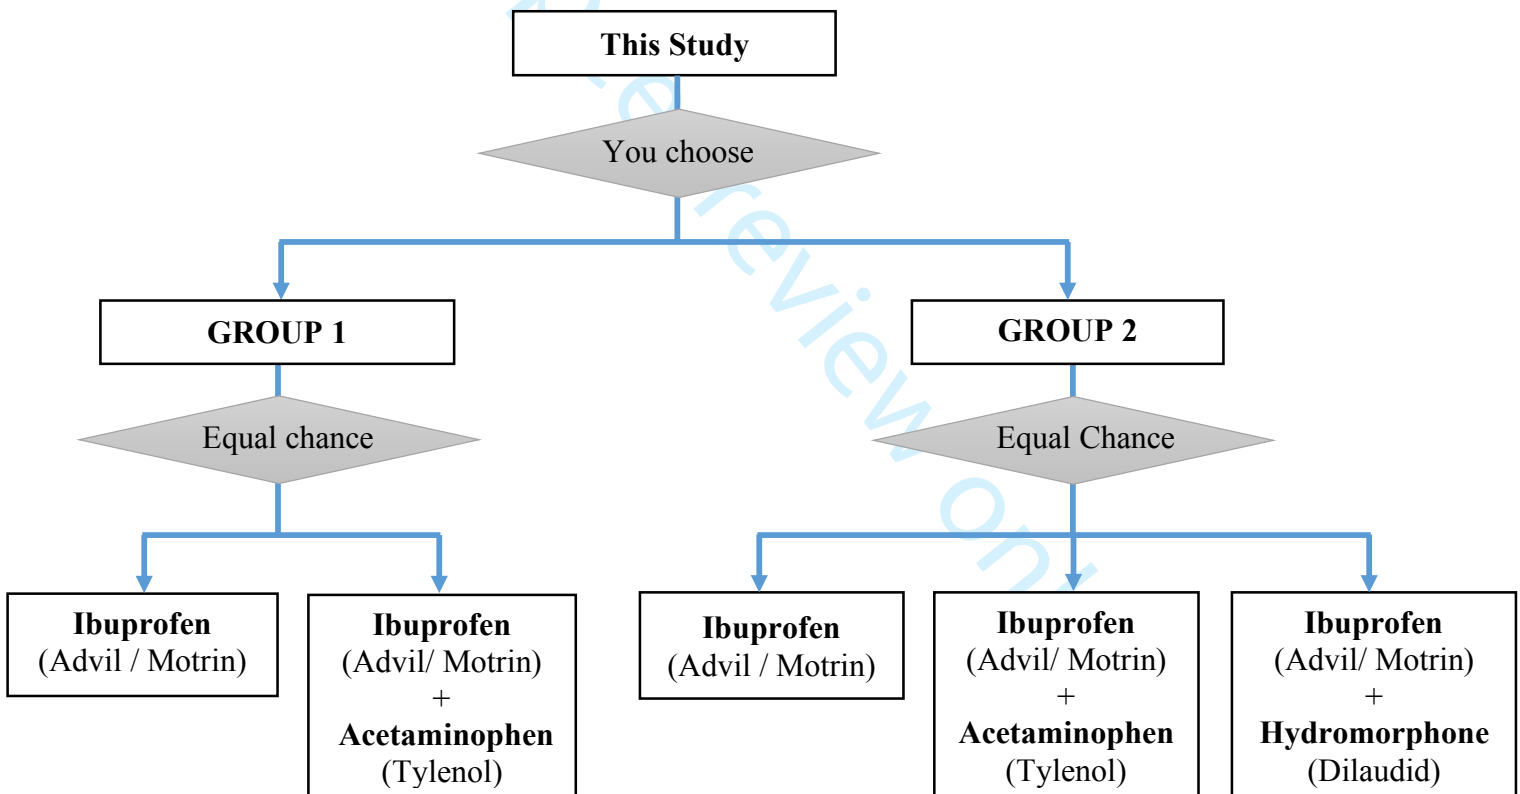

All children in the study will receive ibuprofen (Advil/Motrin), which is the standard medicine given to children for injury-related pain. Some children will also receive either acetaminophen (Tylenol/Tempra) or hydromorphone (Dilaudid). Neither the study nurse nor your doctor will know which combination of medicines your child has received for the study, but if we need to know this for medical reasons we can find out. After the study medicines have been given, your child may also get further medicines, which are not part of the study, as routinely recommended by the emergency doctor who is taking care of your child.

During the study your child will be monitored closely by the study nurse. The study nurse will measure your child's heart rate, breathing rate, blood pressure, oxygen levels, and pain levels every 30 minutes for up to 2 hours. They will also measure your child's pain when the doctor examines him/her and immediately following any X-ray procedures. If your child's medical care is finished before the 2-hour study period, and you are ready to leave, this is not a problem. Our research nurse will collect the measurements from your child one last time, and then you can go home, at your will. Participating in this study should NOT delay your leaving the emergency department or affect the timing of when the doctor will see you.

We will ask you to complete a short 5-minute questionnaire on an iPad, while you are in the emergency department today. This questionnaire will ask about your demographics, your child's injury and about your reasons for choosing your study group (ie. Group 1 vs. Group 2). We will also complete two 5-10 minute follow up surveys to see how your child is doing. You will have the option of completing these by email (we will send you a link through a secure online portal called REDCap) or over the phone. The survey will be done 24 hours after you leave the emergency department, and again 1 week after. After the two surveys are done, your part of this study is done.

#### **What are the risks and discomforts?**

Your child may experience side effects from participating in this study. Some side effects are known and listed below, but there may be risks in this study that are currently not known. If we find out anything new during the course of this study that may change your willingness to be in the study, we will tell you about these findings.

Based on our team's previous work, we expect nausea, mild dizziness, and tiredness to be possible non-serious common side effects. It is possible that your child might experience this. There is a very rare risk of serious drowsiness and low breathing rate following the use of any opioid medicine; this is extremely rare when the medicine is taken by mouth, like it is in this study. Even though such events are very rare, we want to make sure that your child is safe at all times. So, our research nurse will be watching your child closely for these effects and will even use an oxygen monitor to closely observe them. If such an event were to occur, the emergency team of doctors and nurses would take care of your child, as they are already present in the department.

Finally, there is an extremely rare risk of an allergic reaction to one of the study medicines.

#### **What are the benefits to my child?**

Your child may not benefit directly from being in the study, but you will be helping us understand how to best treat pain in children who come to the emergency department.

#### **What happens if my child is injured because of this research?**

If your child becomes ill or injured as a result of being in this study, he/she will receive necessary medical treatment, at no additional cost to you. By signing this consent form you are not releasing the investigator(s), institution(s) and/or sponsor(s) from their legal and professional responsibilities. Contact the principal investigator, Dr. Samina Ali, at 780-248-5574, if your child has suffered an injury. If required, go to the emergency department right away.

**Do I have to take part in the study?**

Being in this study is your and your child's choice. If you decide to be in the study, you can change your mind and stop being in the study at any time by letting the research nurse know. This will in no way affect the care or treatment that your child is entitled to.

**Can our participation in the study end early?**

In addition to you being able to stop the study at any time, the study doctor may withdraw your child from this study for reasons such as:

- Your child is unable to tolerate the study medication
- The study doctor no longer feels this is the best option for your child

If your child is removed from this study, the research team will discuss the reasons with you and plans will be made for your child's continued care outside of the study.

**Are there other choices to being in this research study?**

If you choose not to take part in this study today, your child's doctors and nurses will decide what medicines to treat your child's pain with.

**What will it cost me to participate?**

There will be no costs to you to be in this study.

**Will my information be kept private?**

During the study, we will be collecting health data about your child. We will do everything we can to make sure that this data is kept private. No data relating to this study that includes your child's name will be released outside of the study doctor's office or published by the researchers. Sometimes, by law, we may have to release your information with your name in it so we cannot guarantee absolute privacy. However, we will make every legal effort to make sure that your health information is kept private.

The study doctor/study staff will look at your child's personal health records held at the hospital, and/or kept by other health care providers that your child may have seen in the past (i.e. your family doctor). Any personal health information that we get from these records will be only what is needed for the study.

During research studies, it is important that the data we get is accurate. For this reason, your child's health data, including their name, may be looked at by people from: the research team, the study sponsor (University of Alberta), the University of Alberta auditors, clinical trial monitors, and Research Ethics Board, and Health Canada. By signing this consent form you are giving permission for the study doctor/staff to collect, use and disclose information about your child from his/her personal health records, as described above.

After the study is done, we will still need to securely store your health data that was collected as part of the study. In Canada, the law says we have to keep the data stored for 25 years after the end of the study. The data we collect will be stored, in Canada, on a system called REDCap. It will be accessible to and managed by, staff at the Women & Children's Health Research Institute



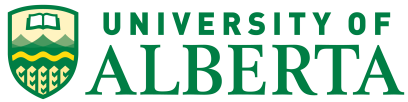

at the University of Alberta. If you leave the study, we will not collect new health information about you, but we will need to keep the data that we have already collected.

After study completion, your study data may be used again by other researchers. Any of your personal information (i.e. your name, address, telephone number) that can identify you will be removed or changed before files are shared with other researchers. Researchers that wish to use study data must 1) have their new study approved by an ethics board; 2) sign an agreement ensuring your confidentiality and restricting data use to only the approved study.

### **What if I have questions?**

If you have any questions about the research now or later, please contact the principal investigator Dr. Samina Ali at 780 248 5574, or the research coordinator Ms. Manasi Rajagopal at 780 248 5440.

If you have any questions regarding your rights as a research participant, you may contact the Health Research Ethics Board at 780-492-2615. This office is independent of the study investigators.

A copy of this sheet will be given to you to keep. This study is funded by the Canadian Institutes of Health Research and the Women and Children's Health Research Institute. The Institution and study doctor are getting money from the study sponsor to cover the costs of doing this study. You are entitled to request any details concerning this compensation from the Principal Investigator.

review only

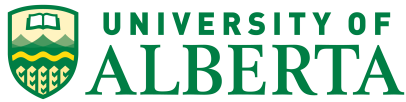

**CONSENT**

**Title of Study:** A Study of Non-Steroidal or Opioid Analgesia Use for Children with Musculoskeletal Injuries

**Principal Investigator(s):** Dr. Samina Ali  
**Research Coordinator:** Ms. Manasi Rajagopal

**Phone Number:** 780 248 5574  
**Phone Number:** 780 248 5440

|                                                                                                                                                                            | <u>Yes</u>                                  | <u>No</u>                |
|----------------------------------------------------------------------------------------------------------------------------------------------------------------------------|---------------------------------------------|--------------------------|
| Do you understand that you and your child have been asked to be in a research study?                                                                                       | <input type="checkbox"/>                    | <input type="checkbox"/> |
| Have you read and received a copy of the attached Information Sheet?                                                                                                       | <input type="checkbox"/>                    | <input type="checkbox"/> |
| Do you understand the benefits and risks involved in taking part in this research study?                                                                                   | <input type="checkbox"/>                    | <input type="checkbox"/> |
| Have you had an opportunity to ask questions and discuss this study?                                                                                                       | <input type="checkbox"/>                    | <input type="checkbox"/> |
| Do you understand that you and your child are free to leave the study at any time, without having to give a reason and without affecting your child's future medical care? | <input type="checkbox"/>                    | <input type="checkbox"/> |
| Has the issue of confidentiality been explained to you?                                                                                                                    | <input type="checkbox"/>                    | <input type="checkbox"/> |
| Do you understand who will have access to your child's records, including personally identifiable health information?                                                      | <input type="checkbox"/>                    | <input type="checkbox"/> |
| Who explained this study to you? _____                                                                                                                                     |                                             |                          |
| I agree for my child and I to take part in this study, and I have the legal authority to give this consent.                                                                |                                             |                          |
| Signature of Parent or Guardian _____                                                                                                                                      |                                             |                          |
| (Printed Name) _____                                                                                                                                                       |                                             |                          |
| Date: _____                                                                                                                                                                | Time: _____ : _____ AM / PM<br>(circle one) |                          |
| I believe that the person signing this form understands what is involved in the study and voluntarily agrees to participate.                                               |                                             |                          |
| Signature of Investigator or Designee _____                                                                                                                                |                                             |                          |
| Date: _____<br>(dd / mmm / yyyy)                                                                                                                                           | Time: _____ : _____ (24h clock)             |                          |

**THE INFORMATION SHEET MUST BE ATTACHED TO THIS CONSENT FORM AND A SIGNED COPY GIVEN TO THE RESEARCH PARTICIPANT**

---

**CHILD ASSENT FORM**

**Title of Study:** A Study of Non-Steroidal or Opioid Analgesia Use for Children with Musculoskeletal Injuries: The No OUCH Trials

**Principal Investigator:** Dr. Samina Ali

**Phone Number:** (780) 248-5574

**Study Coordinator:** Ms. Manasi Rajagopal

**Phone Number:** (780) 248-5440

We want to tell you about a research study we are doing. A research study is a way to learn new information about something. Children do not need to be in a research study if they don't want to.

**Why am I being asked to be in this study?**

We would like to find out more about what pain medicine works best for children with sprains or broken bones. You are being asked to join the study because you have pain due to an injury. Over 500 kids will take part in this study.

**If I join the study, what will I have to do?**

If you and your parent agree to take part, we will ask you to do a few things:

- First, we will ask you to take some pain medicines.
- Then, we will ask you to tell us about your pain, how you are feeling, and if you have any bad effects from the medicines we gave you.
- While you are in the emergency department, we will also check your heart rate and breathing.
- After you leave here, we will call or email your parents tomorrow and again after 1 week, to see how you are doing.

**Will any part of the study hurt?**

No, but sometimes kids can feel a little bit tired or sleepy after taking pain medicine. It is possible that you might feel this, but your parents and the research nurse will be there to help you, if this happens.

**Will the study help me?**

If you take part in this study, we hope the medicine we give you will help you. Even if you don't take part in the study, you can still ask your nurse for pain medicine, if you need it.

**Will the study help others?**

This study will help us figure out the best way to take care of kids' pain in the future.

**What do I get for being in this study?**

There are no direct cash or gifts for you for helping with this study.

### **Can I say no?**

Yes, of course, you do not have to be in the study. It's up to you. If you do join the study, you can change your mind and stop being part of it at any time. No one will upset if you decide you don't want to do this study or if you decide to stop part way through. You can tell your parents, your doctor or the research nurse if you want to quit. Before you say **yes or no** to being in this study, the research nurse will answer any questions you have. If you join the study, you can ask questions at any time.

### **What other choices do I have if I say no to this study?**

If you choose not to be in this study, your doctor and nurse will decide what pain medicines to give you. The three medicines that we are using in this study are the most commonly used medicines for this type of injury.

### **Do my parents know about this study?**

This study was explained to your parents and they said that we could ask you if you want to be in it. You can talk this over with them before you decide.

### **Who will see information about me?**

The information collected about you during this study will be kept safe. Nobody will know it except the people doing the research. The study information about you will NOT be given to your friends or teachers or anybody else.

### **What if I have any questions?**

You can ask your mom or dad about anything you don't understand. You can also talk to the research nurse who is here, today. Dr. Samina Ali is the main doctor in charge of this study. If you have any questions about this study that you didn't think of now, either you can call or have your parents call her at 780 248 5574. You will be given a copy of this paper to keep.

### **Would you like to take part in this study?**

**Yes, I will be in this research study.**

**No, I don't want to do this.**

\_\_\_\_\_: \_\_\_\_ am / pm  
 Child's Name      Signature of Child      Date      (circle one)

Assent was obtained verbally

Age at the time of assent: \_\_\_\_ years

\_\_\_\_\_: \_\_\_\_  
 Person obtaining Assent      Signature      Date (dd/ mmm/yyyy)      (24h clock)

A study of Non-Steroidal Or Opioid Analgesia Use for Children with Musculoskeletal Injuries: The No OUCH Trials

| REB # :            | Screening ID                             | Enrolment Date                |
|--------------------|------------------------------------------|-------------------------------|
| PI: Dr. Samina Ali | ____ - ____<br>(site) (screening number) | __ / __ / 20__<br>dd mmm yyyy |

## REDCap Forms: Summary

| Time Point / Section                          |                                                                                                                                                                                                                                                                                                         |
|-----------------------------------------------|---------------------------------------------------------------------------------------------------------------------------------------------------------------------------------------------------------------------------------------------------------------------------------------------------------|
| <b>Screening</b>                              | <ul style="list-style-type: none"> <li>➤ Pre-Screening</li> <li>➤ Eligibility</li> <li>➤ Informed Consent</li> <li>➤ Evaluation 1 (TR)</li> <li>➤ Injury Details and Previous History</li> <li>➤ Medical Oversight of Screening</li> </ul>                                                              |
| <b>T0 (Time of Study Drug Administration)</b> | <ul style="list-style-type: none"> <li>➤ Selection of Family Preference</li> <li>➤ Study Drug Administration</li> <li>➤ Evaluation 2 (T0)</li> <li>➤ Evaluation Time point Calculator (will be programmed in REDCap)</li> <li>➤ Contact Information Sheet</li> <li>➤ In PED Caregiver Survey</li> </ul> |
| <b>T30</b>                                    | <ul style="list-style-type: none"> <li>➤ Evaluation 3</li> </ul>                                                                                                                                                                                                                                        |
| <b>T60</b>                                    | <ul style="list-style-type: none"> <li>➤ Evaluation 4</li> </ul>                                                                                                                                                                                                                                        |
| <b>T90</b>                                    | <ul style="list-style-type: none"> <li>➤ Evaluation 5</li> </ul>                                                                                                                                                                                                                                        |
| <b>T120</b>                                   | <ul style="list-style-type: none"> <li>➤ Evaluation 6</li> </ul>                                                                                                                                                                                                                                        |
| <b>TME (Time of Medical Exam)</b>             | <ul style="list-style-type: none"> <li>➤ Evaluation 7</li> </ul>                                                                                                                                                                                                                                        |
| <b>TXR (Time of X-Ray)</b>                    | <ul style="list-style-type: none"> <li>➤ Evaluation 8</li> </ul>                                                                                                                                                                                                                                        |
| <b>PRE-Discharge</b>                          | <ul style="list-style-type: none"> <li>➤ ED Discharge Evaluation (only complete if discharged before 120 min)</li> <li>➤ Pre-discharge Questions (complete with ALL families)</li> </ul>                                                                                                                |
| <b>POST-Discharge</b>                         | <ul style="list-style-type: none"> <li>➤ Post-discharge Questions</li> </ul>                                                                                                                                                                                                                            |
| <b>Follow-up Survey 1 (24h)</b>               | <ul style="list-style-type: none"> <li>➤ Call Log</li> <li>➤ Follow-up Survey 1 (24h)</li> </ul>                                                                                                                                                                                                        |
| <b>Follow-up Survey 2 (1-2w)</b>              | <ul style="list-style-type: none"> <li>➤ Call Log</li> <li>➤ Follow-up Survey 1 (1-2w)</li> </ul>                                                                                                                                                                                                       |
| <b>Logs</b>                                   | <ul style="list-style-type: none"> <li>➤ Concomitant and Rescue Medications</li> <li>➤ Adverse Events</li> <li>➤ Protocol Deviations</li> <li>➤ Unanticipated Problems</li> <li>➤ Early Withdrawal Form</li> </ul>                                                                                      |

A study of Non-Steroidal Or Opioid Analgesia Use for Children with Musculoskeletal Injuries: The No OUCH Trials

| REB # :            | Screening ID                               | Enrolment Date               |
|--------------------|--------------------------------------------|------------------------------|
| PI: Dr. Samina Ali | _____ - _____<br>(site) (screening number) | ___/___/20___<br>dd mmm yyyy |

**Pre-Screening (electronic SEMO Log)**

|                                                         |                                                                                                                                                                                                                                                                                                                                   |                                 |
|---------------------------------------------------------|-----------------------------------------------------------------------------------------------------------------------------------------------------------------------------------------------------------------------------------------------------------------------------------------------------------------------------------|---------------------------------|
| Site                                                    | <input type="checkbox"/> Edmonton AB (1)<br><input type="checkbox"/> Calgary AB (2)<br><input type="checkbox"/> Winnipeg MB (3)<br><input type="checkbox"/> Montreal QC (4)<br><input type="checkbox"/> London ON (5)<br><input type="checkbox"/> Ottawa ON (6)                                                                   |                                 |
| Name of Research Nurse completing screening / enrolment | First and Last Name                                                                                                                                                                                                                                                                                                               |                                 |
| Date and Time of Triage                                 | ___/___/___<br>dd mmm yyyy<br>___:___<br>(24 hour clock)                                                                                                                                                                                                                                                                          |                                 |
| Age                                                     | _____ years                                                                                                                                                                                                                                                                                                                       |                                 |
| Sex                                                     | <input type="checkbox"/> Male                                                                                                                                                                                                                                                                                                     | <input type="checkbox"/> Female |
| Was the family approached for this study?               | <input type="checkbox"/> Yes                                                                                                                                                                                                                                                                                                      | <input type="checkbox"/> No     |
| <u>If NO,</u> specify reason and STOP HERE.             | <input type="checkbox"/> Family refused overall consent to be approached for research<br><input type="checkbox"/> Legal guardian not present<br><input type="checkbox"/> RA busy with another study<br><input type="checkbox"/> Did not meet eligibility criteria, specify _____<br><input type="checkbox"/> Other, Specify _____ |                                 |
| <u>If YES,</u> continue to Eligibility.                 |                                                                                                                                                                                                                                                                                                                                   |                                 |

**A study of Non-Steroidal Or Opioid Analgesia Use for Children with Musculoskeletal Injuries: The No OUCH Trials**

| REB # :            | Screening ID                             | Enrolment Date               |
|--------------------|------------------------------------------|------------------------------|
| PI: Dr. Samina Ali | ____ - ____<br>(site) (screening number) | ___/___/20___<br>dd mmm yyyy |

## Eligibility

Was verbal consent for screening obtained from the family?  Yes  No

## Inclusion Criteria

|                                                                                                                                                                                               |                              |                             |
|-----------------------------------------------------------------------------------------------------------------------------------------------------------------------------------------------|------------------------------|-----------------------------|
| 1. Child aged 6-17 years                                                                                                                                                                      | <input type="checkbox"/> Yes | <input type="checkbox"/> No |
| 2. Presenting to the emergency department with an acute limb injury (<24 hours old) that is neither obviously deformed nor having neuro-vascular compromise (as assessed by the triage nurse) | <input type="checkbox"/> Yes | <input type="checkbox"/> No |
| 3. Self-reported pain score $\geq 5$ on the 0 to 10 verbal Numerical Rating Scale (vNRS) at triage                                                                                            | <input type="checkbox"/> Yes | <input type="checkbox"/> No |

## Exclusion Criteria

|                                                                                                                                   |                              |                             |
|-----------------------------------------------------------------------------------------------------------------------------------|------------------------------|-----------------------------|
| 1. Deemed to require intravenous (IV) or intranasal (IN) pain medications by the clinical team                                    | <input type="checkbox"/> Yes | <input type="checkbox"/> No |
| 2. Previously known hypersensitivity to study medications                                                                         | <input type="checkbox"/> Yes | <input type="checkbox"/> No |
| 3. Acetaminophen or non-steroidal anti-inflammatory medication (NSAID) use, within 3 hours prior to recruitment                   | <input type="checkbox"/> Yes | <input type="checkbox"/> No |
| 4. Opioid use within 1 hour prior to recruitment                                                                                  | <input type="checkbox"/> Yes | <input type="checkbox"/> No |
| 5. Caregiver and/or child cognitive impairment precluding the ability to self-report pain or respond to study questions           | <input type="checkbox"/> Yes | <input type="checkbox"/> No |
| 6. Injury suspected to be due to non-accidental trauma/ child abuse (as assessed by the triage nurse or reported by the family)   | <input type="checkbox"/> Yes | <input type="checkbox"/> No |
| 7. Suspected multi-limb fracture                                                                                                  | <input type="checkbox"/> Yes | <input type="checkbox"/> No |
| 8. Chronic pain that necessitates daily analgesic use                                                                             | <input type="checkbox"/> Yes | <input type="checkbox"/> No |
| 9. Hepatic or renal disease/dysfunction                                                                                           | <input type="checkbox"/> Yes | <input type="checkbox"/> No |
| 10. Bleeding disorder                                                                                                             | <input type="checkbox"/> Yes | <input type="checkbox"/> No |
| 11. Known pregnancy                                                                                                               | <input type="checkbox"/> Yes | <input type="checkbox"/> No |
| 12. Vomiting that precludes the ability to take oral medications (as determined by the family)                                    | <input type="checkbox"/> Yes | <input type="checkbox"/> No |
| 13. Caregiver and/or child inability to communicate fluently in English or French in the absence of a native language interpreter | <input type="checkbox"/> Yes | <input type="checkbox"/> No |
| 14. Caregiver unavailable for follow-up                                                                                           | <input type="checkbox"/> Yes | <input type="checkbox"/> No |
| 15. Previous enrollment in study                                                                                                  | <input type="checkbox"/> Yes | <input type="checkbox"/> No |

**REDCap to display if family is eligible or not based on above answers. RRN to confirm below.**

|                               |                              |                             |
|-------------------------------|------------------------------|-----------------------------|
| Is family eligible for study? | <input type="checkbox"/> Yes | <input type="checkbox"/> No |
|-------------------------------|------------------------------|-----------------------------|

## A study of Non-Steroidal Or Opioid Analgesia Use for Children with Musculoskeletal Injuries: The No OUCH Trials

| REB # :            | Screening ID                             | Enrolment Date                      |
|--------------------|------------------------------------------|-------------------------------------|
| PI: Dr. Samina Ali | ____ - ____<br>(site) (screening number) | ____ / ____ / 20____<br>dd mmm yyyy |

## Informed Consent

|                                                                                                                                                                                                                               |                                                                                                                                                  |
|-------------------------------------------------------------------------------------------------------------------------------------------------------------------------------------------------------------------------------|--------------------------------------------------------------------------------------------------------------------------------------------------|
| Has written informed consent been obtained?                                                                                                                                                                                   | <input type="checkbox"/> Yes<br><input type="checkbox"/> No                                                                                      |
| <b>If NO</b> , specify reason and STOP HERE.                                                                                                                                                                                  | <input type="checkbox"/> Declined consent<br><input type="checkbox"/> Declined assent<br><input type="checkbox"/> Other, please specify<br>_____ |
| <b>If YES</b> , specify the date and time of Informed Consent:                                                                                                                                                                | ____ / ____ / ____<br>dd mmm yyyy<br>____ : ____<br>(24 hour clock)                                                                              |
| Has a copy of the signed informed consent been given to the family?                                                                                                                                                           | <input type="checkbox"/> Yes<br><input type="checkbox"/> No                                                                                      |
| <i>If no, specify reason:</i>                                                                                                                                                                                                 |                                                                                                                                                  |
| Has written assent been obtained?                                                                                                                                                                                             | <input type="checkbox"/> Yes<br><input type="checkbox"/> No<br><input type="checkbox"/> No, but verbal assent was obtained and documented        |
| <i>If no, specify reason and STOP HERE.</i>                                                                                                                                                                                   |                                                                                                                                                  |
| Has a copy of the signed assent been given to the family?                                                                                                                                                                     | <input type="checkbox"/> Yes<br><input type="checkbox"/> No                                                                                      |
| <i>If no, specify reason:</i>                                                                                                                                                                                                 |                                                                                                                                                  |
| Permission to contact for future studies?                                                                                                                                                                                     | <input type="checkbox"/> Yes<br><input type="checkbox"/> No                                                                                      |
| [Stollery Site ONLY] Would you be interested in being contacted, later, about a second related study? We want to better understand how parents make medical decisions for their children when they are injured and have pain. | <input type="checkbox"/> Yes<br><input type="checkbox"/> No                                                                                      |

If ALL the inclusion and exclusion criteria are met AND written consent and assent have been obtained, please proceed.

If NOT, please STOP here.



## A study of Non-Steroidal Or Opioid Analgesia Use for Children with Musculoskeletal Injuries: The No OUCH Trials

| REB # :            | Screening ID                               | Enrolment Date                      |
|--------------------|--------------------------------------------|-------------------------------------|
| PI: Dr. Samina Ali | _____ - _____<br>(site) (screening number) | ____ / ____ / 20____<br>dd mmm yyyy |

## Evaluation # 1 (TR – Recruitment)

|                                                                                                                                                                                                                                                                                                                                                                                                                                                                                                                                                                                                                                                                                                                                |                                                                                                                                                                                                           |
|--------------------------------------------------------------------------------------------------------------------------------------------------------------------------------------------------------------------------------------------------------------------------------------------------------------------------------------------------------------------------------------------------------------------------------------------------------------------------------------------------------------------------------------------------------------------------------------------------------------------------------------------------------------------------------------------------------------------------------|-----------------------------------------------------------------------------------------------------------------------------------------------------------------------------------------------------------|
| Was this evaluation completed?                                                                                                                                                                                                                                                                                                                                                                                                                                                                                                                                                                                                                                                                                                 | <input type="checkbox"/> Yes <input type="checkbox"/> No                                                                                                                                                  |
| If Yes, continue. If No, specify reason:                                                                                                                                                                                                                                                                                                                                                                                                                                                                                                                                                                                                                                                                                       |                                                                                                                                                                                                           |
| <u>Date and Time of evaluation # 1:</u>                                                                                                                                                                                                                                                                                                                                                                                                                                                                                                                                                                                                                                                                                        | ____ / ____ / ____<br>dd mmm yyyy<br>____ : ____<br>(24 hour clock)                                                                                                                                       |
| <u>Vital Signs:</u><br><br><i>Record triage vital signs here. Please measure a new set of vital signs if triage time is ≥60 minutes from time of recruitment.</i>                                                                                                                                                                                                                                                                                                                                                                                                                                                                                                                                                              | HR: _____ bpm<br>RR: _____ rpm<br>Sat: _____ %<br>BP: _____ / _____ mmHg                                                                                                                                  |
| <u>Pain Scores:</u><br><br><b>vNRS</b><br>“On a scale of 0 to 10, where 0 is no pain and 10 is the worst pain you can imagine, what is your pain level now?”<br><br><b>VAS</b><br>“What is your pain level on this sliding scale, where 0 means absence of pain and 100 is the worst pain you have ever experienced?”<br><br><b>FPS-R</b><br>“These faces show how much something can hurt. This face (point to left most face) shows no pain. The faces show more and more pain (point from left to right) up to this one (point to right most face) – it shows very much pain. Can you point to the face that shows how much you hurt right now?”<br>Note: say “hurt” or “pain” whichever seems right for a particular child | _____/10<br><br>_____/100 mm<br><br><input type="checkbox"/> 0 <input type="checkbox"/> 2 <input type="checkbox"/> 4<br><input type="checkbox"/> 6 <input type="checkbox"/> 8 <input type="checkbox"/> 10 |

A study of Non-Steroidal Or Opioid Analgesia Use for Children with Musculoskeletal Injuries: The No OUCH Trials

| REB # :            | Screening ID                             | Enrolment Date                      |
|--------------------|------------------------------------------|-------------------------------------|
| PI: Dr. Samina Ali | ____ - ____<br>(site) (screening number) | ____ / ____ / 20____<br>dd mmm yyyy |

## Injury Details and Previous History

|                                 |                                                          |
|---------------------------------|----------------------------------------------------------|
| <u>Date and Time of Injury:</u> | ____ / ____ / ____ : ____<br>dd mmm yyyy (24 hour clock) |
|---------------------------------|----------------------------------------------------------|

| <u>Location of Primary Injury:</u>                                                                                                                                                                                                                                                                                              |                                                                                                                                                                                                                                                                               |
|---------------------------------------------------------------------------------------------------------------------------------------------------------------------------------------------------------------------------------------------------------------------------------------------------------------------------------|-------------------------------------------------------------------------------------------------------------------------------------------------------------------------------------------------------------------------------------------------------------------------------|
| Please select the location of the PRIMARY injury (pick ONE only)                                                                                                                                                                                                                                                                |                                                                                                                                                                                                                                                                               |
| <input type="checkbox"/> Single or Multiple Fingers (if ONLY injury)<br><input type="checkbox"/> Hand<br><input type="checkbox"/> Wrist<br><input type="checkbox"/> Forearm<br><input type="checkbox"/> Elbow<br><input type="checkbox"/> Upper Arm<br><input type="checkbox"/> Shoulder<br><input type="checkbox"/> Collarbone | <input type="checkbox"/> Single or Multiple Toes (if ONLY injury)<br><input type="checkbox"/> Foot<br><input type="checkbox"/> Ankle<br><input type="checkbox"/> Lower leg<br><input type="checkbox"/> Knee<br><input type="checkbox"/> Thigh<br><input type="checkbox"/> Hip |

| <u>Concomitant Digit Injury:</u>                                                           |                                                                                                         |
|--------------------------------------------------------------------------------------------|---------------------------------------------------------------------------------------------------------|
| Is there a concomitant digit injury present <b><u>on the same limb?</u></b>                | <input type="checkbox"/> Yes<br><input type="checkbox"/> No                                             |
| <u>If yes,</u> please select the location of the secondary injury ( <u>pick ONE only</u> ) | <input type="checkbox"/> Single or Multiple fingers<br><input type="checkbox"/> Single or Multiple toes |

| <u>Concomitant Medications</u>                    |                                                                                                      |
|---------------------------------------------------|------------------------------------------------------------------------------------------------------|
| Have any medications been given since the injury? | <input type="checkbox"/> Yes – (Fill out Concomitant Medication Form)<br><input type="checkbox"/> No |

**A study of Non-Steroidal Or Opioid Analgesia Use for Children with Musculoskeletal Injuries: The No OUCH Trials**

| REB # :            | Screening ID                               | Enrolment Date               |
|--------------------|--------------------------------------------|------------------------------|
| PI: Dr. Samina Ali | _____ - _____<br>(site) (screening number) | ___/___/20___<br>dd mmm yyyy |

## Medical Oversight of Screening

|                                                                                                                                                                                         |                                                                                                                                                                                                                                                                                                                            |
|-----------------------------------------------------------------------------------------------------------------------------------------------------------------------------------------|----------------------------------------------------------------------------------------------------------------------------------------------------------------------------------------------------------------------------------------------------------------------------------------------------------------------------|
| Eligibility of the participant has been confirmed by:                                                                                                                                   | <input type="checkbox"/> PI / Site Investigator (in person)<br><input type="checkbox"/> PI / Site Investigator (by phone)<br><input type="checkbox"/> Third party physician<br><small>Purpose: to review the inclusion and exclusion criteria on this form and confirm that the patient meets the criteria listed.</small> |
| If PI/ Site Investigator, specify:<br>PI / Site Investigator Physician Name:<br>_____<br>Date and time of confirmation:<br>_____ / _____ / _____ : _____<br>dd mmm yyyy (24 hour clock) | _____<br>_____                                                                                                                                                                                                                                                                                                             |
| If Third party physician, specify:<br>Third party Physician Name:<br>_____<br>Date and time of confirmation:<br>_____ / _____ / _____ : _____<br>dd mmm yyyy (24 hour clock)            | _____<br>_____                                                                                                                                                                                                                                                                                                             |

A study of Non-Steroidal Or Opioid Analgesia Use for Children with Musculoskeletal Injuries: The No OUCH Trials

| REB # :            | Screening ID                               | Enrolment Date                   |
|--------------------|--------------------------------------------|----------------------------------|
| PI: Dr. Samina Ali | _____ - _____<br>(site) (screening number) | ___ / ___ / 20___<br>dd mmm yyyy |

## Selection of Family Preference

**To Caregiver and Child:** "At this point, we need you to tell us which study group you would like to participate in: Group 1 or Group 2. Regardless of which study you choose, you / your child will, at minimum, receive ibuprofen (Advil) for their pain. Both groups include commonly used pain medicines for this type of pain, however Group 2 includes all three of the pain medicine options offered in this study. So, if you don't have a preference, we will assign you to Group 2.

- If you choose Group 2, you/your child will have an equal chance of receiving **either**:
  - Ibuprofen (Advil) AND placebos (inactive ingredient)
  - Ibuprofen (Advil) AND acetaminophen (Tylenol)
  - Ibuprofen (Advil) AND hydromorphone (Dilaudid)
- If you choose Group 1, you/your child will have an equal chance of receiving **either**:
  - Ibuprofen (Advil) AND placebo (inactive ingredient)
  - Ibuprofen (Advil) AND acetaminophen (Tylenol)

To help you in making your choice, here is some more information about these medicines.

1. Ibuprofen (Advil) is typically provided for the kind of injury you/your child has, but it may not always be strong enough to treat a child's pain.
2. When a child needs something stronger than ibuprofen (Advil) for their pain, acetaminophen (Tylenol) and opioid medicines like hydromorphone (Dilaudid) are the most commonly recommended pain killers to be added to the ibuprofen.
3. Please remember that if you feel that you/your child needs more pain medicine at any point during the study period, you or our research nurse can let your doctor know right away.

- Which study would you like to be a part of: Group 1 or Group 2?
- [NOTE: If the family wishes to speak to a health care professional prior to making their study choice, the RA will then identify a clinical team member to aid them.]

### Indicate family preference below:

- Group 1:** Non-Opioid trial [N]
- Group 2:** Opioid trial [O]
- No preference → Proceed to enroll in  **Group 2:** Opioid trial [O]
- Family unable to reach consensus regarding preference. [If this is chosen, STOP enrolment now]

**A study of Non-Steroidal Or Opioid Analgesia Use for Children with Musculoskeletal Injuries: The No OUCH Trials**

| REB # :            | Screening ID                              | Enrolment Date                   |
|--------------------|-------------------------------------------|----------------------------------|
| PI: Dr. Samina Ali | ____ - _____<br>(site) (screening number) | ___ / ___ / 20___<br>dd mmm yyyy |

Once the **Preference Group** has been selected by the family, please retrieve the following study medication kit from your medication dispensing area:

|                                                                                                              |
|--------------------------------------------------------------------------------------------------------------|
| <p><b>Pharmacy Kit Number:</b></p> <p>____ - ____ - _____<br/>(site - preference group - patient number)</p> |
|--------------------------------------------------------------------------------------------------------------|

For peer review only

A study of Non-Steroidal Or Opioid Analgesia Use for Children with Musculoskeletal Injuries: The No OUCH Trials

| REB # :            | Study ID                                                         | Enrolment Date                      |
|--------------------|------------------------------------------------------------------|-------------------------------------|
| PI: Dr. Samina Ali | ____ - ____ - ____<br>(site - preference group - patient number) | ____ / ____ / 20____<br>dd mmm yyyy |

**Study Drugs Administration**

|                                                                                                        |                                                                                                                                                                                                                  |
|--------------------------------------------------------------------------------------------------------|------------------------------------------------------------------------------------------------------------------------------------------------------------------------------------------------------------------|
| Confirmed that the pharmacy kit is not expired?                                                        | <input type="checkbox"/> Yes<br><input type="checkbox"/> No* If “NO”, check before proceeding                                                                                                                    |
| Are the noted min. and max. temperatures of the drug storage fridge within the required ranges, today? | <input type="checkbox"/> Yes<br><input type="checkbox"/> No* If “NO”, check temperatures before proceeding                                                                                                       |
| Weight:                                                                                                | _____ kg<br><br><input type="checkbox"/> Measured on scale<br><input type="checkbox"/> Estimate provided by parent                                                                                               |
| <b>Ibuprofen (40mg/ml)</b><br><b>(up to 600 mg maximum – 15 ml maximum)</b>                            | <b>Dose: 10 mg per kg</b><br>Calculation: _____ kg x 10 = _____ mg<br><br><b>Volume: 40mg = 1 ml</b><br>Calculation: _____ mg ÷ 40mg/ml = _____ ml<br><br><b>Volume actually dispensed to patient: _____ ml</b>  |
| <b>Acetaminophen or Placebo (80mg/ml)</b><br><b>(up to 1000 mg maximum – 12.5 ml maximum)</b>          | <b>Dose: 15 mg per kg</b><br>Calculation: _____ kg x 15 = _____ mg<br><br><b>Volume: 80mg = 1 ml</b><br>Calculation: _____ mg ÷ 80 mg/kg = _____ ml<br><br><b>Volume actually dispensed to patient: _____ ml</b> |

## A study of Non-Steroidal Or Opioid Analgesia Use for Children with Musculoskeletal Injuries: The No OUCH Trials

| REB # :            | Study ID                                                         | Enrolment Date                      |
|--------------------|------------------------------------------------------------------|-------------------------------------|
| PI: Dr. Samina Ali | ____ - ____ - ____<br>(site - preference group - patient number) | ____ / ____ / 20____<br>dd mmm yyyy |

|                                                                                                                                                                        |                                                                                                                                                                                                                        |
|------------------------------------------------------------------------------------------------------------------------------------------------------------------------|------------------------------------------------------------------------------------------------------------------------------------------------------------------------------------------------------------------------|
| <b>Hydromorphone or Placebo (1mg/ml)</b><br><b>(up to 5 mg maximum – 5 ml maximum)</b><br><br><b>ONLY for participants enrolled in Group 2:</b><br><b>Opioid trial</b> | <b>Dose: 0.05 mg per kg</b><br><br>Calculation: ____ kg x 0.05 = ____ mg<br><br><b>Volume: 1 mg = 1 ml</b><br><br>Calculation: ____ mg ÷ 1 mg/ml = ____ ml<br><br><b>Volume actually dispensed to patient: ____ ml</b> |
| *Dose calculation and dispensing in syringe must be verified by a second nurse:                                                                                        | Verified by:<br>_____                                                                                                                                                                                                  |
| Date and time of study drugs administration:                                                                                                                           | ____ / ____ / ____<br>dd mmm yyyy<br><br>____ : ____<br>(24 hour clock)                                                                                                                                                |
| Has the participant taken the full dose of each syringe?                                                                                                               | <input type="checkbox"/> Yes <input type="checkbox"/> No* If " <b>NO</b> ", please comment                                                                                                                             |
| Were all study drugs administered one after the other?                                                                                                                 | <input type="checkbox"/> Yes <input type="checkbox"/> No* If " <b>NO</b> ", please comment                                                                                                                             |
| Was dispensing of the study drugs recorded on the patient's clinical chart?                                                                                            | <input type="checkbox"/> Yes <input type="checkbox"/> No* If " <b>NO</b> ", please comment                                                                                                                             |
| <u>Comments:</u><br><br><br>                                                                                                                                           |                                                                                                                                                                                                                        |

A study of Non-Steroidal Or Opioid Analgesia Use for Children with Musculoskeletal Injuries: The No OUCH Trials

| REB # :            | Study ID                                                         | Enrolment Date                    |
|--------------------|------------------------------------------------------------------|-----------------------------------|
| PI: Dr. Samina Ali | ____ - ____ - ____<br>(site - preference group - patient number) | __ / __ / 20__<br>dd / mmm / yyyy |

Evaluation # 2 (T0 – Immediately after Study Drug Administration)

Time due: dd/ mmm/ yyyy HH:MM ± 10 min

|                                                                                                                                                                                                                                                                                                                                                                                                                                                                                                                                                                                                                                                                                                                                                                                       |                                                                                                                                                                                                                           |
|---------------------------------------------------------------------------------------------------------------------------------------------------------------------------------------------------------------------------------------------------------------------------------------------------------------------------------------------------------------------------------------------------------------------------------------------------------------------------------------------------------------------------------------------------------------------------------------------------------------------------------------------------------------------------------------------------------------------------------------------------------------------------------------|---------------------------------------------------------------------------------------------------------------------------------------------------------------------------------------------------------------------------|
| Was this evaluation completed?                                                                                                                                                                                                                                                                                                                                                                                                                                                                                                                                                                                                                                                                                                                                                        | <input type="checkbox"/> Yes <input type="checkbox"/> No                                                                                                                                                                  |
| If Yes, continue. If No, specify reason:                                                                                                                                                                                                                                                                                                                                                                                                                                                                                                                                                                                                                                                                                                                                              |                                                                                                                                                                                                                           |
| <u>Date and Time of evaluation # 2:</u>                                                                                                                                                                                                                                                                                                                                                                                                                                                                                                                                                                                                                                                                                                                                               | __ / __ / __<br>dd mmm yyyy<br>: __<br>(24 hour clock)                                                                                                                                                                    |
| <u>Pain and Sedation Scores:</u><br><b>vNRS</b><br><i>“On a scale of 0 to 10, where 0 is no pain and 10 is the worst pain you can imagine, what is your pain level now?”</i><br><br><b>VAS</b><br><i>“What is your pain level on this sliding scale, where 0 means absence of pain and 100 is the worst pain you have ever experienced?”</i><br><br><b>FPS-R</b><br><i>“These faces show how much something can hurt. This face (point to left most face) shows no pain. The faces show more and more pain (point from left to right) up to this one (point to right most face) – it shows very much pain. Can you point to the face that shows how much you hurt right now?”</i><br><i>Note: say “hurt” or “pain” whichever seems right for a particular child</i><br><br><b>RSS</b> | <br>____/10<br><br>____/100 mm<br><br><input type="checkbox"/> 0 <input type="checkbox"/> 2 <input type="checkbox"/> 4<br><input type="checkbox"/> 6 <input type="checkbox"/> 8 <input type="checkbox"/> 10<br><br>____/6 |



## A study of Non-Steroidal Or Opioid Analgesia Use for Children with Musculoskeletal Injuries: The No OUCH Trials

| REB # :            | Study ID                                                         | Enrolment Date                       |
|--------------------|------------------------------------------------------------------|--------------------------------------|
| PI: Dr. Samina Ali | ____ - ____ - ____<br>(site - preference group - patient number) | ___ / ___ / 20___<br>dd / mmm / yyyy |

## Contact Information Sheet

|                                   |                                                                           |                    |
|-----------------------------------|---------------------------------------------------------------------------|--------------------|
| <b>Child's Name:</b>              | _____<br>First name                                                       | _____<br>Last name |
| <b>Age:</b>                       | _____ years                                                               |                    |
| <b>Sex:</b>                       | <input type="checkbox"/> Male <input type="checkbox"/> Female             |                    |
| <b>Caregiver's Name:</b>          | _____<br>First name                                                       | _____<br>Last name |
|                                   | Specify relationship to child: _____                                      |                    |
| <b>Preferred Mode of Contact:</b> | <input type="checkbox"/> Email <input type="checkbox"/> Phone             |                    |
| <b>Email:</b>                     | _____                                                                     |                    |
| <b>Preferred Phone Number:</b>    | ( _____ ) _____ - _____                                                   |                    |
| <b>Alternate Phone Number:</b>    | ( _____ ) _____ - _____                                                   |                    |
| <b>Time for follow up call:</b>   | <input type="checkbox"/> AM <input type="checkbox"/> PM    Specify: _____ |                    |

A study of Non-Steroidal Or Opioid Analgesia Use for Children with Musculoskeletal Injuries: The No OUCH Trials

| REB # :            | Study ID                                                         | Enrolment Date                    |
|--------------------|------------------------------------------------------------------|-----------------------------------|
| PI: Dr. Samina Ali | ____ - ____ - ____<br>(site - preference group - patient number) | __ / __ / 20__<br>dd / mmm / yyyy |

**In PED Caregiver Survey**

| Your Information                                               |                                                                                                                                                                                                                                                                                                                            |
|----------------------------------------------------------------|----------------------------------------------------------------------------------------------------------------------------------------------------------------------------------------------------------------------------------------------------------------------------------------------------------------------------|
| What is YOUR age, in years?                                    | _____ years                                                                                                                                                                                                                                                                                                                |
| What is YOUR sex?                                              | <input type="checkbox"/> Male<br><input type="checkbox"/> Female<br><input type="checkbox"/> Other, specify: _____<br><input type="checkbox"/> Decline to answer                                                                                                                                                           |
| What is your home postal code? (1 <sup>st</sup> 3 digits only) | ____                                                                                                                                                                                                                                                                                                                       |
| What is your highest level of Education?                       | <input type="checkbox"/> Elementary School<br><input type="checkbox"/> High School or some High School<br><input type="checkbox"/> Diploma/Certificate<br><input type="checkbox"/> Some Post-Secondary/University<br><input type="checkbox"/> University/Professional Degree<br><input type="checkbox"/> Decline to answer |
| What is your annual household income from all sources?         | <input type="checkbox"/> Less than or equal to \$25,000<br><input type="checkbox"/> \$25,001 to \$50,000<br><input type="checkbox"/> \$50,001 to \$75,000<br><input type="checkbox"/> \$75,000 to \$100,000<br><input type="checkbox"/> Greater than \$100,000<br><input type="checkbox"/> Decline to answer               |

| Injury Details                     |                                                                                                                                                                                                                                                                                                                                                                                                                                                                                                                                                                                                                                                           |
|------------------------------------|-----------------------------------------------------------------------------------------------------------------------------------------------------------------------------------------------------------------------------------------------------------------------------------------------------------------------------------------------------------------------------------------------------------------------------------------------------------------------------------------------------------------------------------------------------------------------------------------------------------------------------------------------------------|
| How did your child's injury occur? | <input type="checkbox"/> Motor Vehicle Collision/ Road Traffic Accident<br><input type="checkbox"/> Sports Injury <ul style="list-style-type: none"> <li><input type="checkbox"/> Ice Hockey/ Hockey</li> <li><input type="checkbox"/> Football</li> <li><input type="checkbox"/> Soccer</li> <li><input type="checkbox"/> Wrestling</li> <li><input type="checkbox"/> Basketball</li> <li><input type="checkbox"/> Gymnastics/ Cheerleading</li> <li><input type="checkbox"/> Skiing/ Snowboarding</li> <li><input type="checkbox"/> Biking</li> <li><input type="checkbox"/> Other sport, specify: _____</li> </ul> <input type="checkbox"/> Trampoline |

**A study of Non-Steroidal Or Opioid Analgesia Use for Children with Musculoskeletal Injuries: The No OUCH Trials**

| REB # :            | Study ID                                                         | Enrolment Date                |
|--------------------|------------------------------------------------------------------|-------------------------------|
| PI: Dr. Samina Ali | ____ - ____ - ____<br>(site - preference group - patient number) | __ / __ / 20__<br>dd mmm yyyy |

|                                                                                                        |                                                                                                                                                                                                                                                                                              |
|--------------------------------------------------------------------------------------------------------|----------------------------------------------------------------------------------------------------------------------------------------------------------------------------------------------------------------------------------------------------------------------------------------------|
|                                                                                                        | <input type="checkbox"/> Other play or activity<br><input type="checkbox"/> Other Slip, Trip or Fall<br><input type="checkbox"/> Other mechanism, specify: _____                                                                                                                             |
| Was the sports, play or activity supervised (ie. Were you or another adult there watching your child)? | <input type="checkbox"/> Yes<br><input type="checkbox"/> No<br><input type="checkbox"/> Unsure                                                                                                                                                                                               |
| Where did your child's injury occur?                                                                   | <input type="checkbox"/> Sports Field/ Arena<br><input type="checkbox"/> In School/ School playground<br><input type="checkbox"/> Playground/ Park<br><input type="checkbox"/> Home/ Friend's home<br><input type="checkbox"/> Road<br><input type="checkbox"/> Other, please specify: _____ |

| Study Preference                                                                                                                                                                                                                                                                                                                                                                       |                                                                                                                                                                                                                                                                                                                                                                                                                                                                                                                                                                                                                                                                                                           |
|----------------------------------------------------------------------------------------------------------------------------------------------------------------------------------------------------------------------------------------------------------------------------------------------------------------------------------------------------------------------------------------|-----------------------------------------------------------------------------------------------------------------------------------------------------------------------------------------------------------------------------------------------------------------------------------------------------------------------------------------------------------------------------------------------------------------------------------------------------------------------------------------------------------------------------------------------------------------------------------------------------------------------------------------------------------------------------------------------------------|
| <p>If they chose the Non-Opioid trial (Group 1):</p> <p>Please tell us your reason(s) for choosing <b>Group 1</b>, ie. the study with the possibility of receiving one of the following:</p> <ul style="list-style-type: none"> <li>○ Ibuprofen only (Advil)</li> <li>○ Ibuprofen (Advil) and Acetaminophen (Tylenol)</li> </ul> <p><i>Choose all that apply</i></p>                   | <input type="checkbox"/> I do not believe my child's pain is/ will be severe enough to require an opioid medicine (Hydromorphone/ Dilaudid)<br><input type="checkbox"/> I did not want my child to receive an opioid medicine<br><input type="checkbox"/> I do not think my child is old enough to receive an opioid medicine<br><input type="checkbox"/> I trust that both medicines in this study would work for my child, with their current level of pain<br><input type="checkbox"/> I think my child will get better care if they are a part of this study (ex. they will get treated faster, get close care from the research nurse etc.)<br><input type="checkbox"/> Other, please specify: _____ |
| <p>If they chose the Opioid trial (Group 2):</p> <p>Please tell us your reason(s) for choosing <b>Group 2</b>, ie. the study with the possibility of receiving one of the following:</p> <ul style="list-style-type: none"> <li>○ Ibuprofen only (Advil)</li> <li>○ Ibuprofen (Advil) and Acetaminophen (Tylenol)</li> <li>○ Ibuprofen (Advil) and Hydromorphone (Dilaudid)</li> </ul> | <input type="checkbox"/> I wanted to have the option of all 3 medicines, or combination of medicines, available to us<br><input type="checkbox"/> I wanted/hoped that my child will receive the opioid medicine (Hydromorphone/ Dilaudid) specifically<br><input type="checkbox"/> I believe that my child's pain is/ will be severe enough to require an opioid medicine<br><input type="checkbox"/> I believe that the pain relief benefits of the opioid medicine are greater than any possible side effects<br><input type="checkbox"/> I trust that any of the 3 options in this study would work for my child, with their current level of pain                                                     |

**A study of Non-Steroidal Or Opioid Analgesia Use for Children with Musculoskeletal Injuries: The No OUCH Trials**

| REB # :            | Study ID                                                         | Enrolment Date                    |
|--------------------|------------------------------------------------------------------|-----------------------------------|
| PI: Dr. Samina Ali | ____ - ____ - ____<br>(site - preference group - patient number) | __ / __ / 20__<br>dd / mmm / yyyy |

|                                     |                                                                                                                                                                                                                                                                                                                                                                                                                        |
|-------------------------------------|------------------------------------------------------------------------------------------------------------------------------------------------------------------------------------------------------------------------------------------------------------------------------------------------------------------------------------------------------------------------------------------------------------------------|
| <p><i>Choose all that apply</i></p> | <input type="checkbox"/> I think my child will get better care if they are a part of this study (ex. they will get treated faster, get close care from the research nurse etc.)<br><input type="checkbox"/> Participating in this study will help researchers learn more about the use of opioids for treating injury-related pain for children in the future<br><input type="checkbox"/> Other, please specify: _____ |
|-------------------------------------|------------------------------------------------------------------------------------------------------------------------------------------------------------------------------------------------------------------------------------------------------------------------------------------------------------------------------------------------------------------------------------------------------------------------|

| <b>Experience with Opioid Pain Medicines</b>                                                                                                                                                                                                                         |                                                                                                                                              |
|----------------------------------------------------------------------------------------------------------------------------------------------------------------------------------------------------------------------------------------------------------------------|----------------------------------------------------------------------------------------------------------------------------------------------|
| Have YOU ever been prescribed or given an opioid medicine by a health care provider, in a clinic or hospital?<br><br><i>Ex. Hydromorphone (Dilaudid), Morphine, Oxycodone (OxyContin, Percocet), Codeine, Fentanyl, Hydrocodone (Vicodin)</i>                        | <input type="checkbox"/> Yes<br><input type="checkbox"/> No<br><input type="checkbox"/> Unsure                                               |
| Have any of your FAMILY MEMBERS ever been prescribed or given an opioid medicine by a health care provider, in a clinic or hospital?<br><br><i>Ex. Hydromorphone (Dilaudid), Morphine, Oxycodone (OxyContin, Percocet), Codeine, Fentanyl, Hydrocodone (Vicodin)</i> | <input type="checkbox"/> Yes<br><input type="checkbox"/> No<br><input type="checkbox"/> Unsure                                               |
| If yes, was this family member a CHILD?                                                                                                                                                                                                                              | <input type="checkbox"/> Yes<br><input type="checkbox"/> No<br><input type="checkbox"/> Decline to Answer                                    |
| Have you or a family member ever been diagnosed with a substance use disorder, or addiction to drugs/ alcohol?                                                                                                                                                       | <input type="checkbox"/> Yes<br><input type="checkbox"/> No<br><input type="checkbox"/> Unsure<br><input type="checkbox"/> Decline to answer |
| If yes, can you please specify which drug(s)/ substances?                                                                                                                                                                                                            | [Free text]                                                                                                                                  |

## A study of Non-Steroidal Or Opioid Analgesia Use for Children with Musculoskeletal Injuries: The No OUCH Trials

| REB # :            | Study ID                                                         | Enrolment Date                       |
|--------------------|------------------------------------------------------------------|--------------------------------------|
| PI: Dr. Samina Ali | ____ - ____ - ____<br>(site - preference group - patient number) | ___ / ___ / 20___<br>dd / mmm / yyyy |

## Evaluation # 3 (T30 – 30 minutes after study drugs administration)

Time due: dd/ mmm/ yyyy HH:MM ± 15 min

|                                                                                                                                                                                                                                                                                                                                                                                                                                                                                                                                                                                                                                                                                                                                                           |                                                                                                                                                                                                                          |
|-----------------------------------------------------------------------------------------------------------------------------------------------------------------------------------------------------------------------------------------------------------------------------------------------------------------------------------------------------------------------------------------------------------------------------------------------------------------------------------------------------------------------------------------------------------------------------------------------------------------------------------------------------------------------------------------------------------------------------------------------------------|--------------------------------------------------------------------------------------------------------------------------------------------------------------------------------------------------------------------------|
| Was this evaluation completed?                                                                                                                                                                                                                                                                                                                                                                                                                                                                                                                                                                                                                                                                                                                            | <input type="checkbox"/> Yes <input type="checkbox"/> No                                                                                                                                                                 |
| If Yes, continue. If No, specify reason:                                                                                                                                                                                                                                                                                                                                                                                                                                                                                                                                                                                                                                                                                                                  | <input type="checkbox"/> Patient discharged before specified evaluation time<br><input type="checkbox"/> Other: _____                                                                                                    |
| <u>Date and Time of evaluation # 3:</u>                                                                                                                                                                                                                                                                                                                                                                                                                                                                                                                                                                                                                                                                                                                   | ___ / ___ / ___<br>dd / mmm / yyyy<br>_____<br>:_____<br>(24 hour clock)                                                                                                                                                 |
| <u>Vital Signs:</u>                                                                                                                                                                                                                                                                                                                                                                                                                                                                                                                                                                                                                                                                                                                                       | HR: _____ bpm<br>RR: _____ rpm<br>Sat: _____ %<br>BP: _____ / _____ mmHg                                                                                                                                                 |
| <u>Pain and Sedation Scores:</u><br><b>vNRS</b><br>"On a scale of 0 to 10, where 0 is no pain and 10 is the worst pain you can imagine, what is your pain level now?"<br><br><b>VAS</b><br>"What is your pain level on this sliding scale, where 0 means absence of pain and 100 is the worst pain you have ever experienced?"<br><br><b>FPS-R</b><br>"These faces show how much something can hurt. This face (point to left most face) shows no pain. The faces show more and more pain (point from left to right) up to this one (point to right most face) – it shows very much pain. Can you point to the face that shows how much you hurt right now?"<br>Note: say "hurt" or "pain" whichever seems right for a particular child<br><br><b>RSS</b> | _____/10<br><br>_____/100 mm<br><br><input type="checkbox"/> 0 <input type="checkbox"/> 2 <input type="checkbox"/> 4<br><input type="checkbox"/> 6 <input type="checkbox"/> 8 <input type="checkbox"/> 10<br><br>_____/6 |
| <u>Any adverse events or side effects?</u><br>If "YES", complete a separate entry for each AE on the AE Form. Do not suggest any AEs to the participant; let him/ her answer spontaneously.                                                                                                                                                                                                                                                                                                                                                                                                                                                                                                                                                               | <input type="checkbox"/> Yes – (Fill out Adverse Events Form)<br><input type="checkbox"/> No                                                                                                                             |

A study of Non-Steroidal Or Opioid Analgesia Use for Children with Musculoskeletal Injuries: The No OUCH Trials

| REB # :            | Study ID                                                         | Enrolment Date                       |
|--------------------|------------------------------------------------------------------|--------------------------------------|
| PI: Dr. Samina Ali | ____ - ____ - ____<br>(site - preference group - patient number) | ___ / ___ / 20___<br>dd / mmm / yyyy |

Evaluation # 4 (T60 – 60 minutes after study drugs administration)

Time due: dd/ mmm/ yyyy HH:MM ± 15 min

|                                                                                                                                                                                                                                                                                                                                                                                                                                                                                                                                                                                                                                                                                                                                                           |                                                                                                                                                                                                                          |
|-----------------------------------------------------------------------------------------------------------------------------------------------------------------------------------------------------------------------------------------------------------------------------------------------------------------------------------------------------------------------------------------------------------------------------------------------------------------------------------------------------------------------------------------------------------------------------------------------------------------------------------------------------------------------------------------------------------------------------------------------------------|--------------------------------------------------------------------------------------------------------------------------------------------------------------------------------------------------------------------------|
| Was this evaluation completed?                                                                                                                                                                                                                                                                                                                                                                                                                                                                                                                                                                                                                                                                                                                            | <input type="checkbox"/> Yes <input type="checkbox"/> No                                                                                                                                                                 |
| If Yes, continue. If No, specify reason:                                                                                                                                                                                                                                                                                                                                                                                                                                                                                                                                                                                                                                                                                                                  | <input type="checkbox"/> Patient discharged before specified evaluation time<br><input type="checkbox"/> Other: _____                                                                                                    |
| <u>Date and Time of evaluation # 4:</u>                                                                                                                                                                                                                                                                                                                                                                                                                                                                                                                                                                                                                                                                                                                   | ___ / ___ / ___<br>dd / mmm / yyyy<br>____ : ____<br>(24 hour clock)                                                                                                                                                     |
| <u>Vital Signs:</u>                                                                                                                                                                                                                                                                                                                                                                                                                                                                                                                                                                                                                                                                                                                                       | HR: _____ bpm<br>RR: _____ rpm<br>Sat: _____ %<br>BP: _____ / _____ mmHg                                                                                                                                                 |
| <u>Pain and Sedation Scores:</u><br><b>vNRS</b><br>“On a scale of 0 to 10, where 0 is no pain and 10 is the worst pain you can imagine, what is your pain level now?”<br><br><b>VAS</b><br>“What is your pain level on this sliding scale, where 0 means absence of pain and 100 is the worst pain you have ever experienced?”<br><br><b>FPS-R</b><br>“These faces show how much something can hurt. This face (point to left most face) shows no pain. The faces show more and more pain (point from left to right) up to this one (point to right most face) – it shows very much pain. Can you point to the face that shows how much you hurt right now?”<br>Note: say “hurt” or “pain” whichever seems right for a particular child<br><br><b>RSS</b> | _____/10<br><br>_____/100 mm<br><br><input type="checkbox"/> 0 <input type="checkbox"/> 2 <input type="checkbox"/> 4<br><input type="checkbox"/> 6 <input type="checkbox"/> 8 <input type="checkbox"/> 10<br><br>_____/6 |
| <u>Any adverse events or side effects?</u><br>If “YES”, complete a separate entry for each AE on the AE Form. Do not suggest any AEs to the participant; let him/ her answer spontaneously.                                                                                                                                                                                                                                                                                                                                                                                                                                                                                                                                                               | <input type="checkbox"/> Yes – (Fill out Adverse Events Form)<br><input type="checkbox"/> No                                                                                                                             |

## A study of Non-Steroidal Or Opioid Analgesia Use for Children with Musculoskeletal Injuries: The No OUCH Trials

| REB # :            | Study ID                                                         | Enrolment Date                       |
|--------------------|------------------------------------------------------------------|--------------------------------------|
| PI: Dr. Samina Ali | ____ - ____ - ____<br>(site - preference group - patient number) | ___ / ___ / 20___<br>dd / mmm / yyyy |

## Evaluation # 5 (T90 – 90 minutes after study drugs administration)

Time due: dd/ mmm/ yyyy HH:MM ± 15 min

|                                                                                                                                                                                                                                                                                                                                                                                                                                                                                                                                                                                                                                                                                                                                                           |                                                                                                                                                                                                                          |
|-----------------------------------------------------------------------------------------------------------------------------------------------------------------------------------------------------------------------------------------------------------------------------------------------------------------------------------------------------------------------------------------------------------------------------------------------------------------------------------------------------------------------------------------------------------------------------------------------------------------------------------------------------------------------------------------------------------------------------------------------------------|--------------------------------------------------------------------------------------------------------------------------------------------------------------------------------------------------------------------------|
| Was this evaluation completed?                                                                                                                                                                                                                                                                                                                                                                                                                                                                                                                                                                                                                                                                                                                            | <input type="checkbox"/> Yes <input type="checkbox"/> No                                                                                                                                                                 |
| If Yes, continue. If No, specify reason:                                                                                                                                                                                                                                                                                                                                                                                                                                                                                                                                                                                                                                                                                                                  | <input type="checkbox"/> Patient discharged before specified evaluation time<br><input type="checkbox"/> Other: _____                                                                                                    |
| <u>Date and Time of evaluation # 5:</u>                                                                                                                                                                                                                                                                                                                                                                                                                                                                                                                                                                                                                                                                                                                   | ___ / ___ / ___<br>dd / mmm / yyyy<br>_____<br>:_____<br>(24 hour clock)                                                                                                                                                 |
| <u>Vital Signs:</u>                                                                                                                                                                                                                                                                                                                                                                                                                                                                                                                                                                                                                                                                                                                                       | HR: _____ bpm<br>RR: _____ rpm<br>Sat: _____ %<br>BP: ____ / ____ mmHg                                                                                                                                                   |
| <u>Pain and Sedation Scores:</u><br><b>vNRS</b><br>"On a scale of 0 to 10, where 0 is no pain and 10 is the worst pain you can imagine, what is your pain level now?"<br><br><b>VAS</b><br>"What is your pain level on this sliding scale, where 0 means absence of pain and 100 is the worst pain you have ever experienced?"<br><br><b>FPS-R</b><br>"These faces show how much something can hurt. This face (point to left most face) shows no pain. The faces show more and more pain (point from left to right) up to this one (point to right most face) – it shows very much pain. Can you point to the face that shows how much you hurt right now?"<br>Note: say "hurt" or "pain" whichever seems right for a particular child<br><br><b>RSS</b> | _____/10<br><br>_____/100 mm<br><br><input type="checkbox"/> 0 <input type="checkbox"/> 2 <input type="checkbox"/> 4<br><input type="checkbox"/> 6 <input type="checkbox"/> 8 <input type="checkbox"/> 10<br><br>_____/6 |
| <u>Any adverse events or side effects?</u><br>If "YES", complete a separate entry for each AE on the AE Form. Do not suggest any AEs to the participant; let him/ her answer spontaneously.                                                                                                                                                                                                                                                                                                                                                                                                                                                                                                                                                               | <input type="checkbox"/> Yes – (Fill out Adverse Events Form)<br><input type="checkbox"/> No                                                                                                                             |

A study of Non-Steroidal Or Opioid Analgesia Use for Children with Musculoskeletal Injuries: The No OUCH Trials

| REB # :            | Study ID                                                         | Enrolment Date                    |
|--------------------|------------------------------------------------------------------|-----------------------------------|
| PI: Dr. Samina Ali | ____ - ____ - ____<br>(site - preference group - patient number) | __ / __ / 20__<br>dd / mmm / yyyy |

**Evaluation # 6 (T120 – 120 minutes after study drugs administration)**

Time due: dd/ mmm/ yyyy HH:MM ± 15 min

|                                                                                                                                                                                                                                                                                                                                                                                                                                                                                                                                                                                                                                                                                                                                                           |                                                                                                                                                                                                                          |
|-----------------------------------------------------------------------------------------------------------------------------------------------------------------------------------------------------------------------------------------------------------------------------------------------------------------------------------------------------------------------------------------------------------------------------------------------------------------------------------------------------------------------------------------------------------------------------------------------------------------------------------------------------------------------------------------------------------------------------------------------------------|--------------------------------------------------------------------------------------------------------------------------------------------------------------------------------------------------------------------------|
| Was this evaluation completed?                                                                                                                                                                                                                                                                                                                                                                                                                                                                                                                                                                                                                                                                                                                            | <input type="checkbox"/> Yes <input type="checkbox"/> No                                                                                                                                                                 |
| If Yes, continue. If No, specify reason:                                                                                                                                                                                                                                                                                                                                                                                                                                                                                                                                                                                                                                                                                                                  | <input type="checkbox"/> Patient discharged before specified evaluation time<br><input type="checkbox"/> Other: _____                                                                                                    |
| <u>Date and Time of evaluation # 6:</u>                                                                                                                                                                                                                                                                                                                                                                                                                                                                                                                                                                                                                                                                                                                   | __ / __ / __<br>dd / mmm / yyyy<br>____ : ____<br>(24 hour clock)                                                                                                                                                        |
| <u>Vital Signs:</u>                                                                                                                                                                                                                                                                                                                                                                                                                                                                                                                                                                                                                                                                                                                                       | HR: _____ bpm<br>RR: _____ rpm<br>Sat: _____ %<br>BP: ____ / ____ mmHg                                                                                                                                                   |
| <u>Pain and Sedation Scores:</u><br><b>vNRS</b><br>"On a scale of 0 to 10, where 0 is no pain and 10 is the worst pain you can imagine, what is your pain level now?"<br><br><b>VAS</b><br>"What is your pain level on this sliding scale, where 0 means absence of pain and 100 is the worst pain you have ever experienced?"<br><br><b>FPS-R</b><br>"These faces show how much something can hurt. This face (point to left most face) shows no pain. The faces show more and more pain (point from left to right) up to this one (point to right most face) – it shows very much pain. Can you point to the face that shows how much you hurt right now?"<br>Note: say "hurt" or "pain" whichever seems right for a particular child<br><br><b>RSS</b> | _____/10<br><br>_____/100 mm<br><br><input type="checkbox"/> 0 <input type="checkbox"/> 2 <input type="checkbox"/> 4<br><input type="checkbox"/> 6 <input type="checkbox"/> 8 <input type="checkbox"/> 10<br><br>_____/6 |
| <u>Any adverse events or side effects?</u><br>If "YES", complete a separate entry for each AE on the AE Form. Do not suggest any AEs to the participant; let him/ her answer spontaneously.                                                                                                                                                                                                                                                                                                                                                                                                                                                                                                                                                               | <input type="checkbox"/> Yes – (Fill out Adverse Events Form)<br><input type="checkbox"/> No                                                                                                                             |



## A study of Non-Steroidal Or Opioid Analgesia Use for Children with Musculoskeletal Injuries: The No OUCH Trials

| REB # :            | Study ID                                                            | Enrolment Date                       |
|--------------------|---------------------------------------------------------------------|--------------------------------------|
| PI: Dr. Samina Ali | _____ - _____ - _____<br>(site - preference group - patient number) | ___ / ___ / 20___<br>dd / mmm / yyyy |

## Evaluation # 7 (TME, Time of Medical Examination)

|                                                                                                                                                                                                                                                                                                                                                                                                   |                                                                                                                                                                                  |
|---------------------------------------------------------------------------------------------------------------------------------------------------------------------------------------------------------------------------------------------------------------------------------------------------------------------------------------------------------------------------------------------------|----------------------------------------------------------------------------------------------------------------------------------------------------------------------------------|
| Was this evaluation completed?                                                                                                                                                                                                                                                                                                                                                                    | <input type="checkbox"/> Yes <input type="checkbox"/> No                                                                                                                         |
| If Yes, continue. If No, specify reason:                                                                                                                                                                                                                                                                                                                                                          |                                                                                                                                                                                  |
| <u>Date and Time of medical exam:</u>                                                                                                                                                                                                                                                                                                                                                             | ___ / ___ / ___<br>dd / mmm / yyyy<br>____ : ____<br>(24 hour clock)                                                                                                             |
| <u>Vital Signs:</u>                                                                                                                                                                                                                                                                                                                                                                               | HR: _____ bpm<br>RR: _____ rpm<br>Sat: _____ %<br>BP: _____ / _____ mmHg                                                                                                         |
| <u>Pain and Sedation Scores:</u>                                                                                                                                                                                                                                                                                                                                                                  |                                                                                                                                                                                  |
| <b>vNRS</b><br>"On a scale of 0 to 10, where 0 is no pain and 10 is the worst pain you can imagine, what is your pain level now?"                                                                                                                                                                                                                                                                 | _____/10                                                                                                                                                                         |
| <b>VAS</b><br>"What is your pain level on this sliding scale, where 0 means absence of pain and 100 is the worst pain you have ever experienced?"                                                                                                                                                                                                                                                 | _____/100 mm                                                                                                                                                                     |
| <b>FPS-R</b><br>"These faces show how much something can hurt. This face (point to left most face) shows no pain. The faces show more and more pain (point from left to right) up to this one (point to right most face) – it shows very much pain. Can you point to the face that shows how much you hurt right now?"<br>Note: say "hurt" or "pain" whichever seems right for a particular child | <input type="checkbox"/> 0 <input type="checkbox"/> 2 <input type="checkbox"/> 4<br><input type="checkbox"/> 6 <input type="checkbox"/> 8 <input type="checkbox"/> 10<br>_____/6 |
| <b>RSS</b>                                                                                                                                                                                                                                                                                                                                                                                        |                                                                                                                                                                                  |
| <u>Any adverse events or side effects?</u><br>If "YES", complete a separate entry for each AE on the AE Form. Do not suggest any AEs to the participant; let him/ her answer spontaneously.                                                                                                                                                                                                       | <input type="checkbox"/> Yes – (Fill out Adverse Events Form)<br><input type="checkbox"/> No                                                                                     |

A study of Non-Steroidal Or Opioid Analgesia Use for Children with Musculoskeletal Injuries: The No OUCH Trials

| REB # :            | Study ID                                                         | Enrolment Date                       |
|--------------------|------------------------------------------------------------------|--------------------------------------|
| PI: Dr. Samina Ali | ____ - ____ - ____<br>(site - preference group - patient number) | ___ / ___ / 20___<br>dd / mmm / yyyy |

**Evaluation # 8 (TXR – Time following X-Ray procedure +/- 30 minutes)**

|                                                                                                                                                                                                                                                                                                                                                                                                   |                                                                                                                                                                       |
|---------------------------------------------------------------------------------------------------------------------------------------------------------------------------------------------------------------------------------------------------------------------------------------------------------------------------------------------------------------------------------------------------|-----------------------------------------------------------------------------------------------------------------------------------------------------------------------|
| Did the patient have an X-ray?                                                                                                                                                                                                                                                                                                                                                                    | <input type="checkbox"/> Yes <input type="checkbox"/> No                                                                                                              |
| If Yes, Was the post- X-ray evaluation completed?                                                                                                                                                                                                                                                                                                                                                 | <input type="checkbox"/> Yes <input type="checkbox"/> No                                                                                                              |
| If Yes, continue. If No, specify reason:                                                                                                                                                                                                                                                                                                                                                          |                                                                                                                                                                       |
| <u>Date and Time of X-ray:</u>                                                                                                                                                                                                                                                                                                                                                                    | ___ / ___ / ___<br>dd / mmm / yyyy<br>:<br>(24 hour clock)                                                                                                            |
| <u>Date and Time of evaluation # 8:</u>                                                                                                                                                                                                                                                                                                                                                           | ___ / ___ / ___<br>dd / mmm / yyyy<br>:<br>(24 hour clock)                                                                                                            |
| <u>Vital Signs:</u>                                                                                                                                                                                                                                                                                                                                                                               | HR: _____ bpm<br>RR: _____ rpm<br>Sat: _____ %<br>BP: _____ / _____ mmHg                                                                                              |
| <u>Pain and Sedation Scores:</u>                                                                                                                                                                                                                                                                                                                                                                  |                                                                                                                                                                       |
| <b>vNRS</b><br>"On a scale of 0 to 10, where 0 is no pain and 10 is the worst pain you can imagine, what is your pain level now?"                                                                                                                                                                                                                                                                 | _____/10                                                                                                                                                              |
| <b>VAS</b><br>"What is your pain level on this sliding scale, where 0 means absence of pain and 100 is the worst pain you have ever experienced?"                                                                                                                                                                                                                                                 | _____/100 mm                                                                                                                                                          |
| <b>FPS-R</b><br>"These faces show how much something can hurt. This face (point to left most face) shows no pain. The faces show more and more pain (point from left to right) up to this one (point to right most face) – it shows very much pain. Can you point to the face that shows how much you hurt right now?"<br>Note: say "hurt" or "pain" whichever seems right for a particular child | <input type="checkbox"/> 0 <input type="checkbox"/> 2 <input type="checkbox"/> 4<br><input type="checkbox"/> 6 <input type="checkbox"/> 8 <input type="checkbox"/> 10 |
| <b>RSS</b>                                                                                                                                                                                                                                                                                                                                                                                        | _____/6                                                                                                                                                               |

1  
2  
3  
4  
5  
6  
7  
8  
9  
10  
11  
12  
13  
14  
15  
16  
17  
18  
19  
20  
21  
22  
23  
24  
25  
26  
27  
28  
29  
30  
31  
32  
33  
34  
35  
36  
37  
38  
39  
40  
41  
42  
43  
44  
45  
46  
47  
48  
49  
50  
51  
52  
53  
54  
55  
56  
57  
58  
59  
60

**A study of Non-Steroidal Or Opioid Analgesia Use for Children with Musculoskeletal Injuries: The No OUCH Trials**

| REB # :            | Study ID                                                                                             | Enrolment Date                                                    |
|--------------------|------------------------------------------------------------------------------------------------------|-------------------------------------------------------------------|
| PI: Dr. Samina Ali | <p style="text-align: center;">____ - ____ - ____<br/>(site - preference group - patient number)</p> | <p style="text-align: center;">__ / __ / 20__<br/>dd mmm yyyy</p> |

|                                                                                                                                                                                                            |                                                                                                  |
|------------------------------------------------------------------------------------------------------------------------------------------------------------------------------------------------------------|--------------------------------------------------------------------------------------------------|
| <p><u>Any adverse events or side effects?</u><br/><i>If "YES", complete a separate entry for each AE on the AE Form. Do not suggest any AEs to the participant; let him/ her answer spontaneously.</i></p> | <input type="checkbox"/> Yes – (Fill out Adverse Events Form)<br><br><input type="checkbox"/> No |
|------------------------------------------------------------------------------------------------------------------------------------------------------------------------------------------------------------|--------------------------------------------------------------------------------------------------|

For peer review only

A study of Non-Steroidal Or Opioid Analgesia Use for Children with Musculoskeletal Injuries: The No OUCH Trials

| REB # :            | Study ID                                                         | Enrolment Date                    |
|--------------------|------------------------------------------------------------------|-----------------------------------|
| PI: Dr. Samina Ali | ____ - ____ - ____<br>(site - preference group - patient number) | __ / __ / 20__<br>dd / mmm / yyyy |

**ED Discharge Evaluation**

| <b>ED Discharge Evaluation (To be done <u>only</u> if discharged before 120 minutes)</b>                                                                                                                                                                                                                                                                                                          |                                                                                                                                                                       |
|---------------------------------------------------------------------------------------------------------------------------------------------------------------------------------------------------------------------------------------------------------------------------------------------------------------------------------------------------------------------------------------------------|-----------------------------------------------------------------------------------------------------------------------------------------------------------------------|
| Was the patient discharged before 120 minutes?                                                                                                                                                                                                                                                                                                                                                    | <input type="checkbox"/> Yes <input type="checkbox"/> No                                                                                                              |
| If Yes, Was this evaluation completed?                                                                                                                                                                                                                                                                                                                                                            | <input type="checkbox"/> Yes <input type="checkbox"/> No                                                                                                              |
| If Yes, continue. If No, specify reason:                                                                                                                                                                                                                                                                                                                                                          |                                                                                                                                                                       |
| <u>Date and Time of ED Discharge:</u>                                                                                                                                                                                                                                                                                                                                                             | ____ / ____ / ____<br>dd mmm yyyy<br>____ : ____<br>(24 hour clock)                                                                                                   |
| <u>Vital Signs:</u>                                                                                                                                                                                                                                                                                                                                                                               | HR: _____ bpm<br>RR: _____ rpm<br>Sat: _____ %<br>BP: ____ / ____ mmHg                                                                                                |
| <u>Pain and Sedation Scores:</u>                                                                                                                                                                                                                                                                                                                                                                  |                                                                                                                                                                       |
| <b>vNRS</b><br>"On a scale of 0 to 10, where 0 is no pain and 10 is the worst pain you can imagine, what is your pain level now?"                                                                                                                                                                                                                                                                 | _____/10                                                                                                                                                              |
| <b>VAS</b><br>"What is your pain level on this sliding scale, where 0 means absence of pain and 100 is the worst pain you have ever experienced?"                                                                                                                                                                                                                                                 | _____/100 mm                                                                                                                                                          |
| <b>FPS-R</b><br>"These faces show how much something can hurt. This face (point to left most face) shows no pain. The faces show more and more pain (point from left to right) up to this one (point to right most face) – it shows very much pain. Can you point to the face that shows how much you hurt right now?"<br>Note: say "hurt" or "pain" whichever seems right for a particular child | <input type="checkbox"/> 0 <input type="checkbox"/> 2 <input type="checkbox"/> 4<br><input type="checkbox"/> 6 <input type="checkbox"/> 8 <input type="checkbox"/> 10 |
| <b>RSS</b>                                                                                                                                                                                                                                                                                                                                                                                        | _____/6                                                                                                                                                               |
| <u>Any adverse events or side effects?</u><br>If "YES", complete a separate entry for each AE on the AE Form. Do not suggest any AEs to the participant; let him/ her answer spontaneously.                                                                                                                                                                                                       | <input type="checkbox"/> Yes – (Fill out Adverse Events Form)<br><input type="checkbox"/> No                                                                          |

**A study of Non-Steroidal Or Opioid Analgesia Use for Children with Musculoskeletal Injuries: The No OUCH Trials**

| REB # :            | Study ID                                                            | Enrolment Date                             |
|--------------------|---------------------------------------------------------------------|--------------------------------------------|
| PI: Dr. Samina Ali | _____ - _____ - _____<br>(site - preference group - patient number) | ___ / ___ / 20___<br>dd      mmm      yyyy |

|                               |                                                                                                                                                                                                                                                                                     |
|-------------------------------|-------------------------------------------------------------------------------------------------------------------------------------------------------------------------------------------------------------------------------------------------------------------------------------|
| Reason for early termination? | <input type="checkbox"/> Procedural sedation used for a reduction*<br><input type="checkbox"/> Left ED prior to evaluation<br><input type="checkbox"/> Left without being seen<br><input type="checkbox"/> Other, please specify<br>_____<br>* Fill out Concomitant Medication Form |
|-------------------------------|-------------------------------------------------------------------------------------------------------------------------------------------------------------------------------------------------------------------------------------------------------------------------------------|

For peer review only

A study of Non-Steroidal Or Opioid Analgesia Use for Children with Musculoskeletal Injuries: The No OUCH Trials

| REB # :            | Study ID                                                         | Enrolment Date                    |
|--------------------|------------------------------------------------------------------|-----------------------------------|
| PI: Dr. Samina Ali | ____ - ____ - ____<br>(site - preference group - patient number) | __ / __ / 20__<br>dd / mmm / yyyy |

## PRE-Discharge Questions

| Question for Research Nurse                                                          |                                                                                                                                                            |
|--------------------------------------------------------------------------------------|------------------------------------------------------------------------------------------------------------------------------------------------------------|
| Which drug, or combination of drugs, do you think the child received for this study? | <input type="checkbox"/> Ibuprofen alone or<br><input type="checkbox"/> Ibuprofen + Acetaminophen or<br><input type="checkbox"/> Ibuprofen + Hydromorphone |

| Questions for Parent/ Caregiver                                                                                    |                                                                                                                                                                                                                            |
|--------------------------------------------------------------------------------------------------------------------|----------------------------------------------------------------------------------------------------------------------------------------------------------------------------------------------------------------------------|
| Which drug, or combination of drugs, do you (parent/ caregiver) think your child received for this study?          | <input type="checkbox"/> Ibuprofen alone or<br><input type="checkbox"/> Ibuprofen + Acetaminophen or<br><input type="checkbox"/> Ibuprofen + Hydromorphone                                                                 |
| How do you feel about the pain treatment provided by the study medicine today?                                     | <input type="checkbox"/> Very Satisfied<br><input type="checkbox"/> Somewhat Satisfied<br><input type="checkbox"/> Neutral<br><input type="checkbox"/> Somewhat dissatisfied<br><input type="checkbox"/> Very dissatisfied |
| Do you feel that that the medicines that your child received provided adequate/ enough pain relief for your child? | <input type="checkbox"/> Yes<br><input type="checkbox"/> No<br><input type="checkbox"/> Unsure                                                                                                                             |
| Would you accept the same medicine for your child, in the unlikely event of a similar injury in the future?        | <input type="checkbox"/> Yes<br><input type="checkbox"/> No<br><input type="checkbox"/> Unsure                                                                                                                             |
| Why? Why Not?                                                                                                      | Free Text                                                                                                                                                                                                                  |

| Questions for Child                                                       |                                                                                                                                                                                                  |
|---------------------------------------------------------------------------|--------------------------------------------------------------------------------------------------------------------------------------------------------------------------------------------------|
| How happy were you with the pain treatment from the study medicine today? | <input type="checkbox"/> Very happy<br><input type="checkbox"/> Somewhat happy<br><input type="checkbox"/> Neutral<br><input type="checkbox"/> Somewhat sad<br><input type="checkbox"/> Very sad |
| Would you take the same medicine if you had the same injury again?        | <input type="checkbox"/> Yes<br><input type="checkbox"/> No                                                                                                                                      |

1  
2  
3  
4  
5  
6  
7  
8  
9  
10  
11  
12  
13  
14  
15  
16  
17  
18  
19  
20  
21  
22  
23  
24  
25  
26  
27  
28  
29  
30  
31  
32  
33  
34  
35  
36  
37  
38  
39  
40  
41  
42  
43  
44  
45  
46  
47  
48  
49  
50  
51  
52  
53  
54  
55  
56  
57  
58  
59  
60

**A study of Non-Steroidal Or Opioid Analgesia Use for Children with Musculoskeletal Injuries: The No OUCH Trials**

| REB # :            | Study ID                                                            | Enrolment Date                       |
|--------------------|---------------------------------------------------------------------|--------------------------------------|
| PI: Dr. Samina Ali | _____ - _____ - _____<br>(site - preference group - patient number) | ___ / ___ / 20___<br>dd / mmm / yyyy |

|               |                                 |
|---------------|---------------------------------|
|               | <input type="checkbox"/> Unsure |
| Why? Why Not? | Free Text                       |

For peer review only

A study of Non-Steroidal Or Opioid Analgesia Use for Children with Musculoskeletal Injuries: The No OUCH Trials

| REB # :            | Study ID                                                         | Enrolment Date                       |
|--------------------|------------------------------------------------------------------|--------------------------------------|
| PI: Dr. Samina Ali | ____ - ____ - ____<br>(site - preference group - patient number) | ___ / ___ / 20___<br>dd / mmm / yyyy |

## POST-Discharge Questions

| Questions for Treating ED Physician                     |                                                                                                                                                                                                              |
|---------------------------------------------------------|--------------------------------------------------------------------------------------------------------------------------------------------------------------------------------------------------------------|
| Which drug(s) would you have chosen to give this child? | <input type="checkbox"/> Ibuprofen alone or<br><input type="checkbox"/> Ibuprofen + Acetaminophen or<br><input type="checkbox"/> Ibuprofen + Hydromorphone<br><input type="checkbox"/> other, please specify |
| Which drug(s) do you think that the child received?     | <input type="checkbox"/> Ibuprofen alone or<br><input type="checkbox"/> Ibuprofen + Acetaminophen or<br><input type="checkbox"/> Ibuprofen + Hydromorphone                                                   |

| Unblinding                                   |                                                                              |
|----------------------------------------------|------------------------------------------------------------------------------|
| Was the study unblinded during the ED visit? | <input type="checkbox"/> Yes, please explain.<br><input type="checkbox"/> No |

| Co-Interventions                                 |                                                          |                                                          |                             |
|--------------------------------------------------|----------------------------------------------------------|----------------------------------------------------------|-----------------------------|
| Were any interventions done during the ED visit? |                                                          | <input type="checkbox"/> Yes*                            | <input type="checkbox"/> No |
| * If "YES", please fill out the table below      |                                                          |                                                          |                             |
| Intervention                                     | Administered?                                            | Date and Time of Administration<br>(dd/ mmm/ yyyy HH:MM) | Comments                    |
| Reduction of the fracture?                       | <input type="checkbox"/> Yes <input type="checkbox"/> No |                                                          |                             |
| Splint?                                          | <input type="checkbox"/> Yes <input type="checkbox"/> No |                                                          |                             |
| Cast?                                            | <input type="checkbox"/> Yes <input type="checkbox"/> No |                                                          |                             |
| Ice?                                             | <input type="checkbox"/> Yes <input type="checkbox"/> No |                                                          |                             |
| Distraction?                                     | <input type="checkbox"/> Yes <input type="checkbox"/> No |                                                          |                             |
| Other? Please specify:<br>_____                  | <input type="checkbox"/> Yes <input type="checkbox"/> No |                                                          |                             |

If a procedural sedation or a medication has been administered, please fill out the Concomitant Medication Form.



## A study of Non-Steroidal Or Opioid Analgesia Use for Children with Musculoskeletal Injuries: The No OUCH Trials

| REB # :            | Study ID                                                         | Enrolment Date                      |
|--------------------|------------------------------------------------------------------|-------------------------------------|
| PI: Dr. Samina Ali | ____ - ____ - ____<br>(site - preference group - patient number) | ____ / ____ / 20____<br>dd mmm yyyy |

| Discharge Details                                                                           |                                                                                                                        |
|---------------------------------------------------------------------------------------------|------------------------------------------------------------------------------------------------------------------------|
| Discharge Disposition                                                                       | <input type="checkbox"/> Discharged Home<br><input type="checkbox"/> Admitted<br><input type="checkbox"/> Other, _____ |
| Date and Time of Discharge                                                                  | ____ / ____ / ____<br>dd mmm yyyy<br>____ : ____<br>(24 hour clock)                                                    |
| Length of Stay in ED (calculated field):                                                    | ____ (hours, to one decimal place)                                                                                     |
| Final diagnosis at discharge (per MD):                                                      |                                                                                                                        |
| Radiologic Exams:                                                                           | <input type="checkbox"/> Yes<br><input type="checkbox"/> No                                                            |
| If yes, Date and Time of Radiologic Exam:                                                   | ____ / ____ / ____<br>dd mmm yyyy<br>____ : ____<br>(24 hour clock)                                                    |
| Final diagnosis from radiologist's report:<br>(From chart or electronic health care system) |                                                                                                                        |



**A study of Non-Steroidal Or Opioid Analgesia Use for Children with Musculoskeletal Injuries: The No OUCH Trials**

| REB # :            | Study ID                                                         | Enrolment Date                       |
|--------------------|------------------------------------------------------------------|--------------------------------------|
| PI: Dr. Samina Ali | ____ - ____ - ____<br>(site - preference group - patient number) | ___ / ___ / 20___<br>dd / mmm / yyyy |

**24 Hour Follow-up Survey**

**Adverse Effects and Side Effects**

After you were discharged from the emergency department, has your child experienced any adverse (bad) effects or side effects that you think are related to the pain medicines they got in the study?

- Yes  
 No

If YES, please explain:

**Medication Uses**

After you were discharged from the emergency department, has your child taken any other medicines?

- Yes  
 No

If YES, please specify:

**Home Pain Assessment**

Please rate your child's **overall** (average) pain experience in the last 24 hours, on a scale from 0-10, where 0=no pain and 10=the worst pain imaginable.

\_\_\_\_\_/10

Please rate your child's **worst** pain experienced in the last 24 hours, on a scale from 0-10, where 0=no pain and 10= the worst pain imaginable.

\_\_\_\_\_/10

**Pain Related Function**

Did your child whine or complain more than usual in the last 24 hours?

Yes  No

Did your child play less than usual in the last 24 hours?

Yes  No

Did your child do the things they normally do in the last 24 hours?

Yes  No

Did your child act more quiet than usual in the last 24 hours?

Yes  No

Did your child have less energy than usual in the last 24 hours?

Yes  No

Did your child eat less than usual in the last 24 hours?

Yes  No

Did your child sleep less than usual in the last 24 hours?

Yes  No

**A study of Non-Steroidal Or Opioid Analgesia Use for Children with Musculoskeletal Injuries: The No OUCH Trials**

| REB # :            | Study ID                                                         | Enrolment Date                    |
|--------------------|------------------------------------------------------------------|-----------------------------------|
| PI: Dr. Samina Ali | ____ - ____ - ____<br>(site - preference group - patient number) | __ / __ / 20__<br>dd / mmm / yyyy |

|                                                                              |                                                          |
|------------------------------------------------------------------------------|----------------------------------------------------------|
| Did your child hold the sore part of the body in the last 24 hours?          | <input type="checkbox"/> Yes <input type="checkbox"/> No |
| Did your child moan or groan more than usual in the last 24 hours?           | <input type="checkbox"/> Yes <input type="checkbox"/> No |
| Did your child want to be close to you more than usual in the last 24 hours? | <input type="checkbox"/> Yes <input type="checkbox"/> No |
| <b>Total PPM Score (Automatic Calculation – Hidden Field) = 0 - 10</b>       |                                                          |

| Activity Score                                               |                                                                                                                                        |
|--------------------------------------------------------------|----------------------------------------------------------------------------------------------------------------------------------------|
| Rate your child's ability to perform their usual activities: | <input type="checkbox"/> A No limitation<br><input type="checkbox"/> B Mild limitation<br><input type="checkbox"/> C Severe limitation |

| At-Home Treatments                                                                     |                                                          |
|----------------------------------------------------------------------------------------|----------------------------------------------------------|
| Did your child use any of the following in the last 24 hours to help treat their pain? |                                                          |
| Ice?                                                                                   | <input type="checkbox"/> Yes <input type="checkbox"/> No |
| Elevation (raising their sore body part)?                                              | <input type="checkbox"/> Yes <input type="checkbox"/> No |
| Distraction (such as iPad, movies, games)?                                             | <input type="checkbox"/> Yes <input type="checkbox"/> No |
| Please describe any other things that your child used to help treat the pain.          | Free text                                                |

| Missed School and Work                                       |                                                          |
|--------------------------------------------------------------|----------------------------------------------------------|
| Did your child miss school and/or work in the last 24 hours? | <input type="checkbox"/> Yes <input type="checkbox"/> No |
| Did YOU (caregiver/parent) miss work in the last 24 hours?   | <input type="checkbox"/> Yes <input type="checkbox"/> No |

| What Did Your Child Receive?                                                                                                                                                                                                                       |
|----------------------------------------------------------------------------------------------------------------------------------------------------------------------------------------------------------------------------------------------------|
| “We would like to let you know that your child received the following as their study drugs:<br>[Advil only OR Advil and Tylenol OR Advil and Dilaudid].<br>We will ask you about your thoughts in this when we email/ call you again in one week.” |

|                                                                                                                                                                                                                                                    |
|----------------------------------------------------------------------------------------------------------------------------------------------------------------------------------------------------------------------------------------------------|
| <u>Do you have any other comments or concerns?</u>                                                                                                                                                                                                 |
| Thank you for completing this follow-up survey, we appreciate your participation in the No OUCH study!<br>Without families like you, our research would not be possible. Your next (and last) follow-up survey will be<br>in approximately 1 week. |

## A study of Non-Steroidal Or Opioid Analgesia Use for Children with Musculoskeletal Injuries: The No OUCH Trials

|                    |                                                                  |                                     |
|--------------------|------------------------------------------------------------------|-------------------------------------|
| REB # :            | Study ID                                                         | Enrolment Date                      |
| PI: Dr. Samina Ali | ____ - ____ - ____<br>(site - preference group - patient number) | ____ / ____ / 20____<br>dd mmm yyyy |

**Follow-up Survey # 2 (1-2 weeks after discharge)***Call must be done in this time window*1 week from discharge: Date: \_\_\_\_ / \_\_\_\_ / \_\_\_\_  
dd mmm yyyy2 weeks from discharge: Date: \_\_\_\_ / \_\_\_\_ / \_\_\_\_  
dd mmm yyyy**Follow-up Call Attempts:**Number of call attempts made:  1  2  3  4  5  
 N/A – completed via email

|           | Date and Time<br>(dd/ mmm/ yyyy HH:MM) | RA<br>Initials | Comments |
|-----------|----------------------------------------|----------------|----------|
| Call # 1: | ____ / ____ / ____ ____:____           |                |          |
| Call # 2: | ____ / ____ / ____ ____:____           |                |          |
| Call # 3: | ____ / ____ / ____ ____:____           |                |          |
| Call # 4: | ____ / ____ / ____ ____:____           |                |          |
| Call # 5: | ____ / ____ / ____ ____:____           |                |          |

1 week Follow-up completed?:  Yes  No (Lost to follow-up)

If YES, Continue...

**A study of Non-Steroidal Or Opioid Analgesia Use for Children with Musculoskeletal Injuries: The No OUCH Trials**

| REB # :            | Study ID                                                         | Enrolment Date                    |
|--------------------|------------------------------------------------------------------|-----------------------------------|
| PI: Dr. Samina Ali | ____ - ____ - ____<br>(site - preference group - patient number) | __ / __ / 20__<br>dd / mmm / yyyy |

**1-2 Week Follow-up Survey**

| <b>Parent / Caregiver Satisfaction and Comfort Measures</b>                                                                                                                                                                             |                                                                                                                                                                                                                            |
|-----------------------------------------------------------------------------------------------------------------------------------------------------------------------------------------------------------------------------------------|----------------------------------------------------------------------------------------------------------------------------------------------------------------------------------------------------------------------------|
| <p>As you might remember, your child received _XXX_ in the emergency department, as part of this study.</p> <p>Did knowing what pain medicine(s) your child received in the study affect how you treated your child's pain at home?</p> | <input type="checkbox"/> Yes<br><input type="checkbox"/> No<br><input type="checkbox"/> Unsure                                                                                                                             |
| Please explain:                                                                                                                                                                                                                         | Free text                                                                                                                                                                                                                  |
| <p>How do you feel about the pain treatment provided by the medicines your child was given in the emergency department, as part of this study?</p>                                                                                      | <input type="checkbox"/> Very Satisfied<br><input type="checkbox"/> Somewhat Satisfied<br><input type="checkbox"/> Neutral<br><input type="checkbox"/> Somewhat dissatisfied<br><input type="checkbox"/> Very dissatisfied |
| Please explain:                                                                                                                                                                                                                         | Free text                                                                                                                                                                                                                  |
| <p>Do you feel that that the medicines that your child received in the emergency department, as part of this study provided adequate/ enough pain relief for your child?</p>                                                            | <input type="checkbox"/> Yes<br><input type="checkbox"/> No<br><input type="checkbox"/> Unsure                                                                                                                             |
| Please explain:                                                                                                                                                                                                                         | Free text                                                                                                                                                                                                                  |
| <p>Would you accept the same medicine for your child, in the unlikely event of a similar injury in the future?</p>                                                                                                                      | <input type="checkbox"/> Yes<br><input type="checkbox"/> No<br><input type="checkbox"/> Unsure                                                                                                                             |
| Please explain:                                                                                                                                                                                                                         | Free text                                                                                                                                                                                                                  |

**A study of Non-Steroidal Or Opioid Analgesia Use for Children with Musculoskeletal Injuries: The No OUCH Trials**

| REB # :            | Study ID                                                         | Enrolment Date                       |
|--------------------|------------------------------------------------------------------|--------------------------------------|
| PI: Dr. Samina Ali | ____ - ____ - ____<br>(site - preference group - patient number) | ___ / ___ / 20___<br>dd / mmm / yyyy |

**Since visiting the emergency department, has your child had contact with any of the following health services for any reason related to their injury:**

|                                                                                                                                                                                                  |                                                                                     |
|--------------------------------------------------------------------------------------------------------------------------------------------------------------------------------------------------|-------------------------------------------------------------------------------------|
| A. Family Doctor / General Practitioner?<br>If YES, how many times?                                                                                                                              | <input type="checkbox"/> Yes <input type="checkbox"/> No<br>____ times              |
| B. Orthopedic Specialist?<br>If YES, how many times?                                                                                                                                             | <input type="checkbox"/> Yes <input type="checkbox"/> No<br>____ times              |
| C. Revisit to Emergency Department?<br>If YES, how many times?                                                                                                                                   | <input type="checkbox"/> Yes <input type="checkbox"/> No<br>____ times              |
| D. Other Health Professional (e.g. physiotherapist, chiropractor, naturopath, rehabilitation professional, etc)?<br>If YES, please specify which kind of professional<br>If YES, how many times? | <input type="checkbox"/> Yes <input type="checkbox"/> No<br>Open text<br>____ times |

**For any health care visits related to this injury (including your original visit to the emergency department), has your family:**

|                                                                                                                                                                                                                  |                                                                                                                                                          |
|------------------------------------------------------------------------------------------------------------------------------------------------------------------------------------------------------------------|----------------------------------------------------------------------------------------------------------------------------------------------------------|
| A. Driven yourself or been given a lift in someone else's car?<br>If YES, how many times?<br>If YES, estimated total cost of gas<br>If YES, did you use paid parking?<br>If YES, estimated total cost of parking | <input type="checkbox"/> Yes <input type="checkbox"/> No<br>____ times<br>____ \$<br><input type="checkbox"/> Yes <input type="checkbox"/> No<br>____ \$ |
| B. Used Public Transport (e.g. bus, subway)?<br>If YES, how many times?<br>If YES, estimated total cost of using public transportation                                                                           | <input type="checkbox"/> Yes <input type="checkbox"/> No<br>____ times<br>____ \$                                                                        |
| C. Used Taxi/Uber rides?<br>If YES, how many times?<br>If YES, estimated total cost of using this service                                                                                                        | <input type="checkbox"/> Yes <input type="checkbox"/> No<br>____ times<br>____ \$                                                                        |

**A study of Non-Steroidal Or Opioid Analgesia Use for Children with Musculoskeletal Injuries: The No OUCH Trials**

| REB # :            | Study ID                                                         | Enrolment Date                    |
|--------------------|------------------------------------------------------------------|-----------------------------------|
| PI: Dr. Samina Ali | ____ - ____ - ____<br>(site - preference group - patient number) | __ / __ / 20__<br>dd / mmm / yyyy |

| Additional Childcare Expenses                                                                                                                                                     |                                                                                   |
|-----------------------------------------------------------------------------------------------------------------------------------------------------------------------------------|-----------------------------------------------------------------------------------|
| A. Have you needed extra childcare for ANY of your children because of this injury (e.g. emergency department visit, other healthcare visits, child unable to go to school, etc)? | <input type="checkbox"/> Yes <input type="checkbox"/> No                          |
| B. If YES, was it extra <b>unpaid</b> childcare (i.e. grandparents, neighbours)<br>If YES, how many hours?                                                                        | <input type="checkbox"/> Yes <input type="checkbox"/> No<br>____ hours            |
| C. If YES, was it extra <b>paid</b> childcare (i.e. babysitter, daycare)?<br>If YES, how many hours?<br>If YES, estimated total cost of for extra paid childcare                  | <input type="checkbox"/> Yes <input type="checkbox"/> No<br>____ hours<br>____ \$ |

| Since your emergency department visit ~1 week ago:                                                                                                                          |                      |
|-----------------------------------------------------------------------------------------------------------------------------------------------------------------------------|----------------------|
| How many days in total did your child use a pain medication, for injury-related pain?                                                                                       | ____ days            |
| How many days in total did your child miss school and/ or work?                                                                                                             | ____ days            |
| How many days in total did your child not eat properly?                                                                                                                     | ____ days            |
| How many nights in total did your child have disrupted/upset sleep?                                                                                                         | ____ nights          |
| How many days in total was your child unable to participate in their usual activities?                                                                                      | ____ days            |
| How many days in total did YOU (or another caregiver) have to miss work from paid employment because of your child's injury?                                                | ____ days            |
| On a scale of 0 to 10 (where 0 means not at all affected and 10 means extremely affected), how much did this injury affect <u>your child's</u> quality of life?             | 0-10 numerical value |
| On a scale of 0 to 10 (where 0 means not at all affected and 10 means extremely affected), how much did this injury affect <u>your</u> quality of life?                     | 0-10 numerical value |
| <u>Do you have any additional comments or concerns about how this injury and the pain medicines that you used affected you or your child's quality of life?</u>             |                      |
| Thank you for completing this final follow-up survey, we appreciate your participation in the No OUCH study! Without families like you, our research would not be possible. |                      |





Two Randomized Controlled Trials of Non-Steroidal Or Opioid Analgesia Use for Children with Musculoskeletal Injuries: The No OUCH Study

|                    |                                                                     |                                      |
|--------------------|---------------------------------------------------------------------|--------------------------------------|
| <b>REB # :</b>     | <b>Study ID</b>                                                     | <b>Enrolment Date</b>                |
| PI: Dr. Samina Ali | _____ - _____ - _____<br>(site - preference group - patient number) | ___ / ___ / 20___<br>dd / mmm / yyyy |

**ADVERSE EVENTS FORM**

| To be filled out by Research Nurse |                             |                            |                                       |                                                                                                     |                       |                                                | To be filled out by Site Investigator                                                                                          |                                                                                               |                                          |                                                                                                   |                 |
|------------------------------------|-----------------------------|----------------------------|---------------------------------------|-----------------------------------------------------------------------------------------------------|-----------------------|------------------------------------------------|--------------------------------------------------------------------------------------------------------------------------------|-----------------------------------------------------------------------------------------------|------------------------------------------|---------------------------------------------------------------------------------------------------|-----------------|
| No.                                | Initial Report or Follow-up | Brief Description of Event | Onset Date & Time (dd/mmm/yyyy HH:MM) | Intensity grade:<br>1. Mild<br>2. Moderate<br>3. Severe<br>4. Life-threatening<br>5. Fatal or Death | Expected AE?<br>Y / N | SAE?<br>Y / N<br><br>If YES, fill out SAE Form | Action Taken<br>1. None<br>2. Medication<br>3. New or Prolonged Hospitalization<br>4. Procedure / Surgery<br>5. Other, specify | Outcome<br>1. Resolved<br>2. Resolved w/ sequelae<br>3. Ongoing<br>4. Death<br>5. Lost to f/u | Date & Time Resolved (dd/mmm/yyyy HH:MM) | Relationship to Study<br>1. Unrelated<br>2. Unlikely<br>3. Possible<br>4. Probable<br>5. Definite | Site PI Initial |
|                                    |                             |                            |                                       |                                                                                                     |                       |                                                |                                                                                                                                |                                                                                               |                                          |                                                                                                   |                 |
|                                    |                             |                            |                                       |                                                                                                     |                       |                                                |                                                                                                                                |                                                                                               |                                          |                                                                                                   |                 |
|                                    |                             |                            |                                       |                                                                                                     |                       |                                                |                                                                                                                                |                                                                                               |                                          |                                                                                                   |                 |
|                                    |                             |                            |                                       |                                                                                                     |                       |                                                |                                                                                                                                |                                                                                               |                                          |                                                                                                   |                 |

Two Randomized Controlled Trials of Non-Steroidal Or Opioid Analgesia Use for Children with Musculoskeletal Injuries: The No OUCH Study

|                    |                                                                     |                                  |
|--------------------|---------------------------------------------------------------------|----------------------------------|
| REB # :            | Study ID                                                            | Enrolment Date                   |
| PI: Dr. Samina Ali | _____ - _____ - _____<br>(site - preference group - patient number) | ___/___/20___<br>dd / mmm / yyyy |

SERIOUS ADVERSE EVENTS FORM

|                                                                                                                            |                                                                                                                                                                                                                                                                                                                                                                   |
|----------------------------------------------------------------------------------------------------------------------------|-------------------------------------------------------------------------------------------------------------------------------------------------------------------------------------------------------------------------------------------------------------------------------------------------------------------------------------------------------------------|
| Date and time Site Investigator and Site Research Coordinator were notified:<br><i>(to be completed by Research Nurse)</i> | ____/____/____ : ____<br>dd / mmm / yyyy (24 hour clock)                                                                                                                                                                                                                                                                                                          |
| <b>To be completed by site RC / Investigator</b>                                                                           |                                                                                                                                                                                                                                                                                                                                                                   |
| Date and time the local REB was notified:                                                                                  | ____/____/____ : ____<br>dd / mmm / yyyy (24 hour clock)<br><br><input type="checkbox"/> Not applicable<br><i>Local SAEs must be reported to REB if the event is serious, unexpected, and considered to be related or possibly related to the study. Local SAEs are to be reported to the REB (via email to REB coordinator) within 7 days of their discovery</i> |
| Date and time the lead site Principal Investigator was notified:                                                           | ____/____/____ : ____<br>dd / mmm / yyyy (24 hour clock)                                                                                                                                                                                                                                                                                                          |
| Follow up comments:<br><i>(to be completed by site Investigator)</i>                                                       |                                                                                                                                                                                                                                                                                                                                                                   |

Signature of Research Nurse: \_\_\_\_\_

Signature of Site Investigator: \_\_\_\_\_

Date: \_\_\_\_/\_\_\_\_/\_\_\_\_  
dd / mmm / yyyy

Date: \_\_\_\_/\_\_\_\_/\_\_\_\_  
dd / mmm / yyyy

Two Randomized Controlled Trials of Non-Steroidal Or Opioid Analgesia Use for Children with Musculoskeletal Injuries: The No OUCH Study

|                    |                                                                     |                                         |
|--------------------|---------------------------------------------------------------------|-----------------------------------------|
| <b>REB # :</b>     | <b>Study ID</b>                                                     | <b>Enrolment Date</b>                   |
| PI: Dr. Samina Ali | _____ - _____ - _____<br>(site - preference group - patient number) | ____ / ____ / 20____<br>dd / mmm / yyyy |

**PROTOCOL DEVIATION FORM**

Did any Protocol Deviations Occur?  Yes  No

| Description of Protocol Deviation | Deviation Category/ Code* | Date Deviation Occurred (dd/mm/yyyy) | Time Deviation Occurred (HH:MM) | Date REB Notified (if applicable) (dd/mm/yyyy) | Date Sponsor Notified (if applicable) (dd/mm/yyyy) | Site PI Initial |
|-----------------------------------|---------------------------|--------------------------------------|---------------------------------|------------------------------------------------|----------------------------------------------------|-----------------|
| 1)                                |                           |                                      |                                 | <input type="checkbox"/> Not applicable        | <input type="checkbox"/> Not applicable            |                 |
| 2)                                |                           |                                      |                                 | <input type="checkbox"/> Not applicable        | <input type="checkbox"/> Not applicable            |                 |
| 3)                                |                           |                                      |                                 | <input type="checkbox"/> Not applicable        | <input type="checkbox"/> Not applicable            |                 |
| 4)                                |                           |                                      |                                 | <input type="checkbox"/> Not applicable        | <input type="checkbox"/> Not applicable            |                 |
| 5)                                |                           |                                      |                                 | <input type="checkbox"/> Not applicable        | <input type="checkbox"/> Not applicable            |                 |

Two Randomized Controlled Trials of Non-Steroidal Or Opioid Analgesia Use for Children with Musculoskeletal Injuries: The No OUCH Study

| REB # :            | Study ID                                                                                                | Enrolment Date                                                        |
|--------------------|---------------------------------------------------------------------------------------------------------|-----------------------------------------------------------------------|
| PI: Dr. Samina Ali | <p style="text-align: center;">_____ - _____ - _____<br/>(site - preference group - patient number)</p> | <p style="text-align: center;">__ / __ / 20__<br/>dd / mmm / yyyy</p> |

|                                                                                                                                                                                                                                                                                                                                                                                                                                                                                                                                                                                                                                                                                                                                                                                                                                                                                                                                                                                                                                                                                                                                                                                                                                                                                                                                                                                                                                    |
|------------------------------------------------------------------------------------------------------------------------------------------------------------------------------------------------------------------------------------------------------------------------------------------------------------------------------------------------------------------------------------------------------------------------------------------------------------------------------------------------------------------------------------------------------------------------------------------------------------------------------------------------------------------------------------------------------------------------------------------------------------------------------------------------------------------------------------------------------------------------------------------------------------------------------------------------------------------------------------------------------------------------------------------------------------------------------------------------------------------------------------------------------------------------------------------------------------------------------------------------------------------------------------------------------------------------------------------------------------------------------------------------------------------------------------|
| <p><b>*DEVIATION CATEGORIES / CODES:</b></p> <p><u>Safety (Category A)</u></p> <ol style="list-style-type: none"> <li>1. Not reporting an SAE within 72 hours</li> <li>2. AE/SAE is not reported to IRB</li> </ol> <p><u>Informed Consent (Category B)</u></p> <ol style="list-style-type: none"> <li>3. Failure to obtain informed consent</li> <li>4. Consent form used was not current REB-approved version Consent form missing</li> <li>5. Consent form missing</li> <li>6. Consent form not signed and dated by participant</li> <li>7. Consent form does not contain all required signatures</li> </ol> <p><u>Eligibility (Category C)</u></p> <ol style="list-style-type: none"> <li>8. Participant did not meet eligibility criterion</li> <li>9. Randomization of an ineligible participant</li> <li>10. Participant randomized prior to completing Baseline Assessment, etc.</li> </ol> <p><u>Protocol implementation (Category D)</u></p> <ol style="list-style-type: none"> <li>11. Failure to keep IRB approval up to date</li> <li>12. Participant receives wrong treatment</li> <li>13. Use of unallowable concomitant treatments</li> <li>14. Prescribed dosing outside protocol guidelines</li> <li>15. Missed assessment</li> <li>16. Assessment completed outside of protocol guidelines for timing</li> </ol> <p><u>Other</u></p> <ol style="list-style-type: none"> <li>17. Other, specify in log</li> </ol> |
|------------------------------------------------------------------------------------------------------------------------------------------------------------------------------------------------------------------------------------------------------------------------------------------------------------------------------------------------------------------------------------------------------------------------------------------------------------------------------------------------------------------------------------------------------------------------------------------------------------------------------------------------------------------------------------------------------------------------------------------------------------------------------------------------------------------------------------------------------------------------------------------------------------------------------------------------------------------------------------------------------------------------------------------------------------------------------------------------------------------------------------------------------------------------------------------------------------------------------------------------------------------------------------------------------------------------------------------------------------------------------------------------------------------------------------|

For peer review only

**A study of Non-Steroidal Or Opioid Analgesia Use for Children with Musculoskeletal Injuries: The No OUCH Trials**

| REB # :            | Study ID                                                         | Enrolment Date                   |
|--------------------|------------------------------------------------------------------|----------------------------------|
| PI: Dr. Samina Ali | ____ - ____ - ____<br>(site - preference group - patient number) | ___ / ___ / 20___<br>dd mmm yyyy |

**Unanticipated Problems (UP) Form**

|                                                                                                                                                                                                                                                                                        |                                                                                                                                                                                                                                                                                                                                                                                                                                                                                                                                                                                                                                                                                                                         |
|----------------------------------------------------------------------------------------------------------------------------------------------------------------------------------------------------------------------------------------------------------------------------------------|-------------------------------------------------------------------------------------------------------------------------------------------------------------------------------------------------------------------------------------------------------------------------------------------------------------------------------------------------------------------------------------------------------------------------------------------------------------------------------------------------------------------------------------------------------------------------------------------------------------------------------------------------------------------------------------------------------------------------|
| Date UP Identified:                                                                                                                                                                                                                                                                    | ___ / ___ / ___<br>dd mmm yyyy                                                                                                                                                                                                                                                                                                                                                                                                                                                                                                                                                                                                                                                                                          |
| Identify UP:<br><i>(Give the UP a brief title)</i>                                                                                                                                                                                                                                     | Open text                                                                                                                                                                                                                                                                                                                                                                                                                                                                                                                                                                                                                                                                                                               |
| The Unanticipated Problem was unexpected in terms of nature, severity or frequency:                                                                                                                                                                                                    | <input type="checkbox"/> Yes <input type="checkbox"/> No                                                                                                                                                                                                                                                                                                                                                                                                                                                                                                                                                                                                                                                                |
| The Unanticipated Problem is possibly related to participation in the research:                                                                                                                                                                                                        | <input type="checkbox"/> Yes <input type="checkbox"/> No                                                                                                                                                                                                                                                                                                                                                                                                                                                                                                                                                                                                                                                                |
| The Unanticipated Problem suggests that the research places subjects or others at a greater risk of harm than was previously known or recognized:                                                                                                                                      | <input type="checkbox"/> Yes <input type="checkbox"/> No                                                                                                                                                                                                                                                                                                                                                                                                                                                                                                                                                                                                                                                                |
| Briefly Describe the UP:<br><i>(Include additional or supplementary information as necessary. Include date of incident, date of discovery, describe harm or potential harm that occurred to subject(s), whether the incident is resolved, whether the subject(s) remains on study)</i> | Open text                                                                                                                                                                                                                                                                                                                                                                                                                                                                                                                                                                                                                                                                                                               |
| What action was taken with the study as a result of the Unanticipated Problem?<br><br><i>(Check all that apply)</i>                                                                                                                                                                    | <input type="checkbox"/> No action<br><input type="checkbox"/> Revise protocol to eliminate apparent immediate hazards to subjects<br><input type="checkbox"/> Modification of inclusion or exclusion criteria to mitigate newly identified risks<br><input type="checkbox"/> Implementation of additional procedures for monitoring subjects<br><input type="checkbox"/> Suspension of enrollment of new subjects<br><input type="checkbox"/> Notify currently enrolled subjects<br><input type="checkbox"/> Suspension of research procedures in currently enrolled subject<br><input type="checkbox"/> Modification of consent documents to include a description of newly recognized risks (site and/or study wide) |

## A study of Non-Steroidal Or Opioid Analgesia Use for Children with Musculoskeletal Injuries: The No OUCH Trials

| REB # :            | Study ID                                                         | Enrolment Date                   |
|--------------------|------------------------------------------------------------------|----------------------------------|
| PI: Dr. Samina Ali | ____ - ____ - ____<br>(site - preference group - patient number) | ___ / ___ / 20___<br>dd mmm yyyy |

|                                                            |                                                                                                                                                                                                                                                                                     |
|------------------------------------------------------------|-------------------------------------------------------------------------------------------------------------------------------------------------------------------------------------------------------------------------------------------------------------------------------------|
|                                                            | <input type="checkbox"/> Provision of additional information about newly recognized risks to previously enrolled subjects<br><input type="checkbox"/> Other: _____                                                                                                                  |
| Is the Unanticipated Problem a serious adverse event?      | <input type="checkbox"/> Yes <input type="checkbox"/> No<br><i>If the Unanticipated Problem is a serious adverse event, submit this form and make sure that the adverse event form and Serious Adverse Event report have been completed and submitted as per local site policy.</i> |
| Was the Unexpected Problem reported to the sponsor?        | <input type="checkbox"/> Yes <input type="checkbox"/> No                                                                                                                                                                                                                            |
| <b>If YES</b> , Date UP reported to the sponsor:           | ___ / ___ / ___<br>dd mmm yyyy                                                                                                                                                                                                                                                      |
| <b>If NO</b> , why was the UP not reported to the sponsor? | Open text                                                                                                                                                                                                                                                                           |
| Was the Unexpected Problem reported to the local REB?      | <input type="checkbox"/> Yes <input type="checkbox"/> No                                                                                                                                                                                                                            |
| <b>If YES</b> , Date UP reported to the REB:               | ___ / ___ / ___<br>dd mmm yyyy                                                                                                                                                                                                                                                      |
| <b>If NO</b> , why was the UP not reported to the REB?     | Open text                                                                                                                                                                                                                                                                           |

A study of Non-Steroidal Or Opioid Analgesia Use for Children with Musculoskeletal Injuries: The No OUCH Trials

| REB # :            | Study ID                                                         | Enrolment Date                      |
|--------------------|------------------------------------------------------------------|-------------------------------------|
| PI: Dr. Samina Ali | ____ - ____ - ____<br>(site - preference group - patient number) | ____ / ____ / 20____<br>dd mmm yyyy |

**Early Withdrawal Form**

|                                          |                                                                                                                                                                                                                                                                            |
|------------------------------------------|----------------------------------------------------------------------------------------------------------------------------------------------------------------------------------------------------------------------------------------------------------------------------|
| Did participant withdraw from the study? | <input type="checkbox"/> Yes <input type="checkbox"/> No                                                                                                                                                                                                                   |
| <b>If YES:</b> Date of Discontinuation:  | ____ / ____ / ____<br>dd mmm yyyy                                                                                                                                                                                                                                          |
| Reasons for Discontinuation:             | <input type="checkbox"/> Adverse Event / Serious Adverse Event<br><input type="checkbox"/> Death<br><input type="checkbox"/> Withdrawal of Consent / Assent<br><input type="checkbox"/> Protocol Violation, Specify _____<br><input type="checkbox"/> Other, Specify _____ |
| <b>If withdrew consent / assent:</b>     |                                                                                                                                                                                                                                                                            |
| 1. Permission to use collected data?     | <input type="checkbox"/> Yes <input type="checkbox"/> No                                                                                                                                                                                                                   |
| 2. Permission to conduct Chart Review?   | <input type="checkbox"/> Yes <input type="checkbox"/> No                                                                                                                                                                                                                   |
| 3. Telephone follow up to continue?      | <input type="checkbox"/> Yes <input type="checkbox"/> No                                                                                                                                                                                                                   |
| <u>Comments:</u>                         |                                                                                                                                                                                                                                                                            |



## Data and Safety Monitoring Board (DSMB) Charter

|                                   |                                                                                                 |
|-----------------------------------|-------------------------------------------------------------------------------------------------|
| Protocol                          | Strategy for Patient Orientation Research (SPOR)<br>Innovative Clinical Trials Multi-Year Grant |
| Nominated Principal Investigator: | Dr. Terry Klassen                                                                               |
| Protocol title:                   | Innovation in Pediatric Trials (iPCT) Initiative                                                |
| Sponsor:                          | CIHR - SPOR                                                                                     |
| DSMB Charter version:             | 3.5                                                                                             |
| DSMB Charter date:                | January 18, 2019                                                                                |

### 1. Introduction

The purpose of this charter is to define the responsibilities of the SPOR Innovation in Pediatric Clinical Trials (iPCT) initiative's Data Safety Monitoring Board (DSMB), detail membership requirements, describe the data to be reviewed, delineate the meeting process, and outline the considerations and policies of the DSMB. The DSMB will act in an independent expert advisory capacity to monitor participant safety. The DSMB may wish to review this Charter at regular intervals to determine whether any changes are needed.

### 2. Organization and interactions

#### a. Membership of the DSMB

The DSMB consists of a Chair and 4-6 members with expertise in relevant (clinical) specialties for the study, including members who are knowledgeable about statistical methods for clinical research and analysis of research data. Other members should bring expertise in the clinical specialty the studies are conducted in (pediatric emergency medicine).

The DSMB Chair must be willing to make firm commitment to participate as Chair for the duration of the project.

The DSMB members are appointed by the Network Coordination Centre (NCC) Lead in consultation with the DSMB Chair and must meet the following requirements:

- Be willing to serve as a DSMB member for the duration of the project;
- Comply with the conflict of interest policy specified in this charter;

Although DSMB members are expected to serve for the full duration, in the unlikely event that a member is unable to continue participation, the reason will be documented, and a replacement member will be selected by the DSMB Chair. The new member must have comparable expertise and qualifications to the DSMB member she/he is replacing.

A list of members are mentioned in Appendix A.

### b. Conflict of Interest

The DSMB must consist of individuals who are impartial, independent of the investigator(s) and who have no financial or scientific interest in the study that could impair the members' ability to objectively review study data as outlined below:

- DSMB members must not have any real or perceived scientific, financial, professional, personal, proprietary, or another conflict of interest related to the conduct, outcome, or impact of the study. DSMB members should preferably not be working at any of the participating sites.
- DSMB members must not be engaged in any simultaneously occurring competitive studies in any role that could pose a conflict of interest. DSMB members must also identify and disclose any concurrent service on other DSMBs of the same, related, or competing products;
- DSMB members must be independent of the sponsor, regulatory agencies, principal investigators, clinical care of the study participants, or any other capacity related to study operations. All DSMB members must disclose all possible conflicts of interest in writing before beginning service as a DSMB member.

### c. Confidentiality

All materials, discussions, and proceedings of the DSMB are privileged and confidential. DSMB members agree to use this information exclusively to accomplish the responsibilities of the DSMB. No communication of the deliberations or recommendations of the DSMB, either written or oral, may occur except as required for the DSMB to fulfill its responsibilities. Individual DSMB members are expected to maintain confidentiality regarding the study outside the DSMB (including, but not limited to the investigators, REB, regulatory agencies, or sponsor) except as authorized by the DSMB.

If requested, this charter and accompanying list of Board members may be sent to a Research Ethics Board (REB). In the case, this charter will be marked as not for dissemination, and be sent by the Study Principal Investigator or the Network Manager to the REB Chair, with a cover letter. The SPOR - iPCT initiative does not release Board members' names in response to media inquiries until after publication of the main results of the study.

## 3. DSMB Responsibilities

The DSMB is responsible for safeguarding the interests of individuals participating in iPCT and approved related trials.

This responsibility will be implemented by providing recommendations for continuation or early termination of iPCT trials based on an assessment of safety. The DSMB may also make

recommendations related to the selection, recruitment or retention of participants, their management and adherence to protocol-specific regimens, and the procedures for data management and quality control.

The DSMB is advisory to the Study Principal Investigators and ultimately the iPCT Steering Committee. The DSMB is an independent board appointed by the NCC Lead and approved by the SPOR - iPCT Executive team.

The DSMB's responsibilities are to regularly monitor iPCT clinical trials, review and assess the performance of its operations, and make recommendations, as appropriate, to the Study Principal Investigator and, through the NCC lead, to the iPCT Steering Committee concerning:

- Protection of the safety and interests of the study participants;
- Review of the research protocol, informed consent documents, and plans for data safety and monitoring before initiation of study, - if needed - periodically during the study, and at the conclusion of the study;
- Conduct interim and final evaluation of the study, including safety data, participant recruitment, accrual and retention, risk versus benefit, and other factors that can affect study outcome, including aggregate and individual participant data related to safety.
- Review and evaluation of *ad hoc* safety issues concerning the study at the request of the Study Principal Investigator.
- Continuation, termination, or other modifications of the study based on the performance and observed beneficial or adverse effects of the study; and
- Amendments to the study protocol and consent forms, including whether any new data from other sources affect the equipoise of the study being monitored
- Operation according to the procedures described in this charter and all procedures of the DSMB.

## 4. DSMB Tasks

### a. Before study opening

The DSMB will review completed protocols to assess that the monitoring plan ensures patient safety and research integrity. Consent and assent forms will be reviewed.

### b. During the study

Once a study is open the protocol monitoring shall be facilitated at least semiannually (generally by conference calls) by submission of data summaries from the Data Coordinating Centre regarding each study to the Network Manager who sends these data summaries and available site monitoring reports to the DSMB Chair for preparation of the DSMB Report.

The primary responsibility of the DSMB is to monitor the study for participant safety. The DSMB will review the following safety and related data:

- Participant recruitment, accrual, retention, and withdrawal information;
- Adverse events (AEs) and serious adverse events (SAEs);
  - Tabulated by body system, intensity, seriousness, duration, treatment given, and the relationship to the study drug and study procedure
  - Comparison of events that occur between treatment arms
  - Individual events of particular concern
- Site monitoring reports;
- Any other safety-supporting data requested by the DSMB.

The DSMB will make a recommendation regarding the study continuation, termination, or modifications based on the review. Studies that are accruing poorly may be recommended to be placed into probationary status or closed.

Serious adverse events (SAEs) will be monitored by the DSMB Chair and must be reported by the Sponsor to the DSMB Chair via email **within seven working days** of learning of the event.

All participant withdrawals will be monitored by the DSMB Chair and must be reported by the Sponsor to the DSMB Chair via email **within two weeks** of learning of the withdrawal.

The DSMB may consider data from other studies or external sources during its deliberations, if available, as these results may have a profound impact on the status of the participants and design of the current study.

## 5. Meetings

### a. Projected Schedule of Meetings

An initial meeting of the DSMB will be held before the start of the studies or as soon after that as possible for the members to:

- review the charter;
- receive an overview of study network activities;
- form an understanding of the protocol and definitions being used;
- establish a distribution and meeting schedule;
- review the study modification and termination guidelines; and

Subsequent DSMB meetings will be held to review and discuss study data according to the schedule as described in the table below.

| <i>Timeline</i> | <i>Data Review by</i> |
|-----------------|-----------------------|
| Biannually      | Entire DSMB           |
| Ad hoc (SAE)    | Entire DSMB           |

### b. *Ad Hoc Meetings*

An *ad hoc* meeting of the DSMB may be called at any time by the DSMB Chair or Study Principle Investigator if imminent participant safety issues arise. If a significant safety concern arises during the study, the DSMB Chair may convene a meeting to review safety and any other aspect of the study. Significant safety events may include, but are not limited to, the following:

- A death or life-threatening condition sustained by a participant, regardless of causality;
- An unexpected serious safety issue newly identified during the development program that could expose participants to unnecessary risks;
- Any other concern regarding participant safety raised by any DSMB member.

Proposed study amendments that significantly alter the treatment plan and deal with participant safety concerns will prompt an ad hoc meeting of the DSMB for review before implementation of changes. This may require suspension of enrollment pending DSMB review.

### c. *Meeting Format*

DSMB meetings will be conducted by teleconference and facilitated by the DSMB Chair, consisting of an open session and a closed session. A quorum, defined as **four members of the DSMB including the DSMB Chair must be present to hold a DSMB meeting.**

#### *Open Session*

The open session may be attended by the investigator(s) and representatives of the Sponsor. Investigator and sponsor representatives may attend the open session with DSMB members. The Data Coordinating Centre provides a report for each study, containing: recruitment updates, compliance, withdrawals and other blinded data and non-confidential information regarding operational/logistical issues. This session gives the DSMB an opportunity to query an investigator about issues that have arisen during the review of safety data. Unblinded information will not be discussed in the open session.

#### *Closed Session (if needed)*

The closed session will be restricted to attendance by the DSMB members, and a recorder (NCC administrator) for the review of an interim analysis, prepared by the Methods Core.

At the closed session, study blinding may be broken. Closed sessions also consist of a review of the recommendations the DSMB wishes to make to the investigator and a formal vote.

#### d. Voting

DSMB recommendations will be agreed upon by formal majority vote. In the event of a split vote, the DSMB Chair will cast the deciding vote.

## 6. DSMB Considerations and policies

### a. Stopping Rules

After considering the information in the open and closed session DSMB report, the DSMB will determine whether the study should continue as planned, proceed with modifications, or be terminated. The justification to terminate the study may be due to the DSMB's analysis that there are overwhelming safety issues. If the DSMB votes to terminate the study, the Network Manager will prepare a final study report for the DSMB, and a final DSMB meeting will be held. The DSMB's recommendations at the final DSMB meeting may include continuing action items to the investigator based on the final review.

### b. Meeting Minutes

Minutes of DSMB meetings will be kept in two parts: open session and closed session.

#### *Open Session*

Open session meeting minutes include (at a minimum):

- Protocol number, study title, version;
- DSMB meeting date;
- Copy of the open session agenda;
- A list of attendees, including DSMB members and any others present, listing their professional title and role at the meeting;
- A list of attendees who have been unblinded to any data;
- Information reviewed and related discussion during the open session, including rationale for recommendations provided by voting DSMB members;
- A copy of the DSMB recommendation letter.

The DSMB Recorder is responsible for recording and generating meeting minutes of both open and closed sessions.

Draft minutes of open sessions will be sent to the DSMB Chair for review and approval within three working days of the meeting. The draft minutes will be reviewed by the DSMB Chair within seven working days, and final minutes of the open session will be distributed to the DSMB

members and the investigator within ten working days of the DSMB meeting. Final minutes will be distributed to DSMB members by PDF version sent by secure email.

#### *Closed Session*

Draft minutes of closed sessions will be sent to the DSMB Chair for review and approval within one working day of the DSMB meeting. The draft minutes will be reviewed by the DSMB Chair within three working days, and final minutes of the closed session will be distributed only to the DSMB members within five working days of the DSMB meeting. Final minutes will be distributed to DSMB members by PDF version sent by secure email.

Closed session meeting minutes will not be divulged beyond the DSMB until after the study is closed unless either:

- The DSMB voting members approve the release to preserve the integrity of the study and the safety of participants; or
- Health Canada –Therapeutic Product Directorate requires disclosure.

The investigator, Network Manager and sponsor will receive a complete copy of the open and closed session meeting minutes at the completion of the study.

## 7. Report to DSMB

### a. Responsibility for Preparing DSMB Data Reports (open session)

The report is prepared by the DCC, and sent to the DSMB Chair three weeks before the planned meeting.

### b. Responsibility for Preparing DSMB Interim analysis (closed session)

The report is prepared by the Methods Core, and sent to the DSMB Chair three weeks before the meeting.

### a. Content of the Reports to the DSMB

The DSMB chair will prepare the report to include two DSMB parts – open session and (if available) closed session.

- *Open Session Report:* The open session report presents data only in aggregate and focuses on study conduct issues, like accrual and withdrawal rates, eligibility rates, reasons for ineligibility and discussion of blinded materials. To protect the blind participant-specific data and treatment group data are not presented in the open session report.
- *Closed Session Report:* In the event of serious adverse events or significant protocol violations, the DSMB may bequest closed session reports that include unblinded comparative statistical outputs. The closed session reports include unblinded comparative

1  
2  
3  
4  
5  
6 statistical outputs. The closed session report is considered confidential and must be  
7 destroyed at the conclusion of the meeting.  
8

9  
10 **b. Distribution of the Report to the DSMB**

11 Reports to the DSMB are distributed to DSMB members two weeks before a scheduled meeting.  
12 The report is dated and provided to individual DSMB members in PDF format sent by secure  
13 email.  
14

15  
16 **c. DSMB Reports to Investigator**

17 Following each meeting, the DSMB will issue a confidential report separate from the minutes of  
18 the open and closed sessions that will be sent to the investigator. The report includes a  
19 summary of the open session discussion, does not include unblinded data or discussion of the  
20 unblinded data, and provides the DSMB's recommendations accompanied by clear, concise  
21 rationale for them. The report should contain sufficient information to explain the rationale for  
22 any specific actions by the DSMB without jeopardizing conduct or scientific integrity of the study  
23 (unblinding). If no recommendations are made, the report may simply state, "The DSMB  
24 recommends that the study continues as planned."  
25  
26

27  
28 The report should be presented to the investigator both in writing and orally. The DSMB Chair  
29 communicates directly with the investigator to allow them the opportunity to ask questions and  
30 discuss any recommendations. If the report does include DSMB recommendations for changes  
31 or termination of the study, the report must include a minimum amount of data such that the  
32 investigator can make a reasoned decision in response to the recommendation.  
33  
34

35 If the investigator accepts the recommendations of the DSMB, the investigator will be  
36 responsible for implementing the actions in response. In the event the study must be amended,  
37 the investigator will prepare and submit the amendment to the DSMB and REB for approval  
38 before implementing amendment changes.  
39  
40

41 If the investigator rejects the DSMB's recommendations, the investigator must provide the  
42 DSMB with a written explanation of their decision and supporting rationale within one working  
43 day. If the DSMB has recommended that the study is stopped, but the investigator decides to  
44 continue the study, the investigator will inform all concerned regulatory authorities of its  
45 decision to continue the study despite the DSMB's recommendation. Public disclosure of the  
46 decision to stop the study is at the discretion of the investigator. The DSMB will not make any  
47 public announcements.  
48  
49  
50  
51  
52  
53  
54  
55  
56  
57



## 8. Other

### a. Amendments to the DSMB Charter

This DSMB charter can be amended as needed during the study. All amendments will be documented with sequential version numbers and revision dates and will be recorded in the open session DSMB meeting minutes. Each revision will be reviewed and agreed upon by the DSMB.

### b. Archiving

All DSMB documentation and records will be retained in sealed envelopes in the Sponsor Study File by the National Coordinating Centre for 25 years after completion of the study. Access to archived data will be controlled by the sponsor, which will release the information only as specified in this charter or as required by law.

For peer review only

Working in partnership with

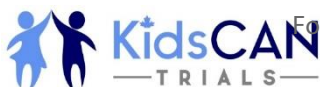

For peer review only: <http://bmjopen.bmj.com/site/about/guidelines.xhtml>

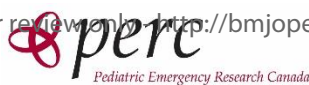

Supported by

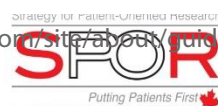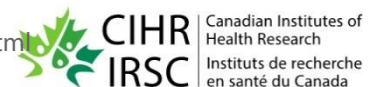

## Appendix A – DSMB members

### Voting members

| <i>Member name</i>               | <i>Conflicts of interest</i> |
|----------------------------------|------------------------------|
| <i>Garth Meckler<br/>(chair)</i> |                              |
| <i>Mark Roback</i>               |                              |
| <i>Anupam Kharbanda</i>          |                              |
| <i>Eyal Cohen</i>                |                              |
| <i>Lise Nigrovic</i>             |                              |

### Ex-officio (non-voting)

NCC Lead: Dr. Geert W. 't Jong

Network Manager: Tannis Erickson

peer review only

Working in partnership with

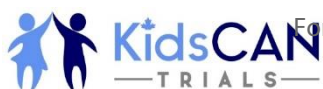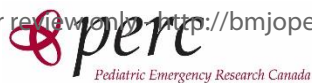

Supported by

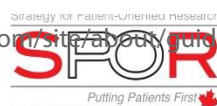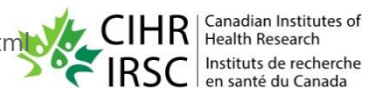

## Appendix B – Definitions

Study Principal Investigator: The investigator who is primarily responsible for a trial.

SPOR Principal Investigator: The investigator designated as Primary Investigator on the SPOR application (Dr. Klassen).

iPCT Steering Committee: Executive committee consisting of the study leads (PIs) and the leads within each core (Network Coordinating Centre; Data Coordinating Centre; Methods Core)

For peer review only

Working in partnership with

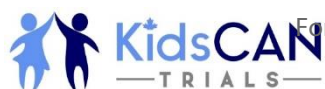

For peer review only: <http://bmjopen.bmj.com/site/about/guidelines.xhtml>

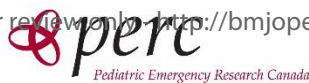

Supported by

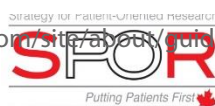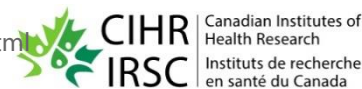

WCHRI

Study: No OUCH

Study Title

Version: 1.0

**Data Management Plan**

Date: 20 Mar 2019

| Study Details        |                                                                                                                            |                       |
|----------------------|----------------------------------------------------------------------------------------------------------------------------|-----------------------|
| <b>Study Title:</b>  | No-OUCH<br>A Study of Non-Steroidal or Opioid Analgesia Use for Children with Musculoskeletal Injuries: The No OUCH Trials |                       |
| <b>Investigator:</b> | Dr. Samina Ali                                                                                                             | <b>Code:</b> 00073476 |
| <b>Sponsor:</b>      | University of Alberta                                                                                                      |                       |
| Document History     |                                                                                                                            |                       |
| Version              | Date                                                                                                                       | Reason For Change     |
| 1                    | 20 Mar 2019                                                                                                                | Initial draft         |

## Introduction

This document defines the data management approach for the named study. Specifically it defines data sources, data handling practice and relevant additional documentation.

## Document Control

This document is to be authorized by WCHRI DCC Team Lead, their designee or a senior manager within the Women & Children's Health Research Institute (WCHRI). The study sponsor (sponsor-initiated studies) and/or Principal Investigator (investigator-initiated studies) should also review and authorize the production version and any subsequent modifications.

Following authorization a read-only 'controlled' copy will be created and the document will be allocated a version number. Subsequent changes will be authorized (see above) and the version number incremented. Each authorized version will be retained on file for audit purposes.

## Study Title

*A Study of Non-Steroidal or Opioid Analgesia Use for Children with Musculoskeletal Injuries: The No OUCH Trials*

## Study Overview

This study will be comprised of two Phase 2, six-centre, randomized, double-blind, placebo-controlled trials that will be run simultaneously. The primary objective of this study is to determine the effectiveness of a combination of opioid and non-opioid oral analgesic medications (PO ibuprofen + PO acetaminophen; PO ibuprofen + PO hydromorphone; PO ibuprofen alone) for the acute pain management of children with an acute musculoskeletal (MSK) limb injury.

The study aims to recruit 536 children, aged 6-17 years, presenting to one of six Canadian pediatric emergency departments (EDs) with an acute MSK injury (<24 hours old) of a single limb over a period of 18 months.

Participants who participate in the Opioid Trail will receive either single-dose:

- A. Oral hydromorphone (0.05mg/kg, max 5mg) + Oral ibuprofen (10mg/kg, max 600mg), OR
- B. Oral acetaminophen (15mg/kg, max 1000mg) + Oral ibuprofen (10mg/kg, max 600mg), OR
- C. Oral ibuprofen (10mg/kg, max 600mg)

Participants who participate in the Non-Opioid Trial will receive either single-dose:

- A. Oral acetaminophen (15mg/kg, max 1000mg) + Oral ibuprofen (10mg/kg, max 600mg), OR

WCHRI

Study: No OUCH

Study Title

Version: 1.0

**Data Management Plan**

Date: 20 Mar 2019

B. Oral ibuprofen (10mg/kg, max 600mg)

Pain scores, any adverse events, level of sedation, and vital signs will be recorded every 30 minutes, for up to 120 minutes following study drug administration. Participants will also receive two follow-up questionnaires, either by email or telephone, at 24 hours and 1 week post discharge from the ED.

For inclusion and exclusion criteria see the study protocol.

### **Primary Efficacy Variables**

Primary Efficacy Endpoint will be the self-reported pain score at 60 minutes, using a 0-10 verbal Numerical Rating Scale (vNRS).

Variable: pain\_vnrs at the 60 minute mark

### **Secondary Efficacy Variables**

The Secondary Efficacy Endpoints will include:

| Endpoint                                                                                                                                                    | Variable Name                                                                                                            |
|-------------------------------------------------------------------------------------------------------------------------------------------------------------|--------------------------------------------------------------------------------------------------------------------------|
| 1. the proportion of patients with a vNRS pain score <3 at 60 minutes                                                                                       | pain_vnrs at the 60 minute mark                                                                                          |
| 2. the proportion of patients with a vNRS pain score reduction of at least 2 points out of 10 at 60 minutes                                                 | pain_vnrs at the 60 minute mark                                                                                          |
| 3. between group differences in pain scores at study time-points (T-30,T-60,T-90, T-120, T-Medical Exam and T-Xray)                                         | pain_vnrs, pain_fpsr and pain_vas at all timepoints                                                                      |
| 4. self-reported caregiver and child satisfaction with pain relief and acceptability of study medications, using a previously employed 5 point Likert scale | qp_rate<br>qp_relief<br>qc_rate<br>qc_same<br>folup2_ratetx<br>folup2_ratetx_expl<br>folup2_relief<br>folup2_relief_expl |
| 5. ED length of stay                                                                                                                                        | pscr_triage<br>disch_dt                                                                                                  |
| 6. frequency of missed fractures or dislocations                                                                                                            | disch_mddx<br>disch_raddx                                                                                                |
| 7. the proportion of children administered a rescue analgesic in the 60 minutes following administration of study medication                                | cm_sd<br>cm_st<br>cm_ed<br>cm_et                                                                                         |
| 8. time to effective analgesia, defined as the first vNRS pain score <3 post-intervention                                                                   | pain_vnrs                                                                                                                |

WCHRI

Study: No OUCH

Study Title

Version: 1.0

**Data Management Plan**

Date: 20 Mar 2019

|                                                                                                                                         |                       |
|-----------------------------------------------------------------------------------------------------------------------------------------|-----------------------|
| 9. children's self-reported pain intensity on the Visual Analog Scale (VAS) and the Faces Pain Scale-Revised (FPS-R) at all study times | pain_vas<br>pain_fpsr |
|-----------------------------------------------------------------------------------------------------------------------------------------|-----------------------|

## Safety Data

Principal Safety Endpoint will be the proportion of children with any adverse events related to study drug administration.

Secondary Safety Endpoints will include 1. the proportion of children with any serious adverse events during the study period, 2. the proportion of children in each study group with a Ramsay Sedation Score (RSS) score between 1 to 3, and 3. the proportion of children with each specific adverse event type during the study period.

## Patient Numbers

The sample size for the three-armed Opioid Trial is 105 patients per arm, for a total of 315. For the two-armed Non-Opioid Trial, a sample of 85 patients per arm, for a total of 170. Thus, the grand total for the No OUCH Study would be 485. In order to account for patients who are excluded from primary analyses due to missing data for the primary (efficacy) outcome and to adjust for loss to follow-up, the sites will recruit approximately 10% more, for a target recruitment of approximately 536 patients. However, in order to preserve the patient preference aspect of this study, which allows families to choose which trial they would like to participate in, we will over-recruit one trial in order to allow the second to achieve its sample size.

## Study Timelines

Participants are enrolled, if eligible, in the ED. Once the drug is administered, patient assessments are implemented in the ED at T0, T30, T60, T90 and T120 time points. Assessments are also collected at the time of the medical examination, time of x-rays and at discharge. Two follow-ups conducted either by phone or online survey to be completed at 1-3 days post discharge and 1-2 weeks post discharge. Total study period: 14 days for all outcome data.

First Participant visit: April 2019

Last Participant visit: expected April 2021

## Ethics Status

This is a Health Canada regulated clinical trial that requires REB approval at participating sites. It is required to be GCP-compliant and undertaken on a validated installation of REDCap.

## Data Sources

All data entry will be performed at the sites by trained research staff, with exception of the survey data which will be entered directly by the parents. Source Documents include medical records. Some data will be collected directly from the study participants and under these circumstances REDCap is considered the source document.

## Standard Operating Procedures

Data management work performed by WCHRI will be undertaken using the current version of WCHRI SOPs.

## Scope of Work

WCHRI staff will perform the following tasks:

Database build, data management activities, delivery of data for analysis, preparation of DSMB reports.

## Data Collection Mode

Data will be collected electronically (any transcription from paper will be performed at the study sites. WCHRI will not receive copies of paper CRFs or source documents.)

## CRF Design

Data collection forms have been developed by the Principal Investigator and her staff with minimal input from WCHRI.

## Data Collection System

Data will be entered into REDCap by personnel at the study sites.

## Randomization and Unblinding

For Randomization and Unblinding specifics, see the protocol.

Randomization of participants will occur outside of REDCap. Should unblinding be required, this will be performed through the study unblinding project in REDCap. In addition, 1-3 days AFTER The primary outcome measures are collected, the study arm assigned to the patient will be revealed.

## Study Monitoring

Monitoring will be performed by staff from the University of Alberta Quality Management in Clinical Research (QMCR) according to their monitoring plan.

## Document Tracking

WCHRI will not be handling paper documents for this study.

## Data Entry

The Study sites will complete electronic CRFs contained within the data collection system (REDCap) based on the contents of the patient records and other data sources.

## Data Handling

Data handling practices for this study are documented in the study's data handling manual. This document will be updated throughout the study as practices are refined and as new situations arise. Specifically, this document covers issues such as data handling conventions, self-evident corrections, data query practice and will also serve to log data handling exceptions.

## Data Quality

The approach to data quality is based on key points contained within ICH GCP. These are:

- Complete            Minimal missing values
- Accurate            Database values match original observation
- Precise              Units and measurability clearly understood
- Timely                Minimal time between observation and recording

WCHRI

Study: No OUCH

Study Title

Version: 1.0

**Data Management Plan**

Date: 20 Mar 2019

- 
- Verifiable Independent assessment or monitoring
  - Traceable Actions taken are logged

The above points will be ensured as follows:

## Data Validation and Queries

Electronic data collection forms will be programmed with online validation checks (also known as edit checks). Based on an understanding of the data collection forms these checks will:

- Alert data entry users to missing data
- Check that numeric variables and dates are within reasonable ranges
- Check for consistency within the data

Entered data will be subject to visual and electronic validation by data management staff according to an approved data validation plan. Issues that arise will be notified to the sites as queries, for resolution.

Data issues will be entered into the data capture system in the form of queries/discrepancies. Sites will respond to the queries, directly in the data collection system. Query responses will be reviewed by data management staff and closed once the issue has been resolved.

## Source Document Verification

This will be performed by study monitors according to the approved monitoring plan.

## Serious Adverse Events

Serious adverse events (SAEs) are to be reported to the sponsor (*and/or PI for investigator-initiated studies*) and ethics board, by the sites, as defined in the study protocol. Periodically the sponsor (or PI) will forward copies of SAE reports to WCHRI for reconciliation with the CRF data.

## Data Coding

Adverse events will be coded with MedDRA by WCHRI staff. A formal coding review will be undertaken by an authorized individual prior to database lock or delivery for interim analysis.

## Data Extract and Delivery

Data will be extracted into SAS data sets for delivery to the study statistician.

## Safety Oversight

Safety oversight will be under the direction of a Data and Safety Monitoring Board (DSMB). The DSMB will operate under the rules of an approved charter which will outline all terms of reference, as well as the frequency of meetings, that will be reviewed at the organizational meeting of the DSMB. Prior to each DSMB meeting, the study statistician shall prepare reports with interim data for presentation to the DSMB.

The following timelines will need to be met in order to have enough time to prepare and submit the report to the DSMB.

- Data quality review will be performed 6-8 weeks prior to the data of the planned DSMB meeting and any necessary queries raised.
- Study sites will be asked to review and respond to queries within 1-2 weeks



1 *WCHRI*

*Study: No OUCH*

2 *Study Title*

*Version: 1.0*

3 ***Data Management Plan***

*Date: 20 Mar 2019*

---

- 4
- 5 • 4-5 weeks before the DSMB meeting data will be exported and provided to the statistician for
  - 6 preparation of the DSMB reports.
- 7

## 8 **Archiving and Destruction**

9 After study completion all study materials will be returned to the Principal Investigator / Sponsor for

10 archiving.

11 Electronic data will be retained in WCHRI secure systems until such time as these systems are

12 decommissioned or until the Principal Investigator requests their deletion.

13

14

15

16

17

18

19

20

21

22

23

24

25

26

27

28

29

30

31

32

33

34

35

36

37

38

39

40

41

42

43

44

45

46

47

48

49

50

51

52

53

54

55

56

57

58

59

60

WCHRI  
 Study Title  
 Data Management Plan

Study: No OUCH  
 Version: 1.0  
 Date: 20 Mar 2019

## Tasks and Responsibilities

These are summarized in the following table:

| Task                        | Responsibility   | Notes |
|-----------------------------|------------------|-------|
| CRF design                  | PI               |       |
| Database configuration      | WCHRI            |       |
| Database documentation      | WCHRI            |       |
| Database acceptance testing | WCHRI / PI       |       |
| Monitoring                  | CRU              |       |
| Document flow and tracking  | N/A              |       |
| Data entry                  | Study sites      |       |
| Data validation             | WCHRI            |       |
| Discrepancy resolution      | Study sites      |       |
| Data extract                | WCHRI            |       |
| Analysis database creation  | WCHRI            |       |
| DSMB Reports                | WCHRI            |       |
| Study materials archiving   | Study sites / PI |       |
| Data archiving              | PI               |       |

### Authorization:

Author:  
 (Signature)

*Pamela Marples* 

Date: *12 Apr 2019*

Authorized by:  
 (PI or Sponsor)

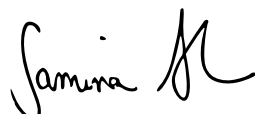

Dr. Samina Ali

Date:

15 April 2019

# Reporting checklist for protocol of a clinical trial.

|                                 |                                                                  | Reporting Item                                                                                                                                                                                                                                                                                                              | Page Number |
|---------------------------------|------------------------------------------------------------------|-----------------------------------------------------------------------------------------------------------------------------------------------------------------------------------------------------------------------------------------------------------------------------------------------------------------------------|-------------|
| 1<br>2<br>3<br>4<br>5<br>6<br>7 |                                                                  |                                                                                                                                                                                                                                                                                                                             |             |
| 8                               |                                                                  |                                                                                                                                                                                                                                                                                                                             |             |
| 9                               |                                                                  |                                                                                                                                                                                                                                                                                                                             |             |
| 10                              | Title                                                            | <a href="#">#1</a> Descriptive title identifying the study design,<br>population, interventions, and, if applicable, trial<br>acronym                                                                                                                                                                                       | 1           |
| 11                              |                                                                  |                                                                                                                                                                                                                                                                                                                             |             |
| 12                              |                                                                  |                                                                                                                                                                                                                                                                                                                             |             |
| 13                              |                                                                  |                                                                                                                                                                                                                                                                                                                             |             |
| 14                              |                                                                  |                                                                                                                                                                                                                                                                                                                             |             |
| 15                              | Trial registration                                               | <a href="#">#2a</a> Trial identifier and registry name. If not yet<br>registered, name of intended registry                                                                                                                                                                                                                 | 2           |
| 16                              |                                                                  |                                                                                                                                                                                                                                                                                                                             |             |
| 17                              |                                                                  |                                                                                                                                                                                                                                                                                                                             |             |
| 18                              |                                                                  |                                                                                                                                                                                                                                                                                                                             |             |
| 19                              | Trial registration:<br>data set                                  | <a href="#">#2b</a> All items from the World Health Organization<br>Trial Registration Data Set                                                                                                                                                                                                                             | Table 1     |
| 20                              |                                                                  |                                                                                                                                                                                                                                                                                                                             |             |
| 21                              |                                                                  |                                                                                                                                                                                                                                                                                                                             |             |
| 22                              |                                                                  |                                                                                                                                                                                                                                                                                                                             |             |
| 23                              | Protocol version                                                 | <a href="#">#3</a> Date and version identifier                                                                                                                                                                                                                                                                              | 2           |
| 24                              |                                                                  |                                                                                                                                                                                                                                                                                                                             |             |
| 25                              |                                                                  |                                                                                                                                                                                                                                                                                                                             |             |
| 26                              | Funding                                                          | <a href="#">#4</a> Sources and types of financial, material, and<br>other support                                                                                                                                                                                                                                           | 14          |
| 27                              |                                                                  |                                                                                                                                                                                                                                                                                                                             |             |
| 28                              |                                                                  |                                                                                                                                                                                                                                                                                                                             |             |
| 29                              | Roles and<br>responsibilities:<br>contributorship                | <a href="#">#5a</a> Names, affiliations, and roles of protocol<br>contributors                                                                                                                                                                                                                                              | 3           |
| 30                              |                                                                  |                                                                                                                                                                                                                                                                                                                             |             |
| 31                              |                                                                  |                                                                                                                                                                                                                                                                                                                             |             |
| 32                              |                                                                  |                                                                                                                                                                                                                                                                                                                             |             |
| 33                              |                                                                  |                                                                                                                                                                                                                                                                                                                             |             |
| 34                              |                                                                  |                                                                                                                                                                                                                                                                                                                             |             |
| 35                              | Roles and<br>responsibilities:<br>sponsor contact<br>information | <a href="#">#5b</a> Name and contact information for the trial<br>sponsor                                                                                                                                                                                                                                                   | 14          |
| 36                              |                                                                  |                                                                                                                                                                                                                                                                                                                             |             |
| 37                              |                                                                  |                                                                                                                                                                                                                                                                                                                             |             |
| 38                              |                                                                  |                                                                                                                                                                                                                                                                                                                             |             |
| 39                              |                                                                  |                                                                                                                                                                                                                                                                                                                             |             |
| 40                              |                                                                  |                                                                                                                                                                                                                                                                                                                             |             |
| 41                              | Roles and<br>responsibilities:<br>sponsor and funder             | <a href="#">#5c</a> Role of study sponsor and funders, if any, in<br>study design; collection, management, analysis,<br>and interpretation of data; writing of the report;<br>and the decision to submit the report for<br>publication, including whether they will have<br>ultimate authority over any of these activities | 14          |
| 42                              |                                                                  |                                                                                                                                                                                                                                                                                                                             |             |
| 43                              |                                                                  |                                                                                                                                                                                                                                                                                                                             |             |
| 44                              |                                                                  |                                                                                                                                                                                                                                                                                                                             |             |
| 45                              |                                                                  |                                                                                                                                                                                                                                                                                                                             |             |
| 46                              |                                                                  |                                                                                                                                                                                                                                                                                                                             |             |
| 47                              |                                                                  |                                                                                                                                                                                                                                                                                                                             |             |
| 48                              |                                                                  |                                                                                                                                                                                                                                                                                                                             |             |
| 49                              |                                                                  |                                                                                                                                                                                                                                                                                                                             |             |
| 50                              |                                                                  |                                                                                                                                                                                                                                                                                                                             |             |
| 51                              | Roles and<br>responsibilities:<br>committees                     | <a href="#">#5d</a> Composition, roles, and responsibilities of the<br>coordinating centre, steering committee,<br>endpoint adjudication committee, data<br>management team, and other individuals or                                                                                                                       | 12-13       |
| 52                              |                                                                  |                                                                                                                                                                                                                                                                                                                             |             |
| 53                              |                                                                  |                                                                                                                                                                                                                                                                                                                             |             |
| 54                              |                                                                  |                                                                                                                                                                                                                                                                                                                             |             |
| 55                              |                                                                  |                                                                                                                                                                                                                                                                                                                             |             |
| 56                              |                                                                  |                                                                                                                                                                                                                                                                                                                             |             |
| 57                              |                                                                  |                                                                                                                                                                                                                                                                                                                             |             |
| 58                              |                                                                  |                                                                                                                                                                                                                                                                                                                             |             |
| 59                              |                                                                  |                                                                                                                                                                                                                                                                                                                             |             |
| 60                              |                                                                  |                                                                                                                                                                                                                                                                                                                             |             |

groups overseeing the trial, if applicable (see Item 21a for data monitoring committee)

|    |                      |                      |                                                       |
|----|----------------------|----------------------|-------------------------------------------------------|
| 1  |                      |                      |                                                       |
| 2  |                      |                      |                                                       |
| 3  |                      |                      |                                                       |
| 4  | Background and       | <a href="#">#6a</a>  | Description of research question and justification    |
| 5  | rationale            |                      | for undertaking the trial, including summary of       |
| 6  |                      |                      | relevant studies (published and unpublished)          |
| 7  |                      |                      | examining benefits and harms for each                 |
| 8  |                      |                      | intervention                                          |
| 9  |                      |                      |                                                       |
| 10 |                      |                      |                                                       |
| 11 |                      |                      |                                                       |
| 12 | Background and       | <a href="#">#6b</a>  | Explanation for choice of comparators                 |
| 13 | rationale: choice of |                      |                                                       |
| 14 | comparators          |                      |                                                       |
| 15 |                      |                      |                                                       |
| 16 |                      |                      |                                                       |
| 17 | Objectives           | <a href="#">#7</a>   | Specific objectives or hypotheses                     |
| 18 |                      |                      |                                                       |
| 19 |                      |                      |                                                       |
| 20 | Trial design         | <a href="#">#8</a>   | Description of trial design including type of trial   |
| 21 |                      |                      | (eg, parallel group, crossover, factorial, single     |
| 22 |                      |                      | group), allocation ratio, and framework (eg,          |
| 23 |                      |                      | superiority, equivalence, non-inferiority,            |
| 24 |                      |                      | exploratory)                                          |
| 25 |                      |                      |                                                       |
| 26 |                      |                      |                                                       |
| 27 |                      |                      |                                                       |
| 28 | Study setting        | <a href="#">#9</a>   | Description of study settings (eg, community          |
| 29 |                      |                      | clinic, academic hospital) and list of countries      |
| 30 |                      |                      | where data will be collected. Reference to where      |
| 31 |                      |                      | list of study sites can be obtained                   |
| 32 |                      |                      |                                                       |
| 33 |                      |                      |                                                       |
| 34 |                      |                      |                                                       |
| 35 | Eligibility criteria | <a href="#">#10</a>  | Inclusion and exclusion criteria for participants.    |
| 36 |                      |                      | If applicable, eligibility criteria for study centres |
| 37 |                      |                      | and individuals who will perform the                  |
| 38 |                      |                      | interventions (eg, surgeons, psychotherapists)        |
| 39 |                      |                      |                                                       |
| 40 |                      |                      |                                                       |
| 41 |                      |                      |                                                       |
| 42 | Interventions:       | <a href="#">#11a</a> | Interventions for each group with sufficient          |
| 43 | description          |                      | detail to allow replication, including how and        |
| 44 |                      |                      | when they will be administered                        |
| 45 |                      |                      |                                                       |
| 46 |                      |                      |                                                       |
| 47 | Interventions:       | <a href="#">#11b</a> | Criteria for discontinuing or modifying allocated     |
| 48 | modifications        |                      | interventions for a given trial participant (eg,      |
| 49 |                      |                      | drug dose change in response to harms,                |
| 50 |                      |                      | participant request, or improving / worsening         |
| 51 |                      |                      | disease)                                              |
| 52 |                      |                      |                                                       |
| 53 |                      |                      |                                                       |
| 54 |                      |                      |                                                       |
| 55 |                      |                      |                                                       |
| 56 |                      |                      |                                                       |
| 57 |                      |                      |                                                       |
| 58 |                      |                      |                                                       |
| 59 |                      |                      |                                                       |
| 60 |                      |                      |                                                       |

|    |                      |                      |                                                    |                   |
|----|----------------------|----------------------|----------------------------------------------------|-------------------|
| 1  | Interventions:       | <a href="#">#11c</a> | Strategies to improve adherence to intervention    | 9                 |
| 2  | adherence            |                      | protocols, and any procedures for monitoring       |                   |
| 3  |                      |                      | adherence (eg, drug tablet return; laboratory      |                   |
| 4  |                      |                      | tests)                                             |                   |
| 5  |                      |                      |                                                    |                   |
| 6  |                      |                      |                                                    |                   |
| 7  |                      |                      |                                                    |                   |
| 8  | Interventions:       | <a href="#">#11d</a> | Relevant concomitant care and interventions that   | 8                 |
| 9  | concomitant care     |                      | are permitted or prohibited during the trial       |                   |
| 10 |                      |                      |                                                    |                   |
| 11 |                      |                      |                                                    |                   |
| 12 | Outcomes             | <a href="#">#12</a>  | Primary, secondary, and other outcomes,            | 10-11             |
| 13 |                      |                      | including the specific measurement variable (eg,   |                   |
| 14 |                      |                      | systolic blood pressure), analysis metric (eg,     |                   |
| 15 |                      |                      | change from baseline, final value, time to event), |                   |
| 16 |                      |                      | method of aggregation (eg, median, proportion),    |                   |
| 17 |                      |                      | and time point for each outcome. Explanation of    |                   |
| 18 |                      |                      | the clinical relevance of chosen efficacy and      |                   |
| 19 |                      |                      | harm outcomes is strongly recommended              |                   |
| 20 |                      |                      |                                                    |                   |
| 21 |                      |                      |                                                    |                   |
| 22 |                      |                      |                                                    |                   |
| 23 |                      |                      |                                                    |                   |
| 24 |                      |                      |                                                    |                   |
| 25 | Participant timeline | <a href="#">#13</a>  | Time schedule of enrolment, interventions          | 9-10 and Figure 2 |
| 26 |                      |                      | (including any run-ins and washouts),              |                   |
| 27 |                      |                      | assessments, and visits for participants. A        |                   |
| 28 |                      |                      | schematic diagram is highly recommended (see       |                   |
| 29 |                      |                      | Figure)                                            |                   |
| 30 |                      |                      |                                                    |                   |
| 31 |                      |                      |                                                    |                   |
| 32 |                      |                      |                                                    |                   |
| 33 | Sample size          | <a href="#">#14</a>  | Estimated number of participants needed to         | 11                |
| 34 |                      |                      | achieve study objectives and how it was            |                   |
| 35 |                      |                      | determined, including clinical and statistical     |                   |
| 36 |                      |                      | assumptions supporting any sample size             |                   |
| 37 |                      |                      | calculations                                       |                   |
| 38 |                      |                      |                                                    |                   |
| 39 |                      |                      |                                                    |                   |
| 40 |                      |                      |                                                    |                   |
| 41 | Recruitment          | <a href="#">#15</a>  | Strategies for achieving adequate participant      | 10                |
| 42 |                      |                      | enrolment to reach target sample size              |                   |
| 43 |                      |                      |                                                    |                   |
| 44 |                      |                      |                                                    |                   |
| 45 | Allocation: sequence | <a href="#">#16a</a> | Method of generating the allocation sequence       | 8-9               |
| 46 | generation           |                      | (eg, computer-generated random numbers), and       |                   |
| 47 |                      |                      | list of any factors for stratification. To reduce  |                   |
| 48 |                      |                      | predictability of a random sequence, details of    |                   |
| 49 |                      |                      | any planned restriction (eg, blocking) should be   |                   |
| 50 |                      |                      | provided in a separate document that is            |                   |
| 51 |                      |                      | unavailable to those who enrol participants or     |                   |
| 52 |                      |                      | assign interventions                               |                   |
| 53 |                      |                      |                                                    |                   |
| 54 |                      |                      |                                                    |                   |
| 55 |                      |                      |                                                    |                   |
| 56 |                      |                      |                                                    |                   |
| 57 |                      |                      |                                                    |                   |
| 58 |                      |                      |                                                    |                   |
| 59 |                      |                      |                                                    |                   |
| 60 |                      |                      |                                                    |                   |

|    |                       |                      |                                                    |      |
|----|-----------------------|----------------------|----------------------------------------------------|------|
| 1  | Allocation            | <a href="#">#16b</a> | Mechanism of implementing the allocation           | 8    |
| 2  | concealment           |                      | sequence (eg, central telephone; sequentially      |      |
| 3  | mechanism             |                      | numbered, opaque, sealed envelopes), describing    |      |
| 4  |                       |                      | any steps to conceal the sequence until            |      |
| 5  |                       |                      | interventions are assigned                         |      |
| 6  |                       |                      |                                                    |      |
| 7  |                       |                      |                                                    |      |
| 8  |                       |                      |                                                    |      |
| 9  | Allocation:           | <a href="#">#16c</a> | Who will generate the allocation sequence, who     | 8    |
| 10 | implementation        |                      | will enrol participants, and who will assign       |      |
| 11 |                       |                      | participants to interventions                      |      |
| 12 |                       |                      |                                                    |      |
| 13 |                       |                      |                                                    |      |
| 14 | Blinding (masking)    | <a href="#">#17a</a> | Who will be blinded after assignment to            | 8-9  |
| 15 |                       |                      | interventions (eg, trial participants, care        |      |
| 16 |                       |                      | providers, outcome assessors, data analysts), and  |      |
| 17 |                       |                      | how                                                |      |
| 18 |                       |                      |                                                    |      |
| 19 |                       |                      |                                                    |      |
| 20 |                       |                      |                                                    |      |
| 21 | Blinding (masking):   | <a href="#">#17b</a> | If blinded, circumstances under which              | 8-9  |
| 22 | emergency             |                      | unblinding is permissible, and procedure for       |      |
| 23 | unblinding            |                      | revealing a participant's allocated intervention   |      |
| 24 |                       |                      | during the trial                                   |      |
| 25 |                       |                      |                                                    |      |
| 26 |                       |                      |                                                    |      |
| 27 |                       |                      |                                                    |      |
| 28 | Data collection plan  | <a href="#">#18a</a> | Plans for assessment and collection of outcome,    | 9-10 |
| 29 |                       |                      | baseline, and other trial data, including any      |      |
| 30 |                       |                      | related processes to promote data quality (eg,     |      |
| 31 |                       |                      | duplicate measurements, training of assessors)     |      |
| 32 |                       |                      | and a description of study instruments (eg,        |      |
| 33 |                       |                      | questionnaires, laboratory tests) along with their |      |
| 34 |                       |                      | reliability and validity, if known. Reference to   |      |
| 35 |                       |                      | where data collection forms can be found, if not   |      |
| 36 |                       |                      | in the protocol                                    |      |
| 37 |                       |                      |                                                    |      |
| 38 |                       |                      |                                                    |      |
| 39 |                       |                      |                                                    |      |
| 40 |                       |                      |                                                    |      |
| 41 |                       |                      |                                                    |      |
| 42 | Data collection plan: | <a href="#">#18b</a> | Plans to promote participant retention and         | 10   |
| 43 | retention             |                      | complete follow-up, including list of any          |      |
| 44 |                       |                      | outcome data to be collected for participants      |      |
| 45 |                       |                      | who discontinue or deviate from intervention       |      |
| 46 |                       |                      | protocols                                          |      |
| 47 |                       |                      |                                                    |      |
| 48 |                       |                      |                                                    |      |
| 49 |                       |                      |                                                    |      |
| 50 |                       |                      |                                                    |      |
| 51 |                       |                      |                                                    |      |
| 52 |                       |                      |                                                    |      |
| 53 |                       |                      |                                                    |      |
| 54 |                       |                      |                                                    |      |
| 55 |                       |                      |                                                    |      |
| 56 |                       |                      |                                                    |      |
| 57 |                       |                      |                                                    |      |
| 58 |                       |                      |                                                    |      |
| 59 |                       |                      |                                                    |      |
| 60 |                       |                      |                                                    |      |

And Appendix 2 for Case  
Report Form

|    |                                                  |                      |                                                                                                                                                                                                                                                                                                                                       |                                                  |
|----|--------------------------------------------------|----------------------|---------------------------------------------------------------------------------------------------------------------------------------------------------------------------------------------------------------------------------------------------------------------------------------------------------------------------------------|--------------------------------------------------|
| 1  | Data management                                  | <a href="#">#19</a>  | Plans for data entry, coding, security, and storage, including any related processes to promote data quality (eg, double data entry; range checks for data values). Reference to where details of data management procedures can be found, if not in the protocol                                                                     | 12-13<br>And Appendix 3 for data management plan |
| 2  |                                                  |                      |                                                                                                                                                                                                                                                                                                                                       |                                                  |
| 3  |                                                  |                      |                                                                                                                                                                                                                                                                                                                                       |                                                  |
| 4  |                                                  |                      |                                                                                                                                                                                                                                                                                                                                       |                                                  |
| 5  |                                                  |                      |                                                                                                                                                                                                                                                                                                                                       |                                                  |
| 6  |                                                  |                      |                                                                                                                                                                                                                                                                                                                                       |                                                  |
| 7  |                                                  |                      |                                                                                                                                                                                                                                                                                                                                       |                                                  |
| 8  |                                                  |                      |                                                                                                                                                                                                                                                                                                                                       |                                                  |
| 9  |                                                  |                      |                                                                                                                                                                                                                                                                                                                                       |                                                  |
| 10 |                                                  |                      |                                                                                                                                                                                                                                                                                                                                       |                                                  |
| 11 |                                                  |                      |                                                                                                                                                                                                                                                                                                                                       |                                                  |
| 12 |                                                  |                      |                                                                                                                                                                                                                                                                                                                                       |                                                  |
| 13 | Statistics: outcomes                             | <a href="#">#20a</a> | Statistical methods for analysing primary and secondary outcomes. Reference to where other details of the statistical analysis plan can be found, if not in the protocol                                                                                                                                                              | 11-12                                            |
| 14 |                                                  |                      |                                                                                                                                                                                                                                                                                                                                       |                                                  |
| 15 |                                                  |                      |                                                                                                                                                                                                                                                                                                                                       |                                                  |
| 16 |                                                  |                      |                                                                                                                                                                                                                                                                                                                                       |                                                  |
| 17 |                                                  |                      |                                                                                                                                                                                                                                                                                                                                       |                                                  |
| 18 |                                                  |                      |                                                                                                                                                                                                                                                                                                                                       |                                                  |
| 19 |                                                  |                      |                                                                                                                                                                                                                                                                                                                                       |                                                  |
| 20 | Statistics: additional analyses                  | <a href="#">#20b</a> | Methods for any additional analyses (eg, subgroup and adjusted analyses)                                                                                                                                                                                                                                                              | 11-12                                            |
| 21 |                                                  |                      |                                                                                                                                                                                                                                                                                                                                       |                                                  |
| 22 |                                                  |                      |                                                                                                                                                                                                                                                                                                                                       |                                                  |
| 23 |                                                  |                      |                                                                                                                                                                                                                                                                                                                                       |                                                  |
| 24 | Statistics: analysis population and missing data | <a href="#">#20c</a> | Definition of analysis population relating to protocol non-adherence (eg, as randomised analysis), and any statistical methods to handle missing data (eg, multiple imputation)                                                                                                                                                       | 11-12                                            |
| 25 |                                                  |                      |                                                                                                                                                                                                                                                                                                                                       |                                                  |
| 26 |                                                  |                      |                                                                                                                                                                                                                                                                                                                                       |                                                  |
| 27 |                                                  |                      |                                                                                                                                                                                                                                                                                                                                       |                                                  |
| 28 |                                                  |                      |                                                                                                                                                                                                                                                                                                                                       |                                                  |
| 29 |                                                  |                      |                                                                                                                                                                                                                                                                                                                                       |                                                  |
| 30 |                                                  |                      |                                                                                                                                                                                                                                                                                                                                       |                                                  |
| 31 | Data monitoring: formal committee                | <a href="#">#21a</a> | Composition of data monitoring committee (DMC); summary of its role and reporting structure; statement of whether it is independent from the sponsor and competing interests; and reference to where further details about its charter can be found, if not in the protocol. Alternatively, an explanation of why a DMC is not needed | 13<br>and Appendix 4 for DSMB charter            |
| 32 |                                                  |                      |                                                                                                                                                                                                                                                                                                                                       |                                                  |
| 33 |                                                  |                      |                                                                                                                                                                                                                                                                                                                                       |                                                  |
| 34 |                                                  |                      |                                                                                                                                                                                                                                                                                                                                       |                                                  |
| 35 |                                                  |                      |                                                                                                                                                                                                                                                                                                                                       |                                                  |
| 36 |                                                  |                      |                                                                                                                                                                                                                                                                                                                                       |                                                  |
| 37 |                                                  |                      |                                                                                                                                                                                                                                                                                                                                       |                                                  |
| 38 |                                                  |                      |                                                                                                                                                                                                                                                                                                                                       |                                                  |
| 39 |                                                  |                      |                                                                                                                                                                                                                                                                                                                                       |                                                  |
| 40 |                                                  |                      |                                                                                                                                                                                                                                                                                                                                       |                                                  |
| 41 |                                                  |                      |                                                                                                                                                                                                                                                                                                                                       |                                                  |
| 42 |                                                  |                      |                                                                                                                                                                                                                                                                                                                                       |                                                  |
| 43 | Data monitoring: interim analysis                | <a href="#">#21b</a> | Description of any interim analyses and stopping guidelines, including who will have access to these interim results and make the final decision to terminate the trial                                                                                                                                                               | 12                                               |
| 44 |                                                  |                      |                                                                                                                                                                                                                                                                                                                                       |                                                  |
| 45 |                                                  |                      |                                                                                                                                                                                                                                                                                                                                       |                                                  |
| 46 |                                                  |                      |                                                                                                                                                                                                                                                                                                                                       |                                                  |
| 47 |                                                  |                      |                                                                                                                                                                                                                                                                                                                                       |                                                  |
| 48 |                                                  |                      |                                                                                                                                                                                                                                                                                                                                       |                                                  |
| 49 |                                                  |                      |                                                                                                                                                                                                                                                                                                                                       |                                                  |
| 50 | Harms                                            | <a href="#">#22</a>  | Plans for collecting, assessing, reporting, and managing solicited and spontaneously reported adverse events and other unintended effects of trial interventions or trial conduct                                                                                                                                                     | 10-11                                            |
| 51 |                                                  |                      |                                                                                                                                                                                                                                                                                                                                       |                                                  |
| 52 |                                                  |                      |                                                                                                                                                                                                                                                                                                                                       |                                                  |
| 53 |                                                  |                      |                                                                                                                                                                                                                                                                                                                                       |                                                  |
| 54 |                                                  |                      |                                                                                                                                                                                                                                                                                                                                       |                                                  |
| 55 |                                                  |                      |                                                                                                                                                                                                                                                                                                                                       |                                                  |
| 56 |                                                  |                      |                                                                                                                                                                                                                                                                                                                                       |                                                  |
| 57 |                                                  |                      |                                                                                                                                                                                                                                                                                                                                       |                                                  |
| 58 |                                                  |                      |                                                                                                                                                                                                                                                                                                                                       |                                                  |
| 59 |                                                  |                      |                                                                                                                                                                                                                                                                                                                                       |                                                  |
| 60 |                                                  |                      |                                                                                                                                                                                                                                                                                                                                       |                                                  |

|    |                                      |                      |                                                                                                                                                                                                                                    |                       |
|----|--------------------------------------|----------------------|------------------------------------------------------------------------------------------------------------------------------------------------------------------------------------------------------------------------------------|-----------------------|
| 1  | Auditing                             | <a href="#">#23</a>  | Frequency and procedures for auditing trial conduct, if any, and whether the process will be independent from investigators and the sponsor                                                                                        | 13                    |
| 2  |                                      |                      |                                                                                                                                                                                                                                    |                       |
| 3  |                                      |                      |                                                                                                                                                                                                                                    |                       |
| 4  |                                      |                      |                                                                                                                                                                                                                                    |                       |
| 5  |                                      |                      |                                                                                                                                                                                                                                    |                       |
| 6  | Research ethics approval             | <a href="#">#24</a>  | Plans for seeking research ethics committee / institutional review board (REC / IRB) approval                                                                                                                                      | 13-14                 |
| 7  |                                      |                      |                                                                                                                                                                                                                                    |                       |
| 8  |                                      |                      |                                                                                                                                                                                                                                    |                       |
| 9  |                                      |                      |                                                                                                                                                                                                                                    |                       |
| 10 | Protocol amendments                  | <a href="#">#25</a>  | Plans for communicating important protocol modifications (eg, changes to eligibility criteria, outcomes, analyses) to relevant parties (eg, investigators, REC / IRBs, trial participants, trial registries, journals, regulators) | 14                    |
| 11 |                                      |                      |                                                                                                                                                                                                                                    |                       |
| 12 |                                      |                      |                                                                                                                                                                                                                                    |                       |
| 13 |                                      |                      |                                                                                                                                                                                                                                    |                       |
| 14 |                                      |                      |                                                                                                                                                                                                                                    |                       |
| 15 |                                      |                      |                                                                                                                                                                                                                                    |                       |
| 16 |                                      |                      |                                                                                                                                                                                                                                    |                       |
| 17 |                                      |                      |                                                                                                                                                                                                                                    |                       |
| 18 | Consent or assent                    | <a href="#">#26a</a> | Who will obtain informed consent or assent from potential trial participants or authorised surrogates, and how (see Item 32)                                                                                                       | 9, 14, and Appendix 1 |
| 19 |                                      |                      |                                                                                                                                                                                                                                    |                       |
| 20 |                                      |                      |                                                                                                                                                                                                                                    |                       |
| 21 |                                      |                      |                                                                                                                                                                                                                                    |                       |
| 22 |                                      |                      |                                                                                                                                                                                                                                    |                       |
| 23 |                                      |                      |                                                                                                                                                                                                                                    |                       |
| 24 | Consent or assent: ancillary studies | <a href="#">#26b</a> | Additional consent provisions for collection and use of participant data and biological specimens in ancillary studies, if applicable                                                                                              | N/A                   |
| 25 |                                      |                      |                                                                                                                                                                                                                                    |                       |
| 26 |                                      |                      |                                                                                                                                                                                                                                    |                       |
| 27 |                                      |                      |                                                                                                                                                                                                                                    |                       |
| 28 |                                      |                      |                                                                                                                                                                                                                                    |                       |
| 29 | Confidentiality                      | <a href="#">#27</a>  | How personal information about potential and enrolled participants will be collected, shared, and maintained in order to protect confidentiality before, during, and after the trial                                               | 12-13                 |
| 30 |                                      |                      |                                                                                                                                                                                                                                    |                       |
| 31 |                                      |                      |                                                                                                                                                                                                                                    |                       |
| 32 |                                      |                      |                                                                                                                                                                                                                                    |                       |
| 33 |                                      |                      |                                                                                                                                                                                                                                    |                       |
| 34 |                                      |                      |                                                                                                                                                                                                                                    |                       |
| 35 |                                      |                      |                                                                                                                                                                                                                                    |                       |
| 36 | Declaration of interests             | <a href="#">#28</a>  | Financial and other competing interests for principal investigators for the overall trial and each study site                                                                                                                      | 3 and 14              |
| 37 |                                      |                      |                                                                                                                                                                                                                                    |                       |
| 38 |                                      |                      |                                                                                                                                                                                                                                    |                       |
| 39 |                                      |                      |                                                                                                                                                                                                                                    |                       |
| 40 |                                      |                      |                                                                                                                                                                                                                                    |                       |
| 41 | Data access                          | <a href="#">#29</a>  | Statement of who will have access to the final trial dataset, and disclosure of contractual agreements that limit such access for investigators                                                                                    | Table 1               |
| 42 |                                      |                      |                                                                                                                                                                                                                                    |                       |
| 43 |                                      |                      |                                                                                                                                                                                                                                    |                       |
| 44 |                                      |                      |                                                                                                                                                                                                                                    |                       |
| 45 |                                      |                      |                                                                                                                                                                                                                                    |                       |
| 46 |                                      |                      |                                                                                                                                                                                                                                    |                       |
| 47 |                                      |                      |                                                                                                                                                                                                                                    |                       |
| 48 | Ancillary and post trial care        | <a href="#">#30</a>  | Provisions, if any, for ancillary and post-trial care, and for compensation to those who suffer harm from trial participation                                                                                                      | N/A                   |
| 49 |                                      |                      |                                                                                                                                                                                                                                    |                       |
| 50 |                                      |                      |                                                                                                                                                                                                                                    |                       |
| 51 |                                      |                      |                                                                                                                                                                                                                                    |                       |
| 52 |                                      |                      |                                                                                                                                                                                                                                    |                       |
| 53 |                                      |                      |                                                                                                                                                                                                                                    |                       |
| 54 | Dissemination policy: trial results  | <a href="#">#31a</a> | Plans for investigators and sponsor to communicate trial results to participants, healthcare professionals, the public, and other relevant groups (eg, via publication, reporting in                                               | 14                    |
| 55 |                                      |                      |                                                                                                                                                                                                                                    |                       |
| 56 |                                      |                      |                                                                                                                                                                                                                                    |                       |
| 57 |                                      |                      |                                                                                                                                                                                                                                    |                       |
| 58 |                                      |                      |                                                                                                                                                                                                                                    |                       |
| 59 |                                      |                      |                                                                                                                                                                                                                                    |                       |
| 60 |                                      |                      |                                                                                                                                                                                                                                    |                       |



1 results databases, or other data sharing  
 2 arrangements), including any publication  
 3 restrictions  
 4

|    |                      |                      |                                                  |                |
|----|----------------------|----------------------|--------------------------------------------------|----------------|
| 5  | 3Dissemination       | <a href="#">#31b</a> | Authorship eligibility guidelines and any        | 14             |
| 6  | policy: authorship   |                      | intended use of professional writers             |                |
| 7  |                      |                      |                                                  |                |
| 8  |                      |                      |                                                  |                |
| 9  | Dissemination        | <a href="#">#31c</a> | Plans, if any, for granting public access to the | 14 and Table 1 |
| 10 | policy: reproducible |                      | full protocol, participant-level dataset, and    |                |
| 11 | research             |                      | statistical code                                 |                |
| 12 |                      |                      |                                                  |                |
| 13 |                      |                      |                                                  |                |
| 14 | Informed consent     | <a href="#">#32</a>  | Model consent form and other related             | Appendix 1     |
| 15 | materials            |                      | documentation given to participants and          |                |
| 16 |                      |                      | authorised surrogates                            |                |
| 17 |                      |                      |                                                  |                |
| 18 |                      |                      |                                                  |                |
| 19 |                      |                      |                                                  |                |
| 20 | Biological           | <a href="#">#33</a>  | Plans for collection, laboratory evaluation, and | N/A            |
| 21 | specimens            |                      | storage of biological specimens for genetic or   |                |
| 22 |                      |                      | molecular analysis in the current trial and for  |                |
| 23 |                      |                      | future use in ancillary studies, if applicable   |                |
| 24 |                      |                      |                                                  |                |
| 25 |                      |                      |                                                  |                |
| 26 |                      |                      |                                                  |                |

27 The SPIRIT checklist is distributed under the terms of the Creative Commons Attribution License CC-BY-ND  
 28 3.0. This checklist can be completed online using <https://www.goodreports.org/>, a tool made by the [EQUATOR](#)  
 29 [Network](#) in collaboration with [Penelope.ai](#)  
 30

# Reporting checklist for protocol of a clinical trial (SPIRIT-PRO Elaborations only).

|                                           |                                             | SPIRIT-PRO Elaboration                                                                                                                                                                                                                                                                                                                                                                                                                                      | Page Number     |
|-------------------------------------------|---------------------------------------------|-------------------------------------------------------------------------------------------------------------------------------------------------------------------------------------------------------------------------------------------------------------------------------------------------------------------------------------------------------------------------------------------------------------------------------------------------------------|-----------------|
| 1<br>2<br>3<br>4<br>5<br>6<br>7<br>8<br>9 |                                             |                                                                                                                                                                                                                                                                                                                                                                                                                                                             |                 |
| 10                                        |                                             |                                                                                                                                                                                                                                                                                                                                                                                                                                                             |                 |
| 11                                        |                                             |                                                                                                                                                                                                                                                                                                                                                                                                                                                             |                 |
| 12                                        | Roles and responsibilities: contributorship | <a href="#">#5a</a> Specify the individual(s) responsible for the PRO content of the trial protocol.                                                                                                                                                                                                                                                                                                                                                        | 3               |
| 13                                        |                                             |                                                                                                                                                                                                                                                                                                                                                                                                                                                             |                 |
| 14                                        |                                             |                                                                                                                                                                                                                                                                                                                                                                                                                                                             |                 |
| 15                                        |                                             |                                                                                                                                                                                                                                                                                                                                                                                                                                                             |                 |
| 16                                        |                                             |                                                                                                                                                                                                                                                                                                                                                                                                                                                             |                 |
| 17                                        |                                             |                                                                                                                                                                                                                                                                                                                                                                                                                                                             |                 |
| 18                                        | Background and rationale                    | <a href="#">#6a</a> Describe the PRO-specific research question and rationale for PRO assessment and summarize PRO findings in relevant studies.                                                                                                                                                                                                                                                                                                            | 10-11           |
| 19                                        |                                             |                                                                                                                                                                                                                                                                                                                                                                                                                                                             |                 |
| 20                                        |                                             |                                                                                                                                                                                                                                                                                                                                                                                                                                                             |                 |
| 21                                        |                                             |                                                                                                                                                                                                                                                                                                                                                                                                                                                             |                 |
| 22                                        |                                             |                                                                                                                                                                                                                                                                                                                                                                                                                                                             |                 |
| 23                                        | Background and rationale                    | <a href="#">#7</a> State specific PRO objectives or hypotheses (including relevant PRO concepts/domains).                                                                                                                                                                                                                                                                                                                                                   | 10-11           |
| 24                                        |                                             |                                                                                                                                                                                                                                                                                                                                                                                                                                                             |                 |
| 25                                        |                                             |                                                                                                                                                                                                                                                                                                                                                                                                                                                             |                 |
| 26                                        |                                             |                                                                                                                                                                                                                                                                                                                                                                                                                                                             |                 |
| 27                                        | Trial Design                                | <a href="#">#10</a> Specify any PRO-specific eligibility criteria (eg, language/reading requirements or prerandomization completion of PRO). If PROs will not be collected from the entire study sample, provide a rationale and describe the method for obtaining the PRO subsample.                                                                                                                                                                       | 7               |
| 28                                        |                                             |                                                                                                                                                                                                                                                                                                                                                                                                                                                             |                 |
| 29                                        |                                             |                                                                                                                                                                                                                                                                                                                                                                                                                                                             |                 |
| 30                                        |                                             |                                                                                                                                                                                                                                                                                                                                                                                                                                                             |                 |
| 31                                        |                                             |                                                                                                                                                                                                                                                                                                                                                                                                                                                             |                 |
| 32                                        |                                             |                                                                                                                                                                                                                                                                                                                                                                                                                                                             |                 |
| 33                                        |                                             |                                                                                                                                                                                                                                                                                                                                                                                                                                                             |                 |
| 34                                        |                                             |                                                                                                                                                                                                                                                                                                                                                                                                                                                             |                 |
| 35                                        |                                             |                                                                                                                                                                                                                                                                                                                                                                                                                                                             |                 |
| 36                                        |                                             |                                                                                                                                                                                                                                                                                                                                                                                                                                                             |                 |
| 37                                        | Interventions: adherence                    | <a href="#">#12</a> Identify the PRO endpoint as the primary, secondary (and if so - whether a key/important secondary), or an exploratory endpoint. Specify the PRO concepts/ domains used to evaluate the intervention (eg, overall health- related quality of life, specific domain, specific symptom) and, for each one, the analysis metric (eg, change from baseline, final value, time to event) and the principal time point or period of interest. | 10-11           |
| 38                                        |                                             |                                                                                                                                                                                                                                                                                                                                                                                                                                                             |                 |
| 39                                        |                                             |                                                                                                                                                                                                                                                                                                                                                                                                                                                             |                 |
| 40                                        |                                             |                                                                                                                                                                                                                                                                                                                                                                                                                                                             |                 |
| 41                                        |                                             |                                                                                                                                                                                                                                                                                                                                                                                                                                                             |                 |
| 42                                        |                                             |                                                                                                                                                                                                                                                                                                                                                                                                                                                             |                 |
| 43                                        |                                             |                                                                                                                                                                                                                                                                                                                                                                                                                                                             |                 |
| 44                                        |                                             |                                                                                                                                                                                                                                                                                                                                                                                                                                                             |                 |
| 45                                        |                                             |                                                                                                                                                                                                                                                                                                                                                                                                                                                             |                 |
| 46                                        |                                             |                                                                                                                                                                                                                                                                                                                                                                                                                                                             |                 |
| 47                                        |                                             |                                                                                                                                                                                                                                                                                                                                                                                                                                                             |                 |
| 48                                        |                                             |                                                                                                                                                                                                                                                                                                                                                                                                                                                             |                 |
| 49                                        |                                             |                                                                                                                                                                                                                                                                                                                                                                                                                                                             |                 |
| 50                                        |                                             |                                                                                                                                                                                                                                                                                                                                                                                                                                                             |                 |
| 51                                        | Interventions: concomitant care             | <a href="#">#13</a> Include a schedule of PRO assessments, providing a rationale for the time points, and justifying if the initial assessment is not pre-randomization. Specify time windows, whether PRO collection is prior to clinical assessments, and, if using multiple                                                                                                                                                                              | 10-11, Figure 2 |
| 52                                        |                                             |                                                                                                                                                                                                                                                                                                                                                                                                                                                             |                 |
| 53                                        |                                             |                                                                                                                                                                                                                                                                                                                                                                                                                                                             |                 |
| 54                                        |                                             |                                                                                                                                                                                                                                                                                                                                                                                                                                                             |                 |
| 55                                        |                                             |                                                                                                                                                                                                                                                                                                                                                                                                                                                             |                 |
| 56                                        |                                             |                                                                                                                                                                                                                                                                                                                                                                                                                                                             |                 |
| 57                                        |                                             |                                                                                                                                                                                                                                                                                                                                                                                                                                                             |                 |
| 58                                        |                                             |                                                                                                                                                                                                                                                                                                                                                                                                                                                             |                 |
| 59                                        |                                             |                                                                                                                                                                                                                                                                                                                                                                                                                                                             |                 |
| 60                                        |                                             |                                                                                                                                                                                                                                                                                                                                                                                                                                                             |                 |

questionnaires, whether order of administration will be standardized.

|    |                 |                           |       |
|----|-----------------|---------------------------|-------|
| 1  |                 |                           |       |
| 2  |                 |                           |       |
| 3  |                 |                           |       |
| 4  | Outcomes        | <a href="#">#14</a>       | 11    |
| 5  |                 |                           |       |
| 6  |                 |                           |       |
| 7  |                 |                           |       |
| 8  |                 |                           |       |
| 9  |                 |                           |       |
| 10 |                 |                           |       |
| 11 |                 |                           |       |
| 12 |                 |                           |       |
| 13 |                 |                           |       |
| 14 | Methods         | <a href="#">#18a(i)</a>   | 10    |
| 15 |                 |                           |       |
| 16 |                 |                           |       |
| 17 |                 |                           |       |
| 18 |                 |                           |       |
| 19 |                 |                           |       |
| 20 |                 |                           |       |
| 21 |                 |                           |       |
| 22 |                 |                           |       |
| 23 |                 |                           |       |
| 24 |                 |                           |       |
| 25 |                 |                           |       |
| 26 |                 |                           |       |
| 27 |                 |                           |       |
| 28 |                 |                           |       |
| 29 |                 |                           |       |
| 30 | Data collection | <a href="#">#18a(ii)</a>  | 9, 12 |
| 31 |                 |                           |       |
| 32 |                 |                           |       |
| 33 |                 |                           |       |
| 34 |                 |                           |       |
| 35 |                 |                           |       |
| 36 |                 |                           |       |
| 37 | Data collection | <a href="#">#18a(iii)</a> | 10    |
| 38 |                 |                           |       |
| 39 |                 |                           |       |
| 40 |                 |                           |       |
| 41 |                 |                           |       |
| 42 |                 |                           |       |
| 43 |                 |                           |       |
| 44 |                 |                           |       |
| 45 |                 |                           |       |
| 46 | Data collection | <a href="#">#18a(iv)</a>  | N/A   |
| 47 |                 |                           |       |
| 48 |                 |                           |       |
| 49 |                 |                           |       |
| 50 |                 |                           |       |
| 51 |                 |                           |       |
| 52 |                 |                           |       |
| 53 |                 |                           |       |
| 54 | Data collection | <a href="#">#18b(i)</a>   | 9-10  |
| 55 |                 |                           |       |
| 56 |                 |                           |       |
| 57 |                 |                           |       |
| 58 |                 |                           |       |
| 59 |                 |                           |       |
| 60 |                 |                           |       |

|    |                 |                          |                                                         |                      |
|----|-----------------|--------------------------|---------------------------------------------------------|----------------------|
| 1  | Data Collection | <a href="#">#18b(ii)</a> | Describe the process of PRO assessment for              | 9                    |
| 2  |                 |                          | participants who discontinue or deviate from the        |                      |
| 3  |                 |                          | assigned intervention protocol.                         |                      |
| 4  |                 |                          |                                                         |                      |
| 5  |                 |                          |                                                         |                      |
| 6  | Statistics      | <a href="#">#20a</a>     | State PRO analysis methods, including any plans for     | 11-12                |
| 7  |                 |                          | addressing multiplicity/type I ( $\alpha$ ) error.      |                      |
| 8  |                 |                          |                                                         |                      |
| 9  |                 |                          |                                                         |                      |
| 10 | Statistics      | <a href="#">#20c</a>     | State how missing data will be described and outline    | 11-12                |
| 11 |                 |                          | the methods for handling missing items or entire        |                      |
| 12 |                 |                          | assessments (eg, approach to imputation and             |                      |
| 13 |                 |                          | sensitivity analyses).                                  |                      |
| 14 |                 |                          |                                                         |                      |
| 15 |                 |                          |                                                         |                      |
| 16 |                 |                          |                                                         |                      |
| 17 | Data monitoring | <a href="#">#22</a>      | State whether or not PRO data will be monitored         | N/A as single dose   |
| 18 |                 |                          | during the study to inform the clinical care of         | administration study |
| 19 |                 |                          | individual trial participants and, if so, how this will |                      |
| 20 |                 |                          | be managed in a standardized way. Describe how this     |                      |
| 21 |                 |                          | process will be explained to participants; eg, in the   |                      |
| 22 |                 |                          | participant information sheet and consent form.         |                      |
| 23 |                 |                          |                                                         |                      |
| 24 |                 |                          |                                                         |                      |
| 25 |                 |                          |                                                         |                      |
| 26 |                 |                          |                                                         |                      |
| 27 |                 |                          |                                                         |                      |
| 28 |                 |                          |                                                         |                      |
| 29 |                 |                          |                                                         |                      |
| 30 |                 |                          |                                                         |                      |
| 31 |                 |                          |                                                         |                      |
| 32 |                 |                          |                                                         |                      |
| 33 |                 |                          |                                                         |                      |
| 34 |                 |                          |                                                         |                      |
| 35 |                 |                          |                                                         |                      |
| 36 |                 |                          |                                                         |                      |
| 37 |                 |                          |                                                         |                      |
| 38 |                 |                          |                                                         |                      |
| 39 |                 |                          |                                                         |                      |
| 40 |                 |                          |                                                         |                      |
| 41 |                 |                          |                                                         |                      |
| 42 |                 |                          |                                                         |                      |
| 43 |                 |                          |                                                         |                      |
| 44 |                 |                          |                                                         |                      |
| 45 |                 |                          |                                                         |                      |
| 46 |                 |                          |                                                         |                      |
| 47 |                 |                          |                                                         |                      |
| 48 |                 |                          |                                                         |                      |
| 49 |                 |                          |                                                         |                      |
| 50 |                 |                          |                                                         |                      |
| 51 |                 |                          |                                                         |                      |
| 52 |                 |                          |                                                         |                      |
| 53 |                 |                          |                                                         |                      |
| 54 |                 |                          |                                                         |                      |
| 55 |                 |                          |                                                         |                      |
| 56 |                 |                          |                                                         |                      |
| 57 |                 |                          |                                                         |                      |
| 58 |                 |                          |                                                         |                      |
| 59 |                 |                          |                                                         |                      |
| 60 |                 |                          |                                                         |                      |

# BMJ Open

## A study protocol for two complementary trials of non-steroidal or opioid analgesia use for children aged 6 to 17 years with musculoskeletal injuries (The No OUCH Study)

|                                 |                                                                                                                                                                                                                                                                                                                                                                                                                                                                                                                                                                                                                                                                                                                                                                                                                                                                                                                                                                                                                                                                                                                                                                                                                       |
|---------------------------------|-----------------------------------------------------------------------------------------------------------------------------------------------------------------------------------------------------------------------------------------------------------------------------------------------------------------------------------------------------------------------------------------------------------------------------------------------------------------------------------------------------------------------------------------------------------------------------------------------------------------------------------------------------------------------------------------------------------------------------------------------------------------------------------------------------------------------------------------------------------------------------------------------------------------------------------------------------------------------------------------------------------------------------------------------------------------------------------------------------------------------------------------------------------------------------------------------------------------------|
| Journal:                        | <i>BMJ Open</i>                                                                                                                                                                                                                                                                                                                                                                                                                                                                                                                                                                                                                                                                                                                                                                                                                                                                                                                                                                                                                                                                                                                                                                                                       |
| Manuscript ID                   | bmjopen-2019-035177.R1                                                                                                                                                                                                                                                                                                                                                                                                                                                                                                                                                                                                                                                                                                                                                                                                                                                                                                                                                                                                                                                                                                                                                                                                |
| Article Type:                   | Protocol                                                                                                                                                                                                                                                                                                                                                                                                                                                                                                                                                                                                                                                                                                                                                                                                                                                                                                                                                                                                                                                                                                                                                                                                              |
| Date Submitted by the Author:   | 16-Mar-2020                                                                                                                                                                                                                                                                                                                                                                                                                                                                                                                                                                                                                                                                                                                                                                                                                                                                                                                                                                                                                                                                                                                                                                                                           |
| Complete List of Authors:       | Ali, Samina; University of Alberta, Pediatrics<br>Rajagopal, Manasi; University of Alberta, Pediatrics<br>Klassen, Terry; University of Manitoba, Children's Hospital Research Institute of Manitoba<br>Richer, Lawrence; University of Alberta, Pediatrics<br>McCabe, Christopher; University of Alberta, Department of Emergency Medicine Reserach<br>Willan, Andy; University of Toronto<br>Yaskina, Maryna; University of Alberta<br>Heath, Anna; SickKids,<br>Drendel, Amy; Medical College of Wisconsin, paediatrics and Emergency Medicine<br>Offringa, Martin; The Hospital for Sick Children, Child Health Evaluation Sciences<br>Gouin, Serge; CHU Ste.Justine, Emergency<br>Stang, Antonia; University of Calgary, Pediatrics; Alberta Children's Hospital, Pediatrics<br>Sawyer, Scott; University of Manitoba, Pediatrics and Emergency Medicine<br>Bhatt, Maala; University of Ottawa, Pediatrics; Children's Hospital of Eastern Ontario, Emergency Medicine<br>Hickes, Serena; University of Manitoba Children's Hospital Research Institute of Manitoba, Parent Partner<br>Poonai, Naveen; Schulich School of Medicine & Dentistry, London Health Sciences Centre, Paediatrics and Internal Medicine |
| <b>Primary Subject Heading</b>: | Paediatrics                                                                                                                                                                                                                                                                                                                                                                                                                                                                                                                                                                                                                                                                                                                                                                                                                                                                                                                                                                                                                                                                                                                                                                                                           |
| Secondary Subject Heading:      | Emergency medicine, Sports and exercise medicine                                                                                                                                                                                                                                                                                                                                                                                                                                                                                                                                                                                                                                                                                                                                                                                                                                                                                                                                                                                                                                                                                                                                                                      |
| Keywords:                       | Pain management < ANAESTHETICS, Paediatric orthopaedics < ORTHOPAEDIC & TRAUMA SURGERY, ACCIDENT & EMERGENCY MEDICINE                                                                                                                                                                                                                                                                                                                                                                                                                                                                                                                                                                                                                                                                                                                                                                                                                                                                                                                                                                                                                                                                                                 |
|                                 |                                                                                                                                                                                                                                                                                                                                                                                                                                                                                                                                                                                                                                                                                                                                                                                                                                                                                                                                                                                                                                                                                                                                                                                                                       |

1  
2  
3  
4  
5  
6  
7  
8  
9  
10  
11  
12  
13  
14  
15  
16  
17  
18  
19  
20  
21  
22  
23  
24  
25  
26  
27  
28  
29  
30  
31  
32  
33  
34  
35  
36  
37  
38  
39  
40  
41  
42  
43  
44  
45  
46  
47  
48  
49  
50  
51  
52  
53  
54  
55  
56  
57  
58  
59  
60

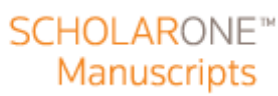



I, the Submitting Author has the right to grant and does grant on behalf of all authors of the Work (as defined in the below author licence), an exclusive licence and/or a non-exclusive licence for contributions from authors who are: i) UK Crown employees; ii) where BMJ has agreed a CC-BY licence shall apply, and/or iii) in accordance with the terms applicable for US Federal Government officers or employees acting as part of their official duties; on a worldwide, perpetual, irrevocable, royalty-free basis to BMJ Publishing Group Ltd ("BMJ") its licensees and where the relevant Journal is co-owned by BMJ to the co-owners of the Journal, to publish the Work in this journal and any other BMJ products and to exploit all rights, as set out in our [licence](#).

The Submitting Author accepts and understands that any supply made under these terms is made by BMJ to the Submitting Author unless you are acting as an employee on behalf of your employer or a postgraduate student of an affiliated institution which is paying any applicable article publishing charge ("APC") for Open Access articles. Where the Submitting Author wishes to make the Work available on an Open Access basis (and intends to pay the relevant APC), the terms of reuse of such Open Access shall be governed by a Creative Commons licence – details of these licences and which [Creative Commons](#) licence will apply to this Work are set out in our licence referred to above.

Other than as permitted in any relevant BMJ Author's Self Archiving Policies, I confirm this Work has not been accepted for publication elsewhere, is not being considered for publication elsewhere and does not duplicate material already published. I confirm all authors consent to publication of this Work and authorise the granting of this licence.

**Title:** A study protocol for two complementary trials of non-steroidal or opioid analgesia use for children aged 6 to 17 years with musculoskeletal injuries (The No OUCH Study)

**Lay Title:** Analgesia Use for Children with Musculoskeletal Injuries

**Authorship:** Samina Ali<sup>1,2,\*</sup>, Manasi Rajagopal<sup>1</sup>, Terry P. Klassen<sup>3,4</sup>, Lawrence Richer<sup>1,2</sup>, Christopher McCabe<sup>5,6</sup>, Andy Willan<sup>7,8</sup>, Maryna Yaskina<sup>2</sup>, Anna Heath<sup>9</sup>, Amy L. Drendel<sup>10</sup>, Martin Offringa<sup>11</sup>, Serge Gouin<sup>12</sup>, Antonia S. Stang<sup>13</sup>, Scott Sawyer<sup>14</sup>, Maala Bhatt<sup>15</sup>, Serena Hickee<sup>4</sup> and Naveen Poonai<sup>16,17</sup>, on behalf of the KidsCAN PERC Innovative Pediatric Clinical Trials No OUCH Study Team

1 Department of Pediatrics, Faculty of Medicine & Dentistry, University of Alberta, Edmonton, Alberta, Canada

2 Women & Children's Health Research Institute, Edmonton, Alberta, Canada

3 Max Rady College of Medicine, Pediatrics and Child Health, Rady Faculty of Health Sciences, University of Manitoba, Winnipeg, Manitoba, Canada

4 Children's Hospital Research Institute of Manitoba, Winnipeg, Manitoba, Canada

5 Department of Emergency Medicine, University of Alberta, Edmonton, Alberta, Canada

6 Institute of Health Economics, Edmonton, Alberta, Canada

7 Ontario Child Health Support Unit, Research Institute, Hospital for Sick Children, Toronto, Ontario, Canada

8 Dalla Lana School of Public Health, University of Toronto, Toronto, Ontario, Canada

9 The Hospital for Sick Children, Toronto, Ontario, Canada

10 Department of Pediatrics, Medical College of Wisconsin, Milwaukee, Wisconsin, USA

11 Child Health Evaluative Sciences, The Hospital for Sick Children, Toronto, Ontario

12 Departments of Pediatric Emergency Medicine & Pediatrics, CHU Ste-Justine, Université de Montréal, Montréal, Quebec, Canada

13 Department of Pediatrics, University of Calgary, Calgary, Alberta, Canada

14 Departments of Pediatrics and Emergency Medicine, Health Sciences Center, Winnipeg Children's Hospital, University of Manitoba, Winnipeg, Manitoba, Canada

15 Department of Pediatrics, University of Ottawa, Ottawa, Ontario, Canada

16 Department of Pediatrics & Internal Medicine, Schulich School of Medicine and Dentistry, London, Ontario, Canada

17 Children's Health Research Institute, London Health Sciences Centre, London, Ontario, Canada

\*denotes corresponding author, and contact for public and scientific inquiries

3-583 Edmonton Clinic Health Academy

11405 – 87 Avenue

Edmonton, AB T6G 1C9

Phone: (780) 248-5574

Fax: (888) 775-8876

Email: [sali@ualberta.ca](mailto:sali@ualberta.ca)



1  
2  
3 Keywords: pain, analgesia, fracture, musculoskeletal injury, pediatrics, emergency  
4 medicine, opioid  
5

6  
7 Trial Protocol Version 22/08/2019  
8 Trial Registration: clinicaltrials.gov NCT03767933  
9 WHO Trial Registration Data Set: See Table 1  
10

11  
12 Word Count: 4000/ 4000 words  
13  
14  
15  
16  
17  
18  
19  
20  
21  
22  
23  
24  
25  
26  
27  
28  
29  
30  
31  
32  
33  
34  
35  
36  
37  
38  
39  
40  
41  
42  
43  
44  
45  
46  
47  
48  
49  
50  
51  
52  
53  
54  
55  
56  
57  
58  
59  
60

For peer review only

## ABSTRACT

**Introduction.** Musculoskeletal (MSK) injuries are a frequent cause for emergency department (ED) visits in children. MSK injuries are associated with moderate to severe pain in most children, yet recent research confirms that the management of children's pain in the ED remains inadequate. Clinicians are seeking better oral analgesic options for MSK injury pain with demonstrated efficacy and an excellent safety profile. This study aims to determine the efficacy and safety of adding oral acetaminophen or oral hydromorphone to oral ibuprofen and interpret this information within the context of parent/caregiver preference.

**Methods and analysis.** Using a novel preference-informed complementary trial design, two simultaneous trials are being conducted. Parents/caregivers of children presenting to the ED with acute limb injury will be approached and decide which trial they wish to participate in: an opioid-inclusive trial or a non-opioid trial. Both trials will follow randomized, double-blind, placebo-controlled, superiority-trial methodology and will enroll a minimum of 536 children across six Canadian pediatric EDs. Children will be eligible if they are 6 to 17 years of age and present to the ED with an acute limb injury and a self-reported verbal Numerical Rating Scale pain score  $\geq 5$ . The primary objective is to determine the effectiveness of oral ibuprofen + oral hydromorphone versus oral ibuprofen + oral acetaminophen versus oral ibuprofen alone. Recruitment launched in April 2019.

**Ethics and dissemination.** This study has been approved by the Health Research Ethics Board (University of Alberta), and by appropriate ethics boards at all recruiting centers. Informed consent will be obtained from parents/guardians of all participants, in conjunction with assent from the participants themselves. Study data will be submitted for publication regardless of results. This study is funded through a Canadian Institutes of Health Research grant.

**Trial registration number:** NCT03767933, First registered December 07, 2018

**Words:** 296/ 300

## Article Summary

### Strengths and limitations of this study

1. This study employs a novel design involving two simultaneously run, complementary, randomized controlled trials.
2. Participating families will choose in which trial they wish to participate, thus engaging and empowering them as a key participant in healthcare research decision-making.
3. This study will collect preference and opinion data from families, in order to better understand their analgesic decision-making for their children.
4. We expect that some parents/caregivers will be hesitant to accept opioids thus leading to an imbalance in the pace of recruitment between the two trials.
5. Given the sample size, this study will not be able to provide definitive evidence regarding rare but serious adverse events.

## INTRODUCTION

Musculoskeletal (MSK) injuries are very common and are associated with moderate to severe pain for most children. [1, 2] Despite three decades of research in this area, recent evidence confirms that pediatric pain management in the emergency department (ED) is still suboptimal. [3-5] Previous studies have demonstrated that only 35% of children presenting to a pediatric ED with fractures or severe sprains received *any* analgesic. [6, 7]

The American Academy of Pediatrics recommends acetaminophen, ibuprofen and opioids as the top three medication choices for the treatment of acute pain in children. [8] These are also the top three most commonly used analgesics for children with MSK injury. [3, 4, 6, 9, 10] However, there has recently been a concerted movement to limit opioid use in children, due, in large part, to the current Opioid Crisis.[11, 12] Clinicians are increasingly less likely to prescribe oral opioids to young children, and caregivers are increasingly less willing to administer them. [5] The fear of adverse events, particularly respiratory depression and deep sedation, are other important reasons to explain the reluctance to prescribe an opioid to children with moderate to severe pain. [13]

Clinicians are currently seeking optimal (and for many, non-opioid) oral analgesic options with the best efficacy and safety profile. It is known that the under-treatment of children's pain is partly due to a lack of evidence to support clinician decision-making in choosing the most effective medication. [4, 14] A recently published systematic review of MSK injury pain management concluded that an optimal analgesic approach could not be identified at this time. [15] Very few pediatric studies of analgesic combination therapy for MSK injury exist, and extrapolation from adult data can be misleading, both in establishing the correct dose and in assessing effect. [15-18] Research has demonstrated that a combination of oral morphine with ibuprofen was no more effective and was less safe than oral ibuprofen alone for children's MSK pain. [16] Two clinical trials of oral morphine versus ibuprofen have shown that oral morphine was not superior to ibuprofen alone. [19, 20] Similarly, oxycodone was no more effective and was less safe than ibuprofen for post-discharge fracture pain. [21] Further, tramadol, hydrocodone, and codeine are not recommended for widespread use in children due to safety concerns. [22-25] There is some emerging work from non-ED settings to suggest that oral hydromorphone may be an effective alternative to oral morphine and oxycodone. [26, 27] Oral hydromorphone is a long-acting opioid analgesic with a duration of action up to 4 hours and is more potent than oral morphine, but with fewer side effects. [28] Both oral hydromorphone and ibuprofen's peak analgesic action occurs at 60 minutes post administration.

The proposed study aims to determine if acetaminophen or hydromorphone, when added to ibuprofen, offers more clinical pain relief than ibuprofen alone, for children with an acute MSK injury. Further, it will determine if the combination of hydromorphone and ibuprofen is more clinically effective than the combination of acetaminophen with ibuprofen. This study, which will consist of two clinical trials, will inform health-care decisions by providing evidence for the effectiveness and safety of commonly prescribed

analgesic agents, and compare them to the most commonly used monotherapy, ibuprofen. [3, 6]

## METHODS AND ANALYSIS

This study will be conducted with a novel preference-informed complementary trial design and is comprised of two simultaneous ‘parallel’ trials. Eligible parent/caregiver-child pairs will decide which trial they wish to participate in: a three-armed opioid-inclusive trial (the Opioid trial) or a two-armed non-opioid trial (the Non-Opioid trial). Once the parent/caregiver and child have chosen their preferred trial, conduct within each trial will follow traditional randomized, double-blind, parallel assignment, placebo-controlled superiority trial methodology. Study endpoints will be identical for both trials within this study. The study protocol is reported using the SPIRIT-PRO reporting guidelines. [29] (See Table 1.)

Table 1. WHO Trial Registration Data Set

| Data Category                                 | Information                                                                                                                                                                                                                                                                                                                                                                     |
|-----------------------------------------------|---------------------------------------------------------------------------------------------------------------------------------------------------------------------------------------------------------------------------------------------------------------------------------------------------------------------------------------------------------------------------------|
| Primary Registry and Trial Identifying Number | clinicaltrials.gov NCT03767933                                                                                                                                                                                                                                                                                                                                                  |
| Date of Registration in Primary Registry      | December 7, 2018                                                                                                                                                                                                                                                                                                                                                                |
| Secondary Identifying Numbers                 | University of Alberta Research Ethics Board # Pro00073476                                                                                                                                                                                                                                                                                                                       |
| Source(s) of Monetary or Material Support     | Canadian Institutes of Health Research SPOR Innovative Clinical Trials Grant (MYG-151207)                                                                                                                                                                                                                                                                                       |
| Primary Sponsor                               | University of Alberta                                                                                                                                                                                                                                                                                                                                                           |
| Secondary Sponsor(s)                          | -                                                                                                                                                                                                                                                                                                                                                                               |
| Contact for Public Queries                    | Dr. Samina Ali 780.248.5575 sali@ualberta.ca                                                                                                                                                                                                                                                                                                                                    |
| Contact for Scientific Queries                | Dr. Samina Ali 780.248.5575 sali@ualberta.ca                                                                                                                                                                                                                                                                                                                                    |
| Public Title                                  | The No OUCH Study                                                                                                                                                                                                                                                                                                                                                               |
| Scientific Title                              | A Study of Non-Steroidal or Opioid Analgesia Use for Children with Musculoskeletal Injuries: The No OUCH Study                                                                                                                                                                                                                                                                  |
| Countries of Recruitment                      | Canada                                                                                                                                                                                                                                                                                                                                                                          |
| Health Condition(s) or Problem(s) Studied     | Acute musculoskeletal injury                                                                                                                                                                                                                                                                                                                                                    |
| Intervention(s)                               | <b>Opioid Trial:</b> A. Oral hydromorphone (0.05mg/kg, max 5mg) + Oral ibuprofen (10mg/kg, max 600mg)<br>B. Oral acetaminophen (15mg/kg, max 1000mg) + Oral ibuprofen (10mg/kg, max 600mg)<br><b>Non-Opioid Trial:</b> Oral acetaminophen (15mg/kg, max 1000mg) + Oral ibuprofen (10mg/kg, max 600mg)<br>(Comparator for <u>both</u> trials: Oral ibuprofen 10mg/kg, max 600mg) |

|                                      |                                                                                                                                                                                                                                                                                                                                                                                                                                                                                                                                                                                                                                                                                                                                                                                                                                                                                                                                                                                                                                                                                                                                                                                                                                                                                                                                                                                                                                                                                                                                                     |
|--------------------------------------|-----------------------------------------------------------------------------------------------------------------------------------------------------------------------------------------------------------------------------------------------------------------------------------------------------------------------------------------------------------------------------------------------------------------------------------------------------------------------------------------------------------------------------------------------------------------------------------------------------------------------------------------------------------------------------------------------------------------------------------------------------------------------------------------------------------------------------------------------------------------------------------------------------------------------------------------------------------------------------------------------------------------------------------------------------------------------------------------------------------------------------------------------------------------------------------------------------------------------------------------------------------------------------------------------------------------------------------------------------------------------------------------------------------------------------------------------------------------------------------------------------------------------------------------------------|
| Key Inclusion and Exclusion Criteria | <p>To be eligible to participate in this study, an individual must meet all of the following criteria:</p> <p>1. Child aged 6-17 years, 2. Presenting to the emergency department with an acute limb injury (&lt;24 hours old) that is neither obviously deformed nor having neuro-vascular compromise (as assessed by the triage nurse), 3. Self-reported pain score <math>\geq 5</math> on the 0 to 10 verbal Numerical Rating Scale at triage</p> <p>Exclusion criteria include: 1. Deemed to require immediate intravenous (IV) or intranasal (IN) pain medications by the clinical team, 2. Previously known hypersensitivity to study medications, 3. Acetaminophen or NSAID use within 3 hours prior to recruitment, 4. Opioid use within 1 hour prior to recruitment, 5. Caregiver and/or child cognitive impairment precluding the ability to self-report pain or respond to study questions, 6. Injury suspected to be due to non-accidental trauma/child abuse (as assessed by the triage nurse or reported by the family), 7. Suspected multi-limb fracture, 8. Chronic pain that necessitates daily analgesic use, 9. Hepatic or renal disease/dysfunction, 10. Bleeding disorder, 11. Known pregnancy, 12. Vomiting that precludes the ability to take oral medications (as determined by the family), 13. Caregiver and/or child inability to communicate fluently in English or French in the absence of a native language interpreter, 14. Caregiver unavailable for follow-up, or 15. Previous enrolment in the No OUCH study</p> |
| Study Type                           | Randomized, Double-Blind, Placebo-Controlled Superiority Trials                                                                                                                                                                                                                                                                                                                                                                                                                                                                                                                                                                                                                                                                                                                                                                                                                                                                                                                                                                                                                                                                                                                                                                                                                                                                                                                                                                                                                                                                                     |
| Date of First Enrollment             | April 20, 2019                                                                                                                                                                                                                                                                                                                                                                                                                                                                                                                                                                                                                                                                                                                                                                                                                                                                                                                                                                                                                                                                                                                                                                                                                                                                                                                                                                                                                                                                                                                                      |
| Sample Size                          | 536                                                                                                                                                                                                                                                                                                                                                                                                                                                                                                                                                                                                                                                                                                                                                                                                                                                                                                                                                                                                                                                                                                                                                                                                                                                                                                                                                                                                                                                                                                                                                 |
| Recruitment Status                   | Actively recruiting                                                                                                                                                                                                                                                                                                                                                                                                                                                                                                                                                                                                                                                                                                                                                                                                                                                                                                                                                                                                                                                                                                                                                                                                                                                                                                                                                                                                                                                                                                                                 |
| Primary Outcome(s)                   | The <b>Primary Efficacy Outcome</b> will be the self-reported pain score at 60 minutes, using an 11-point 0-10 verbal Numerical Rating Scale (vNRS).                                                                                                                                                                                                                                                                                                                                                                                                                                                                                                                                                                                                                                                                                                                                                                                                                                                                                                                                                                                                                                                                                                                                                                                                                                                                                                                                                                                                |
| Key Secondary Outcomes               | The <b>Principal Safety Endpoint</b> will be the proportion of children with adverse events related to study drug administration.                                                                                                                                                                                                                                                                                                                                                                                                                                                                                                                                                                                                                                                                                                                                                                                                                                                                                                                                                                                                                                                                                                                                                                                                                                                                                                                                                                                                                   |

|                       |                                                                                                             |
|-----------------------|-------------------------------------------------------------------------------------------------------------|
| Ethics Review         | University of Alberta Research Ethics Board #<br>Pro00073476                                                |
| Completion date       | -                                                                                                           |
| Summary Results       | -                                                                                                           |
| IPD sharing statement | De-identified data can be shared, on a case-by-case basis, upon discussion with the principal investigator. |

### Study Setting

This study will be conducted in six pediatric EDs across Canada: 1. Stollery Children's Hospital (Edmonton, Alberta) (coordinating site), 2. Alberta Children's Hospital (Calgary, Alberta), 3. Winnipeg Children's Hospital (Winnipeg, Manitoba), 4. Children's Hospital at London Health Sciences Centre (London, Ontario), 5. CHEO (Ottawa, Ontario), and 6. Centre Hospitalier Universitaire Ste-Justine (Montreal, Quebec). The annual ED census for recruiting centers ranges from 30,000 to 80,000 patient visits. Study recruitment began on April 20, 2019 and is expected to be completed within 18 months.

### Eligibility and Exclusion Criteria

Children will be eligible if they are 6 to 17 years, presenting to the ED with an acute limb injury (<24 hours old) that is neither obviously deformed nor having neuro-vascular compromise, and have a self-reported verbal Numerical Rating Scale pain score  $\geq 5$  at triage. This age group was chosen as fractures rarely occur under this age, and a consistent and validated pain measurement tool can be employed across this age range.

Children will be excluded if they meet any of the following criteria: (a) require immediate intravenous or intranasal pain medications (b) have known hypersensitivity to study medications, (c) receive acetaminophen or NSAID within three hours prior to recruitment, (d) receive opioids within one hour prior to recruitment, (e) parent/caregiver or child cognitive impairment precluding the ability to self-report pain or respond to study questions, (f) injury suspected to be due to non-accidental trauma or child abuse, (g) suspected multi-limb fracture, (h) chronic pain that necessitates daily analgesic use, (i) known hepatic or renal disease/dysfunction, (j) known bleeding disorder, (k) known pregnancy, (l) vomiting that precludes the ability to take oral medications, (m) parent/caregiver and/or child inability to communicate fluently in English or French in the absence of a native language interpreter, (n) parent/caregiver unavailable for follow-up, or (o) previous enrolment in this study.

### Study Interventions and Rescue Medications

If a family chooses the **Opioid** trial, their child will be randomized to one of three treatment arms: (a) oral ibuprofen + acetaminophen placebo + hydromorphone placebo, OR (b) oral ibuprofen + oral acetaminophen+ hydromorphone placebo, OR (c) oral ibuprofen + acetaminophen placebo + oral hydromorphone.

1  
2  
3 If a family chooses the **Non-Opioid** trial, their child will be randomized to one of two  
4 treatment arms: (a) oral ibuprofen + acetaminophen placebo, OR (b) oral ibuprofen + oral  
5 acetaminophen.  
6

7  
8 Ibuprofen will be dosed as 10mg/kg (maximum 600 mg), acetaminophen as 15mg/kg  
9 (maximum 1000 mg), and oral hydromorphone as 0.05mg/kg (maximum 5 mg).  
10

11 Given the consistent recommendations that ibuprofen be the first-line therapy for acute  
12 MSK injury pain, [15, 30-32] and the fact that it is the medication of choice for triage-  
13 initiated pain protocols at most Canadian pediatric EDs, [33] ibuprofen will serve as the  
14 comparator (standard of care) for both trials.  
15

16  
17 All study medications and placebos will be administered as a single oral dose in liquid  
18 form. No other medications will be administered as part of the study. However, enrolled  
19 patients will be eligible to receive additional analgesia at any time if requested and/or  
20 deemed necessary by the clinical team. The treating physician will order rescue analgesia  
21 at their discretion. Any such co-interventions, including non-pharmacologic interventions  
22 (e.g. ice, splinting) will be documented.  
23  
24

### 25 **Randomization, Allocation Concealment, and Blinding**

26 Randomization will be determined using a secure online centralized randomization tool  
27 hosted by the Women and Children's Health Research Institute (WCHRI, University of  
28 Alberta). [34] Participants will be allocated via a kit number. A statistician will oversee  
29 the generation of a randomized listing of the treatment by kit number using a 1:1:1  
30 allocation scheme for the Opioid trial, and a 1:1 allocation scheme for the Non-Opioid  
31 trial. This will be further stratified by center using block-randomization with variable  
32 block sizes. These randomization lists, which will be sent directly by the statistician to  
33 the participating site's research pharmacy team, will be used by each participating site's  
34 research pharmacy to create pre-packaged, sequential study kits for each trial. Research  
35 nurses will then allocate the kits to enrolled participants in sequential fashion.  
36  
37  
38

39 Study participants, research nurses (the outcome assessors), ED staff, and data analysts  
40 will all be blinded with respect to the intervention. In the rare occurrence where a treating  
41 physician feels that knowing what the child has received will impact further clinical care,  
42 the study blind can be broken by the clinical team for patient safety. The protocol for  
43 unblinding will involve the research nurse logging in to a secure web-based unblinding  
44 system with REDCap. However, only the treating physician will 'click' on the button to  
45 reveal the study medications administered. Thus, parents/caregivers, children and  
46 research staff will remain blinded.  
47  
48

### 49 **Recruitment and Data Collection**

50 The patient's initial assessment upon arrival to the ED will be performed by a triage  
51 nurse. Triage nurses, research nurses, or their designate will identify potentially eligible  
52 participants. Research nurses will be present in enrolling EDs up to 16 hours a day to  
53 screen children and assess eligibility based on the inclusion and exclusion criteria  
54 outlined above. Research nurses will follow site-specific Research Ethics Board (REB)  
55  
56  
57  
58  
59



1  
2  
3 guidelines regarding approaching families for research studies. Verbal consent for  
4 screening will be obtained from families and documented. For eligible parent/caregiver-  
5 child pairs who express interest in study participation, an ED physician will confirm  
6 eligibility, and the research nurse or designate will complete consent and assent, as  
7 appropriate (Appendix 1).  
8  
9

10 After obtaining written informed consent from the parent/caregiver, and assent from the  
11 child where appropriate, the research nurse will determine preference for study trial (ie.  
12 Opioid or Non-Opioid). In keeping with the ethical requirements of the involved  
13 Canadian institutions, we will have consent forms for parent/caregivers, assent forms for  
14 children, and mature minor consent forms for both accompanied and unaccompanied  
15 youth who are deemed to be mature minors. All of these forms are written in a manner to  
16 reflect the reading and comprehension capacity of the target groups. If the  
17 parent/caregiver and child pair do not voice a trial preference, they will be enrolled in the  
18 Opioid trial as it contains all three possible medication combinations offered in the study,  
19 as outlined in the consent form. The research nurse will administer the study medications  
20 according to the randomization scheme for that chosen trial (Figure 1). If a participant  
21 vomits within 30 minutes of drug administration, it will be repeated once in accordance  
22 with current clinical and research practice. [35] The parent/caregiver will be asked to  
23 complete a brief survey in the ED to explore their reasons for choosing their study trial  
24 (see Appendix 2).  
25  
26  
27

28 Following study drug administration, the research nurse will monitor the participant for  
29 up to 120 minutes, with safety and efficacy measures recorded at the time of recruitment  
30 (T-R), time of study drug administration (T-0), at 30 minutes, 60 minutes, 90 minutes and  
31 120 minutes post-study drug administration (T-30, T-60, T-90, T-120 respectively), at the  
32 time of medical examination (T-ME) and as soon as possible following x-ray (T-XR). All  
33 study measures at T-30, T-60, T-90, and T-120 will be collected within 15 minutes of the  
34 designated time point (i.e.  $\pm 15$  minutes). All study measures for T-ME and T-XR will be  
35 collected within 30 minutes of the designated time point. If a patient is discharged prior  
36 to T-120, the study measures will be recorded one last time at the time of discharge.  
37  
38  
39

40 Pain scores will be measured on the verbal Numerical Rating Scale (vNRS), Visual  
41 Analog Scale (VAS), and Faces Pain Scale-Revised (FPS-R) at each study time point.  
42 [36, 37] In addition, the research nurse will also evaluate the presence of adverse events  
43 (e.g. nausea, vomiting), record vital signs (pulse, blood pressure, respiratory rate, oxygen  
44 saturation) and evaluate sedation level using the Ramsay Sedation Scale (RSS). [38]  
45 Reporting of adverse events will be in keeping with Health Canada regulations and REB  
46 guidelines. Prior to their discharge from the ED, both the child and parent/caregiver will  
47 be asked to rate acceptability of the study medication received during the trial using a  
48 Likert scale. (Figure 2)  
49  
50

51 Two brief 10-minute follow-up surveys will be completed with the parent/caregiver  
52 following their child's discharge from the ED. Parents/caregivers will have the option of  
53 completing these over the phone or online via a secure email link. Non-responders to  
54 email contact and those who prefer phone follow-up will be called 3-5 times depending  
55  
56  
57  
58  
59

on local REB requirements. The first follow-up survey, conducted at 1-3 days post ED discharge, will determine the occurrence of any adverse events since discharge. The second follow-up survey will be completed at 1-2 weeks post ED discharge, to determine parent/caregiver comfort and satisfaction with at-home pain management and the extent of functional limitations for their child.

To achieve adequate participant enrolment to reach target sample size, we will monitor the monthly recruitment targets and have regular (every 4-8 week) team meetings to allow for timely implementation of procedural changes. There are no plans for patient follow-up beyond the two-week study period, given that only one dose of study medications will be administered. All study scripts and data collection tools will be available in English and French.

### Outcome Measures

The Primary Efficacy Outcome will be the self-reported vNRS pain score at 60 minutes post study drug administration. The vNRS, ranging from 0 (no pain) to 10 (worst pain imaginable), is the most commonly used, responsive pain measurement tool for the study age group. [39] It has been successfully employed in several children's pain studies, [40, 41] and is validated for the age range of children included in this study. [42] The 60-minute primary outcome time point reflects the peak plasma concentration and clinical action of both oral hydromorphone and ibuprofen. [28, 43-45]

The Principal Safety Endpoint will be the proportion of children with adverse events related to study drug administration. Medication safety profiles influence parent/caregiver and patient willingness to adhere to medication regimens. [46] It has also been previously established that more safety data is urgently needed to inform clinical decision-making when using the study medications of interest. [30]

The Secondary Outcomes will include efficacy, safety and preference endpoints:

#### Secondary Efficacy Outcomes

1. A vNRS pain score <3 at T-60
2. A vNRS pain score reduction of at least 2 points out of 10 at T-60
3. Pain scores at study time-points (T-30, T-60, T-90, T-120, T-ME and T-XR).
4. ED length of stay/Rescue analgesic in the 60 minutes following administration of study medication
5. Time to effective analgesia, defined as the first vNRS pain score <3 post-intervention
6. Children's self-reported pain intensity on the VAS and the FPS-R at all study time-points

#### Secondary Safety Outcomes

1. Any serious adverse events during the study period, including apnea, cardiac arrest, or death
2. A Ramsay Sedation Score between 1 to 3
3. Each specific adverse event type (e.g., nausea, dizziness, itchiness) during the study period

#### 4. Missed fractures or dislocations

#### Secondary Preference Outcomes

1. Parent/caregiver reasons for choosing the opioid or the non-opioid trial
2. Self-reported parent/caregiver and child satisfaction with pain relief and acceptability of study medications, using a previously employed 5-point Likert scale [47]
3. Physicians' in-ED preference of analgesics for the patient
4. Parent/caregiver comfort treating their child at home, as measured by a scale created by the study team [5]

#### Sample Size

The sample size for the three-armed opioid trial is 105 patients per arm, for a total of 315. The sample size for the two-armed non-opioid trial is 85 patients per arm, for a total of 170. Thus, the total for the No OUCH Study would be 485. To account for missing data for the primary outcome due to early withdrawal, the study will over-recruit by approximately 10%, for a target recruitment of approximately 540 patients. This sample size was determined based on a two-sided level of 0.05, a power of 0.95, a minimally clinically important difference (MCID) of 1.5 on the vNRS, an estimate of the standard deviation (SD) of the difference of 2.7, [48] and a Bonferroni correction to adjust for the three treatment comparisons. Based on previously conducted survey work, [49] an imbalance in recruitment pace between the opioid and non-opioid trials is expected. However, both trials will continue to recruit until the sample size is met for both. One trial will over-recruit to allow for completion of the other, without compromising the key preference-based study design. To ensure timely completion of the No-OUCH Study, we will monitor the recruitment rates and potentially update the randomization strategy if there is an extreme over-recruitment for one of the trials.

#### Statistical Methods

All analyses will adhere to the principle of intention-to-treat. There will be three treatment comparisons: (1) ibuprofen versus ibuprofen plus acetaminophen; (2) ibuprofen versus ibuprofen plus hydromorphone; (3) ibuprofen plus acetaminophen versus ibuprofen plus hydromorphone. Due to homogeneity in the trial end-points for the two complementary trials, we will consider a joint analysis across both the endpoints if the two patient populations are sufficiently similar. This will be determined using the following specified decision rules.

For each treatment comparison, the primary analysis will compare the mean vNRS reduction for pain scores at T-60. This comparison will be facilitated using a linear mixed model with the T-0 measure on the vNRS for pain as a covariate and a site-specific effect. We will consider whether the two trials can be analysed together used nested linear mixed models with and without a trial by treatment interaction term. If this interaction term is not significant then a single treatment effect will be estimated for each comparison. A two-sided level of 0.05 will be used to declare significance. A Bonferroni-Holm correction will be used to adjust for the three treatment comparisons. The proportion of children with a self-reported of vNRS of less than 3 at 60 minutes, the proportion who require a rescue analgesic by 60 minutes and the proportion who

1  
2  
3 experienced adverse events related to study drug administration will be analyzed using a  
4 Mantel Haenszel chi-squared test, stratified by site. All other outcomes will be  
5 summarised using appropriate descriptive statistics.  
6

7  
8 There will be no interim analyses of the efficacy endpoints, as it is very difficult to  
9 change practice based on the results from small samples, regardless of the p-value. The  
10 Data Safety Monitoring Board (DSMB) will be provided with a masked comparison  
11 between treatment groups with respect to the safety endpoints at the intervals of their  
12 choosing. The decision to stop the trial for safety reasons will be left to the discretion of  
13 the DSMB (See Appendix 3 for DSMB Charter). Interim analyses will also monitor the  
14 relative recruitment rate of the two trials. If insufficient participants are enrolled on either  
15 of the No OUCH trials, appropriate action will be taken to ensure sufficient power to  
16 conclude following the completion of the trials. Further information is available in the  
17 Statistical Analysis Plan, which will be published separately.  
18  
19

### 20 **Health Economic Methods**

21 The trial will also examine the relative cost-effectiveness of each of the medication  
22 options. The economic evaluation will take a healthcare perspective for the reference  
23 case, in line with CADTH guidance [50] and in secondary analyses will consider societal  
24 costs. Information will be collected on interventions during ED visit, in hospital  
25 medication costs, and follow up care from other health services, as well as on costs  
26 incurred by families in interacting with health services. Quality of life will be measured  
27 by asking parents/caregivers to report their child's quality of life using a 10-point  
28 numeric scale. The health economic analysis will estimate the expected cost per  
29 incremental change in quality of life and will use nonparametric bootstrapping methods  
30 to calculate uncertainty to assist in decision making about the value of providing different  
31 treatment strategies.  
32  
33  
34

### 35 **Patient and Public Involvement**

36 The team's patient engagement partner (SH) has provided ongoing input on the study  
37 protocol and data collection tools. The study team was also supported by parent advisory  
38 groups at the ECHO (Evidence in Child Health to Enhance Outcomes) Research Program  
39 (Edmonton, Alberta) and TREKK (Translating Emergency Knowledge for Kids)  
40 (Winnipeg, Manitoba). Parent advisors reviewed and provided feedback on the wording,  
41 readability, sensitivity, flow and content of parent/caregiver surveys. Following  
42 recruitment completion, parent advisors will be engaged in focus groups to discuss study  
43 results and dissemination plans in the context of family-centered care.  
44  
45  
46

### 47 **Data Management**

48 Data management services will be provided by the WCHRI data coordinating centre.  
49 Study data will be entered and managed using REDCap (Research Electronic Data  
50 Capture) tools hosted and supported by WCHRI.[51] WCHRI's REDCap installation is a  
51 validated electronic, web-based data capture system housed in a secure data center at the  
52 University of Alberta.  
53  
54  
55  
56  
57  
58  
59

1  
2  
3 Data will be entered directly into the study database or, in case of technical failure, it may  
4 be collected on paper and then digitally recorded in REDCap. Selected data elements will  
5 be validated electronically on an ongoing basis throughout the study and any  
6 discrepancies will be assigned to members of the study team for resolution. REDCap  
7 includes internal quality checks, such as automatic range checks, to identify data that  
8 appear inconsistent, incomplete, or inaccurate (see Appendix 4 for data management  
9 plan).

10  
11  
12 Only limited identifiable data will be stored in REDCap (e.g. email address) for the  
13 purposes of completing follow-up surveys. Study participants' contact information will  
14 be stored securely at each clinical site for internal use during the study. Paper records  
15 (e.g., signed consent and assent forms) will be stored in a secure locked cabinet at each  
16 site, with limited access by the research team only. At the end of the study, all records  
17 will continue to be kept in a secure location for as long a period as dictated by the  
18 reviewing REB, institutional policies, or sponsor requirements.

### 21 **Monitoring**

22 Monitoring for quality and regulatory compliance will be performed by the University of  
23 Alberta's Quality Management in Clinical Research (QMCR) office. QMCR is an  
24 independent unit housed within the university's central administration that provides arms-  
25 length review of all University of Alberta sponsored trials, at least three times per year.  
26 Details of clinical site monitoring will be documented in a Clinical Monitoring Plan.

27  
28  
29 Safety oversight will be under the direction of a DSMB which will function  
30 independently of the investigators. This committee will be chaired by Dr. Garth Meckler  
31 and is composed of 5 individuals with expertise in trial methodology, epidemiology,  
32 biostatistics, and pediatric emergency medicine. The DSMB will meet at least semi-  
33 annually to assess safety and efficacy data and will operate under the rules of an  
34 approved charter/ terms of reference.

### 37 **ETHICS AND DISSEMINATION**

38  
39 Based on previously conducted research with oral opioids, [16, 20, 30] nausea, mild  
40 dizziness, and drowsiness are expected to be possible non-serious adverse events in this  
41 study. There is a small potential risk of respiratory depression following the  
42 administration of any opioid, although the risk is notably greater with repeat dosing and  
43 intravenous administration. This risk will be minimized by using only a single oral dose  
44 and vigilantly monitoring the participant's vital signs and level of sedation during the  
45 study period, which extends for one hour past the peak action point of the drugs.

46  
47  
48 This study will be federally monitored by Health Canada, and approval has been granted  
49 for the conduct of this study (HC6-24-c220455). The Research Ethics Board at the  
50 University of Alberta has further approved this study (Pro00073476). The five other  
51 participating centers acquired ethics approval from their local REBs prior to commencing  
52 recruitment. Any protocol amendments will be submitted for Health Canada review and  
53 REB approvals prior to implementation and will be added as an amendment to the  
54

clinicaltrials.gov registration. Institutional approvals from each participating pediatric ED will be obtained prior to beginning recruitment.

Public opinion regarding opioids is notably negative at this time, thus there is a hesitancy to accept opioids, even when they are felt to be clinically indicated. As such, it is expected that some parents/caregivers will be hesitant to accept opioids. [52-54] However, the study will leverage this opportunity to *understand* parent/caregiver perspectives and rationale for their decision-making. This valuable information can then inform knowledge translation of study results, educational initiatives and responsive healthcare provider prescribing of analgesia.

The study team plans to publish this trial in a high-impact, peer-reviewed journal and present the results at national and international meetings; authorship eligibility will be determined by employing the International Committee of Medical Journal Editors' recommended guidelines. [55] Statistical code and dataset can be made available upon request.

**Competing Interests** None declared.

**Patient Consent** After assessing child eligibility based on the outlined inclusion/exclusion criteria, research nurses will obtain parent/caregiver consent (and assent for children 7 years and older) prior to recruitment of each patient. The research nurse will provide the parent/caregiver and child with both a verbal and written explanation of the study and an opportunity to review the information and consent/assent forms privately. They will then return shortly afterwards to answer any questions parent/caregiver or child might have and obtain written consent and assent.

**Acknowledgments** The authors would like to acknowledge the iPCT SPOR team and our parent advisors, who provided valuable input on the study design and documents. The authors are also grateful to Dr. Dennis Cote (College of Pharmacy, Rady Faculty of Health Sciences, University of Manitoba) for leading the development of the study placebos.

The following are the members of the KidsCAN PERC Innovative Pediatric Clinical Trials No OUCH Study Team: Dr. Amy Drendel, Dr. Gareth Hopkin, Dr. Jeff Round, Dr. Martin Offringa, Dr. Petros Pechlivanoglou, Dr. Eleanor Pullenayegum, David Rios, Marie-Christine Auclair, Kelly Kim, Lise Bourrier, Lauren Dawson, Kamary Coriolano DaSilva, Pamela Marples, Rick Watts, Dr. Jennifer Thull-Freedman, Dr. Patrick McGrath, Dr. Timothy A.D. Graham, Dr. Lisa Hartling, Tannis Erickson, Brendon Foot, Kurt Schreiner and Julie Leung.

## References

1. Spady DW, Saunders DL, Schopflocher DP, et al. Patterns of injury in children: a population-based approach, *Pediatrics* 2004;113:522-9.
2. Canadian Institute for Health Information, (CIHI). National Trauma Registry Report: Major Injury in Canada. *Canadian Institute for Health Information (CIHI)* 2007. Available at: <https://www.cihi.ca/en/national-trauma-registry-report-major-injury-in-canada-2010-2011> (accessed 21 Dec 2018).
3. Kircher J, Drendel AL, Newton AS, et al. Acute pediatric musculoskeletal pain management in North America: a practice variation survey, *Clin Pediatr (Phila)* 2014;53:1326-35 doi:10.1177/0009922814555972.
4. Ali S, Chambers A, Johnson DW, et al. Reported practice variation in pediatric pain management: a survey of Canadian pediatric emergency physicians, *CJEM* 2014;16:352-60.
5. Whitson C, Ali S, Wright B, et al. Caregiver acceptance of analgesia for children in the emergency department: a multicentered study. *CJEM* 2017.
6. Kircher J, Drendel AL, Newton AS, et al. Pediatric musculoskeletal pain in the emergency department: a medical record review of practice variation, *CJEM* 2014;16:449-57.
7. LeMay S, Johnston C, Choinière M, et al. Pain management interventions with parents in the emergency department: a randomized trial, *J Adv Nurs* 2010;66:2442-9 doi:10.1111/j.1365-2648.2010.05408.x.
8. American Academy of Pediatrics. Committee on Psychosocial Aspects of Child and Family Health, Task Force on Pain in Infants, Children, and Adolescents. The assessment and management of acute pain in infants, children, and adolescents, *Pediatrics* 2001;108:793-7.
9. Drendel AL, Lyon R, Bergholte J, et al. Outpatient pediatric pain management practices for fractures, *Pediatr Emerg Care* 2006;22:94-9 doi:10.1097/01.pec.0000199564.64264.f4.
10. Friday JH, Kanegaye JT, McCaslin I, et al. Ibuprofen provides analgesia equivalent to acetaminophen-codeine in the treatment of acute pain in children with extremity injuries: a randomized clinical trial, *Acad Emerg Med* 2009;16:711-6 doi:10.1111/j.1553-2712.2009.00471.x.
11. National Institute on Drug Abuse. Opioid Overdose Crisis. 2019. Available at: <https://www.drugabuse.gov/drugs-abuse/opioids/opioid-overdose-crisis> (accessed 03 Oct 2019).
12. Centers for Disease Control and Prevention. Understanding the Epidemic. 2018. Available at: <https://www.cdc.gov/drugoverdose/epidemic/index.html> (accessed 03 Oct 2019).
13. Alexander J, Manno M. Underuse of analgesia in very young pediatric patients with isolated painful injuries, *Ann Emerg Med* 2003;41:617-22 doi:10.1067/mem.2003.138.
14. Ali S, Chambers AL, Johnson DW, et al. Paediatric pain management practice and policies across Alberta emergency departments, *Paediatrics & child health* 2014;19:190-4.

15. Le May S, Ali S, Khadra C, et al. Pain Management of Pediatric Musculoskeletal Injury in the Emergency Department: A Systematic Review, *Pain Res Manag* 2016;2016:4809394 doi:10.1155/2016/4809394.
16. Le May S, Ali S, Plint A, et al. Oral Analgesics Utilization for Children With Musculoskeletal Injury (OUCH Trial): An RCT. *Pediatrics* 2017;140.
17. Drendel AL, Gorelick MH, Weisman SJ, et al. A randomized clinical trial of ibuprofen versus acetaminophen with codeine for acute pediatric arm fracture pain, *Ann Emerg Med* 2009;54:553-60 doi:10.1016/j.annemergmed.2009.06.005.
18. Clark E, Plint AC, Correll R, et al. A randomized, controlled trial of acetaminophen, ibuprofen, and codeine for acute pain relief in children with musculoskeletal trauma, *Pediatrics* 2007;119:460-7 doi:10.1542/peds.2006-1347.
19. Poonai N, Dato N, Ali S, et al. Oral morphine versus ibuprofen administered at home for postoperative orthopedic pain in children: a randomized controlled trial, *CMAJ* 2017;189:E1252-8 doi:10.1503/cmaj.170017.
20. Poonai N, Bhullar G, Lin K, et al. Oral administration of morphine versus ibuprofen to manage postfracture pain in children: a randomized trial, *CMAJ* 2014;186:1358-63 doi:10.1503/cmaj.140907.
21. Ali S, Drendel AL, Rosychuk RJ, et al. Ibuprofen or oxycodone? An observational cohort study of post-emergency department discharge management of children's fracture pain [abstract]. *Canadian Association of Emergency Physicians (CAEP 2016)* 2016.
22. McGinley L. FDA warns against giving kids cough and cold medicines with codeine or hydrocodone. *The Washington Post*. Jan 11 2018. Available at: <https://www.washingtonpost.com/news/to-your-health/wp/2018/01/11/fda-warns-against-giving-kids-cough-and-cold-medicines-with-codeine-or-hydrocodone/> (accessed 25 Feb 2020).
23. McGinley L. FDA warns of dangers of codeine and tramadol for children and breast-feeding mothers. *The Washington Post*. Apr 20 2017. Available at: <https://www.washingtonpost.com/news/to-your-health/wp/2017/04/20/fda-warns-of-dangers-of-codeine-and-tramadol-for-children-and-breast-feeding-mothers/> (accessed 25 February 2020).
24. Tobias JD, Green TP, Côté CJ. Codeine: Time to Say "No", *Pediatrics* 2016;138 doi:10.1542/peds.2016-2396.
25. Health Canada. Health Canada's review recommends codeine only be used in patients aged 12 and over. Jun 06 2013. Available at: <https://healthycanadians.gc.ca/recall-alert-rappel-avis/hc-sc/2013/33915a-eng.php> (accessed 25 February 2020).
26. Sharar SR, Bratton SL, Carrougher GJ, et al. A comparison of oral transmucosal fentanyl citrate and oral hydromorphone for inpatient pediatric burn wound care analgesia, *J Burn Care Rehabil* 1998;19:516-21.
27. Givens M, Rutherford C, Joshi G, et al. Impact of an emergency department pain management protocol on the pattern of visits by patients with sickle cell disease, *J Emerg Med* 2007;32:239-43 doi:10.1016/j.jemermed.2006.07.022.
28. Bissonnette B. Pediatric Anesthesia. Shelton, CT: People's Medical Publishing House 2014:2286.



29. Chan A, Tetzlaff JM, Altman DG, et al. SPIRIT 2013 statement: defining standard protocol items for clinical trials, *Ann Intern Med* 2013;158:200-7 doi:10.7326/0003-4819-158-3-201302050-00583.
30. Hartling L, Ali S, Dryden DM, et al. How Safe Are Common Analgesics for the Treatment of Acute Pain for Children? A Systematic Review, *Pain Res Manag* 2016;2016:5346819 doi:10.1155/2016/5346819.
31. Ali S, Drendel AL, Kircher J, et al. Pain management of musculoskeletal injuries in children: current state and future directions, *Pediatr Emerg Care* 2010;26:518-28 doi:10.1097/PEC.0b013e3181e5c02b.
32. Morris L, Stulberg D, Stevermer JJ. Fracture pain relief for kids? Ibuprofen does it better, *J Fam Pract* 2010;59:273-5.
33. Trottier ED, Ali S, Le May S, et al. Treating and Reducing Anxiety and Pain in the Paediatric Emergency Department: The TRAPPED survey, *Paediatr Child Health* 2015;20:239-44.
34. Women and Children's Health Research Institute, (WCHRI). Data Coordinating Centre. Available at: <https://www.wchri.org/data-coordinating-centre> (accessed 21 Dec 2018).
35. Bjornson CL, Klassen TP, Williamson J, et al. A randomized trial of a single dose of oral dexamethasone for mild croup, *N Engl J Med* 2004;351:1306-13 doi:10.1056/NEJMoa033534.
36. LeMay S, Ballard A, Khadra C, et al. Comparison of the psychometric properties of 3 pain scales used in the pediatric emergency department: Visual Analogue Scale, Faces Pain Scale-Revised, and Colour Analogue Scale, *Pain* 2018;159:1508-17 doi:10.1097/j.pain.0000000000001236.
37. Tsz DS, von Baeyer CL, Pahalyants V, et al. Validity and Reliability of the Verbal Numerical Rating Scale for Children Aged 4 to 17 Years With Acute Pain, *Annals of Emergency Medicine* 2018;71:691,702.e3 doi:10.1016/j.annemergmed.2017.09.009.
38. Ramsay MA, Savege TM, Simpson BR, et al. Controlled sedation with alphaxalone-alphadolone, *British medical journal* 1974;2:656-9.
39. von Baeyer CL. Children's self-report of pain intensity: what we know, where we are headed, *Pain research & management* 2009;14:39.
40. Miró J, Castarlenas E, de la Vega R, et al. Validity of three rating scales for measuring pain intensity in youths with physical disabilities, *Eur J Pain* 2016;20:130-7 doi:10.1002/ejp.704.
41. Castarlenas E, Jensen MP, von Baeyer CL, et al. Psychometric Properties of the Numerical Rating Scale to Assess Self-Reported Pain Intensity in Children and Adolescents: A Systematic Review, *Clin J Pain* 2017;33:376-83 doi:10.1097/AJP.0000000000000406.
42. Castarlenas E, Miró J, Sánchez-Rodríguez E. Is the verbal numerical rating scale a valid tool for assessing pain intensity in children below 8 years of age? *J Pain* 2013;14:297-304 doi:10.1016/j.jpain.2012.12.004.
43. Vallner JJ, Stewart JT, Kotzan JA, et al. Pharmacokinetics and bioavailability of hydromorphone following intravenous and oral administration to human subjects, *J Clin Pharmacol* 1981;21:152-6.
44. Konstan MW, Hoppel CL, Chai BL, et al. Ibuprofen in children with cystic fibrosis: pharmacokinetics and adverse effects, *J Pediatr* 1991;118:956-64.

- 1  
2  
3  
4  
5  
6  
7  
8  
9  
10  
11  
12  
13  
14  
15  
16  
17  
18  
19  
20  
21  
22  
23  
24  
25  
26  
27  
28  
29  
30  
31  
32  
33  
34  
35  
36  
37  
38  
39  
40  
41  
42  
43  
44  
45  
46  
47  
48  
49  
50  
51  
52  
53  
54  
55  
56  
57  
58  
59  
60
45. Physician's Desk Reference. Montvale, NJ: Medical Economics Company, Inc. 2002:2002-5.
  46. Ali S, Poonai N. Parents' preferences on pain treatment, even when faced with medication dilemmas, influence their decisions to administer opioids in children, *Evid Based Nurs* 2016;19:51-2 doi:10.1136/eb-2015-102164.
  47. Weingarten L, Kircher J, Drendel AL, et al. A survey of children's perspectives on pain management in the emergency department, *J Emerg Med* 2014;47:268-76 doi:10.1016/j.jemermed.2014.01.038.
  48. Tsze DS, Hirschfeld L, Suarez L, et al. Clinical Interpretation of Changes in Self-Report Pain Scores in Children with Acute Pain. &nbsp; *Pediatric Academic Societies Annual Conference* May 6, 2017.
  49. Jun E, Ali S, Yaskina M, et al. A two-centre survey of caregiver perspectives on opioid use for children's acute pain management, *Paediatr Child Health* 2019; pxz162, <https://doi.org/10.1093/pch/pxz162>. Available at: <https://academic.oup.com/pch/advance-article-abstract/doi/10.1093/pch/pxz162/5690547?redirectedFrom=fulltext> (Accessed 13 March 2020)
  50. Guidelines for the economic evaluation of health technologies: Canada. 4th ed. Ottawa: CADTH; 2017 Mar.
  51. Harris PA, Taylor R, Thielke R, et al. Research electronic data capture (REDCap)—A metadata-driven methodology and workflow process for providing translational research informatics support, *Journal of Biomedical Informatics* 2009;42:377-81 doi:10.1016/j.jbi.2008.08.010.
  52. Adhopia V. 'Our new normal': Hard-hit Ohio community fears opioid overdoses will be perpetual crisis. *CBC News*. Jun 20 2017. Available at: <https://www.cbc.ca/news/health/ohio-overdoses-perpetual-crisis-1.4164136> (Accessed 25 Feb 2020).
  53. Bearman D. When Pain Becomes Criminal: All About Opiate Phobia. *Huffington Post*. Mar 08 2017. Available at: [https://www.huffpost.com/entry/when-pain-becomes-criminal-all-about-opiate-phobia\\_b\\_58c098b7e4b0c3276fb78137](https://www.huffpost.com/entry/when-pain-becomes-criminal-all-about-opiate-phobia_b_58c098b7e4b0c3276fb78137) (Accessed 25 Feb 2020).
  54. Ubelacker S. The inside history of Canada's opioid crisis: Canada is in the midst of an epidemic of opioid use and abuse. How did we get here? *Maclean's*. Apr 25 2017. Available at: <https://www.macleans.ca/society/inside-the-history-of-canadas-opioid-crisis/> (accessed 25 Feb 2020).
  55. International Committee of Medical Journal Editors. 2017. Available at: <http://www.icmje.org/recommendations/browse/roles-and-responsibilities/defining-the-role-of-authors-and-contributors.html> (accessed 21 Dec 2018).

## AUTHORS' CONTRIBUTIONS

Dr. Samina Ali (SA) developed and revised the protocol, co-drafted the protocol paper, and will operationalize the study. She chose the previously validated tools for measuring the primary and secondary efficacy outcomes (vNRS, VAS and FPS-R).

Manasi Rajagopal (MR) is the national study coordinator who contributed to study design, co-drafted the protocol paper and will operationalize the study.

Dr. Lawrence Richer (LR) and Dr. Christopher McCabe (CM) co-developed the novel study methodology and contributed to protocol revision

Dr. Andrew R. Willan (AW), Dr. Maryna Yaskina (MY), and Dr. Anna Heath (AH) led the statistical analysis planning and contributed to protocol revision.

Dr. Amy L. Drendel (ALD) is a fracture outcomes expert who contributed to determining the secondary outcomes for the study; she contributed to methodology and revised the protocol.

Dr. Serge Gouin (SG), Dr. Antonia Stang (AS), Dr. Scott Sawyer (DB), and Dr. Maala Bhatt (MB), as site leads for this study, reviewed and revised the protocol, with special input into the Methods section of the study.

Serena Hickes (SH) is a family representative who reviewed and provided input into the study protocol. She provided lived experience in patient-oriented outcomes.

Dr. Naveen Poonai (NP), Dr. Martin Offringa (MA), and Dr. Terry Klassen (TK) co-developed the methodology and revised the protocol.

All authors have approved this final version of the protocol. None of the authors have financial or other conflicts of interests as they pertain to this study and its involved recruitment sites.

## FUNDING STATEMENT

This work is supported by an Innovative Clinical Trials Multi-year Grant from the Canadian Institutes of Health Research (funding reference number MYG-151207; 2017 – 2020), as part of the Strategy for Patient-Oriented Research and the Children’s Hospital Research Institute of Manitoba(Winnipeg, Manitoba), the Centre Hospitalier Universitaire Sainte-Justine (Montreal, Quebec), the Department of Pediatrics, University of Western Ontario (London, Ontario), the Alberta Children’s Hospital Research Institute (Calgary, Alberta), the Women and Children’s Health Research Institute (Edmonton, Alberta), the Children’s Hospital of Eastern Ontario Research Institute Inc. (Ottawa, Ontario), and the Hospital for Sick Children Research Institute (Toronto, Ontario). This study is sponsored by The Governors of the University of Alberta (Suite 400, 8215 – 112 Street, Edmonton, Alberta, Canada T6G 2C8). Neither the study sponsor nor funders have any role in the collection, management, analysis, or interpretation of data; writing of the report; or the decision to submit the report for publication.

peer review only

**Figures Legend**

Figure 1. Study Interventions

Figure 2. Schedule of Study Measures

**Table Legend**

Table 1. WHO Trial Registration Data Set

For peer review only

**Figure 1. Study Interventions**

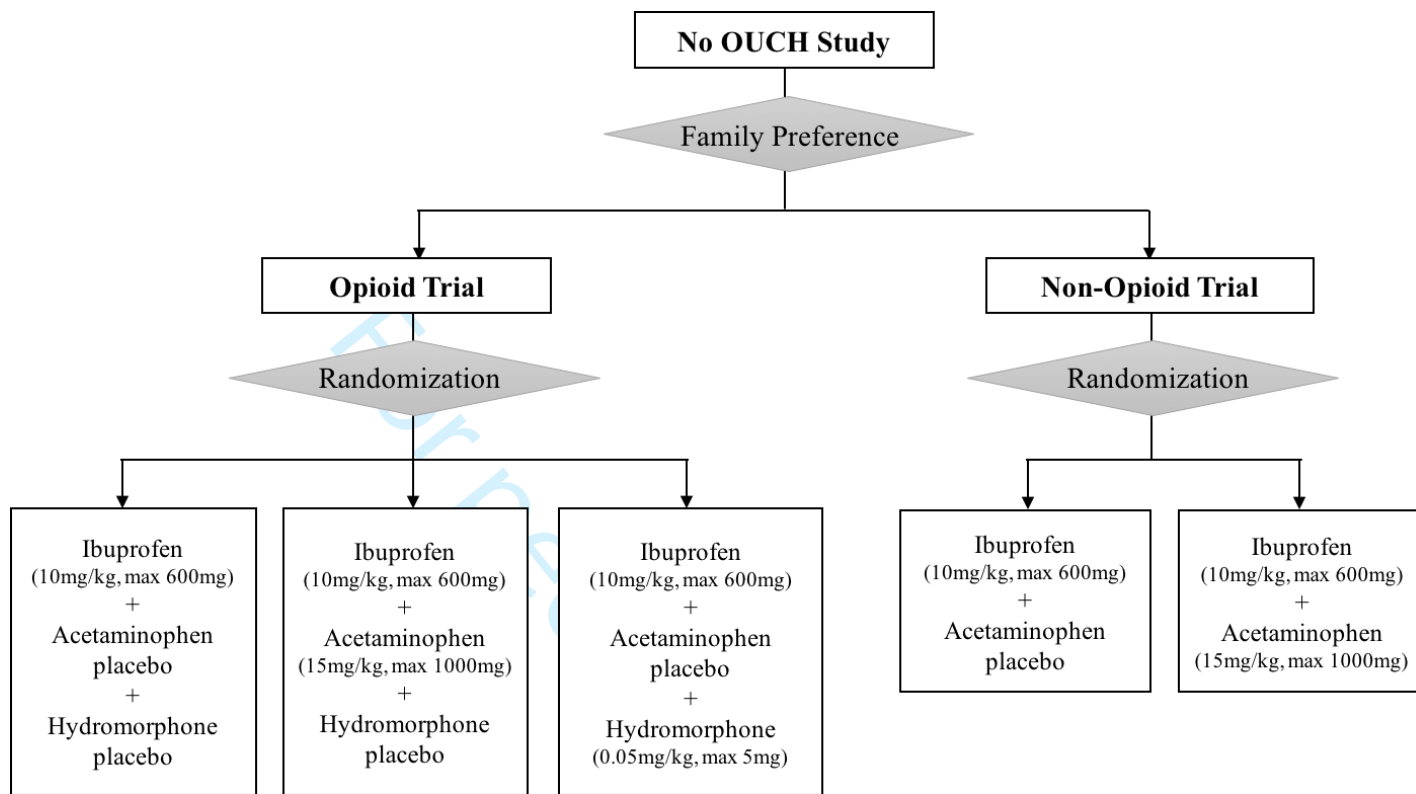

**Figure 2. Schedule of Study Measures**

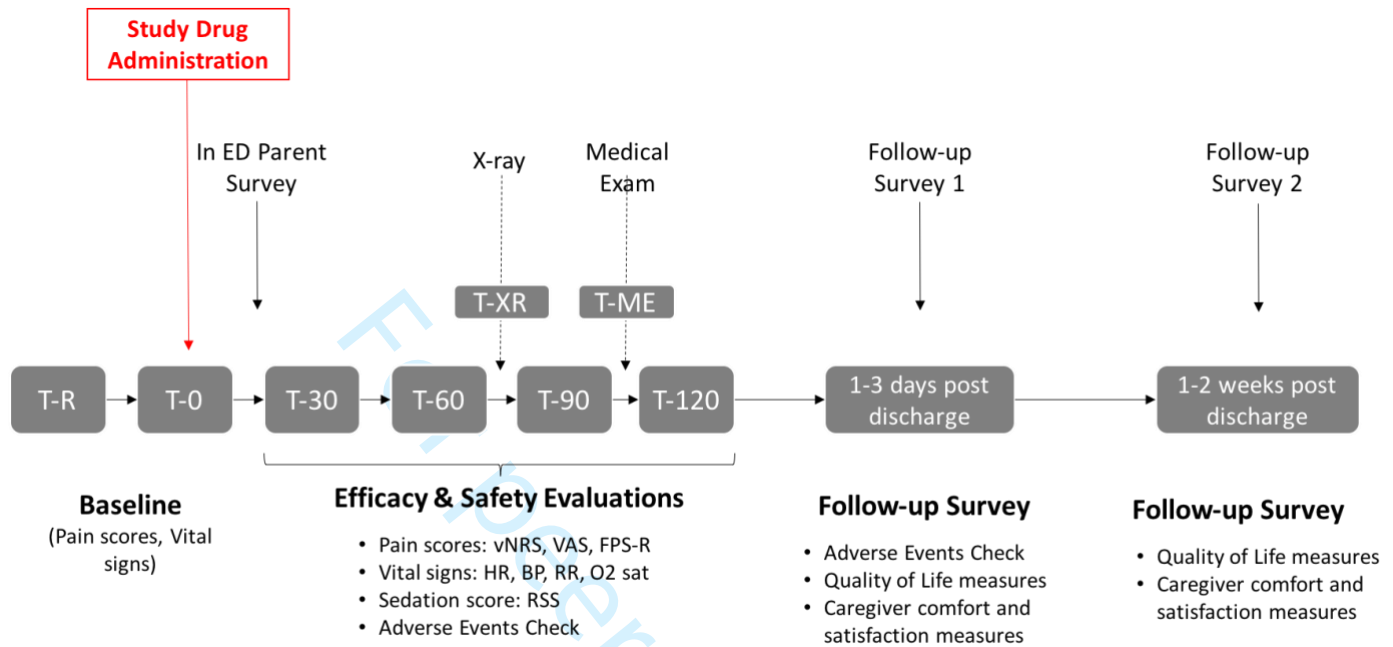

vNRS=verbal Numerical Rating Scale; VAS=Visual Analog Scale; FPS-R=Faces Pain Scale-Revised; RSS=Ramsay Sedation Scale

---

**PARENT/GUARDIAN CONSENT FORM**

**Title of Study:** A Study of Non-Steroidal or Opioid Analgesia Use for Children with Musculoskeletal Injuries

**Principal Investigator:** Dr. Samina Ali

(780) 248-5574

**Research Coordinator:** Ms. Manasi Rajagopal

(780) 248-5440

---

**Why am I being asked to consider this research study?**

You are being asked if you and your child would like to be part of a research study. In this study, we are trying to determine the best ways to treat children's pain due to a limb injury. You are being asked to take part as your child may have pain due to an injury and is between 6 and 17 years old.

Before you make your decision one of the research team members will review this form with you. A copy of this sheet will be given to you to keep. If you would like more information, please feel free to ask. You are encouraged to ask questions if you feel anything needs to be made clearer. Please take the time to read this document carefully.

If your child is old enough to understand this information we would also like you to talk to them about being part of the study. If your child is 7 years of age or older, we would like you both to sign a form if you would like to participate in the study.

**What is the reason for doing the study?**

The purpose of this research study is to figure out which of three pain medicines best treats a child's pain. The pain medicines we are studying are ibuprofen (Advil/Motrin), acetaminophen (Tylenol/Temptra), and hydromorphone (Dilaudid). Ibuprofen and acetaminophen are the top two medicines used in the world and are approved for children's pain in Canada. Hydromorphone is used and approved for treating many kinds of children's pain in Canada, and we have received Health Canada approval to study it for the pain of limb injuries, since Canada has not yet approved it specifically for this problem. This study will help us figure out which pain medicine or combination of pain medicines works best for children with limb injuries. We would also like to understand the thoughts and feelings you have when making decisions about pain medication for your child.

This study is being conducted in six children's hospitals across Canada, and we will ask a total of over 500 children to be part of this study. Approximately 100 of these children will be recruited from the Stollery Emergency Department.

**What will happen in the study?**

If you agree to take part in this study, we will ask you to select which one of our two study groups you would like to be enrolled in: Group 1 OR Group 2. Regardless of which study you choose, your child will, at minimum, receive ibuprofen (Advil/Motrin) for their pain.



If you select **Group 1**, your child will have an equal chance of receiving one of the two medicine options below. This will be decided by the computer at random, so there is an equal chance of receiving either option, like the toss of a coin.

1. Oral liquid Ibuprofen (Advil/Motrin) only OR
2. Oral liquid Ibuprofen (Advil/Motrin) and oral liquid acetaminophen (Tylenol/Tempra)

If you select **Group 2**, your child will have an equal chance of receiving one of the following three medicine options:

1. Oral liquid Ibuprofen only (Advil/Motrin) OR
2. Oral liquid Ibuprofen (Advil/Motrin) and oral liquid acetaminophen (Tylenol/Tempra) OR
3. Oral liquid Ibuprofen (Advil/Motrin) and oral liquid hydromorphone (Dilaudid)

If you don't have a preference for a study group, we will assign you to Group 2, as this group includes all three of the options you might be offered when participating in this research study.



All children in the study will receive ibuprofen (Advil/Motrin), which is the standard medicine given to children for injury-related pain. Some children will also receive either acetaminophen (Tylenol/Tempra) or hydromorphone (Dilaudid). Neither the study nurse nor your doctor will know which combination of medicines your child has received for the study, but if we need to know this for medical reasons we can find out. After the study medicines have been given, your child may also get further medicines, which are not part of the study, as routinely recommended by the emergency doctor who is taking care of your child.

During the study your child will be monitored closely by the study nurse. The study nurse will measure your child's heart rate, breathing rate, blood pressure, oxygen levels, and pain levels every 30 minutes for up to 2 hours. They will also measure your child's pain when the doctor examines him/her and immediately following any X-ray procedures. If your child's medical care is finished before the 2-hour study period, and you are ready to leave, this is not a problem. Our research nurse will collect the measurements from your child one last time, and then you can go home, at your will. Participating in this study should NOT delay your leaving the emergency department or affect the timing of when the doctor will see you.

We will ask you to complete a short 5-minute questionnaire on an iPad, while you are in the emergency department today. This questionnaire will ask about your demographics, your child's injury and about your reasons for choosing your study group (ie. Group 1 vs. Group 2). We will also complete two 5-10 minute follow up surveys to see how your child is doing. You will have the option of completing these by email (we will send you a link through a secure online portal called REDCap) or over the phone. The survey will be done 24 hours after you leave the emergency department, and again 1 week after. After the two surveys are done, your part of this study is done.

#### **What are the risks and discomforts?**

Your child may experience side effects from participating in this study. Some side effects are known and listed below, but there may be risks in this study that are currently not known. If we find out anything new during the course of this study that may change your willingness to be in the study, we will tell you about these findings.

Based on our team's previous work, we expect nausea, mild dizziness, and tiredness to be possible non-serious common side effects. It is possible that your child might experience this. There is a very rare risk of serious drowsiness and low breathing rate following the use of any opioid medicine; this is extremely rare when the medicine is taken by mouth, like it is in this study. Even though such events are very rare, we want to make sure that your child is safe at all times. So, our research nurse will be watching your child closely for these effects and will even use an oxygen monitor to closely observe them. If such an event were to occur, the emergency team of doctors and nurses would take care of your child, as they are already present in the department.

Finally, there is an extremely rare risk of an allergic reaction to one of the study medicines.

#### **What are the benefits to my child?**

Your child may not benefit directly from being in the study, but you will be helping us understand how to best treat pain in children who come to the emergency department.

#### **What happens if my child is injured because of this research?**

If your child becomes ill or injured as a result of being in this study, he/she will receive necessary medical treatment, at no additional cost to you. By signing this consent form you are not releasing the investigator(s), institution(s) and/or sponsor(s) from their legal and professional responsibilities. Contact the principal investigator, Dr. Samina Ali, at 780-248-5574, if your child has suffered an injury. If required, go to the emergency department right away.

### **Do I have to take part in the study?**

Being in this study is your and your child's choice. If you decide to be in the study, you can change your mind and stop being in the study at any time by letting the research nurse know. This will in no way affect the care or treatment that your child is entitled to.

### **Can our participation in the study end early?**

In addition to you being able to stop the study at any time, the study doctor may withdraw your child from this study for reasons such as:

- Your child is unable to tolerate the study medication
- The study doctor no longer feels this is the best option for your child

If your child is removed from this study, the research team will discuss the reasons with you and plans will be made for your child's continued care outside of the study.

### **Are there other choices to being in this research study?**

If you choose not to take part in this study today, your child's doctors and nurses will decide what medicines to treat your child's pain with.

### **What will it cost me to participate?**

There will be no costs to you to be in this study.

### **Will my information be kept private?**

During the study, we will be collecting health data about your child. We will do everything we can to make sure that this data is kept private. No data relating to this study that includes your child's name will be released outside of the study doctor's office or published by the researchers. Sometimes, by law, we may have to release your information with your name in it so we cannot guarantee absolute privacy. However, we will make every legal effort to make sure that your health information is kept private.

The study doctor/study staff will look at your child's personal health records held at the hospital, and/or kept by other health care providers that your child may have seen in the past (i.e. your family doctor). Any personal health information that we get from these records will be only what is needed for the study.

During research studies, it is important that the data we get is accurate. For this reason, your child's health data, including their name, may be looked at by people from: the research team, the study sponsor (University of Alberta), the University of Alberta auditors, clinical trial monitors, and Research Ethics Board, and Health Canada. By signing this consent form you are giving permission for the study doctor/staff to collect, use and disclose information about your child from his/her personal health records, as described above.

After the study is done, we will still need to securely store your health data that was collected as part of the study. In Canada, the law says we have to keep the data stored for 25 years after the end of the study. The data we collect will be stored, in Canada, on a system called REDCap. It will be accessible to and managed by, staff at the Women & Children's Health Research Institute

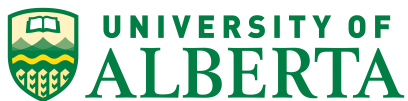

at the University of Alberta. If you leave the study, we will not collect new health information about you, but we will need to keep the data that we have already collected.

After study completion, your study data may be used again by other researchers. Any of your personal information (i.e. your name, address, telephone number) that can identify you will be removed or changed before files are shared with other researchers. Researchers that wish to use study data must 1) have their new study approved by an ethics board; 2) sign an agreement ensuring your confidentiality and restricting data use to only the approved study.

### **What if I have questions?**

If you have any questions about the research now or later, please contact the principal investigator Dr. Samina Ali at 780 248 5574, or the research coordinator Ms. Manasi Rajagopal at 780 248 5440.

If you have any questions regarding your rights as a research participant, you may contact the Health Research Ethics Board at 780-492-2615. This office is independent of the study investigators.

A copy of this sheet will be given to you to keep. This study is funded by the Canadian Institutes of Health Research and the Women and Children's Health Research Institute. The Institution and study doctor are getting money from the study sponsor to cover the costs of doing this study. You are entitled to request any details concerning this compensation from the Principal Investigator.

review only



**CONSENT**

**Title of Study:** A Study of Non-Steroidal or Opioid Analgesia Use for Children with Musculoskeletal Injuries

**Principal Investigator(s):** Dr. Samina Ali  
**Research Coordinator:** Ms. Manasi Rajagopal

**Phone Number:** 780 248 5574  
**Phone Number:** 780 248 5440

|                                                                                                                                                                            | <u>Yes</u>                                  | <u>No</u>                |
|----------------------------------------------------------------------------------------------------------------------------------------------------------------------------|---------------------------------------------|--------------------------|
| Do you understand that you and your child have been asked to be in a research study?                                                                                       | <input type="checkbox"/>                    | <input type="checkbox"/> |
| Have you read and received a copy of the attached Information Sheet?                                                                                                       | <input type="checkbox"/>                    | <input type="checkbox"/> |
| Do you understand the benefits and risks involved in taking part in this research study?                                                                                   | <input type="checkbox"/>                    | <input type="checkbox"/> |
| Have you had an opportunity to ask questions and discuss this study?                                                                                                       | <input type="checkbox"/>                    | <input type="checkbox"/> |
| Do you understand that you and your child are free to leave the study at any time, without having to give a reason and without affecting your child's future medical care? | <input type="checkbox"/>                    | <input type="checkbox"/> |
| Has the issue of confidentiality been explained to you?                                                                                                                    | <input type="checkbox"/>                    | <input type="checkbox"/> |
| Do you understand who will have access to your child's records, including personally identifiable health information?                                                      | <input type="checkbox"/>                    | <input type="checkbox"/> |
| Who explained this study to you? _____                                                                                                                                     |                                             |                          |
| I agree for my child and I to take part in this study, and I have the legal authority to give this consent.                                                                |                                             |                          |
| Signature of Parent or Guardian _____                                                                                                                                      |                                             |                          |
| (Printed Name) _____                                                                                                                                                       |                                             |                          |
| Date: _____                                                                                                                                                                | Time: _____ : _____ AM / PM<br>(circle one) |                          |
| I believe that the person signing this form understands what is involved in the study and voluntarily agrees to participate.                                               |                                             |                          |
| Signature of Investigator or Designee _____                                                                                                                                |                                             |                          |
| Date: _____<br>(dd / mmm / yyyy)                                                                                                                                           | Time: _____ : _____ (24h clock)             |                          |

**THE INFORMATION SHEET MUST BE ATTACHED TO THIS CONSENT FORM AND A SIGNED COPY GIVEN TO THE RESEARCH PARTICIPANT**

---

**CHILD ASSENT FORM**

**Title of Study:** A Study of Non-Steroidal or Opioid Analgesia Use for Children with Musculoskeletal Injuries: The No OUCH Trials

**Principal Investigator:** Dr. Samina Ali

**Phone Number:** (780) 248-5574

**Study Coordinator:** Ms. Manasi Rajagopal

**Phone Number:** (780) 248-5440

We want to tell you about a research study we are doing. A research study is a way to learn new information about something. Children do not need to be in a research study if they don't want to.

**Why am I being asked to be in this study?**

We would like to find out more about what pain medicine works best for children with sprains or broken bones. You are being asked to join the study because you have pain due to an injury. Over 500 kids will take part in this study.

**If I join the study, what will I have to do?**

If you and your parent agree to take part, we will ask you to do a few things:

- First, we will ask you to take some pain medicines.
- Then, we will ask you to tell us about your pain, how you are feeling, and if you have any bad effects from the medicines we gave you.
- While you are in the emergency department, we will also check your heart rate and breathing.
- After you leave here, we will call or email your parents tomorrow and again after 1 week, to see how you are doing.

**Will any part of the study hurt?**

No, but sometimes kids can feel a little bit tired or sleepy after taking pain medicine. It is possible that you might feel this, but your parents and the research nurse will be there to help you, if this happens.

**Will the study help me?**

If you take part in this study, we hope the medicine we give you will help you. Even if you don't take part in the study, you can still ask your nurse for pain medicine, if you need it.

**Will the study help others?**

This study will help us figure out the best way to take care of kids' pain in the future.

**What do I get for being in this study?**

There are no direct cash or gifts for you for helping with this study.

**Can I say no?**

Yes, of course, you do not have to be in the study. It's up to you. If you do join the study, you can change your mind and stop being part of it at any time. No one will upset if you decide you don't want to do this study or if you decide to stop part way through. You can tell your parents, your doctor or the research nurse if you want to quit. Before you say **yes or no** to being in this study, the research nurse will answer any questions you have. If you join the study, you can ask questions at any time.

**What other choices do I have if I say no to this study?**

If you choose not to be in this study, your doctor and nurse will decide what pain medicines to give you. The three medicines that we are using in this study are the most commonly used medicines for this type of injury.

**Do my parents know about this study?**

This study was explained to your parents and they said that we could ask you if you want to be in it. You can talk this over with them before you decide.

**Who will see information about me?**

The information collected about you during this study will be kept safe. Nobody will know it except the people doing the research. The study information about you will NOT be given to your friends or teachers or anybody else.

**What if I have any questions?**

You can ask your mom or dad about anything you don't understand. You can also talk to the research nurse who is here, today. Dr. Samina Ali is the main doctor in charge of this study. If you have any questions about this study that you didn't think of now, either you can call or have your parents call her at 780 248 5574. You will be given a copy of this paper to keep.

**Would you like to take part in this study?**
 **Yes, I will be in this research study.**
 **No, I don't want to do this.**

\_\_\_\_\_ : \_\_\_\_\_ am / pm  
 Child's Name                      Signature of Child                      Date                      (circle one)

 Assent was obtained verbally

Age at the time of assent: \_\_\_\_\_ years

\_\_\_\_\_ : \_\_\_\_\_  
 Person obtaining Assent                      Signature                      Date (dd/ mmm/yyyy)                      (24h clock)

## A study of Non-Steroidal Or Opioid Analgesia Use for Children with Musculoskeletal Injuries: The No OUCH Trials

| REB # :            | Screening ID                               | Enrolment Date               |
|--------------------|--------------------------------------------|------------------------------|
| PI: Dr. Samina Ali | _____ - _____<br>(site) (screening number) | ___/___/20___<br>dd mmm yyyy |

## REDCap Forms: Summary

| Time Point / Section                          |                                                                                                                                                                                                                                                                                                         |
|-----------------------------------------------|---------------------------------------------------------------------------------------------------------------------------------------------------------------------------------------------------------------------------------------------------------------------------------------------------------|
| <b>Screening</b>                              | <ul style="list-style-type: none"> <li>➤ Pre-Screening</li> <li>➤ Eligibility</li> <li>➤ Informed Consent</li> <li>➤ Evaluation 1 (TR)</li> <li>➤ Injury Details and Previous History</li> <li>➤ Medical Oversight of Screening</li> </ul>                                                              |
| <b>T0 (Time of Study Drug Administration)</b> | <ul style="list-style-type: none"> <li>➤ Selection of Family Preference</li> <li>➤ Study Drug Administration</li> <li>➤ Evaluation 2 (T0)</li> <li>➤ Evaluation Time point Calculator (will be programmed in REDCap)</li> <li>➤ Contact Information Sheet</li> <li>➤ In PED Caregiver Survey</li> </ul> |
| <b>T30</b>                                    | <ul style="list-style-type: none"> <li>➤ Evaluation 3</li> </ul>                                                                                                                                                                                                                                        |
| <b>T60</b>                                    | <ul style="list-style-type: none"> <li>➤ Evaluation 4</li> </ul>                                                                                                                                                                                                                                        |
| <b>T90</b>                                    | <ul style="list-style-type: none"> <li>➤ Evaluation 5</li> </ul>                                                                                                                                                                                                                                        |
| <b>T120</b>                                   | <ul style="list-style-type: none"> <li>➤ Evaluation 6</li> </ul>                                                                                                                                                                                                                                        |
| <b>TME (Time of Medical Exam)</b>             | <ul style="list-style-type: none"> <li>➤ Evaluation 7</li> </ul>                                                                                                                                                                                                                                        |
| <b>TXR (Time of X-Ray)</b>                    | <ul style="list-style-type: none"> <li>➤ Evaluation 8</li> </ul>                                                                                                                                                                                                                                        |
| <b>PRE-Discharge</b>                          | <ul style="list-style-type: none"> <li>➤ ED Discharge Evaluation (only complete if discharged before 120 min)</li> <li>➤ Pre-discharge Questions (complete with ALL families)</li> </ul>                                                                                                                |
| <b>POST-Discharge</b>                         | <ul style="list-style-type: none"> <li>➤ Post-discharge Questions</li> </ul>                                                                                                                                                                                                                            |
| <b>Follow-up Survey 1 (24h)</b>               | <ul style="list-style-type: none"> <li>➤ Call Log</li> <li>➤ Follow-up Survey 1 (24h)</li> </ul>                                                                                                                                                                                                        |
| <b>Follow-up Survey 2 (1-2w)</b>              | <ul style="list-style-type: none"> <li>➤ Call Log</li> <li>➤ Follow-up Survey 1 (1-2w)</li> </ul>                                                                                                                                                                                                       |
| <b>Logs</b>                                   | <ul style="list-style-type: none"> <li>➤ Concomitant and Rescue Medications</li> <li>➤ Adverse Events</li> <li>➤ Protocol Deviations</li> <li>➤ Unanticipated Problems</li> <li>➤ Early Withdrawal Form</li> </ul>                                                                                      |



A study of Non-Steroidal Or Opioid Analgesia Use for Children with Musculoskeletal Injuries: The No OUCH Trials

| REB # :            | Screening ID                               | Enrolment Date               |
|--------------------|--------------------------------------------|------------------------------|
| PI: Dr. Samina Ali | _____ - _____<br>(site) (screening number) | ___/___/20___<br>dd mmm yyyy |

**Pre-Screening (electronic SEMO Log)**

|                                                         |                                                                                                                                                                                                                                                                                                                                   |                                 |
|---------------------------------------------------------|-----------------------------------------------------------------------------------------------------------------------------------------------------------------------------------------------------------------------------------------------------------------------------------------------------------------------------------|---------------------------------|
| Site                                                    | <input type="checkbox"/> Edmonton AB (1)<br><input type="checkbox"/> Calgary AB (2)<br><input type="checkbox"/> Winnipeg MB (3)<br><input type="checkbox"/> Montreal QC (4)<br><input type="checkbox"/> London ON (5)<br><input type="checkbox"/> Ottawa ON (6)                                                                   |                                 |
| Name of Research Nurse completing screening / enrolment | First and Last Name                                                                                                                                                                                                                                                                                                               |                                 |
| Date and Time of Triage                                 | ___/___/___<br>dd mmm yyyy<br>___:___<br>(24 hour clock)                                                                                                                                                                                                                                                                          |                                 |
| Age                                                     | _____ years                                                                                                                                                                                                                                                                                                                       |                                 |
| Sex                                                     | <input type="checkbox"/> Male                                                                                                                                                                                                                                                                                                     | <input type="checkbox"/> Female |
| Was the family approached for this study?               | <input type="checkbox"/> Yes                                                                                                                                                                                                                                                                                                      | <input type="checkbox"/> No     |
| <u>If NO,</u> specify reason and STOP HERE.             | <input type="checkbox"/> Family refused overall consent to be approached for research<br><input type="checkbox"/> Legal guardian not present<br><input type="checkbox"/> RA busy with another study<br><input type="checkbox"/> Did not meet eligibility criteria, specify _____<br><input type="checkbox"/> Other, Specify _____ |                                 |
| <u>If YES,</u> continue to Eligibility.                 |                                                                                                                                                                                                                                                                                                                                   |                                 |

**A study of Non-Steroidal Or Opioid Analgesia Use for Children with Musculoskeletal Injuries: The No OUCH Trials**

| REB # :            | Screening ID                             | Enrolment Date                   |
|--------------------|------------------------------------------|----------------------------------|
| PI: Dr. Samina Ali | ____ - ____<br>(site) (screening number) | ___ / ___ / 20___<br>dd mmm yyyy |

## Eligibility

Was verbal consent for screening obtained from the family?  Yes  No

## Inclusion Criteria

|                                                                                                                                                                                               |                              |                             |
|-----------------------------------------------------------------------------------------------------------------------------------------------------------------------------------------------|------------------------------|-----------------------------|
| 1. Child aged 6-17 years                                                                                                                                                                      | <input type="checkbox"/> Yes | <input type="checkbox"/> No |
| 2. Presenting to the emergency department with an acute limb injury (<24 hours old) that is neither obviously deformed nor having neuro-vascular compromise (as assessed by the triage nurse) | <input type="checkbox"/> Yes | <input type="checkbox"/> No |
| 3. Self-reported pain score $\geq 5$ on the 0 to 10 verbal Numerical Rating Scale (vNRS) at triage                                                                                            | <input type="checkbox"/> Yes | <input type="checkbox"/> No |

## Exclusion Criteria

|                                                                                                                                   |                              |                             |
|-----------------------------------------------------------------------------------------------------------------------------------|------------------------------|-----------------------------|
| 1. Deemed to require intravenous (IV) or intranasal (IN) pain medications by the clinical team                                    | <input type="checkbox"/> Yes | <input type="checkbox"/> No |
| 2. Previously known hypersensitivity to study medications                                                                         | <input type="checkbox"/> Yes | <input type="checkbox"/> No |
| 3. Acetaminophen or non-steroidal anti-inflammatory medication (NSAID) use, within 3 hours prior to recruitment                   | <input type="checkbox"/> Yes | <input type="checkbox"/> No |
| 4. Opioid use within 1 hour prior to recruitment                                                                                  | <input type="checkbox"/> Yes | <input type="checkbox"/> No |
| 5. Caregiver and/or child cognitive impairment precluding the ability to self-report pain or respond to study questions           | <input type="checkbox"/> Yes | <input type="checkbox"/> No |
| 6. Injury suspected to be due to non-accidental trauma/ child abuse (as assessed by the triage nurse or reported by the family)   | <input type="checkbox"/> Yes | <input type="checkbox"/> No |
| 7. Suspected multi-limb fracture                                                                                                  | <input type="checkbox"/> Yes | <input type="checkbox"/> No |
| 8. Chronic pain that necessitates daily analgesic use                                                                             | <input type="checkbox"/> Yes | <input type="checkbox"/> No |
| 9. Hepatic or renal disease/dysfunction                                                                                           | <input type="checkbox"/> Yes | <input type="checkbox"/> No |
| 10. Bleeding disorder                                                                                                             | <input type="checkbox"/> Yes | <input type="checkbox"/> No |
| 11. Known pregnancy                                                                                                               | <input type="checkbox"/> Yes | <input type="checkbox"/> No |
| 12. Vomiting that precludes the ability to take oral medications (as determined by the family)                                    | <input type="checkbox"/> Yes | <input type="checkbox"/> No |
| 13. Caregiver and/or child inability to communicate fluently in English or French in the absence of a native language interpreter | <input type="checkbox"/> Yes | <input type="checkbox"/> No |
| 14. Caregiver unavailable for follow-up                                                                                           | <input type="checkbox"/> Yes | <input type="checkbox"/> No |
| 15. Previous enrollment in study                                                                                                  | <input type="checkbox"/> Yes | <input type="checkbox"/> No |

**REDCap to display if family is eligible or not based on above answers. RRN to confirm below.**

|                               |                              |                             |
|-------------------------------|------------------------------|-----------------------------|
| Is family eligible for study? | <input type="checkbox"/> Yes | <input type="checkbox"/> No |
|-------------------------------|------------------------------|-----------------------------|

**A study of Non-Steroidal Or Opioid Analgesia Use for Children with Musculoskeletal Injuries: The No OUCH Trials**

| REB # :            | Screening ID                             | Enrolment Date                      |
|--------------------|------------------------------------------|-------------------------------------|
| PI: Dr. Samina Ali | ____ - ____<br>(site) (screening number) | ____ / ____ / 20____<br>dd mmm yyyy |

**Informed Consent**

|                                                                                                                                                                                                                               |                                                                                                                                                  |
|-------------------------------------------------------------------------------------------------------------------------------------------------------------------------------------------------------------------------------|--------------------------------------------------------------------------------------------------------------------------------------------------|
| Has written informed consent been obtained?                                                                                                                                                                                   | <input type="checkbox"/> Yes<br><input type="checkbox"/> No                                                                                      |
| <b>If NO</b> , specify reason and STOP HERE.                                                                                                                                                                                  | <input type="checkbox"/> Declined consent<br><input type="checkbox"/> Declined assent<br><input type="checkbox"/> Other, please specify<br>_____ |
| <b>If YES</b> , specify the date and time of Informed Consent:                                                                                                                                                                | ____ / ____ / ____<br>dd mmm yyyy<br>____ : ____<br>(24 hour clock)                                                                              |
| Has a copy of the signed informed consent been given to the family?                                                                                                                                                           | <input type="checkbox"/> Yes<br><input type="checkbox"/> No                                                                                      |
| <i>If no, specify reason:</i>                                                                                                                                                                                                 |                                                                                                                                                  |
| Has written assent been obtained?                                                                                                                                                                                             | <input type="checkbox"/> Yes<br><input type="checkbox"/> No<br><input type="checkbox"/> No, but verbal assent was obtained and documented        |
| <i>If no, specify reason and STOP HERE.</i>                                                                                                                                                                                   |                                                                                                                                                  |
| Has a copy of the signed assent been given to the family?                                                                                                                                                                     | <input type="checkbox"/> Yes<br><input type="checkbox"/> No                                                                                      |
| <i>If no, specify reason:</i>                                                                                                                                                                                                 |                                                                                                                                                  |
| Permission to contact for future studies?                                                                                                                                                                                     | <input type="checkbox"/> Yes<br><input type="checkbox"/> No                                                                                      |
| [Stollery Site ONLY] Would you be interested in being contacted, later, about a second related study? We want to better understand how parents make medical decisions for their children when they are injured and have pain. | <input type="checkbox"/> Yes<br><input type="checkbox"/> No                                                                                      |

**If ALL the inclusion and exclusion criteria are met AND written consent and assent have been obtained, please proceed.**

**If NOT, please STOP here.**



A study of Non-Steroidal Or Opioid Analgesia Use for Children with Musculoskeletal Injuries: The No OUCH Trials

| REB # :            | Screening ID                             | Enrolment Date                      |
|--------------------|------------------------------------------|-------------------------------------|
| PI: Dr. Samina Ali | ____ - ____<br>(site) (screening number) | ____ / ____ / 20____<br>dd mmm yyyy |

**Injury Details and Previous History**

|                                 |                                                          |
|---------------------------------|----------------------------------------------------------|
| <u>Date and Time of Injury:</u> | ____ / ____ / ____ : ____<br>dd mmm yyyy (24 hour clock) |
|---------------------------------|----------------------------------------------------------|

| <u>Location of Primary Injury:</u>                                                                                                                                                                                                                                                                                              |                                                                                                                                                                                                                                                                               |
|---------------------------------------------------------------------------------------------------------------------------------------------------------------------------------------------------------------------------------------------------------------------------------------------------------------------------------|-------------------------------------------------------------------------------------------------------------------------------------------------------------------------------------------------------------------------------------------------------------------------------|
| Please select the location of the PRIMARY injury (pick ONE only)                                                                                                                                                                                                                                                                |                                                                                                                                                                                                                                                                               |
| <input type="checkbox"/> Single or Multiple Fingers (if ONLY injury)<br><input type="checkbox"/> Hand<br><input type="checkbox"/> Wrist<br><input type="checkbox"/> Forearm<br><input type="checkbox"/> Elbow<br><input type="checkbox"/> Upper Arm<br><input type="checkbox"/> Shoulder<br><input type="checkbox"/> Collarbone | <input type="checkbox"/> Single or Multiple Toes (if ONLY injury)<br><input type="checkbox"/> Foot<br><input type="checkbox"/> Ankle<br><input type="checkbox"/> Lower leg<br><input type="checkbox"/> Knee<br><input type="checkbox"/> Thigh<br><input type="checkbox"/> Hip |

| <u>Concomitant Digit Injury:</u>                                                  |                                                                                                         |
|-----------------------------------------------------------------------------------|---------------------------------------------------------------------------------------------------------|
| Is there a concomitant digit injury present <b><u>on the same limb?</u></b>       | <input type="checkbox"/> Yes<br><input type="checkbox"/> No                                             |
| <u>If yes,</u> please select the location of the secondary injury (pick ONE only) | <input type="checkbox"/> Single or Multiple fingers<br><input type="checkbox"/> Single or Multiple toes |

|                                                   |                                                                                                      |
|---------------------------------------------------|------------------------------------------------------------------------------------------------------|
| <u>Concomitant Medications</u>                    |                                                                                                      |
| Have any medications been given since the injury? | <input type="checkbox"/> Yes – (Fill out Concomitant Medication Form)<br><input type="checkbox"/> No |

**A study of Non-Steroidal Or Opioid Analgesia Use for Children with Musculoskeletal Injuries: The No OUCH Trials**

| REB # :            | Screening ID                               | Enrolment Date               |
|--------------------|--------------------------------------------|------------------------------|
| PI: Dr. Samina Ali | _____ - _____<br>(site) (screening number) | ___/___/20___<br>dd mmm yyyy |

## Medical Oversight of Screening

|                                                                                                                                                                                         |                                                                                                                                                                                                                                                                                                             |
|-----------------------------------------------------------------------------------------------------------------------------------------------------------------------------------------|-------------------------------------------------------------------------------------------------------------------------------------------------------------------------------------------------------------------------------------------------------------------------------------------------------------|
| Eligibility of the participant has been confirmed by:                                                                                                                                   | <input type="checkbox"/> PI / Site Investigator (in person)<br><input type="checkbox"/> PI / Site Investigator (by phone)<br><input type="checkbox"/> Third party physician<br>Purpose: to review the inclusion and exclusion criteria on this form and confirm that the patient meets the criteria listed. |
| If PI/ Site Investigator, specify:<br>PI / Site Investigator Physician Name:<br>_____<br>Date and time of confirmation:<br>_____ / _____ / _____ : _____<br>dd mmm yyyy (24 hour clock) | _____<br>_____                                                                                                                                                                                                                                                                                              |
| If Third party physician, specify:<br>Third party Physician Name:<br>_____<br>Date and time of confirmation:<br>_____ / _____ / _____ : _____<br>dd mmm yyyy (24 hour clock)            | _____<br>_____                                                                                                                                                                                                                                                                                              |

A study of Non-Steroidal Or Opioid Analgesia Use for Children with Musculoskeletal Injuries: The No OUCH Trials

| REB # :            | Screening ID                               | Enrolment Date                   |
|--------------------|--------------------------------------------|----------------------------------|
| PI: Dr. Samina Ali | _____ - _____<br>(site) (screening number) | ___ / ___ / 20___<br>dd mmm yyyy |

## Selection of Family Preference

**To Caregiver and Child:** "At this point, we need you to tell us which study group you would like to participate in: Group 1 or Group 2. Regardless of which study you choose, you / your child will, at minimum, receive ibuprofen (Advil) for their pain. Both groups include commonly used pain medicines for this type of pain, however Group 2 includes all three of the pain medicine options offered in this study. So, if you don't have a preference, we will assign you to Group 2.

- If you choose Group 2, you/your child will have an equal chance of receiving **either**:
  - Ibuprofen (Advil) AND placebos (inactive ingredient)
  - Ibuprofen (Advil) AND acetaminophen (Tylenol)
  - Ibuprofen (Advil) AND hydromorphone (Dilaudid)
- If you choose Group 1, you/your child will have an equal chance of receiving **either**:
  - Ibuprofen (Advil) AND placebo (inactive ingredient)
  - Ibuprofen (Advil) AND acetaminophen (Tylenol)

To help you in making your choice, here is some more information about these medicines.

1. Ibuprofen (Advil) is typically provided for the kind of injury you/your child has, but it may not always be strong enough to treat a child's pain.
  2. When a child needs something stronger than ibuprofen (Advil) for their pain, acetaminophen (Tylenol) and opioid medicines like hydromorphone (Dilaudid) are the most commonly recommended pain killers to be added to the ibuprofen.
  3. Please remember that if you feel that you/your child needs more pain medicine at any point during the study period, you or our research nurse can let your doctor know right away.
- Which study would you like to be a part of: Group 1 or Group 2?
  - [NOTE: If the family wishes to speak to a health care professional prior to making their study choice, the RA will then identify a clinical team member to aid them.]

### Indicate family preference below:

- Group 1:** Non-Opioid trial [N]
- Group 2:** Opioid trial [O]
- No preference → Proceed to enroll in  **Group 2:** Opioid trial [O]
- Family unable to reach consensus regarding preference. [If this is chosen, STOP enrolment now]

**A study of Non-Steroidal Or Opioid Analgesia Use for Children with Musculoskeletal Injuries: The No OUCH Trials**

| REB # :            | Screening ID                              | Enrolment Date                   |
|--------------------|-------------------------------------------|----------------------------------|
| PI: Dr. Samina Ali | ____ - _____<br>(site) (screening number) | ___ / ___ / 20___<br>dd mmm yyyy |

Once the **Preference Group** has been selected by the family, please retrieve the following study medication kit from your medication dispensing area:

| Pharmacy Kit Number:                                              |
|-------------------------------------------------------------------|
| ____ - ____ - _____<br>(site - preference group - patient number) |

For peer review only



A study of Non-Steroidal Or Opioid Analgesia Use for Children with Musculoskeletal Injuries: The No OUCH Trials

| REB # :            | Study ID                                                         | Enrolment Date                      |
|--------------------|------------------------------------------------------------------|-------------------------------------|
| PI: Dr. Samina Ali | ____ - ____ - ____<br>(site - preference group - patient number) | ____ / ____ / 20____<br>dd mmm yyyy |

**Study Drugs Administration**

|                                                                                                        |                                                                                                                                                                                                                  |
|--------------------------------------------------------------------------------------------------------|------------------------------------------------------------------------------------------------------------------------------------------------------------------------------------------------------------------|
| Confirmed that the pharmacy kit is not expired?                                                        | <input type="checkbox"/> Yes<br><input type="checkbox"/> No* If “NO”, check before proceeding                                                                                                                    |
| Are the noted min. and max. temperatures of the drug storage fridge within the required ranges, today? | <input type="checkbox"/> Yes<br><input type="checkbox"/> No* If “NO”, check temperatures before proceeding                                                                                                       |
| Weight:                                                                                                | _____ kg<br><br><input type="checkbox"/> Measured on scale<br><input type="checkbox"/> Estimate provided by parent                                                                                               |
| <b>Ibuprofen (40mg/ml)</b><br>(up to <b>600 mg</b> maximum – <b>15 ml</b> maximum)                     | <b>Dose: 10 mg per kg</b><br>Calculation: _____ kg x 10 = _____ mg<br><br><b>Volume: 40mg = 1 ml</b><br>Calculation: _____ mg ÷ 40mg/ml = _____ ml<br><br><b>Volume actually dispensed to patient: _____ ml</b>  |
| <b>Acetaminophen or Placebo (80mg/ml)</b><br>(up to <b>1000 mg</b> maximum – <b>12.5 ml</b> maximum)   | <b>Dose: 15 mg per kg</b><br>Calculation: _____ kg x 15 = _____ mg<br><br><b>Volume: 80mg = 1 ml</b><br>Calculation: _____ mg ÷ 80 mg/kg = _____ ml<br><br><b>Volume actually dispensed to patient: _____ ml</b> |

## A study of Non-Steroidal Or Opioid Analgesia Use for Children with Musculoskeletal Injuries: The No OUCH Trials

| REB # :            | Study ID                                                         | Enrolment Date                      |
|--------------------|------------------------------------------------------------------|-------------------------------------|
| PI: Dr. Samina Ali | ____ - ____ - ____<br>(site - preference group - patient number) | ____ / ____ / 20____<br>dd mmm yyyy |

|                                                                                                                                                                        |                                                                                                                                                                                                                        |
|------------------------------------------------------------------------------------------------------------------------------------------------------------------------|------------------------------------------------------------------------------------------------------------------------------------------------------------------------------------------------------------------------|
| <b>Hydromorphone or Placebo (1mg/ml)</b><br><b>(up to 5 mg maximum – 5 ml maximum)</b><br><br><b>ONLY for participants enrolled in Group 2:</b><br><b>Opioid trial</b> | <b>Dose: 0.05 mg per kg</b><br><br>Calculation: ____ kg x 0.05 = ____ mg<br><br><b>Volume: 1 mg = 1 ml</b><br><br>Calculation: ____ mg ÷ 1 mg/ml = ____ ml<br><br><b>Volume actually dispensed to patient: ____ ml</b> |
| *Dose calculation and dispensing in syringe must be verified by a second nurse:                                                                                        | Verified by:<br>_____                                                                                                                                                                                                  |
| Date and time of study drugs administration:                                                                                                                           | ____ / ____ / ____<br>dd mmm yyyy<br><br>____ : ____<br>(24 hour clock)                                                                                                                                                |
| Has the participant taken the full dose of each syringe?                                                                                                               | <input type="checkbox"/> Yes <input type="checkbox"/> No* <i>If "NO", please comment</i>                                                                                                                               |
| Were all study drugs administered one after the other?                                                                                                                 | <input type="checkbox"/> Yes <input type="checkbox"/> No* <i>If "NO", please comment</i>                                                                                                                               |
| Was dispensing of the study drugs recorded on the patient's clinical chart?                                                                                            | <input type="checkbox"/> Yes <input type="checkbox"/> No* <i>If "NO", please comment</i>                                                                                                                               |
| <u>Comments:</u><br><br>                                                                                                                                               |                                                                                                                                                                                                                        |

**A study of Non-Steroidal Or Opioid Analgesia Use for Children with Musculoskeletal Injuries: The No OUCH Trials**

| REB # :            | Study ID                                                            | Enrolment Date                       |
|--------------------|---------------------------------------------------------------------|--------------------------------------|
| PI: Dr. Samina Ali | _____ - _____ - _____<br>(site - preference group - patient number) | ___ / ___ / 20___<br>dd / mmm / yyyy |

**Evaluation # 2 (T0 – Immediately after Study Drug Administration)**

**Time due: dd/ mmm/ yyyy HH:MM ± 10 min**

|                                                                                                                                                                                                                                                                                                                                                                                                                                                                                                                                                                                                                                                                                                                                                                                       |                                                                                                                                                                                                                                  |
|---------------------------------------------------------------------------------------------------------------------------------------------------------------------------------------------------------------------------------------------------------------------------------------------------------------------------------------------------------------------------------------------------------------------------------------------------------------------------------------------------------------------------------------------------------------------------------------------------------------------------------------------------------------------------------------------------------------------------------------------------------------------------------------|----------------------------------------------------------------------------------------------------------------------------------------------------------------------------------------------------------------------------------|
| Was this evaluation completed?                                                                                                                                                                                                                                                                                                                                                                                                                                                                                                                                                                                                                                                                                                                                                        | <input type="checkbox"/> Yes <input type="checkbox"/> No                                                                                                                                                                         |
| If Yes, continue. If No, specify reason:                                                                                                                                                                                                                                                                                                                                                                                                                                                                                                                                                                                                                                                                                                                                              |                                                                                                                                                                                                                                  |
| <u>Date and Time of evaluation # 2:</u>                                                                                                                                                                                                                                                                                                                                                                                                                                                                                                                                                                                                                                                                                                                                               | ___ / ___ / ___<br>dd / mmm / yyyy<br>: ___<br>(24 hour clock)                                                                                                                                                                   |
| <u>Pain and Sedation Scores:</u><br><b>vNRS</b><br><i>“On a scale of 0 to 10, where 0 is no pain and 10 is the worst pain you can imagine, what is your pain level now?”</i><br><br><b>VAS</b><br><i>“What is your pain level on this sliding scale, where 0 means absence of pain and 100 is the worst pain you have ever experienced?”</i><br><br><b>FPS-R</b><br><i>“These faces show how much something can hurt. This face (point to left most face) shows no pain. The faces show more and more pain (point from left to right) up to this one (point to right most face) – it shows very much pain. Can you point to the face that shows how much you hurt right now?”</i><br><i>Note: say “hurt” or “pain” whichever seems right for a particular child</i><br><br><b>RSS</b> | <br><br>_____/10<br><br>_____/100 mm<br><br><input type="checkbox"/> 0 <input type="checkbox"/> 2 <input type="checkbox"/> 4<br><input type="checkbox"/> 6 <input type="checkbox"/> 8 <input type="checkbox"/> 10<br><br>_____/6 |

## A study of Non-Steroidal Or Opioid Analgesia Use for Children with Musculoskeletal Injuries: The No OUCH Trials

| REB # :            | Study ID                                                         | Enrolment Date                       |
|--------------------|------------------------------------------------------------------|--------------------------------------|
| PI: Dr. Samina Ali | ____ - ____ - ____<br>(site - preference group - patient number) | ___ / ___ / 20___<br>dd / mmm / yyyy |

## Contact Information Sheet

|                                   |                                                                           |                    |
|-----------------------------------|---------------------------------------------------------------------------|--------------------|
| <b>Child's Name:</b>              | _____<br>First name                                                       | _____<br>Last name |
| <b>Age:</b>                       | _____ years                                                               |                    |
| <b>Sex:</b>                       | <input type="checkbox"/> Male <input type="checkbox"/> Female             |                    |
| <b>Caregiver's Name:</b>          | _____<br>First name                                                       | _____<br>Last name |
|                                   | Specify relationship to child: _____                                      |                    |
| <b>Preferred Mode of Contact:</b> | <input type="checkbox"/> Email <input type="checkbox"/> Phone             |                    |
| <b>Email:</b>                     | _____                                                                     |                    |
| <b>Preferred Phone Number:</b>    | ( _____ ) _____ - _____                                                   |                    |
| <b>Alternate Phone Number:</b>    | ( _____ ) _____ - _____                                                   |                    |
| <b>Time for follow up call:</b>   | <input type="checkbox"/> AM <input type="checkbox"/> PM    Specify: _____ |                    |

A study of Non-Steroidal Or Opioid Analgesia Use for Children with Musculoskeletal Injuries: The No OUCH Trials

| REB # :            | Study ID                                                         | Enrolment Date                    |
|--------------------|------------------------------------------------------------------|-----------------------------------|
| PI: Dr. Samina Ali | ____ - ____ - ____<br>(site - preference group - patient number) | __ / __ / 20__<br>dd / mmm / yyyy |

**In PED Caregiver Survey**

| Your Information                                               |                                                                                                                                                                                                                                                                                                                            |
|----------------------------------------------------------------|----------------------------------------------------------------------------------------------------------------------------------------------------------------------------------------------------------------------------------------------------------------------------------------------------------------------------|
| What is YOUR age, in years?                                    | _____ years                                                                                                                                                                                                                                                                                                                |
| What is YOUR sex?                                              | <input type="checkbox"/> Male<br><input type="checkbox"/> Female<br><input type="checkbox"/> Other, specify: _____<br><input type="checkbox"/> Decline to answer                                                                                                                                                           |
| What is your home postal code? (1 <sup>st</sup> 3 digits only) | ____                                                                                                                                                                                                                                                                                                                       |
| What is your highest level of Education?                       | <input type="checkbox"/> Elementary School<br><input type="checkbox"/> High School or some High School<br><input type="checkbox"/> Diploma/Certificate<br><input type="checkbox"/> Some Post-Secondary/University<br><input type="checkbox"/> University/Professional Degree<br><input type="checkbox"/> Decline to answer |
| What is your annual household income from all sources?         | <input type="checkbox"/> Less than or equal to \$25,000<br><input type="checkbox"/> \$25,001 to \$50,000<br><input type="checkbox"/> \$50,001 to \$75,000<br><input type="checkbox"/> \$75,000 to \$100,000<br><input type="checkbox"/> Greater than \$100,000<br><input type="checkbox"/> Decline to answer               |

| Injury Details                     |                                                                                                                                                                                                                                                                                                                                                                                                                                                                                                                                                                                                                                                           |
|------------------------------------|-----------------------------------------------------------------------------------------------------------------------------------------------------------------------------------------------------------------------------------------------------------------------------------------------------------------------------------------------------------------------------------------------------------------------------------------------------------------------------------------------------------------------------------------------------------------------------------------------------------------------------------------------------------|
| How did your child's injury occur? | <input type="checkbox"/> Motor Vehicle Collision/ Road Traffic Accident<br><input type="checkbox"/> Sports Injury <ul style="list-style-type: none"> <li><input type="checkbox"/> Ice Hockey/ Hockey</li> <li><input type="checkbox"/> Football</li> <li><input type="checkbox"/> Soccer</li> <li><input type="checkbox"/> Wrestling</li> <li><input type="checkbox"/> Basketball</li> <li><input type="checkbox"/> Gymnastics/ Cheerleading</li> <li><input type="checkbox"/> Skiing/ Snowboarding</li> <li><input type="checkbox"/> Biking</li> <li><input type="checkbox"/> Other sport, specify: _____</li> </ul> <input type="checkbox"/> Trampoline |

**A study of Non-Steroidal Or Opioid Analgesia Use for Children with Musculoskeletal Injuries: The No OUCH Trials**

| REB # :            | Study ID                                                            | Enrolment Date                             |
|--------------------|---------------------------------------------------------------------|--------------------------------------------|
| PI: Dr. Samina Ali | _____ - _____ - _____<br>(site - preference group - patient number) | ___ / ___ / 20___<br>dd      mmm      yyyy |

|                                                                                                        |                                                                                                                                                                                                                                                                                              |
|--------------------------------------------------------------------------------------------------------|----------------------------------------------------------------------------------------------------------------------------------------------------------------------------------------------------------------------------------------------------------------------------------------------|
|                                                                                                        | <input type="checkbox"/> Other play or activity<br><input type="checkbox"/> Other Slip, Trip or Fall<br><input type="checkbox"/> Other mechanism, specify: _____                                                                                                                             |
| Was the sports, play or activity supervised (ie. Were you or another adult there watching your child)? | <input type="checkbox"/> Yes<br><input type="checkbox"/> No<br><input type="checkbox"/> Unsure                                                                                                                                                                                               |
| Where did your child's injury occur?                                                                   | <input type="checkbox"/> Sports Field/ Arena<br><input type="checkbox"/> In School/ School playground<br><input type="checkbox"/> Playground/ Park<br><input type="checkbox"/> Home/ Friend's home<br><input type="checkbox"/> Road<br><input type="checkbox"/> Other, please specify: _____ |

| Study Preference                                                                                                                                                                                                                                                                                                                                                                       |                                                                                                                                                                                                                                                                                                                                                                                                                                                                                                                                                                                                                                                                                                           |
|----------------------------------------------------------------------------------------------------------------------------------------------------------------------------------------------------------------------------------------------------------------------------------------------------------------------------------------------------------------------------------------|-----------------------------------------------------------------------------------------------------------------------------------------------------------------------------------------------------------------------------------------------------------------------------------------------------------------------------------------------------------------------------------------------------------------------------------------------------------------------------------------------------------------------------------------------------------------------------------------------------------------------------------------------------------------------------------------------------------|
| <p>If they chose the Non-Opioid trial (Group 1):</p> <p>Please tell us your reason(s) for choosing <b>Group 1</b>, ie. the study with the possibility of receiving one of the following:</p> <ul style="list-style-type: none"> <li>○ Ibuprofen only (Advil)</li> <li>○ Ibuprofen (Advil) and Acetaminophen (Tylenol)</li> </ul> <p><i>Choose all that apply</i></p>                   | <input type="checkbox"/> I do not believe my child's pain is/ will be severe enough to require an opioid medicine (Hydromorphone/ Dilaudid)<br><input type="checkbox"/> I did not want my child to receive an opioid medicine<br><input type="checkbox"/> I do not think my child is old enough to receive an opioid medicine<br><input type="checkbox"/> I trust that both medicines in this study would work for my child, with their current level of pain<br><input type="checkbox"/> I think my child will get better care if they are a part of this study (ex. they will get treated faster, get close care from the research nurse etc.)<br><input type="checkbox"/> Other, please specify: _____ |
| <p>If they chose the Opioid trial (Group 2):</p> <p>Please tell us your reason(s) for choosing <b>Group 2</b>, ie. the study with the possibility of receiving one of the following:</p> <ul style="list-style-type: none"> <li>○ Ibuprofen only (Advil)</li> <li>○ Ibuprofen (Advil) and Acetaminophen (Tylenol)</li> <li>○ Ibuprofen (Advil) and Hydromorphone (Dilaudid)</li> </ul> | <input type="checkbox"/> I wanted to have the option of all 3 medicines, or combination of medicines, available to us<br><input type="checkbox"/> I wanted/hoped that my child will receive the opioid medicine (Hydromorphone/ Dilaudid) specifically<br><input type="checkbox"/> I believe that my child's pain is/ will be severe enough to require an opioid medicine<br><input type="checkbox"/> I believe that the pain relief benefits of the opioid medicine are greater than any possible side effects<br><input type="checkbox"/> I trust that any of the 3 options in this study would work for my child, with their current level of pain                                                     |

**A study of Non-Steroidal Or Opioid Analgesia Use for Children with Musculoskeletal Injuries: The No OUCH Trials**

| REB # :            | Study ID                                                         | Enrolment Date                    |
|--------------------|------------------------------------------------------------------|-----------------------------------|
| PI: Dr. Samina Ali | ____ - ____ - ____<br>(site - preference group - patient number) | __ / __ / 20__<br>dd / mmm / yyyy |

|                              |                                                                                                                                                                                                                                                                                                                                                                                                                        |
|------------------------------|------------------------------------------------------------------------------------------------------------------------------------------------------------------------------------------------------------------------------------------------------------------------------------------------------------------------------------------------------------------------------------------------------------------------|
| <p>Choose all that apply</p> | <input type="checkbox"/> I think my child will get better care if they are a part of this study (ex. they will get treated faster, get close care from the research nurse etc.)<br><input type="checkbox"/> Participating in this study will help researchers learn more about the use of opioids for treating injury-related pain for children in the future<br><input type="checkbox"/> Other, please specify: _____ |
|------------------------------|------------------------------------------------------------------------------------------------------------------------------------------------------------------------------------------------------------------------------------------------------------------------------------------------------------------------------------------------------------------------------------------------------------------------|

| Experience with Opioid Pain Medicines                                                                                                                                                                                                                                       |                                                                                                                                              |
|-----------------------------------------------------------------------------------------------------------------------------------------------------------------------------------------------------------------------------------------------------------------------------|----------------------------------------------------------------------------------------------------------------------------------------------|
| <p>Have YOU ever been prescribed or given an opioid medicine by a health care provider, in a clinic or hospital?</p> <p><i>Ex. Hydromorphone (Dilaudid), Morphine, Oxycodone (OxyContin, Percocet), Codeine, Fentanyl, Hydrocodone (Vicodin)</i></p>                        | <input type="checkbox"/> Yes<br><input type="checkbox"/> No<br><input type="checkbox"/> Unsure                                               |
| <p>Have any of your FAMILY MEMBERS ever been prescribed or given an opioid medicine by a health care provider, in a clinic or hospital?</p> <p><i>Ex. Hydromorphone (Dilaudid), Morphine, Oxycodone (OxyContin, Percocet), Codeine, Fentanyl, Hydrocodone (Vicodin)</i></p> | <input type="checkbox"/> Yes<br><input type="checkbox"/> No<br><input type="checkbox"/> Unsure                                               |
| <p>If yes, was this family member a CHILD?</p>                                                                                                                                                                                                                              | <input type="checkbox"/> Yes<br><input type="checkbox"/> No<br><input type="checkbox"/> Decline to Answer                                    |
| <p>Have you or a family member ever been diagnosed with a substance use disorder, or addiction to drugs/ alcohol?</p>                                                                                                                                                       | <input type="checkbox"/> Yes<br><input type="checkbox"/> No<br><input type="checkbox"/> Unsure<br><input type="checkbox"/> Decline to answer |
| <p>If yes, can you please specify which drug(s)/ substances?</p>                                                                                                                                                                                                            | <p>[Free text]</p>                                                                                                                           |

## A study of Non-Steroidal Or Opioid Analgesia Use for Children with Musculoskeletal Injuries: The No OUCH Trials

| REB # :            | Study ID                                                         | Enrolment Date                       |
|--------------------|------------------------------------------------------------------|--------------------------------------|
| PI: Dr. Samina Ali | ____ - ____ - ____<br>(site - preference group - patient number) | ___ / ___ / 20___<br>dd / mmm / yyyy |

## Evaluation # 3 (T30 – 30 minutes after study drugs administration)

Time due: dd/ mmm/ yyyy HH:MM ± 15 min

|                                                                                                                                                                                                                                                                                                                                                                                                                                                                                                                                                                                                                                                                                                                                               |                                                                                                                                                                                                              |
|-----------------------------------------------------------------------------------------------------------------------------------------------------------------------------------------------------------------------------------------------------------------------------------------------------------------------------------------------------------------------------------------------------------------------------------------------------------------------------------------------------------------------------------------------------------------------------------------------------------------------------------------------------------------------------------------------------------------------------------------------|--------------------------------------------------------------------------------------------------------------------------------------------------------------------------------------------------------------|
| Was this evaluation completed?                                                                                                                                                                                                                                                                                                                                                                                                                                                                                                                                                                                                                                                                                                                | <input type="checkbox"/> Yes <input type="checkbox"/> No                                                                                                                                                     |
| If Yes, continue. If No, specify reason:                                                                                                                                                                                                                                                                                                                                                                                                                                                                                                                                                                                                                                                                                                      | <input type="checkbox"/> Patient discharged before specified evaluation time<br><input type="checkbox"/> Other: _____                                                                                        |
| <u>Date and Time of evaluation # 3:</u>                                                                                                                                                                                                                                                                                                                                                                                                                                                                                                                                                                                                                                                                                                       | ___ / ___ / ___<br>dd / mmm / yyyy<br>_____<br>:_____<br>(24 hour clock)                                                                                                                                     |
| <u>Vital Signs:</u>                                                                                                                                                                                                                                                                                                                                                                                                                                                                                                                                                                                                                                                                                                                           | HR: _____ bpm<br>RR: _____ rpm<br>Sat: _____ %<br>BP: _____ / _____ mmHg                                                                                                                                     |
| <u>Pain and Sedation Scores:</u><br><b>vNRS</b><br>“On a scale of 0 to 10, where 0 is no pain and 10 is the worst pain you can imagine, what is your pain level now?”<br><b>VAS</b><br>“What is your pain level on this sliding scale, where 0 means absence of pain and 100 is the worst pain you have ever experienced?”<br><b>FPS-R</b><br>“These faces show how much something can hurt. This face (point to left most face) shows no pain. The faces show more and more pain (point from left to right) up to this one (point to right most face) – it shows very much pain. Can you point to the face that shows how much you hurt right now?”<br>Note: say “hurt” or “pain” whichever seems right for a particular child<br><b>RSS</b> | _____/10<br>_____/100 mm<br><input type="checkbox"/> 0 <input type="checkbox"/> 2 <input type="checkbox"/> 4<br><input type="checkbox"/> 6 <input type="checkbox"/> 8 <input type="checkbox"/> 10<br>_____/6 |
| <u>Any adverse events or side effects?</u><br>If “YES”, complete a separate entry for each AE on the AE Form. Do not suggest any AEs to the participant; let him/ her answer spontaneously.                                                                                                                                                                                                                                                                                                                                                                                                                                                                                                                                                   | <input type="checkbox"/> Yes – (Fill out Adverse Events Form)<br><input type="checkbox"/> No                                                                                                                 |



A study of Non-Steroidal Or Opioid Analgesia Use for Children with Musculoskeletal Injuries: The No OUCH Trials

| REB # :            | Study ID                                                         | Enrolment Date                       |
|--------------------|------------------------------------------------------------------|--------------------------------------|
| PI: Dr. Samina Ali | ____ - ____ - ____<br>(site - preference group - patient number) | ___ / ___ / 20___<br>dd / mmm / yyyy |

**Evaluation # 4 (T60 – 60 minutes after study drugs administration)**

Time due: dd/ mmm/ yyyy HH:MM ± 15 min

|                                                                                                                                                                                                                                                                                                                                                                                                                                                                                                                                                                                                                                                                                                                                                           |                                                                                                                                                                                                                          |
|-----------------------------------------------------------------------------------------------------------------------------------------------------------------------------------------------------------------------------------------------------------------------------------------------------------------------------------------------------------------------------------------------------------------------------------------------------------------------------------------------------------------------------------------------------------------------------------------------------------------------------------------------------------------------------------------------------------------------------------------------------------|--------------------------------------------------------------------------------------------------------------------------------------------------------------------------------------------------------------------------|
| Was this evaluation completed?                                                                                                                                                                                                                                                                                                                                                                                                                                                                                                                                                                                                                                                                                                                            | <input type="checkbox"/> Yes <input type="checkbox"/> No                                                                                                                                                                 |
| If Yes, continue. If No, specify reason:                                                                                                                                                                                                                                                                                                                                                                                                                                                                                                                                                                                                                                                                                                                  | <input type="checkbox"/> Patient discharged before specified evaluation time<br><input type="checkbox"/> Other: _____                                                                                                    |
| <u>Date and Time of evaluation # 4:</u>                                                                                                                                                                                                                                                                                                                                                                                                                                                                                                                                                                                                                                                                                                                   | ___ / ___ / ___<br>dd / mmm / yyyy<br>____ : ____<br>(24 hour clock)                                                                                                                                                     |
| <u>Vital Signs:</u>                                                                                                                                                                                                                                                                                                                                                                                                                                                                                                                                                                                                                                                                                                                                       | HR: _____ bpm<br>RR: _____ rpm<br>Sat: _____ %<br>BP: _____ / _____ mmHg                                                                                                                                                 |
| <u>Pain and Sedation Scores:</u><br><b>vNRS</b><br>"On a scale of 0 to 10, where 0 is no pain and 10 is the worst pain you can imagine, what is your pain level now?"<br><br><b>VAS</b><br>"What is your pain level on this sliding scale, where 0 means absence of pain and 100 is the worst pain you have ever experienced?"<br><br><b>FPS-R</b><br>"These faces show how much something can hurt. This face (point to left most face) shows no pain. The faces show more and more pain (point from left to right) up to this one (point to right most face) – it shows very much pain. Can you point to the face that shows how much you hurt right now?"<br>Note: say "hurt" or "pain" whichever seems right for a particular child<br><br><b>RSS</b> | _____/10<br><br>_____/100 mm<br><br><input type="checkbox"/> 0 <input type="checkbox"/> 2 <input type="checkbox"/> 4<br><input type="checkbox"/> 6 <input type="checkbox"/> 8 <input type="checkbox"/> 10<br><br>_____/6 |
| <u>Any adverse events or side effects?</u><br>If "YES", complete a separate entry for each AE on the AE Form. Do not suggest any AEs to the participant; let him/ her answer spontaneously.                                                                                                                                                                                                                                                                                                                                                                                                                                                                                                                                                               | <input type="checkbox"/> Yes – (Fill out Adverse Events Form)<br><input type="checkbox"/> No                                                                                                                             |

## A study of Non-Steroidal Or Opioid Analgesia Use for Children with Musculoskeletal Injuries: The No OUCH Trials

| REB # :            | Study ID                                                            | Enrolment Date                       |
|--------------------|---------------------------------------------------------------------|--------------------------------------|
| PI: Dr. Samina Ali | _____ - _____ - _____<br>(site - preference group - patient number) | ___ / ___ / 20___<br>dd / mmm / yyyy |

## Evaluation # 5 (T90 – 90 minutes after study drugs administration)

Time due: dd/ mmm/ yyyy HH:MM ± 15 min

|                                                                                                                                                                                                                                                                                                                                                                                                                                                                                                                                                                                                                                                                                                                                                           |                                                                                                                                                                                                                          |
|-----------------------------------------------------------------------------------------------------------------------------------------------------------------------------------------------------------------------------------------------------------------------------------------------------------------------------------------------------------------------------------------------------------------------------------------------------------------------------------------------------------------------------------------------------------------------------------------------------------------------------------------------------------------------------------------------------------------------------------------------------------|--------------------------------------------------------------------------------------------------------------------------------------------------------------------------------------------------------------------------|
| Was this evaluation completed?                                                                                                                                                                                                                                                                                                                                                                                                                                                                                                                                                                                                                                                                                                                            | <input type="checkbox"/> Yes <input type="checkbox"/> No                                                                                                                                                                 |
| If Yes, continue. If No, specify reason:                                                                                                                                                                                                                                                                                                                                                                                                                                                                                                                                                                                                                                                                                                                  | <input type="checkbox"/> Patient discharged before specified evaluation time<br><input type="checkbox"/> Other: _____                                                                                                    |
| <u>Date and Time of evaluation # 5:</u>                                                                                                                                                                                                                                                                                                                                                                                                                                                                                                                                                                                                                                                                                                                   | ___ / ___ / ___<br>dd / mmm / yyyy<br>_____<br>:_____<br>(24 hour clock)                                                                                                                                                 |
| <u>Vital Signs:</u>                                                                                                                                                                                                                                                                                                                                                                                                                                                                                                                                                                                                                                                                                                                                       | HR: _____ bpm<br>RR: _____ rpm<br>Sat: _____ %<br>BP: ____ / ____ mmHg                                                                                                                                                   |
| <u>Pain and Sedation Scores:</u><br><b>vNRS</b><br>"On a scale of 0 to 10, where 0 is no pain and 10 is the worst pain you can imagine, what is your pain level now?"<br><br><b>VAS</b><br>"What is your pain level on this sliding scale, where 0 means absence of pain and 100 is the worst pain you have ever experienced?"<br><br><b>FPS-R</b><br>"These faces show how much something can hurt. This face (point to left most face) shows no pain. The faces show more and more pain (point from left to right) up to this one (point to right most face) – it shows very much pain. Can you point to the face that shows how much you hurt right now?"<br>Note: say "hurt" or "pain" whichever seems right for a particular child<br><br><b>RSS</b> | _____/10<br><br>_____/100 mm<br><br><input type="checkbox"/> 0 <input type="checkbox"/> 2 <input type="checkbox"/> 4<br><input type="checkbox"/> 6 <input type="checkbox"/> 8 <input type="checkbox"/> 10<br><br>_____/6 |
| <u>Any adverse events or side effects?</u><br>If "YES", complete a separate entry for each AE on the AE Form. Do not suggest any AEs to the participant; let him/ her answer spontaneously.                                                                                                                                                                                                                                                                                                                                                                                                                                                                                                                                                               | <input type="checkbox"/> Yes – (Fill out Adverse Events Form)<br><input type="checkbox"/> No                                                                                                                             |

A study of Non-Steroidal Or Opioid Analgesia Use for Children with Musculoskeletal Injuries: The No OUCH Trials

| REB # :            | Study ID                                                         | Enrolment Date                       |
|--------------------|------------------------------------------------------------------|--------------------------------------|
| PI: Dr. Samina Ali | ____ - ____ - ____<br>(site - preference group - patient number) | ___ / ___ / 20___<br>dd / mmm / yyyy |

**Evaluation # 6 (T120 – 120 minutes after study drugs administration)**

Time due: dd/ mmm/ yyyy HH:MM ± 15 min

|                                                                                                                                                                                                                                                                                                                                                                                                                                                                                                                                                                                                                                                                                                                                                           |                                                                                                                                                                                                                          |
|-----------------------------------------------------------------------------------------------------------------------------------------------------------------------------------------------------------------------------------------------------------------------------------------------------------------------------------------------------------------------------------------------------------------------------------------------------------------------------------------------------------------------------------------------------------------------------------------------------------------------------------------------------------------------------------------------------------------------------------------------------------|--------------------------------------------------------------------------------------------------------------------------------------------------------------------------------------------------------------------------|
| Was this evaluation completed?                                                                                                                                                                                                                                                                                                                                                                                                                                                                                                                                                                                                                                                                                                                            | <input type="checkbox"/> Yes <input type="checkbox"/> No                                                                                                                                                                 |
| If Yes, continue. If No, specify reason:                                                                                                                                                                                                                                                                                                                                                                                                                                                                                                                                                                                                                                                                                                                  | <input type="checkbox"/> Patient discharged before specified evaluation time<br><input type="checkbox"/> Other: _____                                                                                                    |
| <u>Date and Time of evaluation # 6:</u>                                                                                                                                                                                                                                                                                                                                                                                                                                                                                                                                                                                                                                                                                                                   | ___ / ___ / ___<br>dd mmm yyyy<br>_____<br>:(24 hour clock)                                                                                                                                                              |
| <u>Vital Signs:</u>                                                                                                                                                                                                                                                                                                                                                                                                                                                                                                                                                                                                                                                                                                                                       | HR: _____ bpm<br>RR: _____ rpm<br>Sat: _____ %<br>BP: ____ / ____ mmHg                                                                                                                                                   |
| <u>Pain and Sedation Scores:</u><br><b>vNRS</b><br>"On a scale of 0 to 10, where 0 is no pain and 10 is the worst pain you can imagine, what is your pain level now?"<br><br><b>VAS</b><br>"What is your pain level on this sliding scale, where 0 means absence of pain and 100 is the worst pain you have ever experienced?"<br><br><b>FPS-R</b><br>"These faces show how much something can hurt. This face (point to left most face) shows no pain. The faces show more and more pain (point from left to right) up to this one (point to right most face) – it shows very much pain. Can you point to the face that shows how much you hurt right now?"<br>Note: say "hurt" or "pain" whichever seems right for a particular child<br><br><b>RSS</b> | _____/10<br><br>_____/100 mm<br><br><input type="checkbox"/> 0 <input type="checkbox"/> 2 <input type="checkbox"/> 4<br><input type="checkbox"/> 6 <input type="checkbox"/> 8 <input type="checkbox"/> 10<br><br>_____/6 |
| <u>Any adverse events or side effects?</u><br>If "YES", complete a separate entry for each AE on the AE Form. Do not suggest any AEs to the participant; let him/ her answer spontaneously.                                                                                                                                                                                                                                                                                                                                                                                                                                                                                                                                                               | <input type="checkbox"/> Yes – (Fill out Adverse Events Form)<br><input type="checkbox"/> No                                                                                                                             |

## A study of Non-Steroidal Or Opioid Analgesia Use for Children with Musculoskeletal Injuries: The No OUCH Trials

| REB # :            | Study ID                                                            | Enrolment Date                       |
|--------------------|---------------------------------------------------------------------|--------------------------------------|
| PI: Dr. Samina Ali | _____ - _____ - _____<br>(site - preference group - patient number) | ___ / ___ / 20___<br>dd / mmm / yyyy |

## Evaluation # 7 (TME, Time of Medical Examination)

|                                                                                                                                                                                                                                                                                                                                                                                                                                                                                                                                                                                                                                                                                                                                               |                                                                                                                                                                                                              |
|-----------------------------------------------------------------------------------------------------------------------------------------------------------------------------------------------------------------------------------------------------------------------------------------------------------------------------------------------------------------------------------------------------------------------------------------------------------------------------------------------------------------------------------------------------------------------------------------------------------------------------------------------------------------------------------------------------------------------------------------------|--------------------------------------------------------------------------------------------------------------------------------------------------------------------------------------------------------------|
| Was this evaluation completed?                                                                                                                                                                                                                                                                                                                                                                                                                                                                                                                                                                                                                                                                                                                | <input type="checkbox"/> Yes <input type="checkbox"/> No                                                                                                                                                     |
| If Yes, continue. If No, specify reason:                                                                                                                                                                                                                                                                                                                                                                                                                                                                                                                                                                                                                                                                                                      |                                                                                                                                                                                                              |
| <u>Date and Time of medical exam:</u>                                                                                                                                                                                                                                                                                                                                                                                                                                                                                                                                                                                                                                                                                                         | ___ / ___ / ___<br>dd / mmm / yyyy<br>____ : ____<br>(24 hour clock)                                                                                                                                         |
| <u>Vital Signs:</u>                                                                                                                                                                                                                                                                                                                                                                                                                                                                                                                                                                                                                                                                                                                           | HR: _____ bpm<br>RR: _____ rpm<br>Sat: _____ %<br>BP: _____ / _____ mmHg                                                                                                                                     |
| <u>Pain and Sedation Scores:</u><br><b>vNRS</b><br>"On a scale of 0 to 10, where 0 is no pain and 10 is the worst pain you can imagine, what is your pain level now?"<br><b>VAS</b><br>"What is your pain level on this sliding scale, where 0 means absence of pain and 100 is the worst pain you have ever experienced?"<br><b>FPS-R</b><br>"These faces show how much something can hurt. This face (point to left most face) shows no pain. The faces show more and more pain (point from left to right) up to this one (point to right most face) – it shows very much pain. Can you point to the face that shows how much you hurt right now?"<br>Note: say "hurt" or "pain" whichever seems right for a particular child<br><b>RSS</b> | _____/10<br>_____/100 mm<br><input type="checkbox"/> 0 <input type="checkbox"/> 2 <input type="checkbox"/> 4<br><input type="checkbox"/> 6 <input type="checkbox"/> 8 <input type="checkbox"/> 10<br>_____/6 |
| <u>Any adverse events or side effects?</u><br>If "YES", complete a separate entry for each AE on the AE Form. Do not suggest any AEs to the participant; let him/ her answer spontaneously.                                                                                                                                                                                                                                                                                                                                                                                                                                                                                                                                                   | <input type="checkbox"/> Yes – (Fill out Adverse Events Form)<br><input type="checkbox"/> No                                                                                                                 |

A study of Non-Steroidal Or Opioid Analgesia Use for Children with Musculoskeletal Injuries: The No OUCH Trials

| REB # :            | Study ID                                                         | Enrolment Date                    |
|--------------------|------------------------------------------------------------------|-----------------------------------|
| PI: Dr. Samina Ali | ____ - ____ - ____<br>(site - preference group - patient number) | __ / __ / 20__<br>dd / mmm / yyyy |

**Evaluation # 8 (TXR – Time following X-Ray procedure +/- 30 minutes)**

|                                                                                                                                                                                                                                                                                                                                                                                                   |                                                                                                                                                                       |
|---------------------------------------------------------------------------------------------------------------------------------------------------------------------------------------------------------------------------------------------------------------------------------------------------------------------------------------------------------------------------------------------------|-----------------------------------------------------------------------------------------------------------------------------------------------------------------------|
| Did the patient have an X-ray?                                                                                                                                                                                                                                                                                                                                                                    | <input type="checkbox"/> Yes <input type="checkbox"/> No                                                                                                              |
| If Yes, Was the post- X-ray evaluation completed?                                                                                                                                                                                                                                                                                                                                                 | <input type="checkbox"/> Yes <input type="checkbox"/> No                                                                                                              |
| If Yes, continue. If No, specify reason:                                                                                                                                                                                                                                                                                                                                                          |                                                                                                                                                                       |
| <u>Date and Time of X-ray:</u>                                                                                                                                                                                                                                                                                                                                                                    | ____ / ____ / ____<br>dd / mmm / yyyy<br>____ : ____<br>(24 hour clock)                                                                                               |
| <u>Date and Time of evaluation # 8:</u>                                                                                                                                                                                                                                                                                                                                                           | ____ / ____ / ____<br>dd / mmm / yyyy<br>____ : ____<br>(24 hour clock)                                                                                               |
| <u>Vital Signs:</u>                                                                                                                                                                                                                                                                                                                                                                               | HR: _____ bpm<br>RR: _____ rpm<br>Sat: _____ %<br>BP: _____ / _____ mmHg                                                                                              |
| <u>Pain and Sedation Scores:</u>                                                                                                                                                                                                                                                                                                                                                                  |                                                                                                                                                                       |
| <b>vNRS</b><br>"On a scale of 0 to 10, where 0 is no pain and 10 is the worst pain you can imagine, what is your pain level now?"                                                                                                                                                                                                                                                                 | _____/10                                                                                                                                                              |
| <b>VAS</b><br>"What is your pain level on this sliding scale, where 0 means absence of pain and 100 is the worst pain you have ever experienced?"                                                                                                                                                                                                                                                 | _____/100 mm                                                                                                                                                          |
| <b>FPS-R</b><br>"These faces show how much something can hurt. This face (point to left most face) shows no pain. The faces show more and more pain (point from left to right) up to this one (point to right most face) – it shows very much pain. Can you point to the face that shows how much you hurt right now?"<br>Note: say "hurt" or "pain" whichever seems right for a particular child | <input type="checkbox"/> 0 <input type="checkbox"/> 2 <input type="checkbox"/> 4<br><input type="checkbox"/> 6 <input type="checkbox"/> 8 <input type="checkbox"/> 10 |
| <b>RSS</b>                                                                                                                                                                                                                                                                                                                                                                                        | _____/6                                                                                                                                                               |

**A study of Non-Steroidal Or Opioid Analgesia Use for Children with Musculoskeletal Injuries: The No OUCH Trials**

| REB # :            | Study ID                                                         | Enrolment Date                       |
|--------------------|------------------------------------------------------------------|--------------------------------------|
| PI: Dr. Samina Ali | ____ - ____ - ____<br>(site - preference group - patient number) | ___ / ___ / 20___<br>dd / mmm / yyyy |

**Any adverse events or side effects?**

*If "YES", complete a separate entry for each AE on the AE Form. Do not suggest any AEs to the participant; let him/ her answer spontaneously.*

Yes – (Fill out Adverse Events Form)

No

For peer review only

A study of Non-Steroidal Or Opioid Analgesia Use for Children with Musculoskeletal Injuries: The No OUCH Trials

| REB # :            | Study ID                                                         | Enrolment Date                    |
|--------------------|------------------------------------------------------------------|-----------------------------------|
| PI: Dr. Samina Ali | ____ - ____ - ____<br>(site - preference group - patient number) | __ / __ / 20__<br>dd / mmm / yyyy |

**ED Discharge Evaluation**

| <b>ED Discharge Evaluation (To be done <u>only</u> if discharged before 120 minutes)</b>                                                                                                                                                                                                                                                                                                          |                                                                                                                                                                       |
|---------------------------------------------------------------------------------------------------------------------------------------------------------------------------------------------------------------------------------------------------------------------------------------------------------------------------------------------------------------------------------------------------|-----------------------------------------------------------------------------------------------------------------------------------------------------------------------|
| Was the patient discharged before 120 minutes?                                                                                                                                                                                                                                                                                                                                                    | <input type="checkbox"/> Yes <input type="checkbox"/> No                                                                                                              |
| If Yes, Was this evaluation completed?                                                                                                                                                                                                                                                                                                                                                            | <input type="checkbox"/> Yes <input type="checkbox"/> No                                                                                                              |
| If Yes, continue. If No, specify reason:                                                                                                                                                                                                                                                                                                                                                          |                                                                                                                                                                       |
| <u>Date and Time of ED Discharge:</u>                                                                                                                                                                                                                                                                                                                                                             | ____ / ____ / ____<br>dd mmm yyyy<br>____ : ____<br>(24 hour clock)                                                                                                   |
| <u>Vital Signs:</u>                                                                                                                                                                                                                                                                                                                                                                               | HR: _____ bpm<br>RR: _____ rpm<br>Sat: _____ %<br>BP: ____ / ____ mmHg                                                                                                |
| <u>Pain and Sedation Scores:</u>                                                                                                                                                                                                                                                                                                                                                                  |                                                                                                                                                                       |
| <b>vNRS</b><br>"On a scale of 0 to 10, where 0 is no pain and 10 is the worst pain you can imagine, what is your pain level now?"                                                                                                                                                                                                                                                                 | _____/10                                                                                                                                                              |
| <b>VAS</b><br>"What is your pain level on this sliding scale, where 0 means absence of pain and 100 is the worst pain you have ever experienced?"                                                                                                                                                                                                                                                 | _____/100 mm                                                                                                                                                          |
| <b>FPS-R</b><br>"These faces show how much something can hurt. This face (point to left most face) shows no pain. The faces show more and more pain (point from left to right) up to this one (point to right most face) – it shows very much pain. Can you point to the face that shows how much you hurt right now?"<br>Note: say "hurt" or "pain" whichever seems right for a particular child | <input type="checkbox"/> 0 <input type="checkbox"/> 2 <input type="checkbox"/> 4<br><input type="checkbox"/> 6 <input type="checkbox"/> 8 <input type="checkbox"/> 10 |
| <b>RSS</b>                                                                                                                                                                                                                                                                                                                                                                                        | _____/6                                                                                                                                                               |
| <u>Any adverse events or side effects?</u><br>If "YES", complete a separate entry for each AE on the AE Form. Do not suggest any AEs to the participant; let him/ her answer spontaneously.                                                                                                                                                                                                       | <input type="checkbox"/> Yes – (Fill out Adverse Events Form)<br><input type="checkbox"/> No                                                                          |

**A study of Non-Steroidal Or Opioid Analgesia Use for Children with Musculoskeletal Injuries: The No OUCH Trials**

| REB # :            | Study ID                                                            | Enrolment Date                       |
|--------------------|---------------------------------------------------------------------|--------------------------------------|
| PI: Dr. Samina Ali | _____ - _____ - _____<br>(site - preference group - patient number) | ___ / ___ / 20___<br>dd / mmm / yyyy |

|                               |                                                                                                                                                                                                                                                                                     |
|-------------------------------|-------------------------------------------------------------------------------------------------------------------------------------------------------------------------------------------------------------------------------------------------------------------------------------|
| Reason for early termination? | <input type="checkbox"/> Procedural sedation used for a reduction*<br><input type="checkbox"/> Left ED prior to evaluation<br><input type="checkbox"/> Left without being seen<br><input type="checkbox"/> Other, please specify<br>_____<br>* Fill out Concomitant Medication Form |
|-------------------------------|-------------------------------------------------------------------------------------------------------------------------------------------------------------------------------------------------------------------------------------------------------------------------------------|

For peer review only



**A study of Non-Steroidal Or Opioid Analgesia Use for Children with Musculoskeletal Injuries: The No OUCH Trials**

| REB # :            | Study ID                                                         | Enrolment Date                    |
|--------------------|------------------------------------------------------------------|-----------------------------------|
| PI: Dr. Samina Ali | ____ - ____ - ____<br>(site - preference group - patient number) | __ / __ / 20__<br>dd / mmm / yyyy |

**PRE-Discharge Questions**

| Question for Research Nurse                                                          |                                                                                                                                                            |
|--------------------------------------------------------------------------------------|------------------------------------------------------------------------------------------------------------------------------------------------------------|
| Which drug, or combination of drugs, do you think the child received for this study? | <input type="checkbox"/> Ibuprofen alone or<br><input type="checkbox"/> Ibuprofen + Acetaminophen or<br><input type="checkbox"/> Ibuprofen + Hydromorphone |

| Questions for Parent/ Caregiver                                                                                    |                                                                                                                                                                                                                            |
|--------------------------------------------------------------------------------------------------------------------|----------------------------------------------------------------------------------------------------------------------------------------------------------------------------------------------------------------------------|
| Which drug, or combination of drugs, do you (parent/ caregiver) think your child received for this study?          | <input type="checkbox"/> Ibuprofen alone or<br><input type="checkbox"/> Ibuprofen + Acetaminophen or<br><input type="checkbox"/> Ibuprofen + Hydromorphone                                                                 |
| How do you feel about the pain treatment provided by the study medicine today?                                     | <input type="checkbox"/> Very Satisfied<br><input type="checkbox"/> Somewhat Satisfied<br><input type="checkbox"/> Neutral<br><input type="checkbox"/> Somewhat dissatisfied<br><input type="checkbox"/> Very dissatisfied |
| Do you feel that that the medicines that your child received provided adequate/ enough pain relief for your child? | <input type="checkbox"/> Yes<br><input type="checkbox"/> No<br><input type="checkbox"/> Unsure                                                                                                                             |
| Would you accept the same medicine for your child, in the unlikely event of a similar injury in the future?        | <input type="checkbox"/> Yes<br><input type="checkbox"/> No<br><input type="checkbox"/> Unsure                                                                                                                             |
| Why? Why Not?                                                                                                      | Free Text                                                                                                                                                                                                                  |

| Questions for Child                                                       |                                                                                                                                                                                                  |
|---------------------------------------------------------------------------|--------------------------------------------------------------------------------------------------------------------------------------------------------------------------------------------------|
| How happy were you with the pain treatment from the study medicine today? | <input type="checkbox"/> Very happy<br><input type="checkbox"/> Somewhat happy<br><input type="checkbox"/> Neutral<br><input type="checkbox"/> Somewhat sad<br><input type="checkbox"/> Very sad |
| Would you take the same medicine if you had the same injury again?        | <input type="checkbox"/> Yes<br><input type="checkbox"/> No                                                                                                                                      |

**A study of Non-Steroidal Or Opioid Analgesia Use for Children with Musculoskeletal Injuries: The No OUCH Trials**

| REB # :            | Study ID                                                            | Enrolment Date                       |
|--------------------|---------------------------------------------------------------------|--------------------------------------|
| PI: Dr. Samina Ali | _____ - _____ - _____<br>(site - preference group - patient number) | ___ / ___ / 20___<br>dd / mmm / yyyy |

|               |                                 |
|---------------|---------------------------------|
|               | <input type="checkbox"/> Unsure |
| Why? Why Not? | Free Text                       |

For peer review only

1  
2  
3  
4  
5  
6  
7  
8  
9  
10  
11  
12  
13  
14  
15  
16  
17  
18  
19  
20  
21  
22  
23  
24  
25  
26  
27  
28  
29  
30  
31  
32  
33  
34  
35  
36  
37  
38  
39  
40  
41  
42  
43  
44  
45  
46  
47  
48  
49  
50  
51  
52  
53  
54  
55  
56  
57  
58  
59  
60

A study of Non-Steroidal Or Opioid Analgesia Use for Children with Musculoskeletal Injuries: The No OUCH Trials

|                    |                                                                  |                                   |
|--------------------|------------------------------------------------------------------|-----------------------------------|
| <b>REB # :</b>     | <b>Study ID</b>                                                  | <b>Enrolment Date</b>             |
| PI: Dr. Samina Ali | ____ - ____ - ____<br>(site - preference group - patient number) | __ / __ / 20__<br>dd / mmm / yyyy |

**POST-Discharge Questions**

| Questions for Treating ED Physician                     |                                                                                                                                                                                                              |
|---------------------------------------------------------|--------------------------------------------------------------------------------------------------------------------------------------------------------------------------------------------------------------|
| Which drug(s) would you have chosen to give this child? | <input type="checkbox"/> Ibuprofen alone or<br><input type="checkbox"/> Ibuprofen + Acetaminophen or<br><input type="checkbox"/> Ibuprofen + Hydromorphone<br><input type="checkbox"/> other, please specify |
| Which drug(s) do you think that the child received?     | <input type="checkbox"/> Ibuprofen alone or<br><input type="checkbox"/> Ibuprofen + Acetaminophen or<br><input type="checkbox"/> Ibuprofen + Hydromorphone                                                   |

| Unblinding                                   |                                                                              |
|----------------------------------------------|------------------------------------------------------------------------------|
| Was the study unblinded during the ED visit? | <input type="checkbox"/> Yes, please explain.<br><input type="checkbox"/> No |

| Co-Interventions                                   |                                                          |                                                          |                             |
|----------------------------------------------------|----------------------------------------------------------|----------------------------------------------------------|-----------------------------|
| Were any interventions done during the ED visit?   |                                                          | <input type="checkbox"/> Yes*                            | <input type="checkbox"/> No |
| <i>* If "YES", please fill out the table below</i> |                                                          |                                                          |                             |
| Intervention                                       | Administered?                                            | Date and Time of Administration<br>(dd/ mmm/ yyyy HH:MM) | Comments                    |
| Reduction of the fracture?                         | <input type="checkbox"/> Yes <input type="checkbox"/> No |                                                          |                             |
| Splint?                                            | <input type="checkbox"/> Yes <input type="checkbox"/> No |                                                          |                             |
| Cast?                                              | <input type="checkbox"/> Yes <input type="checkbox"/> No |                                                          |                             |
| Ice?                                               | <input type="checkbox"/> Yes <input type="checkbox"/> No |                                                          |                             |
| Distraction?                                       | <input type="checkbox"/> Yes <input type="checkbox"/> No |                                                          |                             |
| Other? Please specify:<br>_____                    | <input type="checkbox"/> Yes <input type="checkbox"/> No |                                                          |                             |

**If a procedural sedation or a medication has been administered, please fill out the Concomitant Medication Form.**

A study of Non-Steroidal Or Opioid Analgesia Use for Children with Musculoskeletal Injuries: The No OUCH Trials

| REB # :            | Study ID                                                         | Enrolment Date                |
|--------------------|------------------------------------------------------------------|-------------------------------|
| PI: Dr. Samina Ali | ____ - ____ - ____<br>(site - preference group - patient number) | __ / __ / 20__<br>dd mmm yyyy |

| Discharge Details                                                                           |                                                                                                                        |
|---------------------------------------------------------------------------------------------|------------------------------------------------------------------------------------------------------------------------|
| Discharge Disposition                                                                       | <input type="checkbox"/> Discharged Home<br><input type="checkbox"/> Admitted<br><input type="checkbox"/> Other, _____ |
| Date and Time of Discharge                                                                  | ____ / ____ / ____<br>dd mmm yyyy<br>____ : ____<br>(24 hour clock)                                                    |
| Length of Stay in ED (calculated field):                                                    | _____ (hours, to one decimal place)                                                                                    |
| Final diagnosis at discharge (per MD):                                                      |                                                                                                                        |
| Radiologic Exams:                                                                           | <input type="checkbox"/> Yes<br><input type="checkbox"/> No                                                            |
| If yes, Date and Time of Radiologic Exam:                                                   | ____ / ____ / ____<br>dd mmm yyyy<br>____ : ____<br>(24 hour clock)                                                    |
| Final diagnosis from radiologist's report:<br>(From chart or electronic health care system) |                                                                                                                        |



**A study of Non-Steroidal Or Opioid Analgesia Use for Children with Musculoskeletal Injuries: The No OUCH Trials**

| REB # :            | Study ID                                                         | Enrolment Date                       |
|--------------------|------------------------------------------------------------------|--------------------------------------|
| PI: Dr. Samina Ali | ____ - ____ - ____<br>(site - preference group - patient number) | ___ / ___ / 20___<br>dd / mmm / yyyy |

**24 Hour Follow-up Survey**

**Adverse Effects and Side Effects**

After you were discharged from the emergency department, has your child experienced any adverse (bad) effects or side effects that you think are related to the pain medicines they got in the study?

Yes

No

If YES, please explain:

**Medication Uses**

After you were discharged from the emergency department, has your child taken any other medicines?

Yes

No

If YES, please specify:

**Home Pain Assessment**

Please rate your child's **overall** (average) pain experience in the last 24 hours, on a scale from 0-10, where 0=no pain and 10=the worst pain imaginable.

\_\_\_\_\_/10

Please rate your child's **worst** pain experienced in the last 24 hours, on a scale from 0-10, where 0=no pain and 10= the worst pain imaginable.

\_\_\_\_\_/10

**Pain Related Function**

Did your child whine or complain more than usual in the last 24 hours?

Yes  No

Did your child play less than usual in the last 24 hours?

Yes  No

Did your child do the things they normally do in the last 24 hours?

Yes  No

Did your child act more quiet than usual in the last 24 hours?

Yes  No

Did your child have less energy than usual in the last 24 hours?

Yes  No

Did your child eat less than usual in the last 24 hours?

Yes  No

Did your child sleep less than usual in the last 24 hours?

Yes  No

**A study of Non-Steroidal Or Opioid Analgesia Use for Children with Musculoskeletal Injuries: The No OUCH Trials**

| REB # :            | Study ID                                                         | Enrolment Date                    |
|--------------------|------------------------------------------------------------------|-----------------------------------|
| PI: Dr. Samina Ali | ____ - ____ - ____<br>(site - preference group - patient number) | __ / __ / 20__<br>dd / mmm / yyyy |

|                                                                              |                                                          |
|------------------------------------------------------------------------------|----------------------------------------------------------|
| Did your child hold the sore part of the body in the last 24 hours?          | <input type="checkbox"/> Yes <input type="checkbox"/> No |
| Did your child moan or groan more than usual in the last 24 hours?           | <input type="checkbox"/> Yes <input type="checkbox"/> No |
| Did your child want to be close to you more than usual in the last 24 hours? | <input type="checkbox"/> Yes <input type="checkbox"/> No |
| <b>Total PPPM Score (Automatic Calculation – Hidden Field) = 0 - 10</b>      |                                                          |

| Activity Score                                               |                                                                                                                                        |
|--------------------------------------------------------------|----------------------------------------------------------------------------------------------------------------------------------------|
| Rate your child's ability to perform their usual activities: | <input type="checkbox"/> A No limitation<br><input type="checkbox"/> B Mild limitation<br><input type="checkbox"/> C Severe limitation |

| At-Home Treatments                                                                     |                                                          |
|----------------------------------------------------------------------------------------|----------------------------------------------------------|
| Did your child use any of the following in the last 24 hours to help treat their pain? |                                                          |
| Ice?                                                                                   | <input type="checkbox"/> Yes <input type="checkbox"/> No |
| Elevation (raising their sore body part)?                                              | <input type="checkbox"/> Yes <input type="checkbox"/> No |
| Distraction (such as iPad, movies, games)?                                             | <input type="checkbox"/> Yes <input type="checkbox"/> No |
| Please describe any other things that your child used to help treat the pain.          | Free text                                                |

| Missed School and Work                                       |                                                          |
|--------------------------------------------------------------|----------------------------------------------------------|
| Did your child miss school and/or work in the last 24 hours? | <input type="checkbox"/> Yes <input type="checkbox"/> No |
| Did YOU (caregiver/parent) miss work in the last 24 hours?   | <input type="checkbox"/> Yes <input type="checkbox"/> No |

| What Did Your Child Receive?                                                                                                                                                                                                                                                      |
|-----------------------------------------------------------------------------------------------------------------------------------------------------------------------------------------------------------------------------------------------------------------------------------|
| <p>"We would like to let you know that your child received the following as their study drugs:<br/>           [Advil only OR Advil and Tylenol OR Advil and Dilaudid].<br/>           We will ask you about your thoughts in this when we email/ call you again in one week."</p> |

|                                                                                                                                                                                                                                                                                   |
|-----------------------------------------------------------------------------------------------------------------------------------------------------------------------------------------------------------------------------------------------------------------------------------|
| <u>Do you have any other comments or concerns?</u>                                                                                                                                                                                                                                |
| <p>Thank you for completing this follow-up survey, we appreciate your participation in the No OUCH study!<br/>           Without families like you, our research would not be possible. Your next (and last) follow-up survey will be<br/>           in approximately 1 week.</p> |

## A study of Non-Steroidal Or Opioid Analgesia Use for Children with Musculoskeletal Injuries: The No OUCH Trials

|                    |                                                                  |                                     |
|--------------------|------------------------------------------------------------------|-------------------------------------|
| <b>REB # :</b>     | <b>Study ID</b>                                                  | <b>Enrolment Date</b>               |
| PI: Dr. Samina Ali | ____ - ____ - ____<br>(site - preference group - patient number) | ____ / ____ / 20____<br>dd mmm yyyy |

**Follow-up Survey # 2 (1-2 weeks after discharge)***Call must be done in this time window*1 week from discharge: Date: \_\_\_\_ / \_\_\_\_ / \_\_\_\_  
dd mmm yyyy2 weeks from discharge: Date: \_\_\_\_ / \_\_\_\_ / \_\_\_\_  
dd mmm yyyy**Follow-up Call Attempts:**Number of call attempts made:  1  2  3  4  5  
 N/A – completed via email

|                  | <b>Date and Time</b><br>(dd/ mmm/ yyyy HH:MM) | <b>RA Initials</b> | <b>Comments</b> |
|------------------|-----------------------------------------------|--------------------|-----------------|
| <b>Call # 1:</b> | ____ / ____ / ____ : ____                     |                    |                 |
| <b>Call # 2:</b> | ____ / ____ / ____ : ____                     |                    |                 |
| <b>Call # 3:</b> | ____ / ____ / ____ : ____                     |                    |                 |
| <b>Call # 4:</b> | ____ / ____ / ____ : ____                     |                    |                 |
| <b>Call # 5:</b> | ____ / ____ / ____ : ____                     |                    |                 |

1 week Follow-up completed?:  Yes  No (Lost to follow-up)

If YES, Continue...



**A study of Non-Steroidal Or Opioid Analgesia Use for Children with Musculoskeletal Injuries: The No OUCH Trials**

| REB # :            | Study ID                                                         | Enrolment Date                    |
|--------------------|------------------------------------------------------------------|-----------------------------------|
| PI: Dr. Samina Ali | ____ - ____ - ____<br>(site - preference group - patient number) | __ / __ / 20__<br>dd / mmm / yyyy |

**1-2 Week Follow-up Survey**

| <b>Parent / Caregiver Satisfaction and Comfort Measures</b>                                                                                                                                                                             |                                                                                                                                                                                                                            |
|-----------------------------------------------------------------------------------------------------------------------------------------------------------------------------------------------------------------------------------------|----------------------------------------------------------------------------------------------------------------------------------------------------------------------------------------------------------------------------|
| <p>As you might remember, your child received _XXX_ in the emergency department, as part of this study.</p> <p>Did knowing what pain medicine(s) your child received in the study affect how you treated your child's pain at home?</p> | <input type="checkbox"/> Yes<br><input type="checkbox"/> No<br><input type="checkbox"/> Unsure                                                                                                                             |
| Please explain:                                                                                                                                                                                                                         | Free text                                                                                                                                                                                                                  |
| <p>How do you feel about the pain treatment provided by the medicines your child was given in the emergency department, as part of this study?</p>                                                                                      | <input type="checkbox"/> Very Satisfied<br><input type="checkbox"/> Somewhat Satisfied<br><input type="checkbox"/> Neutral<br><input type="checkbox"/> Somewhat dissatisfied<br><input type="checkbox"/> Very dissatisfied |
| Please explain:                                                                                                                                                                                                                         | Free text                                                                                                                                                                                                                  |
| <p>Do you feel that that the medicines that your child received in the emergency department, as part of this study provided adequate/ enough pain relief for your child?</p>                                                            | <input type="checkbox"/> Yes<br><input type="checkbox"/> No<br><input type="checkbox"/> Unsure                                                                                                                             |
| Please explain:                                                                                                                                                                                                                         | Free text                                                                                                                                                                                                                  |
| <p>Would you accept the same medicine for your child, in the unlikely event of a similar injury in the future?</p>                                                                                                                      | <input type="checkbox"/> Yes<br><input type="checkbox"/> No<br><input type="checkbox"/> Unsure                                                                                                                             |
| Please explain:                                                                                                                                                                                                                         | Free text                                                                                                                                                                                                                  |

**A study of Non-Steroidal Or Opioid Analgesia Use for Children with Musculoskeletal Injuries: The No OUCH Trials**

| REB # :            | Study ID                                                            | Enrolment Date                       |
|--------------------|---------------------------------------------------------------------|--------------------------------------|
| PI: Dr. Samina Ali | _____ - _____ - _____<br>(site - preference group - patient number) | ___ / ___ / 20___<br>dd / mmm / yyyy |

**Since visiting the emergency department, has your child had contact with any of the following health services for any reason related to their injury:**

|                                                                                                                                                                                                  |                                                                                      |
|--------------------------------------------------------------------------------------------------------------------------------------------------------------------------------------------------|--------------------------------------------------------------------------------------|
| A. Family Doctor / General Practitioner?<br>If YES, how many times?                                                                                                                              | <input type="checkbox"/> Yes <input type="checkbox"/> No<br>_____ times              |
| B. Orthopedic Specialist?<br>If YES, how many times?                                                                                                                                             | <input type="checkbox"/> Yes <input type="checkbox"/> No<br>_____ times              |
| C. Revisit to Emergency Department?<br>If YES, how many times?                                                                                                                                   | <input type="checkbox"/> Yes <input type="checkbox"/> No<br>_____ times              |
| D. Other Health Professional (e.g. physiotherapist, chiropractor, naturopath, rehabilitation professional, etc)?<br>If YES, please specify which kind of professional<br>If YES, how many times? | <input type="checkbox"/> Yes <input type="checkbox"/> No<br>Open text<br>_____ times |

**For any health care visits related to this injury (including your original visit to the emergency department), has your family:**

|                                                                                                                                                                                                                  |                                                                                                                                                           |
|------------------------------------------------------------------------------------------------------------------------------------------------------------------------------------------------------------------|-----------------------------------------------------------------------------------------------------------------------------------------------------------|
| A. Driven yourself or been given a lift in someone else's car?<br>If YES, how many times?<br>If YES, estimated total cost of gas<br>If YES, did you use paid parking?<br>If YES, estimated total cost of parking | <input type="checkbox"/> Yes <input type="checkbox"/> No<br>_____ times<br>_____\$<br><input type="checkbox"/> Yes <input type="checkbox"/> No<br>_____\$ |
| B. Used Public Transport (e.g. bus, subway)?<br>If YES, how many times?<br>If YES, estimated total cost of using public transportation                                                                           | <input type="checkbox"/> Yes <input type="checkbox"/> No<br>_____ times<br>_____\$                                                                        |
| C. Used Taxi/Uber rides?<br>If YES, how many times?<br>If YES, estimated total cost of using this service                                                                                                        | <input type="checkbox"/> Yes <input type="checkbox"/> No<br>_____ times<br>_____\$                                                                        |

A study of Non-Steroidal Or Opioid Analgesia Use for Children with Musculoskeletal Injuries: The No OUCH Trials

| REB # :            | Study ID                                                         | Enrolment Date                       |
|--------------------|------------------------------------------------------------------|--------------------------------------|
| PI: Dr. Samina Ali | ____ - ____ - ____<br>(site - preference group - patient number) | ___ / ___ / 20___<br>dd / mmm / yyyy |

| Additional Childcare Expenses                                                                                                                                                     |                                                                                     |
|-----------------------------------------------------------------------------------------------------------------------------------------------------------------------------------|-------------------------------------------------------------------------------------|
| A. Have you needed extra childcare for ANY of your children because of this injury (e.g. emergency department visit, other healthcare visits, child unable to go to school, etc)? | <input type="checkbox"/> Yes <input type="checkbox"/> No                            |
| B. If YES, was it extra <b>unpaid</b> childcare (i.e. grandparents, neighbours)<br>If YES, how many hours?                                                                        | <input type="checkbox"/> Yes <input type="checkbox"/> No<br>_____ hours             |
| C. If YES, was it extra <b>paid</b> childcare (i.e. babysitter, daycare)?<br>If YES, how many hours?<br>If YES, estimated total cost of for extra paid childcare                  | <input type="checkbox"/> Yes <input type="checkbox"/> No<br>_____ hours<br>_____ \$ |

| Since your emergency department visit ~1 week ago:                                                                                                                          |                      |
|-----------------------------------------------------------------------------------------------------------------------------------------------------------------------------|----------------------|
| How many days in total did your child use a pain medication, for injury-related pain?                                                                                       | _____ days           |
| How many days in total did your child miss school and/ or work?                                                                                                             | _____ days           |
| How many days in total did your child not eat properly?                                                                                                                     | _____ days           |
| How many nights in total did your child have disrupted/upset sleep?                                                                                                         | _____ nights         |
| How many days in total was your child unable to participate in their usual activities?                                                                                      | _____ days           |
| How many days in total did YOU (or another caregiver) have to miss work from paid employment because of your child's injury?                                                | _____ days           |
| On a scale of 0 to 10 (where 0 means not at all affected and 10 means extremely affected), how much did this injury affect <u>your child's</u> quality of life?             | 0-10 numerical value |
| On a scale of 0 to 10 (where 0 means not at all affected and 10 means extremely affected), how much did this injury affect <u>your</u> quality of life?                     | 0-10 numerical value |
| <u>Do you have any additional comments or concerns about how this injury and the pain medicines that you used affected you or your child's quality of life?</u>             |                      |
| Thank you for completing this final follow-up survey, we appreciate your participation in the No OUCH study! Without families like you, our research would not be possible. |                      |



Two Randomized Controlled Trials of Non-Steroidal Or Opioid Analgesia Use for Children with Musculoskeletal Injuries: The No OUCH Study

|                    |                                                                     |                                      |
|--------------------|---------------------------------------------------------------------|--------------------------------------|
| REB # :            | Study ID                                                            | Enrolment Date                       |
| PI: Dr. Samina Ali | _____ - _____ - _____<br>(site - preference group - patient number) | ___ / ___ / 20___<br>dd / mmm / yyyy |

**ADVERSE EVENTS FORM**

| To be filled out by Research Nurse |                             |                            |                                       |                                                                                                     |                       |                                                | To be filled out by Site Investigator                                                                                          |                                                                                               |                                          |                                                                                                   |                 |
|------------------------------------|-----------------------------|----------------------------|---------------------------------------|-----------------------------------------------------------------------------------------------------|-----------------------|------------------------------------------------|--------------------------------------------------------------------------------------------------------------------------------|-----------------------------------------------------------------------------------------------|------------------------------------------|---------------------------------------------------------------------------------------------------|-----------------|
| No.                                | Initial Report or Follow-up | Brief Description of Event | Onset Date & Time (dd/mmm/yyyy HH:MM) | Intensity grade:<br>1. Mild<br>2. Moderate<br>3. Severe<br>4. Life-threatening<br>5. Fatal or Death | Expected AE?<br>Y / N | SAE?<br>Y / N<br><br>If YES, fill out SAE Form | Action Taken<br>1. None<br>2. Medication<br>3. New or Prolonged Hospitalization<br>4. Procedure / Surgery<br>5. Other, specify | Outcome<br>1. Resolved<br>2. Resolved w/ sequelae<br>3. Ongoing<br>4. Death<br>5. Lost to f/u | Date & Time Resolved (dd/mmm/yyyy HH:MM) | Relationship to Study<br>1. Unrelated<br>2. Unlikely<br>3. Possible<br>4. Probable<br>5. Definite | Site PI Initial |
|                                    |                             |                            |                                       |                                                                                                     |                       |                                                |                                                                                                                                |                                                                                               |                                          |                                                                                                   |                 |
|                                    |                             |                            |                                       |                                                                                                     |                       |                                                |                                                                                                                                |                                                                                               |                                          |                                                                                                   |                 |
|                                    |                             |                            |                                       |                                                                                                     |                       |                                                |                                                                                                                                |                                                                                               |                                          |                                                                                                   |                 |
|                                    |                             |                            |                                       |                                                                                                     |                       |                                                |                                                                                                                                |                                                                                               |                                          |                                                                                                   |                 |
|                                    |                             |                            |                                       |                                                                                                     |                       |                                                |                                                                                                                                |                                                                                               |                                          |                                                                                                   |                 |
|                                    |                             |                            |                                       |                                                                                                     |                       |                                                |                                                                                                                                |                                                                                               |                                          |                                                                                                   |                 |
|                                    |                             |                            |                                       |                                                                                                     |                       |                                                |                                                                                                                                |                                                                                               |                                          |                                                                                                   |                 |
|                                    |                             |                            |                                       |                                                                                                     |                       |                                                |                                                                                                                                |                                                                                               |                                          |                                                                                                   |                 |
|                                    |                             |                            |                                       |                                                                                                     |                       |                                                |                                                                                                                                |                                                                                               |                                          |                                                                                                   |                 |

Two Randomized Controlled Trials of Non-Steroidal Or Opioid Analgesia Use for Children with Musculoskeletal Injuries: The No OUCH Study

|                    |                                                                                       |                                        |
|--------------------|---------------------------------------------------------------------------------------|----------------------------------------|
| REB # :            | Study ID                                                                              | Enrolment Date                         |
| PI: Dr. Samina Ali | _____-_____-_____- - _____-_____-_____-<br>(site - preference group - patient number) | _____/_____/20_____<br>dd / mmm / yyyy |

SERIOUS ADVERSE EVENTS FORM

|                                                                                                                            |                                                                                                                                                                                                                                                                                                                                                                        |
|----------------------------------------------------------------------------------------------------------------------------|------------------------------------------------------------------------------------------------------------------------------------------------------------------------------------------------------------------------------------------------------------------------------------------------------------------------------------------------------------------------|
| Date and time Site Investigator and Site Research Coordinator were notified:<br><i>(to be completed by Research Nurse)</i> | _____/_____/_____- : ____-<br>dd / mmm / yyyy (24 hour clock)                                                                                                                                                                                                                                                                                                          |
| <b>To be completed by site RC / Investigator</b>                                                                           |                                                                                                                                                                                                                                                                                                                                                                        |
| Date and time the local REB was notified:                                                                                  | _____/_____/_____- : ____-<br>dd / mmm / yyyy (24 hour clock)<br><br><input type="checkbox"/> Not applicable<br><i>Local SAEs must be reported to REB if the event is serious, unexpected, and considered to be related or possibly related to the study. Local SAEs are to be reported to the REB (via email to REB coordinator) within 7 days of their discovery</i> |
| Date and time the lead site Principal Investigator was notified:                                                           | _____/_____/_____- : ____-<br>dd / mmm / yyyy (24 hour clock)                                                                                                                                                                                                                                                                                                          |
| Follow up comments:<br><i>(to be completed by site Investigator)</i>                                                       |                                                                                                                                                                                                                                                                                                                                                                        |

Signature of Research Nurse: \_\_\_\_\_

Signature of Site Investigator: \_\_\_\_\_

Date: \_\_\_\_/\_\_\_\_/\_\_\_\_\_  
dd / mmm / yyyy

Date: \_\_\_\_/\_\_\_\_/\_\_\_\_\_  
dd / mmm / yyyy

Two Randomized Controlled Trials of Non-Steroidal Or Opioid Analgesia Use for Children with Musculoskeletal Injuries: The No OUCH Study

|                    |                                                                     |                                         |
|--------------------|---------------------------------------------------------------------|-----------------------------------------|
| <b>REB # :</b>     | <b>Study ID</b>                                                     | <b>Enrolment Date</b>                   |
| PI: Dr. Samina Ali | _____ - _____ - _____<br>(site - preference group - patient number) | ____ / ____ / 20____<br>dd / mmm / yyyy |

**PROTOCOL DEVIATION FORM**

Did any Protocol Deviations Occur?  Yes  No

| Description of Protocol Deviation | Deviation Category/ Code* | Date Deviation Occurred (dd/mm/yyyy) | Time Deviation Occurred (HH:MM) | Date REB Notified (if applicable) (dd/mm/yyyy) | Date Sponsor Notified (if applicable) (dd/mm/yyyy) | Site PI Initial |
|-----------------------------------|---------------------------|--------------------------------------|---------------------------------|------------------------------------------------|----------------------------------------------------|-----------------|
| 1)                                |                           |                                      |                                 | <input type="checkbox"/> Not applicable        | <input type="checkbox"/> Not applicable            |                 |
| 2)                                |                           |                                      |                                 | <input type="checkbox"/> Not applicable        | <input type="checkbox"/> Not applicable            |                 |
| 3)                                |                           |                                      |                                 | <input type="checkbox"/> Not applicable        | <input type="checkbox"/> Not applicable            |                 |
| 4)                                |                           |                                      |                                 | <input type="checkbox"/> Not applicable        | <input type="checkbox"/> Not applicable            |                 |
| 5)                                |                           |                                      |                                 | <input type="checkbox"/> Not applicable        | <input type="checkbox"/> Not applicable            |                 |

Two Randomized Controlled Trials of Non-Steroidal Or Opioid Analgesia Use for Children with Musculoskeletal Injuries: The No OUCH Study

| REB # :            | Study ID                                                                                                | Enrolment Date                                                        |
|--------------------|---------------------------------------------------------------------------------------------------------|-----------------------------------------------------------------------|
| PI: Dr. Samina Ali | <p style="text-align: center;">_____ - _____ - _____<br/>(site - preference group - patient number)</p> | <p style="text-align: center;">__ / __ / 20__<br/>dd / mmm / yyyy</p> |

|                                                                                                                                                                                                                                                                                                                                                                                                                                                                                                                                                                                                                                                                                                                                                                                                                                                                                                                                                                                                                                                                                                                                                                                                                                                                                                                                                                                                                                    |
|------------------------------------------------------------------------------------------------------------------------------------------------------------------------------------------------------------------------------------------------------------------------------------------------------------------------------------------------------------------------------------------------------------------------------------------------------------------------------------------------------------------------------------------------------------------------------------------------------------------------------------------------------------------------------------------------------------------------------------------------------------------------------------------------------------------------------------------------------------------------------------------------------------------------------------------------------------------------------------------------------------------------------------------------------------------------------------------------------------------------------------------------------------------------------------------------------------------------------------------------------------------------------------------------------------------------------------------------------------------------------------------------------------------------------------|
| <p><b>*DEVIATION CATEGORIES / CODES:</b></p> <p><u>Safety (Category A)</u></p> <ol style="list-style-type: none"> <li>1. Not reporting an SAE within 72 hours</li> <li>2. AE/SAE is not reported to IRB</li> </ol> <p><u>Informed Consent (Category B)</u></p> <ol style="list-style-type: none"> <li>3. Failure to obtain informed consent</li> <li>4. Consent form used was not current REB-approved version Consent form missing</li> <li>5. Consent form missing</li> <li>6. Consent form not signed and dated by participant</li> <li>7. Consent form does not contain all required signatures</li> </ol> <p><u>Eligibility (Category C)</u></p> <ol style="list-style-type: none"> <li>8. Participant did not meet eligibility criterion</li> <li>9. Randomization of an ineligible participant</li> <li>10. Participant randomized prior to completing Baseline Assessment, etc.</li> </ol> <p><u>Protocol implementation (Category D)</u></p> <ol style="list-style-type: none"> <li>11. Failure to keep IRB approval up to date</li> <li>12. Participant receives wrong treatment</li> <li>13. Use of unallowable concomitant treatments</li> <li>14. Prescribed dosing outside protocol guidelines</li> <li>15. Missed assessment</li> <li>16. Assessment completed outside of protocol guidelines for timing</li> </ol> <p><u>Other</u></p> <ol style="list-style-type: none"> <li>17. Other, specify in log</li> </ol> |
|------------------------------------------------------------------------------------------------------------------------------------------------------------------------------------------------------------------------------------------------------------------------------------------------------------------------------------------------------------------------------------------------------------------------------------------------------------------------------------------------------------------------------------------------------------------------------------------------------------------------------------------------------------------------------------------------------------------------------------------------------------------------------------------------------------------------------------------------------------------------------------------------------------------------------------------------------------------------------------------------------------------------------------------------------------------------------------------------------------------------------------------------------------------------------------------------------------------------------------------------------------------------------------------------------------------------------------------------------------------------------------------------------------------------------------|

For peer review only



A study of Non-Steroidal Or Opioid Analgesia Use for Children with Musculoskeletal Injuries: The No OUCH Trials

| REB # :            | Study ID                                                         | Enrolment Date                       |
|--------------------|------------------------------------------------------------------|--------------------------------------|
| PI: Dr. Samina Ali | ____ - ____ - ____<br>(site - preference group - patient number) | ___ / ___ / 20___<br>dd / mmm / yyyy |

## Unanticipated Problems (UP) Form

|                                                                                                                                                                                                                                                                                 |                                                                                                                                                                                                                                                                                                                                                                                                                                                                                                                                                                                                                                                                                                                         |
|---------------------------------------------------------------------------------------------------------------------------------------------------------------------------------------------------------------------------------------------------------------------------------|-------------------------------------------------------------------------------------------------------------------------------------------------------------------------------------------------------------------------------------------------------------------------------------------------------------------------------------------------------------------------------------------------------------------------------------------------------------------------------------------------------------------------------------------------------------------------------------------------------------------------------------------------------------------------------------------------------------------------|
| Date UP Identified:                                                                                                                                                                                                                                                             | ___ / ___ / ___<br>dd / mmm / yyyy                                                                                                                                                                                                                                                                                                                                                                                                                                                                                                                                                                                                                                                                                      |
| Identify UP:<br>(Give the UP a brief title)                                                                                                                                                                                                                                     | Open text                                                                                                                                                                                                                                                                                                                                                                                                                                                                                                                                                                                                                                                                                                               |
| The Unanticipated Problem was unexpected in terms of nature, severity or frequency:                                                                                                                                                                                             | <input type="checkbox"/> Yes <input type="checkbox"/> No                                                                                                                                                                                                                                                                                                                                                                                                                                                                                                                                                                                                                                                                |
| The Unanticipated Problem is possibly related to participation in the research:                                                                                                                                                                                                 | <input type="checkbox"/> Yes <input type="checkbox"/> No                                                                                                                                                                                                                                                                                                                                                                                                                                                                                                                                                                                                                                                                |
| The Unanticipated Problem suggests that the research places subjects or others at a greater risk of harm than was previously known or recognized:                                                                                                                               | <input type="checkbox"/> Yes <input type="checkbox"/> No                                                                                                                                                                                                                                                                                                                                                                                                                                                                                                                                                                                                                                                                |
| Briefly Describe the UP:<br>(Include additional or supplementary information as necessary. Include date of incident, date of discovery, describe harm or potential harm that occurred to subject(s), whether the incident is resolved, whether the subject(s) remains on study) | Open text                                                                                                                                                                                                                                                                                                                                                                                                                                                                                                                                                                                                                                                                                                               |
| What action was taken with the study as a result of the Unanticipated Problem?<br>(Check all that apply)                                                                                                                                                                        | <input type="checkbox"/> No action<br><input type="checkbox"/> Revise protocol to eliminate apparent immediate hazards to subjects<br><input type="checkbox"/> Modification of inclusion or exclusion criteria to mitigate newly identified risks<br><input type="checkbox"/> Implementation of additional procedures for monitoring subjects<br><input type="checkbox"/> Suspension of enrollment of new subjects<br><input type="checkbox"/> Notify currently enrolled subjects<br><input type="checkbox"/> Suspension of research procedures in currently enrolled subject<br><input type="checkbox"/> Modification of consent documents to include a description of newly recognized risks (site and/or study wide) |

## A study of Non-Steroidal Or Opioid Analgesia Use for Children with Musculoskeletal Injuries: The No OUCH Trials

| REB # :            | Study ID                                                         | Enrolment Date                   |
|--------------------|------------------------------------------------------------------|----------------------------------|
| PI: Dr. Samina Ali | ____ - ____ - ____<br>(site - preference group - patient number) | ___ / ___ / 20___<br>dd mmm yyyy |

|                                                            |                                                                                                                                                                                                                                                                                     |
|------------------------------------------------------------|-------------------------------------------------------------------------------------------------------------------------------------------------------------------------------------------------------------------------------------------------------------------------------------|
|                                                            | <input type="checkbox"/> Provision of additional information about newly recognized risks to previously enrolled subjects<br><input type="checkbox"/> Other: _____                                                                                                                  |
| Is the Unanticipated Problem a serious adverse event?      | <input type="checkbox"/> Yes <input type="checkbox"/> No<br><i>If the Unanticipated Problem is a serious adverse event, submit this form and make sure that the adverse event form and Serious Adverse Event report have been completed and submitted as per local site policy.</i> |
| Was the Unexpected Problem reported to the sponsor?        | <input type="checkbox"/> Yes <input type="checkbox"/> No                                                                                                                                                                                                                            |
| <b>If YES</b> , Date UP reported to the sponsor:           | ___ / ___ / ___<br>dd mmm yyyy                                                                                                                                                                                                                                                      |
| <b>If NO</b> , why was the UP not reported to the sponsor? | Open text                                                                                                                                                                                                                                                                           |
| Was the Unexpected Problem reported to the local REB?      | <input type="checkbox"/> Yes <input type="checkbox"/> No                                                                                                                                                                                                                            |
| <b>If YES</b> , Date UP reported to the REB:               | ___ / ___ / ___<br>dd mmm yyyy                                                                                                                                                                                                                                                      |
| <b>If NO</b> , why was the UP not reported to the REB?     | Open text                                                                                                                                                                                                                                                                           |

A study of Non-Steroidal Or Opioid Analgesia Use for Children with Musculoskeletal Injuries: The No OUCH Trials

| REB # :            | Study ID                                                         | Enrolment Date                      |
|--------------------|------------------------------------------------------------------|-------------------------------------|
| PI: Dr. Samina Ali | ____ - ____ - ____<br>(site - preference group - patient number) | ____ / ____ / 20____<br>dd mmm yyyy |

**Early Withdrawal Form**

|                                                |                                                                                                                                                                                                                                                                            |
|------------------------------------------------|----------------------------------------------------------------------------------------------------------------------------------------------------------------------------------------------------------------------------------------------------------------------------|
| Did participant withdraw from the study?       | <input type="checkbox"/> Yes <input type="checkbox"/> No                                                                                                                                                                                                                   |
| <b><u>If YES:</u></b> Date of Discontinuation: | ____ / ____ / ____<br>dd mmm yyyy                                                                                                                                                                                                                                          |
| Reasons for Discontinuation:                   | <input type="checkbox"/> Adverse Event / Serious Adverse Event<br><input type="checkbox"/> Death<br><input type="checkbox"/> Withdrawal of Consent / Assent<br><input type="checkbox"/> Protocol Violation, Specify _____<br><input type="checkbox"/> Other, Specify _____ |
| <b><u>If withdrew consent / assent:</u></b>    |                                                                                                                                                                                                                                                                            |
| 1. Permission to use collected data?           | <input type="checkbox"/> Yes <input type="checkbox"/> No                                                                                                                                                                                                                   |
| 2. Permission to conduct Chart Review?         | <input type="checkbox"/> Yes <input type="checkbox"/> No                                                                                                                                                                                                                   |
| 3. Telephone follow up to continue?            | <input type="checkbox"/> Yes <input type="checkbox"/> No                                                                                                                                                                                                                   |
| <u>Comments:</u>                               |                                                                                                                                                                                                                                                                            |

## Data and Safety Monitoring Board (DSMB) Charter

|                                   |                                                                                                 |
|-----------------------------------|-------------------------------------------------------------------------------------------------|
| Protocol                          | Strategy for Patient Orientation Research (SPOR)<br>Innovative Clinical Trials Multi-Year Grant |
| Nominated Principal Investigator: | Dr. Terry Klassen                                                                               |
| Protocol title:                   | Innovation in Pediatric Trials (iPCT) Initiative                                                |
| Sponsor:                          | CIHR - SPOR                                                                                     |
| DSMB Charter version:             | 3.5                                                                                             |
| DSMB Charter date:                | January 18, 2019                                                                                |

### 1. Introduction

The purpose of this charter is to define the responsibilities of the SPOR Innovation in Pediatric Clinical Trials (iPCT) initiative's Data Safety Monitoring Board (DSMB), detail membership requirements, describe the data to be reviewed, delineate the meeting process, and outline the considerations and policies of the DSMB. The DSMB will act in an independent expert advisory capacity to monitor participant safety. The DSMB may wish to review this Charter at regular intervals to determine whether any changes are needed.

### 2. Organization and interactions

#### a. Membership of the DSMB

The DSMB consists of a Chair and 4-6 members with expertise in relevant (clinical) specialties for the study, including members who are knowledgeable about statistical methods for clinical research and analysis of research data. Other members should bring expertise in the clinical specialty the studies are conducted in (pediatric emergency medicine).

The DSMB Chair must be willing to make firm commitment to participate as Chair for the duration of the project.

The DSMB members are appointed by the Network Coordination Centre (NCC) Lead in consultation with the DSMB Chair and must meet the following requirements:

- Be willing to serve as a DSMB member for the duration of the project;
- Comply with the conflict of interest policy specified in this charter;

Although DSMB members are expected to serve for the full duration, in the unlikely event that a member is unable to continue participation, the reason will be documented, and a replacement member will be selected by the DSMB Chair. The new member must have comparable expertise and qualifications to the DSMB member she/he is replacing.

A list of members are mentioned in Appendix A.

### b. Conflict of Interest

The DSMB must consist of individuals who are impartial, independent of the investigator(s) and who have no financial or scientific interest in the study that could impair the members' ability to objectively review study data as outlined below:

- DSMB members must not have any real or perceived scientific, financial, professional, personal, proprietary, or another conflict of interest related to the conduct, outcome, or impact of the study. DSMB members should preferably not be working at any of the participating sites.
- DSMB members must not be engaged in any simultaneously occurring competitive studies in any role that could pose a conflict of interest. DSMB members must also identify and disclose any concurrent service on other DSMBs of the same, related, or competing products;
- DSMB members must be independent of the sponsor, regulatory agencies, principal investigators, clinical care of the study participants, or any other capacity related to study operations. All DSMB members must disclose all possible conflicts of interest in writing before beginning service as a DSMB member.

### c. Confidentiality

All materials, discussions, and proceedings of the DSMB are privileged and confidential. DSMB members agree to use this information exclusively to accomplish the responsibilities of the DSMB. No communication of the deliberations or recommendations of the DSMB, either written or oral, may occur except as required for the DSMB to fulfill its responsibilities. Individual DSMB members are expected to maintain confidentiality regarding the study outside the DSMB (including, but not limited to the investigators, REB, regulatory agencies, or sponsor) except as authorized by the DSMB.

If requested, this charter and accompanying list of Board members may be sent to a Research Ethics Board (REB). In the case, this charter will be marked as not for dissemination, and be sent by the Study Principal Investigator or the Network Manager to the REB Chair, with a cover letter. The SPOR - iPCT initiative does not release Board members' names in response to media inquiries until after publication of the main results of the study.

## 3. DSMB Responsibilities

The DSMB is responsible for safeguarding the interests of individuals participating in iPCT and approved related trials.

This responsibility will be implemented by providing recommendations for continuation or early termination of iPCT trials based on an assessment of safety. The DSMB may also make

recommendations related to the selection, recruitment or retention of participants, their management and adherence to protocol-specific regimens, and the procedures for data management and quality control.

The DSMB is advisory to the Study Principal Investigators and ultimately the iPCT Steering Committee. The DSMB is an independent board appointed by the NCC Lead and approved by the SPOR - iPCT Executive team.

The DSMB's responsibilities are to regularly monitor iPCT clinical trials, review and assess the performance of its operations, and make recommendations, as appropriate, to the Study Principal Investigator and, through the NCC lead, to the iPCT Steering Committee concerning:

- Protection of the safety and interests of the study participants;
- Review of the research protocol, informed consent documents, and plans for data safety and monitoring before initiation of study, - if needed - periodically during the study, and at the conclusion of the study;
- Conduct interim and final evaluation of the study, including safety data, participant recruitment, accrual and retention, risk versus benefit, and other factors that can affect study outcome, including aggregate and individual participant data related to safety.
- Review and evaluation of *ad hoc* safety issues concerning the study at the request of the Study Principal Investigator.
- Continuation, termination, or other modifications of the study based on the performance and observed beneficial or adverse effects of the study; and
- Amendments to the study protocol and consent forms, including whether any new data from other sources affect the equipoise of the study being monitored
- Operation according to the procedures described in this charter and all procedures of the DSMB.

## 4. DSMB Tasks

### a. Before study opening

The DSMB will review completed protocols to assess that the monitoring plan ensures patient safety and research integrity. Consent and assent forms will be reviewed.

### b. During the study

Once a study is open the protocol monitoring shall be facilitated at least semiannually (generally by conference calls) by submission of data summaries from the Data Coordinating Centre regarding each study to the Network Manager who sends these data summaries and available site monitoring reports to the DSMB Chair for preparation of the DSMB Report.

The primary responsibility of the DSMB is to monitor the study for participant safety. The DSMB will review the following safety and related data:

- Participant recruitment, accrual, retention, and withdrawal information;
- Adverse events (AEs) and serious adverse events (SAEs);
  - Tabulated by body system, intensity, seriousness, duration, treatment given, and the relationship to the study drug and study procedure
  - Comparison of events that occur between treatment arms
  - Individual events of particular concern
- Site monitoring reports;
- Any other safety-supporting data requested by the DSMB.

The DSMB will make a recommendation regarding the study continuation, termination, or modifications based on the review. Studies that are accruing poorly may be recommended to be placed into probationary status or closed.

Serious adverse events (SAEs) will be monitored by the DSMB Chair and must be reported by the Sponsor to the DSMB Chair via email **within seven working days** of learning of the event.

All participant withdrawals will be monitored by the DSMB Chair and must be reported by the Sponsor to the DSMB Chair via email **within two weeks** of learning of the withdrawal.

The DSMB may consider data from other studies or external sources during its deliberations, if available, as these results may have a profound impact on the status of the participants and design of the current study.

## 5. Meetings

### a. Projected Schedule of Meetings

An initial meeting of the DSMB will be held before the start of the studies or as soon after that as possible for the members to:

- review the charter;
- receive an overview of study network activities;
- form an understanding of the protocol and definitions being used;
- establish a distribution and meeting schedule;
- review the study modification and termination guidelines; and

Subsequent DSMB meetings will be held to review and discuss study data according to the schedule as described in the table below.

| <i>Timeline</i> | <i>Data Review by</i> |
|-----------------|-----------------------|
| Biannually      | Entire DSMB           |
| Ad hoc (SAE)    | Entire DSMB           |

### b. *Ad Hoc Meetings*

An *ad hoc* meeting of the DSMB may be called at any time by the DSMB Chair or Study Principle Investigator if imminent participant safety issues arise. If a significant safety concern arises during the study, the DSMB Chair may convene a meeting to review safety and any other aspect of the study. Significant safety events may include, but are not limited to, the following:

- A death or life-threatening condition sustained by a participant, regardless of causality;
- An unexpected serious safety issue newly identified during the development program that could expose participants to unnecessary risks;
- Any other concern regarding participant safety raised by any DSMB member.

Proposed study amendments that significantly alter the treatment plan and deal with participant safety concerns will prompt an ad hoc meeting of the DSMB for review before implementation of changes. This may require suspension of enrollment pending DSMB review.

### c. *Meeting Format*

DSMB meetings will be conducted by teleconference and facilitated by the DSMB Chair, consisting of an open session and a closed session. A quorum, defined as **four members of the DSMB including the DSMB Chair must be present to hold a DSMB meeting.**

#### *Open Session*

The open session may be attended by the investigator(s) and representatives of the Sponsor. Investigator and sponsor representatives may attend the open session with DSMB members. The Data Coordinating Centre provides a report for each study, containing: recruitment updates, compliance, withdrawals and other blinded data and non-confidential information regarding operational/logistical issues. This session gives the DSMB an opportunity to query an investigator about issues that have arisen during the review of safety data. Unblinded information will not be discussed in the open session.

#### *Closed Session (if needed)*

The closed session will be restricted to attendance by the DSMB members, and a recorder (NCC administrator) for the review of an interim analysis, prepared by the Methods Core.



At the closed session, study blinding may be broken. Closed sessions also consist of a review of the recommendations the DSMB wishes to make to the investigator and a formal vote.

#### d. Voting

DSMB recommendations will be agreed upon by formal majority vote. In the event of a split vote, the DSMB Chair will cast the deciding vote.

## 6. DSMB Considerations and policies

### a. Stopping Rules

After considering the information in the open and closed session DSMB report, the DSMB will determine whether the study should continue as planned, proceed with modifications, or be terminated. The justification to terminate the study may be due to the DSMB's analysis that there are overwhelming safety issues. If the DSMB votes to terminate the study, the Network Manager will prepare a final study report for the DSMB, and a final DSMB meeting will be held. The DSMB's recommendations at the final DSMB meeting may include continuing action items to the investigator based on the final review.

### b. Meeting Minutes

Minutes of DSMB meetings will be kept in two parts: open session and closed session.

#### *Open Session*

Open session meeting minutes include (at a minimum):

- Protocol number, study title, version;
- DSMB meeting date;
- Copy of the open session agenda;
- A list of attendees, including DSMB members and any others present, listing their professional title and role at the meeting;
- A list of attendees who have been unblinded to any data;
- Information reviewed and related discussion during the open session, including rationale for recommendations provided by voting DSMB members;
- A copy of the DSMB recommendation letter.

The DSMB Recorder is responsible for recording and generating meeting minutes of both open and closed sessions.

Draft minutes of open sessions will be sent to the DSMB Chair for review and approval within three working days of the meeting. The draft minutes will be reviewed by the DSMB Chair within seven working days, and final minutes of the open session will be distributed to the DSMB

members and the investigator within ten working days of the DSMB meeting. Final minutes will be distributed to DSMB members by PDF version sent by secure email.

#### *Closed Session*

Draft minutes of closed sessions will be sent to the DSMB Chair for review and approval within one working day of the DSMB meeting. The draft minutes will be reviewed by the DSMB Chair within three working days, and final minutes of the closed session will be distributed only to the DSMB members within five working days of the DSMB meeting. Final minutes will be distributed to DSMB members by PDF version sent by secure email.

Closed session meeting minutes will not be divulged beyond the DSMB until after the study is closed unless either:

- The DSMB voting members approve the release to preserve the integrity of the study and the safety of participants; or
- Health Canada –Therapeutic Product Directorate requires disclosure.

The investigator, Network Manager and sponsor will receive a complete copy of the open and closed session meeting minutes at the completion of the study.

## 7. Report to DSMB

### a. Responsibility for Preparing DSMB Data Reports (open session)

The report is prepared by the DCC, and sent to the DSMB Chair three weeks before the planned meeting.

### b. Responsibility for Preparing DSMB Interim analysis (closed session)

The report is prepared by the Methods Core, and sent to the DSMB Chair three weeks before the meeting.

### a. Content of the Reports to the DSMB

The DSMB chair will prepare the report to include two DSMB parts – open session and (if available) closed session.

- *Open Session Report:* The open session report presents data only in aggregate and focuses on study conduct issues, like accrual and withdrawal rates, eligibility rates, reasons for ineligibility and discussion of blinded materials. To protect the blind participant-specific data and treatment group data are not presented in the open session report.
- *Closed Session Report:* In the event of serious adverse events or significant protocol violations, the DSMB may bequest closed session reports that include unblinded comparative statistical outputs. The closed session reports include unblinded comparative

1  
2  
3  
4  
5  
6 statistical outputs. The closed session report is considered confidential and must be  
7 destroyed at the conclusion of the meeting.  
8

#### 9 **b. Distribution of the Report to the DSMB**

10 Reports to the DSMB are distributed to DSMB members two weeks before a scheduled meeting.  
11 The report is dated and provided to individual DSMB members in PDF format sent by secure  
12 email.  
13

#### 14 **c. DSMB Reports to Investigator**

15  
16 Following each meeting, the DSMB will issue a confidential report separate from the minutes of  
17 the open and closed sessions that will be sent to the investigator. The report includes a  
18 summary of the open session discussion, does not include unblinded data or discussion of the  
19 unblinded data, and provides the DSMB's recommendations accompanied by clear, concise  
20 rationale for them. The report should contain sufficient information to explain the rationale for  
21 any specific actions by the DSMB without jeopardizing conduct or scientific integrity of the study  
22 (unblinding). If no recommendations are made, the report may simply state, "The DSMB  
23 recommends that the study continues as planned."  
24  
25

26  
27  
28 The report should be presented to the investigator both in writing and orally. The DSMB Chair  
29 communicates directly with the investigator to allow them the opportunity to ask questions and  
30 discuss any recommendations. If the report does include DSMB recommendations for changes  
31 or termination of the study, the report must include a minimum amount of data such that the  
32 investigator can make a reasoned decision in response to the recommendation.  
33

34  
35 If the investigator accepts the recommendations of the DSMB, the investigator will be  
36 responsible for implementing the actions in response. In the event the study must be amended,  
37 the investigator will prepare and submit the amendment to the DSMB and REB for approval  
38 before implementing amendment changes.  
39

40  
41 If the investigator rejects the DSMB's recommendations, the investigator must provide the  
42 DSMB with a written explanation of their decision and supporting rationale within one working  
43 day. If the DSMB has recommended that the study is stopped, but the investigator decides to  
44 continue the study, the investigator will inform all concerned regulatory authorities of its  
45 decision to continue the study despite the DSMB's recommendation. Public disclosure of the  
46 decision to stop the study is at the discretion of the investigator. The DSMB will not make any  
47 public announcements.  
48  
49  
50  
51  
52  
53  
54  
55  
56  
57

## 8. Other

### a. Amendments to the DSMB Charter

This DSMB charter can be amended as needed during the study. All amendments will be documented with sequential version numbers and revision dates and will be recorded in the open session DSMB meeting minutes. Each revision will be reviewed and agreed upon by the DSMB.

### b. Archiving

All DSMB documentation and records will be retained in sealed envelopes in the Sponsor Study File by the National Coordinating Centre for 25 years after completion of the study. Access to archived data will be controlled by the sponsor, which will release the information only as specified in this charter or as required by law.

For peer review only

Working in partnership with



For peer review only: <http://bmjopen.bmj.com/site/about/guidelines.xhtml>

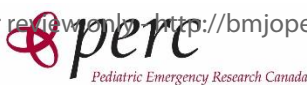

Supported by

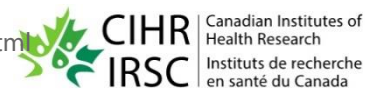

## Appendix A – DSMB members

### Voting members

| <i>Member name</i>               | <i>Conflicts of interest</i> |
|----------------------------------|------------------------------|
| <i>Garth Meckler<br/>(chair)</i> |                              |
| <i>Mark Roback</i>               |                              |
| <i>Anupam Kharbanda</i>          |                              |
| <i>Eyal Cohen</i>                |                              |
| <i>Lise Nigrovic</i>             |                              |

### Ex-officio (non-voting)

NCC Lead: Dr. Geert W. 't Jong

Network Manager: Tannis Erickson

peer review only

Working in partnership with

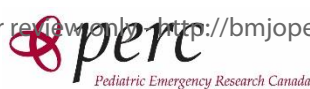

Supported by

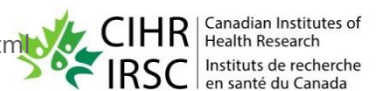

## Appendix B – Definitions

Study Principal Investigator: The investigator who is primarily responsible for a trial.

SPOR Principal Investigator: The investigator designated as Primary Investigator on the SPOR application (Dr. Klassen).

iPCT Steering Committee: Executive committee consisting of the study leads (PIs) and the leads within each core (Network Coordinating Centre; Data Coordinating Centre; Methods Core)

For peer review only

Working in partnership with

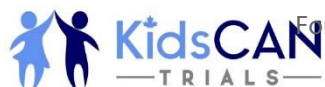

For peer review only: <http://bmjopen.bmj.com/site/about/guidelines.xhtml>

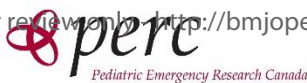

Supported by

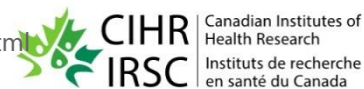

WCHRI

Study: No OUCH

Study Title

Version: 1.0

**Data Management Plan**

Date: 20 Mar 2019

| Study Details        |                                                                                                                            |                       |
|----------------------|----------------------------------------------------------------------------------------------------------------------------|-----------------------|
| <b>Study Title:</b>  | No-OUCH<br>A Study of Non-Steroidal or Opioid Analgesia Use for Children with Musculoskeletal Injuries: The No OUCH Trials |                       |
| <b>Investigator:</b> | Dr. Samina Ali                                                                                                             | <b>Code:</b> 00073476 |
| <b>Sponsor:</b>      | University of Alberta                                                                                                      |                       |
| Document History     |                                                                                                                            |                       |
| Version              | Date                                                                                                                       | Reason For Change     |
| 1                    | 20 Mar 2019                                                                                                                | Initial draft         |

## Introduction

This document defines the data management approach for the named study. Specifically it defines data sources, data handling practice and relevant additional documentation.

## Document Control

This document is to be authorized by WCHRI DCC Team Lead, their designee or a senior manager within the Women & Children's Health Research Institute (WCHRI). The study sponsor (sponsor-initiated studies) and/or Principal Investigator (investigator-initiated studies) should also review and authorize the production version and any subsequent modifications.

Following authorization a read-only 'controlled' copy will be created and the document will be allocated a version number. Subsequent changes will be authorized (see above) and the version number incremented. Each authorized version will be retained on file for audit purposes.

## Study Title

*A Study of Non-Steroidal or Opioid Analgesia Use for Children with Musculoskeletal Injuries: The No OUCH Trials*

## Study Overview

This study will be comprised of two Phase 2, six-centre, randomized, double-blind, placebo-controlled trials that will be run simultaneously. The primary objective of this study is to determine the effectiveness of a combination of opioid and non-opioid oral analgesic medications (PO ibuprofen + PO acetaminophen; PO ibuprofen + PO hydromorphone; PO ibuprofen alone) for the acute pain management of children with an acute musculoskeletal (MSK) limb injury.

The study aims to recruit 536 children, aged 6-17 years, presenting to one of six Canadian pediatric emergency departments (EDs) with an acute MSK injury (<24 hours old) of a single limb over a period of 18 months.

Participants who participate in the Opioid Trail will receive either single-dose:

- A. Oral hydromorphone (0.05mg/kg, max 5mg) + Oral ibuprofen (10mg/kg, max 600mg), OR
- B. Oral acetaminophen (15mg/kg, max 1000mg) + Oral ibuprofen (10mg/kg, max 600mg), OR
- C. Oral ibuprofen (10mg/kg, max 600mg)

Participants who participate in the Non-Opioid Trial will receive either single-dose:

- A. Oral acetaminophen (15mg/kg, max 1000mg) + Oral ibuprofen (10mg/kg, max 600mg), OR

WCHRI

Study: No OUCH

Study Title

Version: 1.0

**Data Management Plan**

Date: 20 Mar 2019

B. Oral ibuprofen (10mg/kg, max 600mg)

Pain scores, any adverse events, level of sedation, and vital signs will be recorded every 30 minutes, for up to 120 minutes following study drug administration. Participants will also receive two follow-up questionnaires, either by email or telephone, at 24 hours and 1 week post discharge from the ED.

For inclusion and exclusion criteria see the study protocol.

### **Primary Efficacy Variables**

Primary Efficacy Endpoint will be the self-reported pain score at 60 minutes, using a 0-10 verbal Numerical Rating Scale (vNRS).

Variable: pain\_vnrs at the 60 minute mark

### **Secondary Efficacy Variables**

The Secondary Efficacy Endpoints will include:

| Endpoint                                                                                                                                                    | Variable Name                                                                                                            |
|-------------------------------------------------------------------------------------------------------------------------------------------------------------|--------------------------------------------------------------------------------------------------------------------------|
| 1. the proportion of patients with a vNRS pain score <3 at 60 minutes                                                                                       | pain_vnrs at the 60 minute mark                                                                                          |
| 2. the proportion of patients with a vNRS pain score reduction of at least 2 points out of 10 at 60 minutes                                                 | pain_vnrs at the 60 minute mark                                                                                          |
| 3. between group differences in pain scores at study time-points (T-30,T-60,T-90, T-120, T-Medical Exam and T-Xray)                                         | pain_vnrs, pain_fpsr and pain_vas at all timepoints                                                                      |
| 4. self-reported caregiver and child satisfaction with pain relief and acceptability of study medications, using a previously employed 5 point Likert scale | qp_rate<br>qp_relief<br>qc_rate<br>qc_same<br>folup2_ratetx<br>folup2_ratetx_expl<br>folup2_relief<br>folup2_relief_expl |
| 5. ED length of stay                                                                                                                                        | pscr_triage<br>disch_dt                                                                                                  |
| 6. frequency of missed fractures or dislocations                                                                                                            | disch_mddx<br>disch_raddx                                                                                                |
| 7. the proportion of children administered a rescue analgesic in the 60 minutes following administration of study medication                                | cm_sd<br>cm_st<br>cm_ed<br>cm_et                                                                                         |
| 8. time to effective analgesia, defined as the first vNRS pain score <3 post-intervention                                                                   | pain_vnrs                                                                                                                |



WCHRI

Study: No OUCH

Study Title

Version: 1.0

**Data Management Plan**

Date: 20 Mar 2019

|                                                                                                                                         |                       |
|-----------------------------------------------------------------------------------------------------------------------------------------|-----------------------|
| 9. children's self-reported pain intensity on the Visual Analog Scale (VAS) and the Faces Pain Scale-Revised (FPS-R) at all study times | pain_vas<br>pain_fpsr |
|-----------------------------------------------------------------------------------------------------------------------------------------|-----------------------|

## Safety Data

Principal Safety Endpoint will be the proportion of children with any adverse events related to study drug administration.

Secondary Safety Endpoints will include 1. the proportion of children with any serious adverse events during the study period, 2. the proportion of children in each study group with a Ramsay Sedation Score (RSS) score between 1 to 3, and 3. the proportion of children with each specific adverse event type during the study period.

## Patient Numbers

The sample size for the three-armed Opioid Trial is 105 patients per arm, for a total of 315. For the two-armed Non-Opioid Trial, a sample of 85 patients per arm, for a total of 170. Thus, the grand total for the No OUCH Study would be 485. In order to account for patients who are excluded from primary analyses due to missing data for the primary (efficacy) outcome and to adjust for loss to follow-up, the sites will recruit approximately 10% more, for a target recruitment of approximately 536 patients. However, in order to preserve the patient preference aspect of this study, which allows families to choose which trial they would like to participate in, we will over-recruit one trial in order to allow the second to achieve its sample size.

## Study Timelines

Participants are enrolled, if eligible, in the ED. Once the drug is administered, patient assessments are implemented in the ED at T0, T30, T60, T90 and T120 time points. Assessments are also collected at the time of the medical examination, time of x-rays and at discharge. Two follow-ups conducted either by phone or online survey to be completed at 1-3 days post discharge and 1-2 weeks post discharge. Total study period: 14 days for all outcome data.

First Participant visit: April 2019

Last Participant visit: expected April 2021

## Ethics Status

This is a Health Canada regulated clinical trial that requires REB approval at participating sites. It is required to be GCP-compliant and undertaken on a validated installation of REDCap.

## Data Sources

All data entry will be performed at the sites by trained research staff, with exception of the survey data which will be entered directly by the parents. Source Documents include medical records. Some data will be collected directly from the study participants and under these circumstances REDCap is considered the source document.

## Standard Operating Procedures

Data management work performed by WCHRI will be undertaken using the current version of WCHRI SOPs.

## Scope of Work

WCHRI staff will perform the following tasks:

Database build, data management activities, delivery of data for analysis, preparation of DSMB reports.

## Data Collection Mode

Data will be collected electronically (any transcription from paper will be performed at the study sites. WCHRI will not receive copies of paper CRFs or source documents.)

## CRF Design

Data collection forms have been developed by the Principal Investigator and her staff with minimal input from WCHRI.

## Data Collection System

Data will be entered into REDCap by personnel at the study sites.

## Randomization and Unblinding

For Randomization and Unblinding specifics, see the protocol.

Randomization of participants will occur outside of REDCap. Should unblinding be required, this will be performed through the study unblinding project in REDCap. In addition, 1-3 days AFTER The primary outcome measures are collected, the study arm assigned to the patient will be revealed.

## Study Monitoring

Monitoring will be performed by staff from the University of Alberta Quality Management in Clinical Research (QMCR) according to their monitoring plan.

## Document Tracking

WCHRI will not be handling paper documents for this study.

## Data Entry

The Study sites will complete electronic CRFs contained within the data collection system (REDCap) based on the contents of the patient records and other data sources.

## Data Handling

Data handling practices for this study are documented in the study's data handling manual. This document will be updated throughout the study as practices are refined and as new situations arise. Specifically, this document covers issues such as data handling conventions, self-evident corrections, data query practice and will also serve to log data handling exceptions.

## Data Quality

The approach to data quality is based on key points contained within ICH GCP. These are:

- Complete            Minimal missing values
- Accurate            Database values match original observation
- Precise              Units and measurability clearly understood
- Timely                Minimal time between observation and recording

WCHRI

Study: No OUCH

Study Title

Version: 1.0

**Data Management Plan**

Date: 20 Mar 2019

- 
- Verifiable Independent assessment or monitoring
  - Traceable Actions taken are logged

The above points will be ensured as follows:

## Data Validation and Queries

Electronic data collection forms will be programmed with online validation checks (also known as edit checks). Based on an understanding of the data collection forms these checks will:

- Alert data entry users to missing data
- Check that numeric variables and dates are within reasonable ranges
- Check for consistency within the data

Entered data will be subject to visual and electronic validation by data management staff according to an approved data validation plan. Issues that arise will be notified to the sites as queries, for resolution.

Data issues will be entered into the data capture system in the form of queries/discrepancies. Sites will respond to the queries, directly in the data collection system. Query responses will be reviewed by data management staff and closed once the issue has been resolved.

## Source Document Verification

This will be performed by study monitors according to the approved monitoring plan.

## Serious Adverse Events

Serious adverse events (SAEs) are to be reported to the sponsor (*and/or PI for investigator-initiated studies*) and ethics board, by the sites, as defined in the study protocol. Periodically the sponsor (or PI) will forward copies of SAE reports to WCHRI for reconciliation with the CRF data.

## Data Coding

Adverse events will be coded with MedDRA by WCHRI staff. A formal coding review will be undertaken by an authorized individual prior to database lock or delivery for interim analysis.

## Data Extract and Delivery

Data will be extracted into SAS data sets for delivery to the study statistician.

## Safety Oversight

Safety oversight will be under the direction of a Data and Safety Monitoring Board (DSMB). The DSMB will operate under the rules of an approved charter which will outline all terms of reference, as well as the frequency of meetings, that will be reviewed at the organizational meeting of the DSMB. Prior to each DSMB meeting, the study statistician shall prepare reports with interim data for presentation to the DSMB.

The following timelines will need to be met in order to have enough time to prepare and submit the report to the DSMB.

- Data quality review will be performed 6-8 weeks prior to the data of the planned DSMB meeting and any necessary queries raised.
- Study sites will be asked to review and respond to queries within 1-2 weeks

1 *WCHRI*

*Study: No OUCH*

2 *Study Title*

*Version: 1.0*

3 ***Data Management Plan***

*Date: 20 Mar 2019*

---

- 4
- 5 • 4-5 weeks before the DSMB meeting data will be exported and provided to the statistician for
  - 6 preparation of the DSMB reports.
- 7

## 8 **Archiving and Destruction**

9 After study completion all study materials will be returned to the Principal Investigator / Sponsor for

10 archiving.

11 Electronic data will be retained in WCHRI secure systems until such time as these systems are

12 decommissioned or until the Principal Investigator requests their deletion.

13

14

15

16

17

18

19

20

21

22

23

24

25

26

27

28

29

30

31

32

33

34

35

36

37

38

39

40

41

42

43

44

45

46

47

48

49

50

51

52

53

54

55

56

57

58

59

60

WCHRI  
 Study Title  
 Data Management Plan

Study: No OUCH  
 Version: 1.0  
 Date: 20 Mar 2019

## Tasks and Responsibilities

These are summarized in the following table:

| Task                        | Responsibility   | Notes |
|-----------------------------|------------------|-------|
| CRF design                  | PI               |       |
| Database configuration      | WCHRI            |       |
| Database documentation      | WCHRI            |       |
| Database acceptance testing | WCHRI / PI       |       |
| Monitoring                  | CRU              |       |
| Document flow and tracking  | N/A              |       |
| Data entry                  | Study sites      |       |
| Data validation             | WCHRI            |       |
| Discrepancy resolution      | Study sites      |       |
| Data extract                | WCHRI            |       |
| Analysis database creation  | WCHRI            |       |
| DSMB Reports                | WCHRI            |       |
| Study materials archiving   | Study sites / PI |       |
| Data archiving              | PI               |       |

### Authorization:

Author:  
 (Signature)

*Pamela Marples* 

Date: *12 Apr 2019*

Authorized by:  
 (PI or Sponsor)



Dr. Samina Ali

Date:

15 April 2019

# Reporting checklist for protocol of a clinical trial.

|                                                         |                     | Reporting Item                                                                                                                                                                                                                                                                           | Page Number   |
|---------------------------------------------------------|---------------------|------------------------------------------------------------------------------------------------------------------------------------------------------------------------------------------------------------------------------------------------------------------------------------------|---------------|
| Title                                                   | <a href="#">#1</a>  | Descriptive title identifying the study design, population, interventions, and, if applicable, trial acronym                                                                                                                                                                             | 1             |
| Trial registration                                      | <a href="#">#2a</a> | Trial identifier and registry name. If not yet registered, name of intended registry                                                                                                                                                                                                     | 2             |
| Trial registration: data set                            | <a href="#">#2b</a> | All items from the World Health Organization Trial Registration Data Set                                                                                                                                                                                                                 | 6-8 (Table 1) |
| Protocol version                                        | <a href="#">#3</a>  | Date and version identifier                                                                                                                                                                                                                                                              | 2             |
| Funding                                                 | <a href="#">#4</a>  | Sources and types of financial, material, and other support                                                                                                                                                                                                                              | 21            |
| Roles and responsibilities: contributorship             | <a href="#">#5a</a> | Names, affiliations, and roles of protocol contributors                                                                                                                                                                                                                                  | 20            |
| Roles and responsibilities: sponsor contact information | <a href="#">#5b</a> | Name and contact information for the trial sponsor                                                                                                                                                                                                                                       | 21            |
| Roles and responsibilities: sponsor and funder          | <a href="#">#5c</a> | Role of study sponsor and funders, if any, in study design; collection, management, analysis, and interpretation of data; writing of the report; and the decision to submit the report for publication, including whether they will have ultimate authority over any of these activities | 21            |
| Roles and responsibilities: committees                  | <a href="#">#5d</a> | Composition, roles, and responsibilities of the coordinating centre, steering committee, endpoint adjudication committee, data management team, and other individuals or                                                                                                                 | 13-14         |

|    |                      |                                                                                         |                                                       |
|----|----------------------|-----------------------------------------------------------------------------------------|-------------------------------------------------------|
|    |                      | groups overseeing the trial, if applicable (see Item 21a for data monitoring committee) |                                                       |
| 1  |                      |                                                                                         |                                                       |
| 2  |                      |                                                                                         |                                                       |
| 3  |                      |                                                                                         |                                                       |
| 4  | Background and       | <a href="#">#6a</a>                                                                     | Description of research question and justification    |
| 5  | rationale            |                                                                                         | for undertaking the trial, including summary of       |
| 6  |                      |                                                                                         | relevant studies (published and unpublished)          |
| 7  |                      |                                                                                         | examining benefits and harms for each                 |
| 8  |                      |                                                                                         | intervention                                          |
| 9  |                      |                                                                                         |                                                       |
| 10 |                      |                                                                                         |                                                       |
| 11 |                      |                                                                                         |                                                       |
| 12 | Background and       | <a href="#">#6b</a>                                                                     | Explanation for choice of comparators                 |
| 13 | rationale: choice of |                                                                                         |                                                       |
| 14 | comparators          |                                                                                         |                                                       |
| 15 |                      |                                                                                         |                                                       |
| 16 |                      |                                                                                         |                                                       |
| 17 | Objectives           | <a href="#">#7</a>                                                                      | Specific objectives or hypotheses                     |
| 18 |                      |                                                                                         |                                                       |
| 19 |                      |                                                                                         |                                                       |
| 20 | Trial design         | <a href="#">#8</a>                                                                      | Description of trial design including type of trial   |
| 21 |                      |                                                                                         | (eg, parallel group, crossover, factorial, single     |
| 22 |                      |                                                                                         | group), allocation ratio, and framework (eg,          |
| 23 |                      |                                                                                         | superiority, equivalence, non-inferiority,            |
| 24 |                      |                                                                                         | exploratory)                                          |
| 25 |                      |                                                                                         |                                                       |
| 26 |                      |                                                                                         |                                                       |
| 27 |                      |                                                                                         |                                                       |
| 28 | Study setting        | <a href="#">#9</a>                                                                      | Description of study settings (eg, community          |
| 29 |                      |                                                                                         | clinic, academic hospital) and list of countries      |
| 30 |                      |                                                                                         | where data will be collected. Reference to where      |
| 31 |                      |                                                                                         | list of study sites can be obtained                   |
| 32 |                      |                                                                                         |                                                       |
| 33 |                      |                                                                                         |                                                       |
| 34 |                      |                                                                                         |                                                       |
| 35 | Eligibility criteria | <a href="#">#10</a>                                                                     | Inclusion and exclusion criteria for participants.    |
| 36 |                      |                                                                                         | If applicable, eligibility criteria for study centres |
| 37 |                      |                                                                                         | and individuals who will perform the                  |
| 38 |                      |                                                                                         | interventions (eg, surgeons, psychotherapists)        |
| 39 |                      |                                                                                         |                                                       |
| 40 |                      |                                                                                         |                                                       |
| 41 |                      |                                                                                         |                                                       |
| 42 | Interventions:       | <a href="#">#11a</a>                                                                    | Interventions for each group with sufficient          |
| 43 | description          |                                                                                         | detail to allow replication, including how and        |
| 44 |                      |                                                                                         | when they will be administered                        |
| 45 |                      |                                                                                         |                                                       |
| 46 |                      |                                                                                         |                                                       |
| 47 | Interventions:       | <a href="#">#11b</a>                                                                    | Criteria for discontinuing or modifying allocated     |
| 48 | modifications        |                                                                                         | interventions for a given trial participant (eg,      |
| 49 |                      |                                                                                         | drug dose change in response to harms,                |
| 50 |                      |                                                                                         | participant request, or improving / worsening         |
| 51 |                      |                                                                                         | disease)                                              |
| 52 |                      |                                                                                         |                                                       |
| 53 |                      |                                                                                         |                                                       |
| 54 |                      |                                                                                         |                                                       |
| 55 |                      |                                                                                         |                                                       |
| 56 |                      |                                                                                         |                                                       |
| 57 |                      |                                                                                         |                                                       |
| 58 |                      |                                                                                         |                                                       |
| 59 |                      |                                                                                         |                                                       |
| 60 |                      |                                                                                         |                                                       |

|    |                      |                      |                                                    |                   |
|----|----------------------|----------------------|----------------------------------------------------|-------------------|
| 1  | Interventions:       | <a href="#">#11c</a> | Strategies to improve adherence to intervention    | 10                |
| 2  | adherence            |                      | protocols, and any procedures for monitoring       |                   |
| 3  |                      |                      | adherence (eg, drug tablet return; laboratory      |                   |
| 4  |                      |                      | tests)                                             |                   |
| 5  |                      |                      |                                                    |                   |
| 6  |                      |                      |                                                    |                   |
| 7  |                      |                      |                                                    |                   |
| 8  | Interventions:       | <a href="#">#11d</a> | Relevant concomitant care and interventions that   | 9                 |
| 9  | concomitant care     |                      | are permitted or prohibited during the trial       |                   |
| 10 |                      |                      |                                                    |                   |
| 11 |                      |                      |                                                    |                   |
| 12 | Outcomes             | <a href="#">#12</a>  | Primary, secondary, and other outcomes,            | 11-12             |
| 13 |                      |                      | including the specific measurement variable (eg,   |                   |
| 14 |                      |                      | systolic blood pressure), analysis metric (eg,     |                   |
| 15 |                      |                      | change from baseline, final value, time to event), |                   |
| 16 |                      |                      | method of aggregation (eg, median, proportion),    |                   |
| 17 |                      |                      | and time point for each outcome. Explanation of    |                   |
| 18 |                      |                      | the clinical relevance of chosen efficacy and      |                   |
| 19 |                      |                      | harm outcomes is strongly recommended              |                   |
| 20 |                      |                      |                                                    |                   |
| 21 |                      |                      |                                                    |                   |
| 22 |                      |                      |                                                    |                   |
| 23 |                      |                      |                                                    |                   |
| 24 |                      |                      |                                                    |                   |
| 25 | Participant timeline | <a href="#">#13</a>  | Time schedule of enrolment, interventions          | 9-11 and Figure 2 |
| 26 |                      |                      | (including any run-ins and washouts),              |                   |
| 27 |                      |                      | assessments, and visits for participants. A        |                   |
| 28 |                      |                      | schematic diagram is highly recommended (see       |                   |
| 29 |                      |                      | Figure)                                            |                   |
| 30 |                      |                      |                                                    |                   |
| 31 |                      |                      |                                                    |                   |
| 32 |                      |                      |                                                    |                   |
| 33 | Sample size          | <a href="#">#14</a>  | Estimated number of participants needed to         | 12                |
| 34 |                      |                      | achieve study objectives and how it was            |                   |
| 35 |                      |                      | determined, including clinical and statistical     |                   |
| 36 |                      |                      | assumptions supporting any sample size             |                   |
| 37 |                      |                      | calculations                                       |                   |
| 38 |                      |                      |                                                    |                   |
| 39 |                      |                      |                                                    |                   |
| 40 |                      |                      |                                                    |                   |
| 41 | Recruitment          | <a href="#">#15</a>  | Strategies for achieving adequate participant      | 11-12             |
| 42 |                      |                      | enrolment to reach target sample size              |                   |
| 43 |                      |                      |                                                    |                   |
| 44 |                      |                      |                                                    |                   |
| 45 | Allocation: sequence | <a href="#">#16a</a> | Method of generating the allocation sequence       | 9                 |
| 46 | generation           |                      | (eg, computer-generated random numbers), and       |                   |
| 47 |                      |                      | list of any factors for stratification. To reduce  |                   |
| 48 |                      |                      | predictability of a random sequence, details of    |                   |
| 49 |                      |                      | any planned restriction (eg, blocking) should be   |                   |
| 50 |                      |                      | provided in a separate document that is            |                   |
| 51 |                      |                      | unavailable to those who enrol participants or     |                   |
| 52 |                      |                      | assign interventions                               |                   |
| 53 |                      |                      |                                                    |                   |
| 54 |                      |                      |                                                    |                   |
| 55 |                      |                      |                                                    |                   |
| 56 |                      |                      |                                                    |                   |
| 57 |                      |                      |                                                    |                   |
| 58 |                      |                      |                                                    |                   |
| 59 |                      |                      |                                                    |                   |
| 60 |                      |                      |                                                    |                   |



|    |                       |                      |                                                    |      |
|----|-----------------------|----------------------|----------------------------------------------------|------|
| 1  | Allocation            | <a href="#">#16b</a> | Mechanism of implementing the allocation           | 9    |
| 2  | concealment           |                      | sequence (eg, central telephone; sequentially      |      |
| 3  | mechanism             |                      | numbered, opaque, sealed envelopes), describing    |      |
| 4  |                       |                      | any steps to conceal the sequence until            |      |
| 5  |                       |                      | interventions are assigned                         |      |
| 6  |                       |                      |                                                    |      |
| 7  |                       |                      |                                                    |      |
| 8  |                       |                      |                                                    |      |
| 9  | Allocation:           | <a href="#">#16c</a> | Who will generate the allocation sequence, who     | 9    |
| 10 | implementation        |                      | will enrol participants, and who will assign       |      |
| 11 |                       |                      | participants to interventions                      |      |
| 12 |                       |                      |                                                    |      |
| 13 |                       |                      |                                                    |      |
| 14 | Blinding (masking)    | <a href="#">#17a</a> | Who will be blinded after assignment to            | 9    |
| 15 |                       |                      | interventions (eg, trial participants, care        |      |
| 16 |                       |                      | providers, outcome assessors, data analysts), and  |      |
| 17 |                       |                      | how                                                |      |
| 18 |                       |                      |                                                    |      |
| 19 |                       |                      |                                                    |      |
| 20 |                       |                      |                                                    |      |
| 21 | Blinding (masking):   | <a href="#">#17b</a> | If blinded, circumstances under which              | 9    |
| 22 | emergency             |                      | unblinding is permissible, and procedure for       |      |
| 23 | unblinding            |                      | revealing a participant's allocated intervention   |      |
| 24 |                       |                      | during the trial                                   |      |
| 25 |                       |                      |                                                    |      |
| 26 |                       |                      |                                                    |      |
| 27 |                       |                      |                                                    |      |
| 28 | Data collection plan  | <a href="#">#18a</a> | Plans for assessment and collection of outcome,    | 9-11 |
| 29 |                       |                      | baseline, and other trial data, including any      |      |
| 30 |                       |                      | related processes to promote data quality (eg,     |      |
| 31 |                       |                      | duplicate measurements, training of assessors)     |      |
| 32 |                       |                      | and a description of study instruments (eg,        |      |
| 33 |                       |                      | questionnaires, laboratory tests) along with their |      |
| 34 |                       |                      | reliability and validity, if known. Reference to   |      |
| 35 |                       |                      | where data collection forms can be found, if not   |      |
| 36 |                       |                      | in the protocol                                    |      |
| 37 |                       |                      |                                                    |      |
| 38 |                       |                      |                                                    |      |
| 39 |                       |                      |                                                    |      |
| 40 |                       |                      |                                                    |      |
| 41 |                       |                      |                                                    |      |
| 42 | Data collection plan: | <a href="#">#18b</a> | Plans to promote participant retention and         | 10   |
| 43 | retention             |                      | complete follow-up, including list of any          |      |
| 44 |                       |                      | outcome data to be collected for participants      |      |
| 45 |                       |                      | who discontinue or deviate from intervention       |      |
| 46 |                       |                      | protocols                                          |      |
| 47 |                       |                      |                                                    |      |
| 48 |                       |                      |                                                    |      |
| 49 |                       |                      |                                                    |      |
| 50 |                       |                      |                                                    |      |
| 51 |                       |                      |                                                    |      |
| 52 |                       |                      |                                                    |      |
| 53 |                       |                      |                                                    |      |
| 54 |                       |                      |                                                    |      |
| 55 |                       |                      |                                                    |      |
| 56 |                       |                      |                                                    |      |
| 57 |                       |                      |                                                    |      |
| 58 |                       |                      |                                                    |      |
| 59 |                       |                      |                                                    |      |
| 60 |                       |                      |                                                    |      |

And Appendix 2 for Case  
Report Form

|    |                                                  |                      |                                                                                                                                                                                                                                                                                                                                       |                                                  |
|----|--------------------------------------------------|----------------------|---------------------------------------------------------------------------------------------------------------------------------------------------------------------------------------------------------------------------------------------------------------------------------------------------------------------------------------|--------------------------------------------------|
| 1  | Data management                                  | <a href="#">#19</a>  | Plans for data entry, coding, security, and storage, including any related processes to promote data quality (eg, double data entry; range checks for data values). Reference to where details of data management procedures can be found, if not in the protocol                                                                     | 13-14<br>And Appendix 3 for data management plan |
| 2  |                                                  |                      |                                                                                                                                                                                                                                                                                                                                       |                                                  |
| 3  |                                                  |                      |                                                                                                                                                                                                                                                                                                                                       |                                                  |
| 4  |                                                  |                      |                                                                                                                                                                                                                                                                                                                                       |                                                  |
| 5  |                                                  |                      |                                                                                                                                                                                                                                                                                                                                       |                                                  |
| 6  |                                                  |                      |                                                                                                                                                                                                                                                                                                                                       |                                                  |
| 7  |                                                  |                      |                                                                                                                                                                                                                                                                                                                                       |                                                  |
| 8  |                                                  |                      |                                                                                                                                                                                                                                                                                                                                       |                                                  |
| 9  |                                                  |                      |                                                                                                                                                                                                                                                                                                                                       |                                                  |
| 10 |                                                  |                      |                                                                                                                                                                                                                                                                                                                                       |                                                  |
| 11 |                                                  |                      |                                                                                                                                                                                                                                                                                                                                       |                                                  |
| 12 |                                                  |                      |                                                                                                                                                                                                                                                                                                                                       |                                                  |
| 13 | Statistics: outcomes                             | <a href="#">#20a</a> | Statistical methods for analysing primary and secondary outcomes. Reference to where other details of the statistical analysis plan can be found, if not in the protocol                                                                                                                                                              | 12-13                                            |
| 14 |                                                  |                      |                                                                                                                                                                                                                                                                                                                                       |                                                  |
| 15 |                                                  |                      |                                                                                                                                                                                                                                                                                                                                       |                                                  |
| 16 |                                                  |                      |                                                                                                                                                                                                                                                                                                                                       |                                                  |
| 17 |                                                  |                      |                                                                                                                                                                                                                                                                                                                                       |                                                  |
| 18 |                                                  |                      |                                                                                                                                                                                                                                                                                                                                       |                                                  |
| 19 |                                                  |                      |                                                                                                                                                                                                                                                                                                                                       |                                                  |
| 20 | Statistics: additional analyses                  | <a href="#">#20b</a> | Methods for any additional analyses (eg, subgroup and adjusted analyses)                                                                                                                                                                                                                                                              | 12-13                                            |
| 21 |                                                  |                      |                                                                                                                                                                                                                                                                                                                                       |                                                  |
| 22 |                                                  |                      |                                                                                                                                                                                                                                                                                                                                       |                                                  |
| 23 |                                                  |                      |                                                                                                                                                                                                                                                                                                                                       |                                                  |
| 24 | Statistics: analysis population and missing data | <a href="#">#20c</a> | Definition of analysis population relating to protocol non-adherence (eg, as randomised analysis), and any statistical methods to handle missing data (eg, multiple imputation)                                                                                                                                                       | 12-13                                            |
| 25 |                                                  |                      |                                                                                                                                                                                                                                                                                                                                       |                                                  |
| 26 |                                                  |                      |                                                                                                                                                                                                                                                                                                                                       |                                                  |
| 27 |                                                  |                      |                                                                                                                                                                                                                                                                                                                                       |                                                  |
| 28 |                                                  |                      |                                                                                                                                                                                                                                                                                                                                       |                                                  |
| 29 |                                                  |                      |                                                                                                                                                                                                                                                                                                                                       |                                                  |
| 30 |                                                  |                      |                                                                                                                                                                                                                                                                                                                                       |                                                  |
| 31 | Data monitoring: formal committee                | <a href="#">#21a</a> | Composition of data monitoring committee (DMC); summary of its role and reporting structure; statement of whether it is independent from the sponsor and competing interests; and reference to where further details about its charter can be found, if not in the protocol. Alternatively, an explanation of why a DMC is not needed | 14<br>and Appendix 4 for DSMB charter            |
| 32 |                                                  |                      |                                                                                                                                                                                                                                                                                                                                       |                                                  |
| 33 |                                                  |                      |                                                                                                                                                                                                                                                                                                                                       |                                                  |
| 34 |                                                  |                      |                                                                                                                                                                                                                                                                                                                                       |                                                  |
| 35 |                                                  |                      |                                                                                                                                                                                                                                                                                                                                       |                                                  |
| 36 |                                                  |                      |                                                                                                                                                                                                                                                                                                                                       |                                                  |
| 37 |                                                  |                      |                                                                                                                                                                                                                                                                                                                                       |                                                  |
| 38 |                                                  |                      |                                                                                                                                                                                                                                                                                                                                       |                                                  |
| 39 |                                                  |                      |                                                                                                                                                                                                                                                                                                                                       |                                                  |
| 40 |                                                  |                      |                                                                                                                                                                                                                                                                                                                                       |                                                  |
| 41 |                                                  |                      |                                                                                                                                                                                                                                                                                                                                       |                                                  |
| 42 |                                                  |                      |                                                                                                                                                                                                                                                                                                                                       |                                                  |
| 43 | Data monitoring: interim analysis                | <a href="#">#21b</a> | Description of any interim analyses and stopping guidelines, including who will have access to these interim results and make the final decision to terminate the trial                                                                                                                                                               | 12-13                                            |
| 44 |                                                  |                      |                                                                                                                                                                                                                                                                                                                                       |                                                  |
| 45 |                                                  |                      |                                                                                                                                                                                                                                                                                                                                       |                                                  |
| 46 |                                                  |                      |                                                                                                                                                                                                                                                                                                                                       |                                                  |
| 47 |                                                  |                      |                                                                                                                                                                                                                                                                                                                                       |                                                  |
| 48 |                                                  |                      |                                                                                                                                                                                                                                                                                                                                       |                                                  |
| 49 |                                                  |                      |                                                                                                                                                                                                                                                                                                                                       |                                                  |
| 50 | Harms                                            | <a href="#">#22</a>  | Plans for collecting, assessing, reporting, and managing solicited and spontaneously reported adverse events and other unintended effects of trial interventions or trial conduct                                                                                                                                                     | 10                                               |
| 51 |                                                  |                      |                                                                                                                                                                                                                                                                                                                                       |                                                  |
| 52 |                                                  |                      |                                                                                                                                                                                                                                                                                                                                       |                                                  |
| 53 |                                                  |                      |                                                                                                                                                                                                                                                                                                                                       |                                                  |
| 54 |                                                  |                      |                                                                                                                                                                                                                                                                                                                                       |                                                  |
| 55 |                                                  |                      |                                                                                                                                                                                                                                                                                                                                       |                                                  |
| 56 |                                                  |                      |                                                                                                                                                                                                                                                                                                                                       |                                                  |
| 57 |                                                  |                      |                                                                                                                                                                                                                                                                                                                                       |                                                  |
| 58 |                                                  |                      |                                                                                                                                                                                                                                                                                                                                       |                                                  |
| 59 |                                                  |                      |                                                                                                                                                                                                                                                                                                                                       |                                                  |
| 60 |                                                  |                      |                                                                                                                                                                                                                                                                                                                                       |                                                  |

|    |                                      |                      |                                                                                                                                                                                                                                    |                        |
|----|--------------------------------------|----------------------|------------------------------------------------------------------------------------------------------------------------------------------------------------------------------------------------------------------------------------|------------------------|
| 1  | Auditing                             | <a href="#">#23</a>  | Frequency and procedures for auditing trial conduct, if any, and whether the process will be independent from investigators and the sponsor                                                                                        | 14                     |
| 2  |                                      |                      |                                                                                                                                                                                                                                    |                        |
| 3  |                                      |                      |                                                                                                                                                                                                                                    |                        |
| 4  |                                      |                      |                                                                                                                                                                                                                                    |                        |
| 5  |                                      |                      |                                                                                                                                                                                                                                    |                        |
| 6  | Research ethics approval             | <a href="#">#24</a>  | Plans for seeking research ethics committee / institutional review board (REC / IRB) approval                                                                                                                                      | 14-15                  |
| 7  |                                      |                      |                                                                                                                                                                                                                                    |                        |
| 8  |                                      |                      |                                                                                                                                                                                                                                    |                        |
| 9  |                                      |                      |                                                                                                                                                                                                                                    |                        |
| 10 | Protocol amendments                  | <a href="#">#25</a>  | Plans for communicating important protocol modifications (eg, changes to eligibility criteria, outcomes, analyses) to relevant parties (eg, investigators, REC / IRBs, trial participants, trial registries, journals, regulators) | 14                     |
| 11 |                                      |                      |                                                                                                                                                                                                                                    |                        |
| 12 |                                      |                      |                                                                                                                                                                                                                                    |                        |
| 13 |                                      |                      |                                                                                                                                                                                                                                    |                        |
| 14 |                                      |                      |                                                                                                                                                                                                                                    |                        |
| 15 |                                      |                      |                                                                                                                                                                                                                                    |                        |
| 16 |                                      |                      |                                                                                                                                                                                                                                    |                        |
| 17 |                                      |                      |                                                                                                                                                                                                                                    |                        |
| 18 | Consent or assent                    | <a href="#">#26a</a> | Who will obtain informed consent or assent from potential trial participants or authorised surrogates, and how (see Item 32)                                                                                                       | 10, 15, and Appendix 1 |
| 19 |                                      |                      |                                                                                                                                                                                                                                    |                        |
| 20 |                                      |                      |                                                                                                                                                                                                                                    |                        |
| 21 |                                      |                      |                                                                                                                                                                                                                                    |                        |
| 22 |                                      |                      |                                                                                                                                                                                                                                    |                        |
| 23 |                                      |                      |                                                                                                                                                                                                                                    |                        |
| 24 | Consent or assent: ancillary studies | <a href="#">#26b</a> | Additional consent provisions for collection and use of participant data and biological specimens in ancillary studies, if applicable                                                                                              | N/A                    |
| 25 |                                      |                      |                                                                                                                                                                                                                                    |                        |
| 26 |                                      |                      |                                                                                                                                                                                                                                    |                        |
| 27 |                                      |                      |                                                                                                                                                                                                                                    |                        |
| 28 |                                      |                      |                                                                                                                                                                                                                                    |                        |
| 29 | Confidentiality                      | <a href="#">#27</a>  | How personal information about potential and enrolled participants will be collected, shared, and maintained in order to protect confidentiality before, during, and after the trial                                               | 14                     |
| 30 |                                      |                      |                                                                                                                                                                                                                                    |                        |
| 31 |                                      |                      |                                                                                                                                                                                                                                    |                        |
| 32 |                                      |                      |                                                                                                                                                                                                                                    |                        |
| 33 |                                      |                      |                                                                                                                                                                                                                                    |                        |
| 34 |                                      |                      |                                                                                                                                                                                                                                    |                        |
| 35 |                                      |                      |                                                                                                                                                                                                                                    |                        |
| 36 | Declaration of interests             | <a href="#">#28</a>  | Financial and other competing interests for principal investigators for the overall trial and each study site                                                                                                                      | 15, 21                 |
| 37 |                                      |                      |                                                                                                                                                                                                                                    |                        |
| 38 |                                      |                      |                                                                                                                                                                                                                                    |                        |
| 39 |                                      |                      |                                                                                                                                                                                                                                    |                        |
| 40 |                                      |                      |                                                                                                                                                                                                                                    |                        |
| 41 | Data access                          | <a href="#">#29</a>  | Statement of who will have access to the final trial dataset, and disclosure of contractual agreements that limit such access for investigators                                                                                    | 8 (Table 1)            |
| 42 |                                      |                      |                                                                                                                                                                                                                                    |                        |
| 43 |                                      |                      |                                                                                                                                                                                                                                    |                        |
| 44 |                                      |                      |                                                                                                                                                                                                                                    |                        |
| 45 |                                      |                      |                                                                                                                                                                                                                                    |                        |
| 46 |                                      |                      |                                                                                                                                                                                                                                    |                        |
| 47 |                                      |                      |                                                                                                                                                                                                                                    |                        |
| 48 | Ancillary and post trial care        | <a href="#">#30</a>  | Provisions, if any, for ancillary and post-trial care, and for compensation to those who suffer harm from trial participation                                                                                                      | N/A                    |
| 49 |                                      |                      |                                                                                                                                                                                                                                    |                        |
| 50 |                                      |                      |                                                                                                                                                                                                                                    |                        |
| 51 |                                      |                      |                                                                                                                                                                                                                                    |                        |
| 52 |                                      |                      |                                                                                                                                                                                                                                    |                        |
| 53 |                                      |                      |                                                                                                                                                                                                                                    |                        |
| 54 | Dissemination policy: trial results  | <a href="#">#31a</a> | Plans for investigators and sponsor to communicate trial results to participants, healthcare professionals, the public, and other relevant groups (eg, via publication, reporting in                                               | 15                     |
| 55 |                                      |                      |                                                                                                                                                                                                                                    |                        |
| 56 |                                      |                      |                                                                                                                                                                                                                                    |                        |
| 57 |                                      |                      |                                                                                                                                                                                                                                    |                        |
| 58 |                                      |                      |                                                                                                                                                                                                                                    |                        |
| 59 |                                      |                      |                                                                                                                                                                                                                                    |                        |
| 60 |                                      |                      |                                                                                                                                                                                                                                    |                        |

1 results databases, or other data sharing  
 2 arrangements), including any publication  
 3 restrictions  
 4

|    |                      |                      |                                                  |                    |
|----|----------------------|----------------------|--------------------------------------------------|--------------------|
| 5  | 3Dissemination       | <a href="#">#31b</a> | Authorship eligibility guidelines and any        | 15                 |
| 6  | policy: authorship   |                      | intended use of professional writers             |                    |
| 7  |                      |                      |                                                  |                    |
| 8  |                      |                      |                                                  |                    |
| 9  | Dissemination        | <a href="#">#31c</a> | Plans, if any, for granting public access to the | 15 and 8 (Table 1) |
| 10 | policy: reproducible |                      | full protocol, participant-level dataset, and    |                    |
| 11 | research             |                      | statistical code                                 |                    |
| 12 |                      |                      |                                                  |                    |
| 13 |                      |                      |                                                  |                    |
| 14 | Informed consent     | <a href="#">#32</a>  | Model consent form and other related             | Appendix 1         |
| 15 | materials            |                      | documentation given to participants and          |                    |
| 16 |                      |                      | authorised surrogates                            |                    |
| 17 |                      |                      |                                                  |                    |
| 18 |                      |                      |                                                  |                    |
| 19 |                      |                      |                                                  |                    |
| 20 | Biological           | <a href="#">#33</a>  | Plans for collection, laboratory evaluation, and | N/A                |
| 21 | specimens            |                      | storage of biological specimens for genetic or   |                    |
| 22 |                      |                      | molecular analysis in the current trial and for  |                    |
| 23 |                      |                      | future use in ancillary studies, if applicable   |                    |
| 24 |                      |                      |                                                  |                    |
| 25 |                      |                      |                                                  |                    |
| 26 |                      |                      |                                                  |                    |

27 The SPIRIT checklist is distributed under the terms of the Creative Commons Attribution License CC-BY-ND  
 28 3.0. This checklist can be completed online using <https://www.goodreports.org/>, a tool made by the [EQUATOR](#)  
 29 [Network](#) in collaboration with [Penelope.ai](#)  
 30

# Reporting checklist for protocol of a clinical trial (SPIRIT-PRO Elaborations only).

|                                           |                                             | SPIRIT-PRO Elaboration                                                                                                                                                                                                                                                                                                                                                                                                                                      | Page Number     |
|-------------------------------------------|---------------------------------------------|-------------------------------------------------------------------------------------------------------------------------------------------------------------------------------------------------------------------------------------------------------------------------------------------------------------------------------------------------------------------------------------------------------------------------------------------------------------|-----------------|
| 1<br>2<br>3<br>4<br>5<br>6<br>7<br>8<br>9 |                                             |                                                                                                                                                                                                                                                                                                                                                                                                                                                             |                 |
| 10                                        |                                             |                                                                                                                                                                                                                                                                                                                                                                                                                                                             |                 |
| 11                                        |                                             |                                                                                                                                                                                                                                                                                                                                                                                                                                                             |                 |
| 12                                        | Roles and responsibilities: contributorship | <a href="#">#5a</a> Specify the individual(s) responsible for the PRO content of the trial protocol.                                                                                                                                                                                                                                                                                                                                                        | 20              |
| 13                                        |                                             |                                                                                                                                                                                                                                                                                                                                                                                                                                                             |                 |
| 14                                        |                                             |                                                                                                                                                                                                                                                                                                                                                                                                                                                             |                 |
| 15                                        |                                             |                                                                                                                                                                                                                                                                                                                                                                                                                                                             |                 |
| 16                                        |                                             |                                                                                                                                                                                                                                                                                                                                                                                                                                                             |                 |
| 17                                        |                                             |                                                                                                                                                                                                                                                                                                                                                                                                                                                             |                 |
| 18                                        | Background and rationale                    | <a href="#">#6a</a> Describe the PRO-specific research question and rationale for PRO assessment and summarize PRO findings in relevant studies.                                                                                                                                                                                                                                                                                                            | 11-12           |
| 19                                        |                                             |                                                                                                                                                                                                                                                                                                                                                                                                                                                             |                 |
| 20                                        |                                             |                                                                                                                                                                                                                                                                                                                                                                                                                                                             |                 |
| 21                                        |                                             |                                                                                                                                                                                                                                                                                                                                                                                                                                                             |                 |
| 22                                        |                                             |                                                                                                                                                                                                                                                                                                                                                                                                                                                             |                 |
| 23                                        | Background and rationale                    | <a href="#">#7</a> State specific PRO objectives or hypotheses (including relevant PRO concepts/domains).                                                                                                                                                                                                                                                                                                                                                   | 11-12           |
| 24                                        |                                             |                                                                                                                                                                                                                                                                                                                                                                                                                                                             |                 |
| 25                                        |                                             |                                                                                                                                                                                                                                                                                                                                                                                                                                                             |                 |
| 26                                        |                                             |                                                                                                                                                                                                                                                                                                                                                                                                                                                             |                 |
| 27                                        | Trial Design                                | <a href="#">#10</a> Specify any PRO-specific eligibility criteria (eg, language/reading requirements or prerandomization completion of PRO). If PROs will not be collected from the entire study sample, provide a rationale and describe the method for obtaining the PRO subsample.                                                                                                                                                                       | 7 (Table 1)     |
| 28                                        |                                             |                                                                                                                                                                                                                                                                                                                                                                                                                                                             |                 |
| 29                                        |                                             |                                                                                                                                                                                                                                                                                                                                                                                                                                                             |                 |
| 30                                        |                                             |                                                                                                                                                                                                                                                                                                                                                                                                                                                             |                 |
| 31                                        |                                             |                                                                                                                                                                                                                                                                                                                                                                                                                                                             |                 |
| 32                                        |                                             |                                                                                                                                                                                                                                                                                                                                                                                                                                                             |                 |
| 33                                        |                                             |                                                                                                                                                                                                                                                                                                                                                                                                                                                             |                 |
| 34                                        |                                             |                                                                                                                                                                                                                                                                                                                                                                                                                                                             |                 |
| 35                                        |                                             |                                                                                                                                                                                                                                                                                                                                                                                                                                                             |                 |
| 36                                        |                                             |                                                                                                                                                                                                                                                                                                                                                                                                                                                             |                 |
| 37                                        | Interventions: adherence                    | <a href="#">#12</a> Identify the PRO endpoint as the primary, secondary (and if so - whether a key/important secondary), or an exploratory endpoint. Specify the PRO concepts/ domains used to evaluate the intervention (eg, overall health- related quality of life, specific domain, specific symptom) and, for each one, the analysis metric (eg, change from baseline, final value, time to event) and the principal time point or period of interest. | 11-12           |
| 38                                        |                                             |                                                                                                                                                                                                                                                                                                                                                                                                                                                             |                 |
| 39                                        |                                             |                                                                                                                                                                                                                                                                                                                                                                                                                                                             |                 |
| 40                                        |                                             |                                                                                                                                                                                                                                                                                                                                                                                                                                                             |                 |
| 41                                        |                                             |                                                                                                                                                                                                                                                                                                                                                                                                                                                             |                 |
| 42                                        |                                             |                                                                                                                                                                                                                                                                                                                                                                                                                                                             |                 |
| 43                                        |                                             |                                                                                                                                                                                                                                                                                                                                                                                                                                                             |                 |
| 44                                        |                                             |                                                                                                                                                                                                                                                                                                                                                                                                                                                             |                 |
| 45                                        |                                             |                                                                                                                                                                                                                                                                                                                                                                                                                                                             |                 |
| 46                                        |                                             |                                                                                                                                                                                                                                                                                                                                                                                                                                                             |                 |
| 47                                        |                                             |                                                                                                                                                                                                                                                                                                                                                                                                                                                             |                 |
| 48                                        |                                             |                                                                                                                                                                                                                                                                                                                                                                                                                                                             |                 |
| 49                                        |                                             |                                                                                                                                                                                                                                                                                                                                                                                                                                                             |                 |
| 50                                        |                                             |                                                                                                                                                                                                                                                                                                                                                                                                                                                             |                 |
| 51                                        | Interventions: concomitant care             | <a href="#">#13</a> Include a schedule of PRO assessments, providing a rationale for the time points, and justifying if the initial assessment is not pre-randomization. Specify time windows, whether PRO collection is prior to clinical assessments, and, if using multiple                                                                                                                                                                              | 10-11, Figure 2 |
| 52                                        |                                             |                                                                                                                                                                                                                                                                                                                                                                                                                                                             |                 |
| 53                                        |                                             |                                                                                                                                                                                                                                                                                                                                                                                                                                                             |                 |
| 54                                        |                                             |                                                                                                                                                                                                                                                                                                                                                                                                                                                             |                 |
| 55                                        |                                             |                                                                                                                                                                                                                                                                                                                                                                                                                                                             |                 |
| 56                                        |                                             |                                                                                                                                                                                                                                                                                                                                                                                                                                                             |                 |
| 57                                        |                                             |                                                                                                                                                                                                                                                                                                                                                                                                                                                             |                 |
| 58                                        |                                             |                                                                                                                                                                                                                                                                                                                                                                                                                                                             |                 |
| 59                                        |                                             |                                                                                                                                                                                                                                                                                                                                                                                                                                                             |                 |
| 60                                        |                                             |                                                                                                                                                                                                                                                                                                                                                                                                                                                             |                 |

questionnaires, whether order of administration will be standardized.

|    |                 |                           |          |
|----|-----------------|---------------------------|----------|
| 1  |                 |                           |          |
| 2  |                 |                           |          |
| 3  |                 |                           |          |
| 4  | Outcomes        | <a href="#">#14</a>       | 12       |
| 5  |                 |                           |          |
| 6  |                 |                           |          |
| 7  |                 |                           |          |
| 8  |                 |                           |          |
| 9  |                 |                           |          |
| 10 |                 |                           |          |
| 11 |                 |                           |          |
| 12 |                 |                           |          |
| 13 |                 |                           |          |
| 14 | Methods         | <a href="#">#18a(i)</a>   | 11       |
| 15 |                 |                           |          |
| 16 |                 |                           |          |
| 17 |                 |                           |          |
| 18 |                 |                           |          |
| 19 |                 |                           |          |
| 20 |                 |                           |          |
| 21 |                 |                           |          |
| 22 |                 |                           |          |
| 23 |                 |                           |          |
| 24 |                 |                           |          |
| 25 |                 |                           |          |
| 26 |                 |                           |          |
| 27 |                 |                           |          |
| 28 |                 |                           |          |
| 29 |                 |                           |          |
| 30 | Data collection | <a href="#">#18a(ii)</a>  | 8, 13-14 |
| 31 |                 |                           |          |
| 32 |                 |                           |          |
| 33 |                 |                           |          |
| 34 |                 |                           |          |
| 35 |                 |                           |          |
| 36 |                 |                           |          |
| 37 | Data collection | <a href="#">#18a(iii)</a> | 11       |
| 38 |                 |                           |          |
| 39 |                 |                           |          |
| 40 |                 |                           |          |
| 41 |                 |                           |          |
| 42 |                 |                           |          |
| 43 |                 |                           |          |
| 44 |                 |                           |          |
| 45 |                 |                           |          |
| 46 | Data collection | <a href="#">#18a(iv)</a>  | N/A      |
| 47 |                 |                           |          |
| 48 |                 |                           |          |
| 49 |                 |                           |          |
| 50 |                 |                           |          |
| 51 |                 |                           |          |
| 52 |                 |                           |          |
| 53 |                 |                           |          |
| 54 | Data collection | <a href="#">#18b(i)</a>   | 10-11    |
| 55 |                 |                           |          |
| 56 |                 |                           |          |
| 57 |                 |                           |          |
| 58 |                 |                           |          |
| 59 |                 |                           |          |
| 60 |                 |                           |          |

|    |                 |                          |                                                         |                      |
|----|-----------------|--------------------------|---------------------------------------------------------|----------------------|
| 1  | Data Collection | <a href="#">#18b(ii)</a> | Describe the process of PRO assessment for              | 10                   |
| 2  |                 |                          | participants who discontinue or deviate from the        |                      |
| 3  |                 |                          | assigned intervention protocol.                         |                      |
| 4  |                 |                          |                                                         |                      |
| 5  |                 |                          |                                                         |                      |
| 6  | Statistics      | <a href="#">#20a</a>     | State PRO analysis methods, including any plans for     | 12-13                |
| 7  |                 |                          | addressing multiplicity/type I ( $\alpha$ ) error.      |                      |
| 8  |                 |                          |                                                         |                      |
| 9  |                 |                          |                                                         |                      |
| 10 | Statistics      | <a href="#">#20c</a>     | State how missing data will be described and outline    | 12-13                |
| 11 |                 |                          | the methods for handling missing items or entire        |                      |
| 12 |                 |                          | assessments (eg, approach to imputation and             |                      |
| 13 |                 |                          | sensitivity analyses).                                  |                      |
| 14 |                 |                          |                                                         |                      |
| 15 |                 |                          |                                                         |                      |
| 16 |                 |                          |                                                         |                      |
| 17 | Data monitoring | <a href="#">#22</a>      | State whether or not PRO data will be monitored         | N/A as single dose   |
| 18 |                 |                          | during the study to inform the clinical care of         | administration study |
| 19 |                 |                          | individual trial participants and, if so, how this will |                      |
| 20 |                 |                          | be managed in a standardized way. Describe how this     |                      |
| 21 |                 |                          | process will be explained to participants; eg, in the   |                      |
| 22 |                 |                          | participant information sheet and consent form.         |                      |
| 23 |                 |                          |                                                         |                      |
| 24 |                 |                          |                                                         |                      |
| 25 |                 |                          |                                                         |                      |
| 26 |                 |                          |                                                         |                      |
| 27 |                 |                          |                                                         |                      |
| 28 |                 |                          |                                                         |                      |
| 29 |                 |                          |                                                         |                      |
| 30 |                 |                          |                                                         |                      |
| 31 |                 |                          |                                                         |                      |
| 32 |                 |                          |                                                         |                      |
| 33 |                 |                          |                                                         |                      |
| 34 |                 |                          |                                                         |                      |
| 35 |                 |                          |                                                         |                      |
| 36 |                 |                          |                                                         |                      |
| 37 |                 |                          |                                                         |                      |
| 38 |                 |                          |                                                         |                      |
| 39 |                 |                          |                                                         |                      |
| 40 |                 |                          |                                                         |                      |
| 41 |                 |                          |                                                         |                      |
| 42 |                 |                          |                                                         |                      |
| 43 |                 |                          |                                                         |                      |
| 44 |                 |                          |                                                         |                      |
| 45 |                 |                          |                                                         |                      |
| 46 |                 |                          |                                                         |                      |
| 47 |                 |                          |                                                         |                      |
| 48 |                 |                          |                                                         |                      |
| 49 |                 |                          |                                                         |                      |
| 50 |                 |                          |                                                         |                      |
| 51 |                 |                          |                                                         |                      |
| 52 |                 |                          |                                                         |                      |
| 53 |                 |                          |                                                         |                      |
| 54 |                 |                          |                                                         |                      |
| 55 |                 |                          |                                                         |                      |
| 56 |                 |                          |                                                         |                      |
| 57 |                 |                          |                                                         |                      |
| 58 |                 |                          |                                                         |                      |
| 59 |                 |                          |                                                         |                      |
| 60 |                 |                          |                                                         |                      |
