# Supplementary material for: Study protocol for two complementary trials of non-steroidal or opioid analgesia use for children aged 6 to 17 years with musculoskeletal injuries (the No OUCH study)
Source: PubMed Central journal article supplement — BMJ Open. 2020 Jun 21;10(6):e035177. doi: 10.1136/bmjopen-2019-035177 (PMC7311068; doi:10.1136/bmjopen-2019-035177), 2020-06-21
Supplement: bmjopen-2019-035177supp002.pdf [file bmjopen-2019-035177supp002.pdf]

## A study of Non-Steroidal Or Opioid Analgesia Use for Children with Musculoskeletal Injuries: The No OUCH Trials

| REB # :            | Screening ID                             | Enrolment Date               |
|--------------------|------------------------------------------|------------------------------|
| PI: Dr. Samina Ali | ____ - ____<br>(site) (screening number) | ___/___/20___<br>dd mmm yyyy |

## REDCap Forms: Summary

| Time Point / Section                          |                                                                                                                                                                                                                                                                                                         |
|-----------------------------------------------|---------------------------------------------------------------------------------------------------------------------------------------------------------------------------------------------------------------------------------------------------------------------------------------------------------|
| <b>Screening</b>                              | <ul style="list-style-type: none"> <li>➤ Pre-Screening</li> <li>➤ Eligibility</li> <li>➤ Informed Consent</li> <li>➤ Evaluation 1 (TR)</li> <li>➤ Injury Details and Previous History</li> <li>➤ Medical Oversight of Screening</li> </ul>                                                              |
| <b>T0 (Time of Study Drug Administration)</b> | <ul style="list-style-type: none"> <li>➤ Selection of Family Preference</li> <li>➤ Study Drug Administration</li> <li>➤ Evaluation 2 (T0)</li> <li>➤ Evaluation Time point Calculator (will be programmed in REDCap)</li> <li>➤ Contact Information Sheet</li> <li>➤ In PED Caregiver Survey</li> </ul> |
| <b>T30</b>                                    | <ul style="list-style-type: none"> <li>➤ Evaluation 3</li> </ul>                                                                                                                                                                                                                                        |
| <b>T60</b>                                    | <ul style="list-style-type: none"> <li>➤ Evaluation 4</li> </ul>                                                                                                                                                                                                                                        |
| <b>T90</b>                                    | <ul style="list-style-type: none"> <li>➤ Evaluation 5</li> </ul>                                                                                                                                                                                                                                        |
| <b>T120</b>                                   | <ul style="list-style-type: none"> <li>➤ Evaluation 6</li> </ul>                                                                                                                                                                                                                                        |
| <b>TME (Time of Medical Exam)</b>             | <ul style="list-style-type: none"> <li>➤ Evaluation 7</li> </ul>                                                                                                                                                                                                                                        |
| <b>TXR (Time of X-Ray)</b>                    | <ul style="list-style-type: none"> <li>➤ Evaluation 8</li> </ul>                                                                                                                                                                                                                                        |
| <b>PRE-Discharge</b>                          | <ul style="list-style-type: none"> <li>➤ ED Discharge Evaluation (only complete if discharged before 120 min)</li> <li>➤ Pre-discharge Questions (complete with ALL families)</li> </ul>                                                                                                                |
| <b>POST-Discharge</b>                         | <ul style="list-style-type: none"> <li>➤ Post-discharge Questions</li> </ul>                                                                                                                                                                                                                            |
| <b>Follow-up Survey 1 (24h)</b>               | <ul style="list-style-type: none"> <li>➤ Call Log</li> <li>➤ Follow-up Survey 1 (24h)</li> </ul>                                                                                                                                                                                                        |
| <b>Follow-up Survey 2 (1-2w)</b>              | <ul style="list-style-type: none"> <li>➤ Call Log</li> <li>➤ Follow-up Survey 1 (1-2w)</li> </ul>                                                                                                                                                                                                       |
| <b>Logs</b>                                   | <ul style="list-style-type: none"> <li>➤ Concomitant and Rescue Medications</li> <li>➤ Adverse Events</li> <li>➤ Protocol Deviations</li> <li>➤ Unanticipated Problems</li> <li>➤ Early Withdrawal Form</li> </ul>                                                                                      |

## A study of Non-Steroidal Or Opioid Analgesia Use for Children with Musculoskeletal Injuries: The No OUCH Trials

| REB # :            | Screening ID                             | Enrolment Date            |
|--------------------|------------------------------------------|---------------------------|
| PI: Dr. Samina Ali | ____ - ____<br>(site) (screening number) | __/__/20__<br>dd mmm yyyy |

## Pre-Screening (electronic SEMO Log)

|                                                         |                                                                                                                                                                                                                                                                                                                                   |                                 |
|---------------------------------------------------------|-----------------------------------------------------------------------------------------------------------------------------------------------------------------------------------------------------------------------------------------------------------------------------------------------------------------------------------|---------------------------------|
| Site                                                    | <input type="checkbox"/> Edmonton AB (1)<br><input type="checkbox"/> Calgary AB (2)<br><input type="checkbox"/> Winnipeg MB (3)<br><input type="checkbox"/> Montreal QC (4)<br><input type="checkbox"/> London ON (5)<br><input type="checkbox"/> Ottawa ON (6)                                                                   |                                 |
| Name of Research Nurse completing screening / enrolment | First and Last Name                                                                                                                                                                                                                                                                                                               |                                 |
| Date and Time of Triage                                 | ____/____/____<br>dd mmm yyyy<br>____:<br>(24 hour clock)                                                                                                                                                                                                                                                                         |                                 |
| Age                                                     | ____ years                                                                                                                                                                                                                                                                                                                        |                                 |
| Sex                                                     | <input type="checkbox"/> Male                                                                                                                                                                                                                                                                                                     | <input type="checkbox"/> Female |
| Was the family approached for this study?               | <input type="checkbox"/> Yes                                                                                                                                                                                                                                                                                                      | <input type="checkbox"/> No     |
| <u>If NO</u> , specify reason and STOP HERE.            | <input type="checkbox"/> Family refused overall consent to be approached for research<br><input type="checkbox"/> Legal guardian not present<br><input type="checkbox"/> RA busy with another study<br><input type="checkbox"/> Did not meet eligibility criteria, specify _____<br><input type="checkbox"/> Other, Specify _____ |                                 |
| <u>If YES</u> , continue to Eligibility.                |                                                                                                                                                                                                                                                                                                                                   |                                 |

## A study of Non-Steroidal Or Opioid Analgesia Use for Children with Musculoskeletal Injuries: The No OUCH Trials

| REB # :            | Screening ID                             | Enrolment Date            |
|--------------------|------------------------------------------|---------------------------|
| PI: Dr. Samina Ali | ____ - ____<br>(site) (screening number) | __/__/20__<br>dd mmm yyyy |

**Eligibility**

Was verbal consent for screening obtained from the family?  Yes  No

**Inclusion Criteria**

|                                                                                                                                                                                               |                              |                             |
|-----------------------------------------------------------------------------------------------------------------------------------------------------------------------------------------------|------------------------------|-----------------------------|
| 1. Child aged 6-17 years                                                                                                                                                                      | <input type="checkbox"/> Yes | <input type="checkbox"/> No |
| 2. Presenting to the emergency department with an acute limb injury (<24 hours old) that is neither obviously deformed nor having neuro-vascular compromise (as assessed by the triage nurse) | <input type="checkbox"/> Yes | <input type="checkbox"/> No |
| 3. Self-reported pain score $\geq 5$ on the 0 to 10 verbal Numerical Rating Scale (vNRS) at triage                                                                                            | <input type="checkbox"/> Yes | <input type="checkbox"/> No |

**Exclusion Criteria**

|                                                                                                                                   |                              |                             |
|-----------------------------------------------------------------------------------------------------------------------------------|------------------------------|-----------------------------|
| 1. Deemed to require intravenous (IV) or intranasal (IN) pain medications by the clinical team                                    | <input type="checkbox"/> Yes | <input type="checkbox"/> No |
| 2. Previously known hypersensitivity to study medications                                                                         | <input type="checkbox"/> Yes | <input type="checkbox"/> No |
| 3. Acetaminophen or non-steroidal anti-inflammatory medication (NSAID) use, within 3 hours prior to recruitment                   | <input type="checkbox"/> Yes | <input type="checkbox"/> No |
| 4. Opioid use within 1 hour prior to recruitment                                                                                  | <input type="checkbox"/> Yes | <input type="checkbox"/> No |
| 5. Caregiver and/or child cognitive impairment precluding the ability to self-report pain or respond to study questions           | <input type="checkbox"/> Yes | <input type="checkbox"/> No |
| 6. Injury suspected to be due to non-accidental trauma/ child abuse (as assessed by the triage nurse or reported by the family)   | <input type="checkbox"/> Yes | <input type="checkbox"/> No |
| 7. Suspected multi-limb fracture                                                                                                  | <input type="checkbox"/> Yes | <input type="checkbox"/> No |
| 8. Chronic pain that necessitates daily analgesic use                                                                             | <input type="checkbox"/> Yes | <input type="checkbox"/> No |
| 9. Hepatic or renal disease/dysfunction                                                                                           | <input type="checkbox"/> Yes | <input type="checkbox"/> No |
| 10. Bleeding disorder                                                                                                             | <input type="checkbox"/> Yes | <input type="checkbox"/> No |
| 11. Known pregnancy                                                                                                               | <input type="checkbox"/> Yes | <input type="checkbox"/> No |
| 12. Vomiting that precludes the ability to take oral medications (as determined by the family)                                    | <input type="checkbox"/> Yes | <input type="checkbox"/> No |
| 13. Caregiver and/or child inability to communicate fluently in English or French in the absence of a native language interpreter | <input type="checkbox"/> Yes | <input type="checkbox"/> No |
| 14. Caregiver unavailable for follow-up                                                                                           | <input type="checkbox"/> Yes | <input type="checkbox"/> No |
| 15. Previous enrollment in study                                                                                                  | <input type="checkbox"/> Yes | <input type="checkbox"/> No |

**REDCap to display if family is eligible or not based on above answers. RRN to confirm below.**

|                               |                              |                             |
|-------------------------------|------------------------------|-----------------------------|
| Is family eligible for study? | <input type="checkbox"/> Yes | <input type="checkbox"/> No |
|-------------------------------|------------------------------|-----------------------------|

## A study of Non-Steroidal Or Opioid Analgesia Use for Children with Musculoskeletal Injuries: The No OUCH Trials

| REB # :            | Screening ID                             | Enrolment Date            |
|--------------------|------------------------------------------|---------------------------|
| PI: Dr. Samina Ali | ____ - ____<br>(site) (screening number) | __/__/20__<br>dd mmm yyyy |

## Informed Consent

|                                                                                                                                                                                                                               |                                                                                                                                                  |
|-------------------------------------------------------------------------------------------------------------------------------------------------------------------------------------------------------------------------------|--------------------------------------------------------------------------------------------------------------------------------------------------|
| Has written informed consent been obtained?                                                                                                                                                                                   | <input type="checkbox"/> Yes<br><input type="checkbox"/> No                                                                                      |
| <b>If NO</b> , specify reason and STOP HERE.                                                                                                                                                                                  | <input type="checkbox"/> Declined consent<br><input type="checkbox"/> Declined assent<br><input type="checkbox"/> Other, please specify<br>_____ |
| <b>If YES</b> , specify the date and time of Informed Consent:                                                                                                                                                                | ____/____/____<br>dd mmm yyyy<br>____:<br>(24 hour clock)                                                                                        |
| Has a copy of the signed informed consent been given to the family?                                                                                                                                                           | <input type="checkbox"/> Yes<br><input type="checkbox"/> No                                                                                      |
| <i>If no, specify reason:</i>                                                                                                                                                                                                 |                                                                                                                                                  |
| Has written assent been obtained?                                                                                                                                                                                             | <input type="checkbox"/> Yes<br><input type="checkbox"/> No<br><input type="checkbox"/> No, but verbal assent was obtained and documented        |
| <i>If no, specify reason and STOP HERE.</i>                                                                                                                                                                                   |                                                                                                                                                  |
| Has a copy of the signed assent been given to the family?                                                                                                                                                                     | <input type="checkbox"/> Yes<br><input type="checkbox"/> No                                                                                      |
| <i>If no, specify reason:</i>                                                                                                                                                                                                 |                                                                                                                                                  |
| Permission to contact for future studies?                                                                                                                                                                                     | <input type="checkbox"/> Yes<br><input type="checkbox"/> No                                                                                      |
| [Stollery Site ONLY] Would you be interested in being contacted, later, about a second related study? We want to better understand how parents make medical decisions for their children when they are injured and have pain. | <input type="checkbox"/> Yes<br><input type="checkbox"/> No                                                                                      |

**If ALL the inclusion and exclusion criteria are met AND written consent and assent have been obtained, please proceed.**

**If NOT, please STOP here.**

## A study of Non-Steroidal Or Opioid Analgesia Use for Children with Musculoskeletal Injuries: The No OUCH Trials

| REB # :            | Screening ID                             | Enrolment Date            |
|--------------------|------------------------------------------|---------------------------|
| PI: Dr. Samina Ali | ____ - ____<br>(site) (screening number) | __/__/20__<br>dd mmm yyyy |

## Evaluation # 1 (TR – Recruitment)

|                                                                                                                                                                                                                                                                                                                                                                                                                                                                                                                                                                                                                                                                                                                                |                                                                                                                                                                                                           |
|--------------------------------------------------------------------------------------------------------------------------------------------------------------------------------------------------------------------------------------------------------------------------------------------------------------------------------------------------------------------------------------------------------------------------------------------------------------------------------------------------------------------------------------------------------------------------------------------------------------------------------------------------------------------------------------------------------------------------------|-----------------------------------------------------------------------------------------------------------------------------------------------------------------------------------------------------------|
| Was this evaluation completed?                                                                                                                                                                                                                                                                                                                                                                                                                                                                                                                                                                                                                                                                                                 | <input type="checkbox"/> Yes <input type="checkbox"/> No                                                                                                                                                  |
| If Yes, continue. If No, specify reason:                                                                                                                                                                                                                                                                                                                                                                                                                                                                                                                                                                                                                                                                                       |                                                                                                                                                                                                           |
| <u>Date and Time of evaluation # 1:</u>                                                                                                                                                                                                                                                                                                                                                                                                                                                                                                                                                                                                                                                                                        | ____/____/____<br>dd mmm yyyy<br>____:<br>(24 hour clock)                                                                                                                                                 |
| <u>Vital Signs:</u><br><br><i>Record triage vital signs here. Please measure a new set of vital signs if triage time is ≥60 minutes from time of recruitment.</i>                                                                                                                                                                                                                                                                                                                                                                                                                                                                                                                                                              | HR: _____ bpm<br>RR: _____ rpm<br>Sat: _____ %<br>BP: _____ / _____ mmHg                                                                                                                                  |
| <u>Pain Scores:</u><br><br><b>vNRS</b><br>“On a scale of 0 to 10, where 0 is no pain and 10 is the worst pain you can imagine, what is your pain level now?”<br><br><b>VAS</b><br>“What is your pain level on this sliding scale, where 0 means absence of pain and 100 is the worst pain you have ever experienced?”<br><br><b>FPS-R</b><br>“These faces show how much something can hurt. This face (point to left most face) shows no pain. The faces show more and more pain (point from left to right) up to this one (point to right most face) – it shows very much pain. Can you point to the face that shows how much you hurt right now?”<br>Note: say “hurt” or “pain” whichever seems right for a particular child | _____/10<br><br>_____/100 mm<br><br><input type="checkbox"/> 0 <input type="checkbox"/> 2 <input type="checkbox"/> 4<br><input type="checkbox"/> 6 <input type="checkbox"/> 8 <input type="checkbox"/> 10 |

## A study of Non-Steroidal Or Opioid Analgesia Use for Children with Musculoskeletal Injuries: The No OUCH Trials

| REB # :            | Screening ID                             | Enrolment Date                      |
|--------------------|------------------------------------------|-------------------------------------|
| PI: Dr. Samina Ali | ____ - ____<br>(site) (screening number) | ____ / ____ / 20____<br>dd mmm yyyy |

## Injury Details and Previous History

|                                 |                                                          |
|---------------------------------|----------------------------------------------------------|
| <u>Date and Time of Injury:</u> | ____ / ____ / ____ : ____<br>dd mmm yyyy (24 hour clock) |
|---------------------------------|----------------------------------------------------------|

| <u>Location of Primary Injury:</u><br>Please select the location of the PRIMARY injury (pick ONE only)                                                                                                                                                                                                                          |                                                                                                                                                                                                                                                                               |
|---------------------------------------------------------------------------------------------------------------------------------------------------------------------------------------------------------------------------------------------------------------------------------------------------------------------------------|-------------------------------------------------------------------------------------------------------------------------------------------------------------------------------------------------------------------------------------------------------------------------------|
| <input type="checkbox"/> Single or Multiple Fingers (if ONLY injury)<br><input type="checkbox"/> Hand<br><input type="checkbox"/> Wrist<br><input type="checkbox"/> Forearm<br><input type="checkbox"/> Elbow<br><input type="checkbox"/> Upper Arm<br><input type="checkbox"/> Shoulder<br><input type="checkbox"/> Collarbone | <input type="checkbox"/> Single or Multiple Toes (if ONLY injury)<br><input type="checkbox"/> Foot<br><input type="checkbox"/> Ankle<br><input type="checkbox"/> Lower leg<br><input type="checkbox"/> Knee<br><input type="checkbox"/> Thigh<br><input type="checkbox"/> Hip |

| <u>Concomitant Digit Injury:</u>                                                   |                                                                                                         |
|------------------------------------------------------------------------------------|---------------------------------------------------------------------------------------------------------|
| Is there a concomitant digit injury present <b><u>on the same limb?</u></b>        | <input type="checkbox"/> Yes<br><input type="checkbox"/> No                                             |
| <u>If yes</u> , please select the location of the secondary injury (pick ONE only) | <input type="checkbox"/> Single or Multiple fingers<br><input type="checkbox"/> Single or Multiple toes |

| <u>Concomitant Medications</u>                    |                                                                                                      |
|---------------------------------------------------|------------------------------------------------------------------------------------------------------|
| Have any medications been given since the injury? | <input type="checkbox"/> Yes – (Fill out Concomitant Medication Form)<br><input type="checkbox"/> No |

## A study of Non-Steroidal Or Opioid Analgesia Use for Children with Musculoskeletal Injuries: The No OUCH Trials

| REB # :            | Screening ID                             | Enrolment Date                      |
|--------------------|------------------------------------------|-------------------------------------|
| PI: Dr. Samina Ali | ____ - ____<br>(site) (screening number) | ____ / ____ / 20____<br>dd mmm yyyy |

## Medical Oversight of Screening

|                                                                                                                    |                                                                                                                                                                                                                                                                                                                            |
|--------------------------------------------------------------------------------------------------------------------|----------------------------------------------------------------------------------------------------------------------------------------------------------------------------------------------------------------------------------------------------------------------------------------------------------------------------|
| Eligibility of the participant has been confirmed by:                                                              | <input type="checkbox"/> PI / Site Investigator (in person)<br><input type="checkbox"/> PI / Site Investigator (by phone)<br><input type="checkbox"/> Third party physician<br><small>Purpose: to review the inclusion and exclusion criteria on this form and confirm that the patient meets the criteria listed.</small> |
| If PI/ Site Investigator, specify:<br>PI / Site Investigator Physician Name:<br><br>Date and time of confirmation: | _____<br><br>____ / ____ / ____ : ____<br>dd mmm yyyy (24 hour clock)                                                                                                                                                                                                                                                      |
| If Third party physician, specify:<br>Third party Physician Name:<br><br>Date and time of confirmation:            | _____<br><br>____ / ____ / ____ : ____<br>dd mmm yyyy (24 hour clock)                                                                                                                                                                                                                                                      |

## A study of Non-Steroidal Or Opioid Analgesia Use for Children with Musculoskeletal Injuries: The No OUCH Trials

| REB # :            | Screening ID                              | Enrolment Date            |
|--------------------|-------------------------------------------|---------------------------|
| PI: Dr. Samina Ali | ____ - _____<br>(site) (screening number) | __/__/20__<br>dd mmm yyyy |

## Selection of Family Preference

To Caregiver and Child: "At this point, we need you to tell us which study group you would like to participate in: Group 1 or Group 2. Regardless of which study you choose, you / your child will, at minimum, receive ibuprofen (Advil) for their pain. Both groups include commonly used pain medicines for this type of pain, however Group 2 includes all three of the pain medicine options offered in this study. So, if you don't have a preference, we will assign you to Group 2.

- If you choose Group 2, you/your child will have an equal chance of receiving **either**:
  - Ibuprofen (Advil) AND placebos (inactive ingredient)
  - Ibuprofen (Advil) AND acetaminophen (Tylenol)
  - Ibuprofen (Advil) AND hydromorphone (Dilaudid)
- If you choose Group 1, you/your child will have an equal chance of receiving **either**:
  - Ibuprofen (Advil) AND placebo (inactive ingredient)
  - Ibuprofen (Advil) AND acetaminophen (Tylenol)

To help you in making your choice, here is some more information about these medicines.

1. Ibuprofen (Advil) is typically provided for the kind of injury you/your child has, but it may not always be strong enough to treat a child's pain.
  2. When a child needs something stronger than ibuprofen (Advil) for their pain, acetaminophen (Tylenol) and opioid medicines like hydromorphone (Dilaudid) are the most commonly recommended pain killers to be added to the ibuprofen.
  3. Please remember that if you feel that you/your child needs more pain medicine at any point during the study period, you or our research nurse can let your doctor know right away.
- Which study would you like to be a part of: Group 1 or Group 2?
  - [NOTE: If the family wishes to speak to a health care professional prior to making their study choice, the RA will then identify a clinical team member to aid them.]

Indicate family preference below:

- Group 1**: Non-Opioid trial [N]
- Group 2**: Opioid trial [O]
- No preference → Proceed to enroll in  **Group 2**: Opioid trial [O]
- Family unable to reach consensus regarding preference. [If this is chosen, STOP enrolment now]



**A study of Non-Steroidal Or Opioid Analgesia Use for Children with Musculoskeletal Injuries: The No OUCH Trials**

| REB # :            | Screening ID                             | Enrolment Date                |
|--------------------|------------------------------------------|-------------------------------|
| PI: Dr. Samina Ali | ____ - ____<br>(site) (screening number) | __ / __ / 20__<br>dd mmm yyyy |

Once the **Preference Group** has been selected by the family, please retrieve the following study medication kit from your medication dispensing area:

|                                                                                                             |
|-------------------------------------------------------------------------------------------------------------|
| <p><b>Pharmacy Kit Number:</b></p> <p>____ - ____ - ____<br/>(site - preference group - patient number)</p> |
|-------------------------------------------------------------------------------------------------------------|

## A study of Non-Steroidal Or Opioid Analgesia Use for Children with Musculoskeletal Injuries: The No OUCH Trials

| REB # :            | Study ID                                                         | Enrolment Date                      |
|--------------------|------------------------------------------------------------------|-------------------------------------|
| PI: Dr. Samina Ali | ____ - ____ - ____<br>(site - preference group - patient number) | ____ / ____ / 20____<br>dd mmm yyyy |

## Study Drugs Administration

|                                                                                                        |                                                                                                                                                                                                          |
|--------------------------------------------------------------------------------------------------------|----------------------------------------------------------------------------------------------------------------------------------------------------------------------------------------------------------|
| Confirmed that the pharmacy kit is not expired?                                                        | <input type="checkbox"/> Yes<br><input type="checkbox"/> No* If <b>"NO"</b> , check before proceeding                                                                                                    |
| Are the noted min. and max. temperatures of the drug storage fridge within the required ranges, today? | <input type="checkbox"/> Yes<br><input type="checkbox"/> No* If <b>"NO"</b> , check temperatures before proceeding                                                                                       |
| Weight:                                                                                                | _____ kg<br><input type="checkbox"/> Measured on scale<br><input type="checkbox"/> Estimate provided by parent                                                                                           |
| <b>Ibuprofen (40mg/ml)</b><br>(up to <b>600 mg</b> maximum – <b>15 ml</b> maximum)                     | <b>Dose: 10 mg per kg</b><br>Calculation: _____ kg x 10 = _____ mg<br><b>Volume: 40mg = 1 ml</b><br>Calculation: _____ mg ÷ 40mg/ml = _____ ml<br><b>Volume actually dispensed to patient: _____ ml</b>  |
| <b>Acetaminophen or Placebo (80mg/ml)</b><br>(up to <b>1000 mg</b> maximum – <b>12.5 ml</b> maximum)   | <b>Dose: 15 mg per kg</b><br>Calculation: _____ kg x 15 = _____ mg<br><b>Volume: 80mg = 1 ml</b><br>Calculation: _____ mg ÷ 80 mg/kg = _____ ml<br><b>Volume actually dispensed to patient: _____ ml</b> |

## A study of Non-Steroidal Or Opioid Analgesia Use for Children with Musculoskeletal Injuries: The No OUCH Trials

| REB # :            | Study ID                                                         | Enrolment Date                      |
|--------------------|------------------------------------------------------------------|-------------------------------------|
| PI: Dr. Samina Ali | ____ - ____ - ____<br>(site - preference group - patient number) | ____ / ____ / 20____<br>dd mmm yyyy |

|                                                                                                                                                                        |                                                                                                                                                                                                                        |
|------------------------------------------------------------------------------------------------------------------------------------------------------------------------|------------------------------------------------------------------------------------------------------------------------------------------------------------------------------------------------------------------------|
| <b>Hydromorphone or Placebo (1mg/ml)</b><br><b>(up to 5 mg maximum – 5 ml maximum)</b><br><br><b>ONLY for participants enrolled in Group 2:</b><br><b>Opioid trial</b> | <b>Dose: 0.05 mg per kg</b><br><br>Calculation: ____ kg x 0.05 = ____ mg<br><br><b>Volume: 1 mg = 1 ml</b><br><br>Calculation: ____ mg ÷ 1 mg/ml = ____ ml<br><br><b>Volume actually dispensed to patient: ____ ml</b> |
| *Dose calculation and dispensing in syringe must be verified by a second nurse:                                                                                        | Verified by:<br>_____                                                                                                                                                                                                  |
| Date and time of study drugs administration:                                                                                                                           | ____ / ____ / ____<br>dd mmm yyyy<br><br>____ : ____<br>(24 hour clock)                                                                                                                                                |
| Has the participant taken the full dose of each syringe?                                                                                                               | <input type="checkbox"/> Yes <input type="checkbox"/> No* If " <b>NO</b> ", please comment                                                                                                                             |
| Were all study drugs administered one after the other?                                                                                                                 | <input type="checkbox"/> Yes <input type="checkbox"/> No* If " <b>NO</b> ", please comment                                                                                                                             |
| Was dispensing of the study drugs recorded on the patient's clinical chart?                                                                                            | <input type="checkbox"/> Yes <input type="checkbox"/> No* If " <b>NO</b> ", please comment                                                                                                                             |
| <u>Comments:</u><br><br>                                                                                                                                               |                                                                                                                                                                                                                        |

## A study of Non-Steroidal Or Opioid Analgesia Use for Children with Musculoskeletal Injuries: The No OUCH Trials

| REB # :            | Study ID                                                                | Enrolment Date                      |
|--------------------|-------------------------------------------------------------------------|-------------------------------------|
| PI: Dr. Samina Ali | ____ - ____ - ____ - ____<br>(site - preference group - patient number) | ____ / ____ / 20____<br>dd mmm yyyy |

## Evaluation # 2 (T0 – Immediately after Study Drug Administration)

Time due: dd/ mmm/ yyyy HH:MM ± 10 min

|                                                                                                                                                                                                                                                                                                                                                                                                                                                                                                                                                                                                                                                                                                                                                           |                                                                                                                                                                                                                          |
|-----------------------------------------------------------------------------------------------------------------------------------------------------------------------------------------------------------------------------------------------------------------------------------------------------------------------------------------------------------------------------------------------------------------------------------------------------------------------------------------------------------------------------------------------------------------------------------------------------------------------------------------------------------------------------------------------------------------------------------------------------------|--------------------------------------------------------------------------------------------------------------------------------------------------------------------------------------------------------------------------|
| Was this evaluation completed?                                                                                                                                                                                                                                                                                                                                                                                                                                                                                                                                                                                                                                                                                                                            | <input type="checkbox"/> Yes <input type="checkbox"/> No                                                                                                                                                                 |
| If Yes, continue. If No, specify reason:                                                                                                                                                                                                                                                                                                                                                                                                                                                                                                                                                                                                                                                                                                                  |                                                                                                                                                                                                                          |
| <u>Date and Time of evaluation # 2:</u>                                                                                                                                                                                                                                                                                                                                                                                                                                                                                                                                                                                                                                                                                                                   | ____ / ____ / ____<br>dd mmm yyyy<br>____ : ____<br>(24 hour clock)                                                                                                                                                      |
| <u>Pain and Sedation Scores:</u><br><b>vNRS</b><br>“On a scale of 0 to 10, where 0 is no pain and 10 is the worst pain you can imagine, what is your pain level now?”<br><br><b>VAS</b><br>“What is your pain level on this sliding scale, where 0 means absence of pain and 100 is the worst pain you have ever experienced?”<br><br><b>FPS-R</b><br>“These faces show how much something can hurt. This face (point to left most face) shows no pain. The faces show more and more pain (point from left to right) up to this one (point to right most face) – it shows very much pain. Can you point to the face that shows how much you hurt right now?”<br>Note: say “hurt” or “pain” whichever seems right for a particular child<br><br><b>RSS</b> | ____ /10<br><br>____ /100 mm<br><br><input type="checkbox"/> 0 <input type="checkbox"/> 2 <input type="checkbox"/> 4<br><input type="checkbox"/> 6 <input type="checkbox"/> 8 <input type="checkbox"/> 10<br><br>____ /6 |

## A study of Non-Steroidal Or Opioid Analgesia Use for Children with Musculoskeletal Injuries: The No OUCH Trials

| REB # :            | Study ID                                                         | Enrolment Date                      |
|--------------------|------------------------------------------------------------------|-------------------------------------|
| PI: Dr. Samina Ali | ____ - ____ - ____<br>(site - preference group - patient number) | ____ / ____ / 20____<br>dd mmm yyyy |

## Contact Information Sheet

|                                   |                                                                           |                    |
|-----------------------------------|---------------------------------------------------------------------------|--------------------|
| <b>Child's Name:</b>              | _____<br>First name                                                       | _____<br>Last name |
| <b>Age:</b>                       | _____ years                                                               |                    |
| <b>Sex:</b>                       | <input type="checkbox"/> Male <input type="checkbox"/> Female             |                    |
| <b>Caregiver's Name:</b>          | _____<br>First name                                                       | _____<br>Last name |
|                                   | Specify relationship to child: _____                                      |                    |
| <b>Preferred Mode of Contact:</b> | <input type="checkbox"/> Email <input type="checkbox"/> Phone             |                    |
| <b>Email:</b>                     | _____                                                                     |                    |
| <b>Preferred Phone Number:</b>    | ( _____ ) _____ - _____                                                   |                    |
| <b>Alternate Phone Number:</b>    | ( _____ ) _____ - _____                                                   |                    |
| <b>Time for follow up call:</b>   | <input type="checkbox"/> AM <input type="checkbox"/> PM    Specify: _____ |                    |

## A study of Non-Steroidal Or Opioid Analgesia Use for Children with Musculoskeletal Injuries: The No OUCH Trials

| REB # :            | Study ID                                                         | Enrolment Date                      |
|--------------------|------------------------------------------------------------------|-------------------------------------|
| PI: Dr. Samina Ali | ____ - ____ - ____<br>(site - preference group - patient number) | ____ / ____ / 20____<br>dd mmm yyyy |

## In PED Caregiver Survey

| Your Information                                               |                                                                                                                                                                                                                                                                                                                            |
|----------------------------------------------------------------|----------------------------------------------------------------------------------------------------------------------------------------------------------------------------------------------------------------------------------------------------------------------------------------------------------------------------|
| What is YOUR age, in years?                                    | _____ years                                                                                                                                                                                                                                                                                                                |
| What is YOUR sex?                                              | <input type="checkbox"/> Male<br><input type="checkbox"/> Female<br><input type="checkbox"/> Other, specify: _____<br><input type="checkbox"/> Decline to answer                                                                                                                                                           |
| What is your home postal code? (1 <sup>st</sup> 3 digits only) | ____                                                                                                                                                                                                                                                                                                                       |
| What is your highest level of Education?                       | <input type="checkbox"/> Elementary School<br><input type="checkbox"/> High School or some High School<br><input type="checkbox"/> Diploma/Certificate<br><input type="checkbox"/> Some Post-Secondary/University<br><input type="checkbox"/> University/Professional Degree<br><input type="checkbox"/> Decline to answer |
| What is your annual household income from all sources?         | <input type="checkbox"/> Less than or equal to \$25,000<br><input type="checkbox"/> \$25,001 to \$50,000<br><input type="checkbox"/> \$50,001 to \$75,000<br><input type="checkbox"/> \$75,000 to \$100,000<br><input type="checkbox"/> Greater than \$100,000<br><input type="checkbox"/> Decline to answer               |

| Injury Details                     |                                                                                                                                                                                                                                                                                                                                                                                                                                                                                                                                                                                                                                                           |
|------------------------------------|-----------------------------------------------------------------------------------------------------------------------------------------------------------------------------------------------------------------------------------------------------------------------------------------------------------------------------------------------------------------------------------------------------------------------------------------------------------------------------------------------------------------------------------------------------------------------------------------------------------------------------------------------------------|
| How did your child's injury occur? | <input type="checkbox"/> Motor Vehicle Collision/ Road Traffic Accident<br><input type="checkbox"/> Sports Injury <ul style="list-style-type: none"> <li><input type="checkbox"/> Ice Hockey/ Hockey</li> <li><input type="checkbox"/> Football</li> <li><input type="checkbox"/> Soccer</li> <li><input type="checkbox"/> Wrestling</li> <li><input type="checkbox"/> Basketball</li> <li><input type="checkbox"/> Gymnastics/ Cheerleading</li> <li><input type="checkbox"/> Skiing/ Snowboarding</li> <li><input type="checkbox"/> Biking</li> <li><input type="checkbox"/> Other sport, specify: _____</li> </ul> <input type="checkbox"/> Trampoline |

## A study of Non-Steroidal Or Opioid Analgesia Use for Children with Musculoskeletal Injuries: The No OUCH Trials

| REB # :            | Study ID                                                            | Enrolment Date               |
|--------------------|---------------------------------------------------------------------|------------------------------|
| PI: Dr. Samina Ali | _____ - _____ - _____<br>(site - preference group - patient number) | ___/___/20___<br>dd mmm yyyy |

|                                                                                                        |                                                                                                                                                                                                                                                                                              |
|--------------------------------------------------------------------------------------------------------|----------------------------------------------------------------------------------------------------------------------------------------------------------------------------------------------------------------------------------------------------------------------------------------------|
|                                                                                                        | <input type="checkbox"/> Other play or activity<br><input type="checkbox"/> Other Slip, Trip or Fall<br><input type="checkbox"/> Other mechanism, specify: _____                                                                                                                             |
| Was the sports, play or activity supervised (ie. Were you or another adult there watching your child)? | <input type="checkbox"/> Yes<br><input type="checkbox"/> No<br><input type="checkbox"/> Unsure                                                                                                                                                                                               |
| Where did your child's injury occur?                                                                   | <input type="checkbox"/> Sports Field/ Arena<br><input type="checkbox"/> In School/ School playground<br><input type="checkbox"/> Playground/ Park<br><input type="checkbox"/> Home/ Friend's home<br><input type="checkbox"/> Road<br><input type="checkbox"/> Other, please specify: _____ |

| Study Preference                                                                                                                                                                                                                                                                                                                                                                       |                                                                                                                                                                                                                                                                                                                                                                                                                                                                                                                                                                                                                                                                                                           |
|----------------------------------------------------------------------------------------------------------------------------------------------------------------------------------------------------------------------------------------------------------------------------------------------------------------------------------------------------------------------------------------|-----------------------------------------------------------------------------------------------------------------------------------------------------------------------------------------------------------------------------------------------------------------------------------------------------------------------------------------------------------------------------------------------------------------------------------------------------------------------------------------------------------------------------------------------------------------------------------------------------------------------------------------------------------------------------------------------------------|
| <p>If they chose the Non-Opioid trial (Group 1):</p> <p>Please tell us your reason(s) for choosing <b>Group 1</b>, ie. the study with the possibility of receiving one of the following:</p> <ul style="list-style-type: none"> <li>○ Ibuprofen only (Advil)</li> <li>○ Ibuprofen (Advil) and Acetaminophen (Tylenol)</li> </ul> <p>Choose all that apply</p>                          | <input type="checkbox"/> I do not believe my child's pain is/ will be severe enough to require an opioid medicine (Hydromorphone/ Dilaudid)<br><input type="checkbox"/> I did not want my child to receive an opioid medicine<br><input type="checkbox"/> I do not think my child is old enough to receive an opioid medicine<br><input type="checkbox"/> I trust that both medicines in this study would work for my child, with their current level of pain<br><input type="checkbox"/> I think my child will get better care if they are a part of this study (ex. they will get treated faster, get close care from the research nurse etc.)<br><input type="checkbox"/> Other, please specify: _____ |
| <p>If they chose the Opioid trial (Group 2):</p> <p>Please tell us your reason(s) for choosing <b>Group 2</b>, ie. the study with the possibility of receiving one of the following:</p> <ul style="list-style-type: none"> <li>○ Ibuprofen only (Advil)</li> <li>○ Ibuprofen (Advil) and Acetaminophen (Tylenol)</li> <li>○ Ibuprofen (Advil) and Hydromorphone (Dilaudid)</li> </ul> | <input type="checkbox"/> I wanted to have the option of all 3 medicines, or combination of medicines, available to us<br><input type="checkbox"/> I wanted/hoped that my child will receive the opioid medicine (Hydromorphone/ Dilaudid) specifically<br><input type="checkbox"/> I believe that my child's pain is/ will be severe enough to require an opioid medicine<br><input type="checkbox"/> I believe that the pain relief benefits of the opioid medicine are greater than any possible side effects<br><input type="checkbox"/> I trust that any of the 3 options in this study would work for my child, with their current level of pain                                                     |

## A study of Non-Steroidal Or Opioid Analgesia Use for Children with Musculoskeletal Injuries: The No OUCH Trials

| REB # :            | Study ID                                                            | Enrolment Date                   |
|--------------------|---------------------------------------------------------------------|----------------------------------|
| PI: Dr. Samina Ali | _____ - _____ - _____<br>(site - preference group - patient number) | ___ / ___ / 20___<br>dd mmm yyyy |

|                       |                                                                                                                                                                                                                                                                                                                                                                                                                        |
|-----------------------|------------------------------------------------------------------------------------------------------------------------------------------------------------------------------------------------------------------------------------------------------------------------------------------------------------------------------------------------------------------------------------------------------------------------|
| Choose all that apply | <input type="checkbox"/> I think my child will get better care if they are a part of this study (ex. they will get treated faster, get close care from the research nurse etc.)<br><input type="checkbox"/> Participating in this study will help researchers learn more about the use of opioids for treating injury-related pain for children in the future<br><input type="checkbox"/> Other, please specify: _____ |
|-----------------------|------------------------------------------------------------------------------------------------------------------------------------------------------------------------------------------------------------------------------------------------------------------------------------------------------------------------------------------------------------------------------------------------------------------------|

| Experience with Opioid Pain Medicines                                                                                                                                                                                                                                |                                                                                                                                              |
|----------------------------------------------------------------------------------------------------------------------------------------------------------------------------------------------------------------------------------------------------------------------|----------------------------------------------------------------------------------------------------------------------------------------------|
| Have YOU ever been prescribed or given an opioid medicine by a health care provider, in a clinic or hospital?<br><br><i>Ex. Hydromorphone (Dilaudid), Morphine, Oxycodone (OxyContin, Percocet), Codeine, Fentanyl, Hydrocodone (Vicodin)</i>                        | <input type="checkbox"/> Yes<br><input type="checkbox"/> No<br><input type="checkbox"/> Unsure                                               |
| Have any of your FAMILY MEMBERS ever been prescribed or given an opioid medicine by a health care provider, in a clinic or hospital?<br><br><i>Ex. Hydromorphone (Dilaudid), Morphine, Oxycodone (OxyContin, Percocet), Codeine, Fentanyl, Hydrocodone (Vicodin)</i> | <input type="checkbox"/> Yes<br><input type="checkbox"/> No<br><input type="checkbox"/> Unsure                                               |
| If yes, was this family member a CHILD?                                                                                                                                                                                                                              | <input type="checkbox"/> Yes<br><input type="checkbox"/> No<br><input type="checkbox"/> Decline to Answer                                    |
| Have you or a family member ever been diagnosed with a substance use disorder, or addiction to drugs/ alcohol?                                                                                                                                                       | <input type="checkbox"/> Yes<br><input type="checkbox"/> No<br><input type="checkbox"/> Unsure<br><input type="checkbox"/> Decline to answer |
| If yes, can you please specify which drug(s)/ substances?                                                                                                                                                                                                            | [Free text]                                                                                                                                  |



## A study of Non-Steroidal Or Opioid Analgesia Use for Children with Musculoskeletal Injuries: The No OUCH Trials

| REB # :            | Study ID                                                         | Enrolment Date                      |
|--------------------|------------------------------------------------------------------|-------------------------------------|
| PI: Dr. Samina Ali | ____ - ____ - ____<br>(site - preference group - patient number) | ____ / ____ / 20____<br>dd mmm yyyy |

## Evaluation # 3 (T30 – 30 minutes after study drugs administration)

Time due: dd/ mmm/ yyyy HH:MM ± 15 min

|                                                                                                                                                                                                                                                                                                                                                                                                                                                                                                                                                                                                                                                                                                                                               |                                                                                                                                                                                                              |
|-----------------------------------------------------------------------------------------------------------------------------------------------------------------------------------------------------------------------------------------------------------------------------------------------------------------------------------------------------------------------------------------------------------------------------------------------------------------------------------------------------------------------------------------------------------------------------------------------------------------------------------------------------------------------------------------------------------------------------------------------|--------------------------------------------------------------------------------------------------------------------------------------------------------------------------------------------------------------|
| Was this evaluation completed?                                                                                                                                                                                                                                                                                                                                                                                                                                                                                                                                                                                                                                                                                                                | <input type="checkbox"/> Yes <input type="checkbox"/> No                                                                                                                                                     |
| If Yes, continue. If No, specify reason:                                                                                                                                                                                                                                                                                                                                                                                                                                                                                                                                                                                                                                                                                                      | <input type="checkbox"/> Patient discharged before specified evaluation time<br><input type="checkbox"/> Other: _____                                                                                        |
| <u>Date and Time of evaluation # 3:</u>                                                                                                                                                                                                                                                                                                                                                                                                                                                                                                                                                                                                                                                                                                       | ____ / ____ / ____<br>dd mmm yyyy<br>____ : ____<br>(24 hour clock)                                                                                                                                          |
| <u>Vital Signs:</u>                                                                                                                                                                                                                                                                                                                                                                                                                                                                                                                                                                                                                                                                                                                           | HR: _____ bpm<br>RR: _____ rpm<br>Sat: _____ %<br>BP: ____ / ____ mmHg                                                                                                                                       |
| <u>Pain and Sedation Scores:</u><br><b>vNRS</b><br>"On a scale of 0 to 10, where 0 is no pain and 10 is the worst pain you can imagine, what is your pain level now?"<br><b>VAS</b><br>"What is your pain level on this sliding scale, where 0 means absence of pain and 100 is the worst pain you have ever experienced?"<br><b>FPS-R</b><br>"These faces show how much something can hurt. This face (point to left most face) shows no pain. The faces show more and more pain (point from left to right) up to this one (point to right most face) – it shows very much pain. Can you point to the face that shows how much you hurt right now?"<br>Note: say "hurt" or "pain" whichever seems right for a particular child<br><b>RSS</b> | _____/10<br>_____/100 mm<br><input type="checkbox"/> 0 <input type="checkbox"/> 2 <input type="checkbox"/> 4<br><input type="checkbox"/> 6 <input type="checkbox"/> 8 <input type="checkbox"/> 10<br>_____/6 |
| <u>Any adverse events or side effects?</u><br>If "YES", complete a separate entry for each AE on the AE Form. Do not suggest any AEs to the participant; let him/ her answer spontaneously.                                                                                                                                                                                                                                                                                                                                                                                                                                                                                                                                                   | <input type="checkbox"/> Yes – (Fill out Adverse Events Form)<br><input type="checkbox"/> No                                                                                                                 |

## A study of Non-Steroidal Or Opioid Analgesia Use for Children with Musculoskeletal Injuries: The No OUCH Trials

| REB # :            | Study ID                                                         | Enrolment Date                      |
|--------------------|------------------------------------------------------------------|-------------------------------------|
| PI: Dr. Samina Ali | ____ - ____ - ____<br>(site - preference group - patient number) | ____ / ____ / 20____<br>dd mmm yyyy |

## Evaluation # 4 (T60 – 60 minutes after study drugs administration)

Time due: dd/ mmm/ yyyy HH:MM ± 15 min

|                                                                                                                                                                                                                                                                                                                                                                                                                                                                                                                                                                                                                                                                                                                                               |                                                                                                                                                                                                              |
|-----------------------------------------------------------------------------------------------------------------------------------------------------------------------------------------------------------------------------------------------------------------------------------------------------------------------------------------------------------------------------------------------------------------------------------------------------------------------------------------------------------------------------------------------------------------------------------------------------------------------------------------------------------------------------------------------------------------------------------------------|--------------------------------------------------------------------------------------------------------------------------------------------------------------------------------------------------------------|
| Was this evaluation completed?                                                                                                                                                                                                                                                                                                                                                                                                                                                                                                                                                                                                                                                                                                                | <input type="checkbox"/> Yes <input type="checkbox"/> No                                                                                                                                                     |
| If Yes, continue. If No, specify reason:                                                                                                                                                                                                                                                                                                                                                                                                                                                                                                                                                                                                                                                                                                      | <input type="checkbox"/> Patient discharged before specified evaluation time<br><input type="checkbox"/> Other: _____                                                                                        |
| <u>Date and Time of evaluation # 4:</u>                                                                                                                                                                                                                                                                                                                                                                                                                                                                                                                                                                                                                                                                                                       | ____ / ____ / ____<br>dd mmm yyyy<br>____ : ____<br>(24 hour clock)                                                                                                                                          |
| <u>Vital Signs:</u>                                                                                                                                                                                                                                                                                                                                                                                                                                                                                                                                                                                                                                                                                                                           | HR: _____ bpm<br>RR: _____ rpm<br>Sat: _____ %<br>BP: ____ / ____ mmHg                                                                                                                                       |
| <u>Pain and Sedation Scores:</u><br><b>vNRS</b><br>"On a scale of 0 to 10, where 0 is no pain and 10 is the worst pain you can imagine, what is your pain level now?"<br><b>VAS</b><br>"What is your pain level on this sliding scale, where 0 means absence of pain and 100 is the worst pain you have ever experienced?"<br><b>FPS-R</b><br>"These faces show how much something can hurt. This face (point to left most face) shows no pain. The faces show more and more pain (point from left to right) up to this one (point to right most face) – it shows very much pain. Can you point to the face that shows how much you hurt right now?"<br>Note: say "hurt" or "pain" whichever seems right for a particular child<br><b>RSS</b> | _____/10<br>_____/100 mm<br><input type="checkbox"/> 0 <input type="checkbox"/> 2 <input type="checkbox"/> 4<br><input type="checkbox"/> 6 <input type="checkbox"/> 8 <input type="checkbox"/> 10<br>_____/6 |
| <u>Any adverse events or side effects?</u><br>If "YES", complete a separate entry for each AE on the AE Form. Do not suggest any AEs to the participant; let him/ her answer spontaneously.                                                                                                                                                                                                                                                                                                                                                                                                                                                                                                                                                   | <input type="checkbox"/> Yes – (Fill out Adverse Events Form)<br><input type="checkbox"/> No                                                                                                                 |

## A study of Non-Steroidal Or Opioid Analgesia Use for Children with Musculoskeletal Injuries: The No OUCH Trials

| REB # :            | Study ID                                                         | Enrolment Date                      |
|--------------------|------------------------------------------------------------------|-------------------------------------|
| PI: Dr. Samina Ali | ____ - ____ - ____<br>(site - preference group - patient number) | ____ / ____ / 20____<br>dd mmm yyyy |

## Evaluation # 5 (T90 – 90 minutes after study drugs administration)

Time due: dd/ mmm/ yyyy HH:MM ± 15 min

|                                                                                                                                                                                                                                                                                                                                                                                                                                                                                                                                                                                                                                                                                                                                                           |                                                                                                                                                                                                                          |
|-----------------------------------------------------------------------------------------------------------------------------------------------------------------------------------------------------------------------------------------------------------------------------------------------------------------------------------------------------------------------------------------------------------------------------------------------------------------------------------------------------------------------------------------------------------------------------------------------------------------------------------------------------------------------------------------------------------------------------------------------------------|--------------------------------------------------------------------------------------------------------------------------------------------------------------------------------------------------------------------------|
| Was this evaluation completed?                                                                                                                                                                                                                                                                                                                                                                                                                                                                                                                                                                                                                                                                                                                            | <input type="checkbox"/> Yes <input type="checkbox"/> No                                                                                                                                                                 |
| If Yes, continue. If No, specify reason:                                                                                                                                                                                                                                                                                                                                                                                                                                                                                                                                                                                                                                                                                                                  | <input type="checkbox"/> Patient discharged before specified evaluation time<br><input type="checkbox"/> Other: _____                                                                                                    |
| <u>Date and Time of evaluation # 5:</u>                                                                                                                                                                                                                                                                                                                                                                                                                                                                                                                                                                                                                                                                                                                   | ____ / ____ / ____<br>dd mmm yyyy<br>____ : ____<br>(24 hour clock)                                                                                                                                                      |
| <u>Vital Signs:</u>                                                                                                                                                                                                                                                                                                                                                                                                                                                                                                                                                                                                                                                                                                                                       | HR: _____ bpm<br>RR: _____ rpm<br>Sat: _____ %<br>BP: ____ / ____ mmHg                                                                                                                                                   |
| <u>Pain and Sedation Scores:</u><br><b>vNRS</b><br>"On a scale of 0 to 10, where 0 is no pain and 10 is the worst pain you can imagine, what is your pain level now?"<br><br><b>VAS</b><br>"What is your pain level on this sliding scale, where 0 means absence of pain and 100 is the worst pain you have ever experienced?"<br><br><b>FPS-R</b><br>"These faces show how much something can hurt. This face (point to left most face) shows no pain. The faces show more and more pain (point from left to right) up to this one (point to right most face) – it shows very much pain. Can you point to the face that shows how much you hurt right now?"<br>Note: say "hurt" or "pain" whichever seems right for a particular child<br><br><b>RSS</b> | _____/10<br><br>_____/100 mm<br><br><input type="checkbox"/> 0 <input type="checkbox"/> 2 <input type="checkbox"/> 4<br><input type="checkbox"/> 6 <input type="checkbox"/> 8 <input type="checkbox"/> 10<br><br>_____/6 |
| <u>Any adverse events or side effects?</u><br>If "YES", complete a separate entry for each AE on the AE Form. Do not suggest any AEs to the participant; let him/ her answer spontaneously.                                                                                                                                                                                                                                                                                                                                                                                                                                                                                                                                                               | <input type="checkbox"/> Yes – (Fill out Adverse Events Form)<br><input type="checkbox"/> No                                                                                                                             |

## A study of Non-Steroidal Or Opioid Analgesia Use for Children with Musculoskeletal Injuries: The No OUCH Trials

| REB # :            | Study ID                                                         | Enrolment Date                      |
|--------------------|------------------------------------------------------------------|-------------------------------------|
| PI: Dr. Samina Ali | ____ - ____ - ____<br>(site - preference group - patient number) | ____ / ____ / 20____<br>dd mmm yyyy |

## Evaluation # 6 (T120 – 120 minutes after study drugs administration)

Time due: dd/ mmm/ yyyy HH:MM ± 15 min

|                                                                                                                                                                                                                                                                                                                                                                                                                                                                                                                                                                                                                                                                                                                                                           |                                                                                                                                                                                                                          |
|-----------------------------------------------------------------------------------------------------------------------------------------------------------------------------------------------------------------------------------------------------------------------------------------------------------------------------------------------------------------------------------------------------------------------------------------------------------------------------------------------------------------------------------------------------------------------------------------------------------------------------------------------------------------------------------------------------------------------------------------------------------|--------------------------------------------------------------------------------------------------------------------------------------------------------------------------------------------------------------------------|
| Was this evaluation completed?                                                                                                                                                                                                                                                                                                                                                                                                                                                                                                                                                                                                                                                                                                                            | <input type="checkbox"/> Yes <input type="checkbox"/> No                                                                                                                                                                 |
| If Yes, continue. If No, specify reason:                                                                                                                                                                                                                                                                                                                                                                                                                                                                                                                                                                                                                                                                                                                  | <input type="checkbox"/> Patient discharged before specified evaluation time<br><input type="checkbox"/> Other: _____                                                                                                    |
| <u>Date and Time of evaluation # 6:</u>                                                                                                                                                                                                                                                                                                                                                                                                                                                                                                                                                                                                                                                                                                                   | ____ / ____ / ____<br>dd mmm yyyy<br>____ : ____<br>(24 hour clock)                                                                                                                                                      |
| <u>Vital Signs:</u>                                                                                                                                                                                                                                                                                                                                                                                                                                                                                                                                                                                                                                                                                                                                       | HR: _____ bpm<br>RR: _____ rpm<br>Sat: _____ %<br>BP: ____ / ____ mmHg                                                                                                                                                   |
| <u>Pain and Sedation Scores:</u><br><b>vNRS</b><br>"On a scale of 0 to 10, where 0 is no pain and 10 is the worst pain you can imagine, what is your pain level now?"<br><br><b>VAS</b><br>"What is your pain level on this sliding scale, where 0 means absence of pain and 100 is the worst pain you have ever experienced?"<br><br><b>FPS-R</b><br>"These faces show how much something can hurt. This face (point to left most face) shows no pain. The faces show more and more pain (point from left to right) up to this one (point to right most face) – it shows very much pain. Can you point to the face that shows how much you hurt right now?"<br>Note: say "hurt" or "pain" whichever seems right for a particular child<br><br><b>RSS</b> | _____/10<br><br>_____/100 mm<br><br><input type="checkbox"/> 0 <input type="checkbox"/> 2 <input type="checkbox"/> 4<br><input type="checkbox"/> 6 <input type="checkbox"/> 8 <input type="checkbox"/> 10<br><br>_____/6 |
| <u>Any adverse events or side effects?</u><br>If "YES", complete a separate entry for each AE on the AE Form. Do not suggest any AEs to the participant; let him/ her answer spontaneously.                                                                                                                                                                                                                                                                                                                                                                                                                                                                                                                                                               | <input type="checkbox"/> Yes – (Fill out Adverse Events Form)<br><input type="checkbox"/> No                                                                                                                             |

## A study of Non-Steroidal Or Opioid Analgesia Use for Children with Musculoskeletal Injuries: The No OUCH Trials

| REB # :            | Study ID                                                         | Enrolment Date                      |
|--------------------|------------------------------------------------------------------|-------------------------------------|
| PI: Dr. Samina Ali | ____ - ____ - ____<br>(site - preference group - patient number) | ____ / ____ / 20____<br>dd mmm yyyy |

## Evaluation # 7 (TME, Time of Medical Examination)

|                                                                                                                                                                                                                                                                                                                                                                                                                                                                                                                                                                                                                                                                                                                                               |                                                                                                                                                                                                                          |
|-----------------------------------------------------------------------------------------------------------------------------------------------------------------------------------------------------------------------------------------------------------------------------------------------------------------------------------------------------------------------------------------------------------------------------------------------------------------------------------------------------------------------------------------------------------------------------------------------------------------------------------------------------------------------------------------------------------------------------------------------|--------------------------------------------------------------------------------------------------------------------------------------------------------------------------------------------------------------------------|
| Was this evaluation completed?                                                                                                                                                                                                                                                                                                                                                                                                                                                                                                                                                                                                                                                                                                                | <input type="checkbox"/> Yes <input type="checkbox"/> No                                                                                                                                                                 |
| If Yes, continue. If No, specify reason:                                                                                                                                                                                                                                                                                                                                                                                                                                                                                                                                                                                                                                                                                                      |                                                                                                                                                                                                                          |
| <u>Date and Time of medical exam:</u>                                                                                                                                                                                                                                                                                                                                                                                                                                                                                                                                                                                                                                                                                                         | ____ / ____ / ____<br>dd mmm yyyy<br>____ : ____<br>(24 hour clock)                                                                                                                                                      |
| <u>Vital Signs:</u>                                                                                                                                                                                                                                                                                                                                                                                                                                                                                                                                                                                                                                                                                                                           | HR: _____ bpm<br>RR: _____ rpm<br>Sat: _____ %<br>BP: ____ / ____ mmHg                                                                                                                                                   |
| <u>Pain and Sedation Scores:</u><br><b>vNRS</b><br>"On a scale of 0 to 10, where 0 is no pain and 10 is the worst pain you can imagine, what is your pain level now?"<br><b>VAS</b><br>"What is your pain level on this sliding scale, where 0 means absence of pain and 100 is the worst pain you have ever experienced?"<br><b>FPS-R</b><br>"These faces show how much something can hurt. This face (point to left most face) shows no pain. The faces show more and more pain (point from left to right) up to this one (point to right most face) – it shows very much pain. Can you point to the face that shows how much you hurt right now?"<br>Note: say "hurt" or "pain" whichever seems right for a particular child<br><b>RSS</b> | _____/10<br><br>_____/100 mm<br><br><input type="checkbox"/> 0 <input type="checkbox"/> 2 <input type="checkbox"/> 4<br><input type="checkbox"/> 6 <input type="checkbox"/> 8 <input type="checkbox"/> 10<br><br>_____/6 |
| <u>Any adverse events or side effects?</u><br>If "YES", complete a separate entry for each AE on the AE Form. Do not suggest any AEs to the participant; let him/ her answer spontaneously.                                                                                                                                                                                                                                                                                                                                                                                                                                                                                                                                                   | <input type="checkbox"/> Yes – (Fill out Adverse Events Form)<br><input type="checkbox"/> No                                                                                                                             |

## A study of Non-Steroidal Or Opioid Analgesia Use for Children with Musculoskeletal Injuries: The No OUCH Trials

| REB # :            | Study ID                                                         | Enrolment Date                      |
|--------------------|------------------------------------------------------------------|-------------------------------------|
| PI: Dr. Samina Ali | ____ - ____ - ____<br>(site - preference group - patient number) | ____ / ____ / 20____<br>dd mmm yyyy |

## Evaluation # 8 (TXR – Time following X-Ray procedure +/- 30 minutes)

|                                                                                                                                                                                                                                                                                                                                                                                                   |                                                                                                                                                                       |
|---------------------------------------------------------------------------------------------------------------------------------------------------------------------------------------------------------------------------------------------------------------------------------------------------------------------------------------------------------------------------------------------------|-----------------------------------------------------------------------------------------------------------------------------------------------------------------------|
| Did the patient have an X-ray?                                                                                                                                                                                                                                                                                                                                                                    | <input type="checkbox"/> Yes <input type="checkbox"/> No                                                                                                              |
| If Yes, Was the post- X-ray evaluation completed?                                                                                                                                                                                                                                                                                                                                                 | <input type="checkbox"/> Yes <input type="checkbox"/> No                                                                                                              |
| If Yes, continue. If No, specify reason:                                                                                                                                                                                                                                                                                                                                                          |                                                                                                                                                                       |
| <u>Date and Time of X-ray:</u>                                                                                                                                                                                                                                                                                                                                                                    | ____ / ____ / ____<br>dd mmm yyyy<br>____ : ____<br>(24 hour clock)                                                                                                   |
| <u>Date and Time of evaluation # 8:</u>                                                                                                                                                                                                                                                                                                                                                           | ____ / ____ / ____<br>dd mmm yyyy<br>____ : ____<br>(24 hour clock)                                                                                                   |
| <u>Vital Signs:</u>                                                                                                                                                                                                                                                                                                                                                                               | HR: _____ bpm<br>RR: _____ rpm<br>Sat: _____ %<br>BP: _____ / _____ mmHg                                                                                              |
| <u>Pain and Sedation Scores:</u>                                                                                                                                                                                                                                                                                                                                                                  |                                                                                                                                                                       |
| <b>vNRS</b><br>"On a scale of 0 to 10, where 0 is no pain and 10 is the worst pain you can imagine, what is your pain level now?"                                                                                                                                                                                                                                                                 | _____/10                                                                                                                                                              |
| <b>VAS</b><br>"What is your pain level on this sliding scale, where 0 means absence of pain and 100 is the worst pain you have ever experienced?"                                                                                                                                                                                                                                                 | _____/100 mm                                                                                                                                                          |
| <b>FPS-R</b><br>"These faces show how much something can hurt. This face (point to left most face) shows no pain. The faces show more and more pain (point from left to right) up to this one (point to right most face) – it shows very much pain. Can you point to the face that shows how much you hurt right now?"<br>Note: say "hurt" or "pain" whichever seems right for a particular child | <input type="checkbox"/> 0 <input type="checkbox"/> 2 <input type="checkbox"/> 4<br><input type="checkbox"/> 6 <input type="checkbox"/> 8 <input type="checkbox"/> 10 |
| <b>RSS</b>                                                                                                                                                                                                                                                                                                                                                                                        | _____/6                                                                                                                                                               |

## A study of Non-Steroidal Or Opioid Analgesia Use for Children with Musculoskeletal Injuries: The No OUCH Trials

| REB # :            | Study ID                                                         | Enrolment Date                   |
|--------------------|------------------------------------------------------------------|----------------------------------|
| PI: Dr. Samina Ali | ____ - ____ - ____<br>(site - preference group - patient number) | ___ / ___ / 20___<br>dd mmm yyyy |

|                                                                                                                                                                                                               |                                                                                              |
|---------------------------------------------------------------------------------------------------------------------------------------------------------------------------------------------------------------|----------------------------------------------------------------------------------------------|
| <p><b>Any adverse events or side effects?</b></p> <p><i>If "YES", complete a separate entry for each AE on the AE Form. Do not suggest any AEs to the participant; let him/ her answer spontaneously.</i></p> | <input type="checkbox"/> Yes – (Fill out Adverse Events Form)<br><input type="checkbox"/> No |
|---------------------------------------------------------------------------------------------------------------------------------------------------------------------------------------------------------------|----------------------------------------------------------------------------------------------|

## A study of Non-Steroidal Or Opioid Analgesia Use for Children with Musculoskeletal Injuries: The No OUCH Trials

| REB # :            | Study ID                                                         | Enrolment Date                      |
|--------------------|------------------------------------------------------------------|-------------------------------------|
| PI: Dr. Samina Ali | ____ - ____ - ____<br>(site - preference group - patient number) | ____ / ____ / 20____<br>dd mmm yyyy |

## ED Discharge Evaluation

| ED Discharge Evaluation (To be done <u>only</u> if discharged before 120 minutes)                                                                                                                                                                                                                                                                                                                                                                                                                                                                                                                                                                                                                                                             |                                                                                                                                                                                                                             |
|-----------------------------------------------------------------------------------------------------------------------------------------------------------------------------------------------------------------------------------------------------------------------------------------------------------------------------------------------------------------------------------------------------------------------------------------------------------------------------------------------------------------------------------------------------------------------------------------------------------------------------------------------------------------------------------------------------------------------------------------------|-----------------------------------------------------------------------------------------------------------------------------------------------------------------------------------------------------------------------------|
| Was the patient discharged before 120 minutes?                                                                                                                                                                                                                                                                                                                                                                                                                                                                                                                                                                                                                                                                                                | <input type="checkbox"/> Yes <input type="checkbox"/> No                                                                                                                                                                    |
| If Yes, Was this evaluation completed?                                                                                                                                                                                                                                                                                                                                                                                                                                                                                                                                                                                                                                                                                                        | <input type="checkbox"/> Yes <input type="checkbox"/> No                                                                                                                                                                    |
| If Yes, continue. If No, specify reason:                                                                                                                                                                                                                                                                                                                                                                                                                                                                                                                                                                                                                                                                                                      |                                                                                                                                                                                                                             |
| <u>Date and Time of ED Discharge:</u>                                                                                                                                                                                                                                                                                                                                                                                                                                                                                                                                                                                                                                                                                                         | ____ / ____ / ____<br>dd mmm yyyy<br>____ : ____<br>(24 hour clock)                                                                                                                                                         |
| <u>Vital Signs:</u>                                                                                                                                                                                                                                                                                                                                                                                                                                                                                                                                                                                                                                                                                                                           | HR: _____ bpm<br>RR: _____ rpm<br>Sat: _____ %<br>BP: ____ / ____ mmHg                                                                                                                                                      |
| <u>Pain and Sedation Scores:</u><br><b>vNRS</b><br>"On a scale of 0 to 10, where 0 is no pain and 10 is the worst pain you can imagine, what is your pain level now?"<br><b>VAS</b><br>"What is your pain level on this sliding scale, where 0 means absence of pain and 100 is the worst pain you have ever experienced?"<br><b>FPS-R</b><br>"These faces show how much something can hurt. This face (point to left most face) shows no pain. The faces show more and more pain (point from left to right) up to this one (point to right most face) – it shows very much pain. Can you point to the face that shows how much you hurt right now?"<br>Note: say "hurt" or "pain" whichever seems right for a particular child<br><b>RSS</b> | ____ / 10<br><br>____ / 100 mm<br><br><input type="checkbox"/> 0 <input type="checkbox"/> 2 <input type="checkbox"/> 4<br><input type="checkbox"/> 6 <input type="checkbox"/> 8 <input type="checkbox"/> 10<br><br>____ / 6 |
| <u>Any adverse events or side effects?</u><br>If "YES", complete a separate entry for each AE on the AE Form. Do not suggest any AEs to the participant; let him/ her answer spontaneously.                                                                                                                                                                                                                                                                                                                                                                                                                                                                                                                                                   | <input type="checkbox"/> Yes – (Fill out Adverse Events Form)<br><input type="checkbox"/> No                                                                                                                                |



**A study of Non-Steroidal Or Opioid Analgesia Use for Children with Musculoskeletal Injuries: The No OUCH Trials**

| REB # :            | Study ID                                                         | Enrolment Date                      |
|--------------------|------------------------------------------------------------------|-------------------------------------|
| PI: Dr. Samina Ali | ____ - ____ - ____<br>(site - preference group - patient number) | ____ / ____ / 20____<br>dd mmm yyyy |

|                               |                                                                                                                                                                                                                                                                                     |
|-------------------------------|-------------------------------------------------------------------------------------------------------------------------------------------------------------------------------------------------------------------------------------------------------------------------------------|
| Reason for early termination? | <input type="checkbox"/> Procedural sedation used for a reduction*<br><input type="checkbox"/> Left ED prior to evaluation<br><input type="checkbox"/> Left without being seen<br><input type="checkbox"/> Other, please specify<br>_____<br>* Fill out Concomitant Medication Form |
|-------------------------------|-------------------------------------------------------------------------------------------------------------------------------------------------------------------------------------------------------------------------------------------------------------------------------------|

## A study of Non-Steroidal Or Opioid Analgesia Use for Children with Musculoskeletal Injuries: The No OUCH Trials

| REB # :            | Study ID                                                         | Enrolment Date                      |
|--------------------|------------------------------------------------------------------|-------------------------------------|
| PI: Dr. Samina Ali | ____ - ____ - ____<br>(site - preference group - patient number) | ____ / ____ / 20____<br>dd mmm yyyy |

## PRE-Discharge Questions

| Question for Research Nurse                                                          |                                                                                                                                                            |
|--------------------------------------------------------------------------------------|------------------------------------------------------------------------------------------------------------------------------------------------------------|
| Which drug, or combination of drugs, do you think the child received for this study? | <input type="checkbox"/> Ibuprofen alone or<br><input type="checkbox"/> Ibuprofen + Acetaminophen or<br><input type="checkbox"/> Ibuprofen + Hydromorphone |

| Questions for Parent/ Caregiver                                                                                    |                                                                                                                                                                                                                            |
|--------------------------------------------------------------------------------------------------------------------|----------------------------------------------------------------------------------------------------------------------------------------------------------------------------------------------------------------------------|
| Which drug, or combination of drugs, do you (parent/ caregiver) think your child received for this study?          | <input type="checkbox"/> Ibuprofen alone or<br><input type="checkbox"/> Ibuprofen + Acetaminophen or<br><input type="checkbox"/> Ibuprofen + Hydromorphone                                                                 |
| How do you feel about the pain treatment provided by the study medicine today?                                     | <input type="checkbox"/> Very Satisfied<br><input type="checkbox"/> Somewhat Satisfied<br><input type="checkbox"/> Neutral<br><input type="checkbox"/> Somewhat dissatisfied<br><input type="checkbox"/> Very dissatisfied |
| Do you feel that that the medicines that your child received provided adequate/ enough pain relief for your child? | <input type="checkbox"/> Yes<br><input type="checkbox"/> No<br><input type="checkbox"/> Unsure                                                                                                                             |
| Would you accept the same medicine for your child, in the unlikely event of a similar injury in the future?        | <input type="checkbox"/> Yes<br><input type="checkbox"/> No<br><input type="checkbox"/> Unsure                                                                                                                             |
| Why? Why Not?                                                                                                      | Free Text                                                                                                                                                                                                                  |

| Questions for Child                                                       |                                                                                                                                                                                                  |
|---------------------------------------------------------------------------|--------------------------------------------------------------------------------------------------------------------------------------------------------------------------------------------------|
| How happy were you with the pain treatment from the study medicine today? | <input type="checkbox"/> Very happy<br><input type="checkbox"/> Somewhat happy<br><input type="checkbox"/> Neutral<br><input type="checkbox"/> Somewhat sad<br><input type="checkbox"/> Very sad |
| Would you take the same medicine if you had the same injury again?        | <input type="checkbox"/> Yes<br><input type="checkbox"/> No                                                                                                                                      |

**A study of Non-Steroidal Or Opioid Analgesia Use for Children with Musculoskeletal Injuries: The No OUCH Trials**

| REB # :            | Study ID                                                         | Enrolment Date                   |
|--------------------|------------------------------------------------------------------|----------------------------------|
| PI: Dr. Samina Ali | ____ - ____ - ____<br>(site - preference group - patient number) | ___ / ___ / 20___<br>dd mmm yyyy |

|               |                                 |
|---------------|---------------------------------|
|               | <input type="checkbox"/> Unsure |
| Why? Why Not? | Free Text                       |

## A study of Non-Steroidal Or Opioid Analgesia Use for Children with Musculoskeletal Injuries: The No OUCH Trials

| REB # :            | Study ID                                                                | Enrolment Date                      |
|--------------------|-------------------------------------------------------------------------|-------------------------------------|
| PI: Dr. Samina Ali | ____ - ____ - ____ - ____<br>(site - preference group - patient number) | ____ / ____ / 20____<br>dd mmm yyyy |

## POST-Discharge Questions

| Questions for Treating ED Physician                     |                                                                                                                                                                                                              |
|---------------------------------------------------------|--------------------------------------------------------------------------------------------------------------------------------------------------------------------------------------------------------------|
| Which drug(s) would you have chosen to give this child? | <input type="checkbox"/> Ibuprofen alone or<br><input type="checkbox"/> Ibuprofen + Acetaminophen or<br><input type="checkbox"/> Ibuprofen + Hydromorphone<br><input type="checkbox"/> other, please specify |
| Which drug(s) do you think that the child received?     | <input type="checkbox"/> Ibuprofen alone or<br><input type="checkbox"/> Ibuprofen + Acetaminophen or<br><input type="checkbox"/> Ibuprofen + Hydromorphone                                                   |

| Unblinding                                   |                                                                              |
|----------------------------------------------|------------------------------------------------------------------------------|
| Was the study unblinded during the ED visit? | <input type="checkbox"/> Yes, please explain.<br><input type="checkbox"/> No |

| Co-Interventions                                   |                                                          |                                                          |                             |
|----------------------------------------------------|----------------------------------------------------------|----------------------------------------------------------|-----------------------------|
| Were any interventions done during the ED visit?   |                                                          | <input type="checkbox"/> Yes*                            | <input type="checkbox"/> No |
| <i>* If "YES", please fill out the table below</i> |                                                          |                                                          |                             |
| Intervention                                       | Administered?                                            | Date and Time of Administration<br>(dd/ mmm/ yyyy HH:MM) | Comments                    |
| Reduction of the fracture?                         | <input type="checkbox"/> Yes <input type="checkbox"/> No |                                                          |                             |
| Splint?                                            | <input type="checkbox"/> Yes <input type="checkbox"/> No |                                                          |                             |
| Cast?                                              | <input type="checkbox"/> Yes <input type="checkbox"/> No |                                                          |                             |
| Ice?                                               | <input type="checkbox"/> Yes <input type="checkbox"/> No |                                                          |                             |
| Distraction?                                       | <input type="checkbox"/> Yes <input type="checkbox"/> No |                                                          |                             |
| Other? Please specify:<br>_____                    | <input type="checkbox"/> Yes <input type="checkbox"/> No |                                                          |                             |

If a procedural sedation or a medication has been administered, please fill out the Concomitant Medication Form.

## A study of Non-Steroidal Or Opioid Analgesia Use for Children with Musculoskeletal Injuries: The No OUCH Trials

| REB # :            | Study ID                                                         | Enrolment Date                      |
|--------------------|------------------------------------------------------------------|-------------------------------------|
| PI: Dr. Samina Ali | ____ - ____ - ____<br>(site - preference group - patient number) | ____ / ____ / 20____<br>dd mmm yyyy |

| Discharge Details                                                                           |                                                                                                                        |
|---------------------------------------------------------------------------------------------|------------------------------------------------------------------------------------------------------------------------|
| Discharge Disposition                                                                       | <input type="checkbox"/> Discharged Home<br><input type="checkbox"/> Admitted<br><input type="checkbox"/> Other, _____ |
| Date and Time of Discharge                                                                  | ____ / ____ / ____<br>dd mmm yyyy<br>____ : ____<br>(24 hour clock)                                                    |
| Length of Stay in ED (calculated field):                                                    | ____ (hours, to one decimal place)                                                                                     |
| Final diagnosis at discharge (per MD):                                                      |                                                                                                                        |
| Radiologic Exams:                                                                           | <input type="checkbox"/> Yes<br><input type="checkbox"/> No                                                            |
| If yes, Date and Time of Radiologic Exam:                                                   | ____ / ____ / ____<br>dd mmm yyyy<br>____ : ____<br>(24 hour clock)                                                    |
| Final diagnosis from radiologist's report:<br>(From chart or electronic health care system) |                                                                                                                        |



## A study of Non-Steroidal Or Opioid Analgesia Use for Children with Musculoskeletal Injuries: The No OUCH Trials

| REB # :            | Study ID                                                         | Enrolment Date                   |
|--------------------|------------------------------------------------------------------|----------------------------------|
| PI: Dr. Samina Ali | ____ - ____ - ____<br>(site - preference group - patient number) | ___ / ___ / 20___<br>dd mmm yyyy |

## 24 Hour Follow-up Survey

## Adverse Effects and Side Effects

After you were discharged from the emergency department, has your child experienced any adverse (bad) effects or side effects that you think are related to the pain medicines they got in the study?

- Yes  
 No

If YES, please explain:

## Medication Uses

After you were discharged from the emergency department, has your child taken any other medicines?

- Yes  
 No

If YES, please specify:

## Home Pain Assessment

Please rate your child's **overall** (average) pain experience in the last 24 hours, on a scale from 0-10, where 0=no pain and 10=the worst pain imaginable.

\_\_\_\_\_/10

Please rate your child's **worst** pain experienced in the last 24 hours, on a scale from 0-10, where 0=no pain and 10= the worst pain imaginable.

\_\_\_\_\_/10

## Pain Related Function

Did your child whine or complain more than usual in the last 24 hours?

Yes  No

Did your child play less than usual in the last 24 hours?

Yes  No

Did your child do the things they normally do in the last 24 hours?

Yes  No

Did your child act more quiet than usual in the last 24 hours?

Yes  No

Did your child have less energy than usual in the last 24 hours?

Yes  No

Did your child eat less than usual in the last 24 hours?

Yes  No

Did your child sleep less than usual in the last 24 hours?

Yes  No

## A study of Non-Steroidal Or Opioid Analgesia Use for Children with Musculoskeletal Injuries: The No OUCH Trials

| REB # :            | Study ID                                                         | Enrolment Date                |
|--------------------|------------------------------------------------------------------|-------------------------------|
| PI: Dr. Samina Ali | ____ - ____ - ____<br>(site - preference group - patient number) | __ / __ / 20__<br>dd mmm yyyy |

|                                                                              |                                                          |
|------------------------------------------------------------------------------|----------------------------------------------------------|
| Did your child hold the sore part of the body in the last 24 hours?          | <input type="checkbox"/> Yes <input type="checkbox"/> No |
| Did your child moan or groan more than usual in the last 24 hours?           | <input type="checkbox"/> Yes <input type="checkbox"/> No |
| Did your child want to be close to you more than usual in the last 24 hours? | <input type="checkbox"/> Yes <input type="checkbox"/> No |
| <i>Total PPPM Score (Automatic Calculation – Hidden Field) =</i>             | <b>0 - 10</b>                                            |

| Activity Score                                               |                                                                                                                                        |
|--------------------------------------------------------------|----------------------------------------------------------------------------------------------------------------------------------------|
| Rate your child's ability to perform their usual activities: | <input type="checkbox"/> A No limitation<br><input type="checkbox"/> B Mild limitation<br><input type="checkbox"/> C Severe limitation |

| At-Home Treatments                                                                     |                                                          |
|----------------------------------------------------------------------------------------|----------------------------------------------------------|
| Did your child use any of the following in the last 24 hours to help treat their pain? |                                                          |
| Ice?                                                                                   | <input type="checkbox"/> Yes <input type="checkbox"/> No |
| Elevation (raising their sore body part)?                                              | <input type="checkbox"/> Yes <input type="checkbox"/> No |
| Distraction (such as iPad, movies, games)?                                             | <input type="checkbox"/> Yes <input type="checkbox"/> No |
| Please describe any other things that your child used to help treat the pain.          | Free text                                                |

| Missed School and Work                                       |                                                          |
|--------------------------------------------------------------|----------------------------------------------------------|
| Did your child miss school and/or work in the last 24 hours? | <input type="checkbox"/> Yes <input type="checkbox"/> No |
| Did YOU (caregiver/parent) miss work in the last 24 hours?   | <input type="checkbox"/> Yes <input type="checkbox"/> No |

| What Did Your Child Receive?                                                                                                                                                                                                                                           |
|------------------------------------------------------------------------------------------------------------------------------------------------------------------------------------------------------------------------------------------------------------------------|
| <p>"We would like to let you know that your child received the following as their study drugs:<br/> <b>[Advil only OR Advil and Tylenol OR Advil and Dilaudid].</b></p> <p>We will ask you about your thoughts in this when we email/ call you again in one week."</p> |

|                                                                                                                                                                                                                                                     |
|-----------------------------------------------------------------------------------------------------------------------------------------------------------------------------------------------------------------------------------------------------|
| <p><u>Do you have any other comments or concerns?</u></p>                                                                                                                                                                                           |
| <p>Thank you for completing this follow-up survey, we appreciate your participation in the No OUCH study! Without families like you, our research would not be possible. Your next (and last) follow-up survey will be in approximately 1 week.</p> |



## A study of Non-Steroidal Or Opioid Analgesia Use for Children with Musculoskeletal Injuries: The No OUCH Trials

| REB # :            | Study ID                                                         | Enrolment Date                      |
|--------------------|------------------------------------------------------------------|-------------------------------------|
| PI: Dr. Samina Ali | ____ - ____ - ____<br>(site - preference group - patient number) | ____ / ____ / 20____<br>dd mmm yyyy |

**Follow-up Survey # 2 (1-2 weeks after discharge)**

*Call must be done in this time window*

1 week from discharge: Date: \_\_\_\_ / \_\_\_\_ / \_\_\_\_  
dd mmm yyyy

2 weeks from discharge: Date: \_\_\_\_ / \_\_\_\_ / \_\_\_\_  
dd mmm yyyy

| Follow-up Call Attempts:                                                                                                                                                                                                   |                                        |                |          |
|----------------------------------------------------------------------------------------------------------------------------------------------------------------------------------------------------------------------------|----------------------------------------|----------------|----------|
| Number of call attempts made: <input type="checkbox"/> 1 <input type="checkbox"/> 2 <input type="checkbox"/> 3 <input type="checkbox"/> 4 <input type="checkbox"/> 5<br><input type="checkbox"/> N/A – completed via email |                                        |                |          |
|                                                                                                                                                                                                                            | Date and Time<br>(dd/ mmm/ yyyy HH:MM) | RA<br>Initials | Comments |
| Call # 1:                                                                                                                                                                                                                  | ____ / ____ / ____ ____:____           |                |          |
| Call # 2:                                                                                                                                                                                                                  | ____ / ____ / ____ ____:____           |                |          |
| Call # 3:                                                                                                                                                                                                                  | ____ / ____ / ____ ____:____           |                |          |
| Call # 4:                                                                                                                                                                                                                  | ____ / ____ / ____ ____:____           |                |          |
| Call # 5:                                                                                                                                                                                                                  | ____ / ____ / ____ ____:____           |                |          |
| 1 week Follow-up completed?: <input type="checkbox"/> Yes <input type="checkbox"/> No (Lost to follow-up)                                                                                                                  |                                        |                |          |
| If YES, Continue...                                                                                                                                                                                                        |                                        |                |          |

## A study of Non-Steroidal Or Opioid Analgesia Use for Children with Musculoskeletal Injuries: The No OUCH Trials

| REB # :            | Study ID                                                         | Enrolment Date               |
|--------------------|------------------------------------------------------------------|------------------------------|
| PI: Dr. Samina Ali | ____ - ____ - ____<br>(site - preference group - patient number) | ___/___/20___<br>dd mmm yyyy |

## 1-2 Week Follow-up Survey

| Parent / Caregiver Satisfaction and Comfort Measures                                                                                                                                                                         |                                                                                                                                                                                                                            |
|------------------------------------------------------------------------------------------------------------------------------------------------------------------------------------------------------------------------------|----------------------------------------------------------------------------------------------------------------------------------------------------------------------------------------------------------------------------|
| As you might remember, your child received _XXX_ in the emergency department, as part of this study.<br>Did knowing what pain medicine(s) your child received in the study affect how you treated your child's pain at home? | <input type="checkbox"/> Yes<br><input type="checkbox"/> No<br><input type="checkbox"/> Unsure                                                                                                                             |
| Please explain:                                                                                                                                                                                                              | Free text                                                                                                                                                                                                                  |
| How do you feel about the pain treatment provided by the medicines your child was given in the emergency department, as part of this study?                                                                                  | <input type="checkbox"/> Very Satisfied<br><input type="checkbox"/> Somewhat Satisfied<br><input type="checkbox"/> Neutral<br><input type="checkbox"/> Somewhat dissatisfied<br><input type="checkbox"/> Very dissatisfied |
| Please explain:                                                                                                                                                                                                              | Free text                                                                                                                                                                                                                  |
| Do you feel that that the medicines that your child received in the emergency department, as part of this study provided adequate/ enough pain relief for your child?                                                        | <input type="checkbox"/> Yes<br><input type="checkbox"/> No<br><input type="checkbox"/> Unsure                                                                                                                             |
| Please explain:                                                                                                                                                                                                              | Free text                                                                                                                                                                                                                  |
| Would you accept the same medicine for your child, in the unlikely event of a similar injury in the future?                                                                                                                  | <input type="checkbox"/> Yes<br><input type="checkbox"/> No<br><input type="checkbox"/> Unsure                                                                                                                             |
| Please explain:                                                                                                                                                                                                              | Free text                                                                                                                                                                                                                  |

## A study of Non-Steroidal Or Opioid Analgesia Use for Children with Musculoskeletal Injuries: The No OUCH Trials

| REB # :            | Study ID                                                                | Enrolment Date                   |
|--------------------|-------------------------------------------------------------------------|----------------------------------|
| PI: Dr. Samina Ali | ____ - ____ - ____ - ____<br>(site - preference group - patient number) | ___ / ___ / 20___<br>dd mmm yyyy |

**Since visiting the emergency department, has your child had contact with any of the following health services for any reason related to their injury:**

|                                                                                                                                                                                                  |                                                                                     |
|--------------------------------------------------------------------------------------------------------------------------------------------------------------------------------------------------|-------------------------------------------------------------------------------------|
| A. Family Doctor / General Practitioner?<br>If YES, how many times?                                                                                                                              | <input type="checkbox"/> Yes <input type="checkbox"/> No<br>____ times              |
| B. Orthopedic Specialist?<br>If YES, how many times?                                                                                                                                             | <input type="checkbox"/> Yes <input type="checkbox"/> No<br>____ times              |
| C. Revisit to Emergency Department?<br>If YES, how many times?                                                                                                                                   | <input type="checkbox"/> Yes <input type="checkbox"/> No<br>____ times              |
| D. Other Health Professional (e.g. physiotherapist, chiropractor, naturopath, rehabilitation professional, etc)?<br>If YES, please specify which kind of professional<br>If YES, how many times? | <input type="checkbox"/> Yes <input type="checkbox"/> No<br>Open text<br>____ times |

**For any health care visits related to this injury (including your original visit to the emergency department), has your family:**

|                                                                                                                                                                                                                  |                                                                                                                                                          |
|------------------------------------------------------------------------------------------------------------------------------------------------------------------------------------------------------------------|----------------------------------------------------------------------------------------------------------------------------------------------------------|
| A. Driven yourself or been given a lift in someone else's car?<br>If YES, how many times?<br>If YES, estimated total cost of gas<br>If YES, did you use paid parking?<br>If YES, estimated total cost of parking | <input type="checkbox"/> Yes <input type="checkbox"/> No<br>____ times<br>____ \$<br><input type="checkbox"/> Yes <input type="checkbox"/> No<br>____ \$ |
| B. Used Public Transport (e.g. bus, subway)?<br>If YES, how many times?<br>If YES, estimated total cost of using public transportation                                                                           | <input type="checkbox"/> Yes <input type="checkbox"/> No<br>____ times<br>____ \$                                                                        |
| C. Used Taxi/Uber rides?<br>If YES, how many times?<br>If YES, estimated total cost of using this service                                                                                                        | <input type="checkbox"/> Yes <input type="checkbox"/> No<br>____ times<br>____ \$                                                                        |

## A study of Non-Steroidal Or Opioid Analgesia Use for Children with Musculoskeletal Injuries: The No OUCH Trials

| REB # :            | Study ID                                                         | Enrolment Date                      |
|--------------------|------------------------------------------------------------------|-------------------------------------|
| PI: Dr. Samina Ali | ____ - ____ - ____<br>(site - preference group - patient number) | ____ / ____ / 20____<br>dd mmm yyyy |

| Additional Childcare Expenses                                                                                                                                                     |                                                                                   |
|-----------------------------------------------------------------------------------------------------------------------------------------------------------------------------------|-----------------------------------------------------------------------------------|
| A. Have you needed extra childcare for ANY of your children because of this injury (e.g. emergency department visit, other healthcare visits, child unable to go to school, etc)? | <input type="checkbox"/> Yes <input type="checkbox"/> No                          |
| B. If YES, was it extra <b>unpaid</b> childcare (i.e. grandparents, neighbours)<br>If YES, how many hours?                                                                        | <input type="checkbox"/> Yes <input type="checkbox"/> No<br>____ hours            |
| C. If YES, was it extra <b>paid</b> childcare (i.e. babysitter, daycare)?<br>If YES, how many hours?<br>If YES, estimated total cost of for extra paid childcare                  | <input type="checkbox"/> Yes <input type="checkbox"/> No<br>____ hours<br>____ \$ |

| Since your emergency department visit ~1 week ago:                                                                                                                          |                      |
|-----------------------------------------------------------------------------------------------------------------------------------------------------------------------------|----------------------|
| How many days in total did your child use a pain medication, for injury-related pain?                                                                                       | ____ days            |
| How many days in total did your child miss school and/ or work?                                                                                                             | ____ days            |
| How many days in total did your child not eat properly?                                                                                                                     | ____ days            |
| How many nights in total did your child have disrupted/upset sleep?                                                                                                         | ____ nights          |
| How many days in total was your child unable to participate in their usual activities?                                                                                      | ____ days            |
| How many days in total did YOU (or another caregiver) have to miss work from paid employment because of your child's injury?                                                | ____ days            |
| On a scale of 0 to 10 (where 0 means not at all affected and 10 means extremely affected), how much did this injury affect <u>your child's</u> quality of life?             | 0-10 numerical value |
| On a scale of 0 to 10 (where 0 means not at all affected and 10 means extremely affected), how much did this injury affect <u>your</u> quality of life?                     | 0-10 numerical value |
| <u>Do you have any additional comments or concerns about how this injury and the pain medicines that you used affected you or your child's quality of life?</u>             |                      |
| Thank you for completing this final follow-up survey, we appreciate your participation in the No OUCH study! Without families like you, our research would not be possible. |                      |



## Two Randomized Controlled Trials of Non-Steroidal Or Opioid Analgesia Use for Children with Musculoskeletal Injuries: The No OUCH Study

|                    |                                                                         |                                      |
|--------------------|-------------------------------------------------------------------------|--------------------------------------|
| REB # :            | Study ID                                                                | Enrolment Date                       |
| PI: Dr. Samina Ali | ____ - ____ - ____ - ____<br>(site - preference group - patient number) | ___ / ___ / 20___<br>dd / mmm / yyyy |

## ADVERSE EVENTS FORM

| To be filled out by Research Nurse |                             |                            |                                       |                                                                                                     |                       |                                                   | To be filled out by Site Investigator                                                                                          |                                                                                               |                                          |                                                                                                   |                 |
|------------------------------------|-----------------------------|----------------------------|---------------------------------------|-----------------------------------------------------------------------------------------------------|-----------------------|---------------------------------------------------|--------------------------------------------------------------------------------------------------------------------------------|-----------------------------------------------------------------------------------------------|------------------------------------------|---------------------------------------------------------------------------------------------------|-----------------|
| No.                                | Initial Report or Follow-up | Brief Description of Event | Onset Date & Time (dd/mmm/yyyy HH:MM) | Intensity grade:<br>1. Mild<br>2. Moderate<br>3. Severe<br>4. Life-threatening<br>5. Fatal or Death | Expected AE?<br>Y / N | SAE?<br>Y / N<br><b>If YES, fill out SAE Form</b> | Action Taken<br>1. None<br>2. Medication<br>3. New or Prolonged Hospitalization<br>4. Procedure / Surgery<br>5. Other, specify | Outcome<br>1. Resolved<br>2. Resolved w/ sequelae<br>3. Ongoing<br>4. Death<br>5. Lost to f/u | Date & Time Resolved (dd/mmm/yyyy HH:MM) | Relationship to Study<br>1. Unrelated<br>2. Unlikely<br>3. Possible<br>4. Probable<br>5. Definite | Site PI Initial |
|                                    |                             |                            |                                       |                                                                                                     |                       |                                                   |                                                                                                                                |                                                                                               |                                          |                                                                                                   |                 |
|                                    |                             |                            |                                       |                                                                                                     |                       |                                                   |                                                                                                                                |                                                                                               |                                          |                                                                                                   |                 |
|                                    |                             |                            |                                       |                                                                                                     |                       |                                                   |                                                                                                                                |                                                                                               |                                          |                                                                                                   |                 |

## Two Randomized Controlled Trials of Non-Steroidal Or Opioid Analgesia Use for Children with Musculoskeletal Injuries: The No OUCH Study

| REB # :            | Study ID                                                                | Enrolment Date                |
|--------------------|-------------------------------------------------------------------------|-------------------------------|
| PI: Dr. Samina Ali | ____ - ____ - ____ - ____<br>(site - preference group - patient number) | __ / __ / 20__<br>dd mmm yyyy |

## SERIOUS ADVERSE EVENTS FORM

|                                                                                                                            |                                                                                                                                                                                                                                                                                                          |
|----------------------------------------------------------------------------------------------------------------------------|----------------------------------------------------------------------------------------------------------------------------------------------------------------------------------------------------------------------------------------------------------------------------------------------------------|
| Date and time Site Investigator and Site Research Coordinator were notified:<br><i>(to be completed by Research Nurse)</i> | ____ / ____ / ____ : ____<br>dd mmm yyyy (24 hour clock)                                                                                                                                                                                                                                                 |
| <b>To be completed by site RC / Investigator</b>                                                                           |                                                                                                                                                                                                                                                                                                          |
| Date and time the local REB was notified:                                                                                  | ____ / ____ / ____ : ____<br>dd mmm yyyy (24 hour clock)                                                                                                                                                                                                                                                 |
|                                                                                                                            | <input type="checkbox"/> Not applicable<br><i>Local SAEs must be reported to REB if the event is serious, unexpected, <b>and</b> considered to be related or possibly related to the study. Local SAEs are to be reported to the REB (via email to REB coordinator) within 7 days of their discovery</i> |
| Date and time the lead site Principal Investigator was notified:                                                           | ____ / ____ / ____ : ____<br>dd mmm yyyy (24 hour clock)                                                                                                                                                                                                                                                 |
| Follow up comments:<br><i>(to be completed by site Investigator)</i>                                                       |                                                                                                                                                                                                                                                                                                          |

Signature of Research Nurse: \_\_\_\_\_

Signature of Site Investigator: \_\_\_\_\_

Date: \_\_\_\_ / \_\_\_\_ / \_\_\_\_  
dd mmm yyyyDate: \_\_\_\_ / \_\_\_\_ / \_\_\_\_  
dd mmm yyyy

## Two Randomized Controlled Trials of Non-Steroidal Or Opioid Analgesia Use for Children with Musculoskeletal Injuries: The No OUCH Study

| REB # :            | Study ID                                                         | Enrolment Date                       |
|--------------------|------------------------------------------------------------------|--------------------------------------|
| PI: Dr. Samina Ali | ____ - ____ - ____<br>(site - preference group - patient number) | ___ / ___ / 20___<br>dd / mmm / yyyy |

## PROTOCOL DEVIATION FORM

Did any Protocol Deviations Occur?  Yes  No

| Description of Protocol Deviation | Deviation Category/ Code* | Date Deviation Occurred (dd/mm/yyyy) | Time Deviation Occurred (HH:MM) | Date REB Notified (if applicable) (dd/mm/yyyy) | Date Sponsor Notified (if applicable) (dd/mm/yyyy) | Site PI Initial |
|-----------------------------------|---------------------------|--------------------------------------|---------------------------------|------------------------------------------------|----------------------------------------------------|-----------------|
| 1)                                |                           |                                      |                                 | <input type="checkbox"/> Not applicable        | <input type="checkbox"/> Not applicable            |                 |
| 2)                                |                           |                                      |                                 | <input type="checkbox"/> Not applicable        | <input type="checkbox"/> Not applicable            |                 |
| 3)                                |                           |                                      |                                 | <input type="checkbox"/> Not applicable        | <input type="checkbox"/> Not applicable            |                 |
| 4)                                |                           |                                      |                                 | <input type="checkbox"/> Not applicable        | <input type="checkbox"/> Not applicable            |                 |
| 5)                                |                           |                                      |                                 | <input type="checkbox"/> Not applicable        | <input type="checkbox"/> Not applicable            |                 |

No OUCH CRF

Version June 21, 2019

Page 40 of 44



## Two Randomized Controlled Trials of Non-Steroidal Or Opioid Analgesia Use for Children with Musculoskeletal Injuries: The No OUCH Study

| REB # :            | Study ID                                                         | Enrolment Date                       |
|--------------------|------------------------------------------------------------------|--------------------------------------|
| PI: Dr. Samina Ali | ____ - ____ - ____<br>(site - preference group - patient number) | ___ / ___ / 20___<br>dd / mmm / yyyy |

**\*DEVIATION CATEGORIES / CODES:**Safety (Category A)

1. Not reporting an SAE within 72 hours
2. AE/SAE is not reported to IRB

Informed Consent (Category B)

3. Failure to obtain informed consent
4. Consent form used was not current REB-approved version Consent form missing
5. Consent form missing
6. Consent form not signed and dated by participant
7. Consent form does not contain all required signatures

Eligibility (Category C)

8. Participant did not meet eligibility criterion
9. Randomization of an ineligible participant
10. Participant randomized prior to completing Baseline Assessment, etc.

Protocol implementation (Category D)

11. Failure to keep IRB approval up to date
12. Participant receives wrong treatment
13. Use of unallowable concomitant treatments
14. Prescribed dosing outside protocol guidelines
15. Missed assessment
16. Assessment completed outside of protocol guidelines for timing

Other

17. Other, specify in log

## A study of Non-Steroidal Or Opioid Analgesia Use for Children with Musculoskeletal Injuries: The No OUCH Trials

| REB # :            | Study ID                                                         | Enrolment Date                      |
|--------------------|------------------------------------------------------------------|-------------------------------------|
| PI: Dr. Samina Ali | ____ - ____ - ____<br>(site - preference group - patient number) | ____ / ____ / 20____<br>dd mmm yyyy |

## Unanticipated Problems (UP) Form

|                                                                                                                                                                                                                                                                                 |                                                                                                                                                                                                                                                                                                                                                                                                                                                                                                                                                                                                                                                                                                                         |
|---------------------------------------------------------------------------------------------------------------------------------------------------------------------------------------------------------------------------------------------------------------------------------|-------------------------------------------------------------------------------------------------------------------------------------------------------------------------------------------------------------------------------------------------------------------------------------------------------------------------------------------------------------------------------------------------------------------------------------------------------------------------------------------------------------------------------------------------------------------------------------------------------------------------------------------------------------------------------------------------------------------------|
| Date UP Identified:                                                                                                                                                                                                                                                             | ____ / ____ / ____<br>dd mmm yyyy                                                                                                                                                                                                                                                                                                                                                                                                                                                                                                                                                                                                                                                                                       |
| Identify UP:<br>(Give the UP a brief title)                                                                                                                                                                                                                                     | Open text                                                                                                                                                                                                                                                                                                                                                                                                                                                                                                                                                                                                                                                                                                               |
| The Unanticipated Problem was unexpected in terms of nature, severity or frequency:                                                                                                                                                                                             | <input type="checkbox"/> Yes <input type="checkbox"/> No                                                                                                                                                                                                                                                                                                                                                                                                                                                                                                                                                                                                                                                                |
| The Unanticipated Problem is possibly related to participation in the research:                                                                                                                                                                                                 | <input type="checkbox"/> Yes <input type="checkbox"/> No                                                                                                                                                                                                                                                                                                                                                                                                                                                                                                                                                                                                                                                                |
| The Unanticipated Problem suggests that the research places subjects or others at a greater risk of harm than was previously known or recognized:                                                                                                                               | <input type="checkbox"/> Yes <input type="checkbox"/> No                                                                                                                                                                                                                                                                                                                                                                                                                                                                                                                                                                                                                                                                |
| Briefly Describe the UP:<br>(Include additional or supplementary information as necessary. Include date of incident, date of discovery, describe harm or potential harm that occurred to subject(s), whether the incident is resolved, whether the subject(s) remains on study) | Open text                                                                                                                                                                                                                                                                                                                                                                                                                                                                                                                                                                                                                                                                                                               |
| What action was taken with the study as a result of the Unanticipated Problem?<br><br>(Check all that apply)                                                                                                                                                                    | <input type="checkbox"/> No action<br><input type="checkbox"/> Revise protocol to eliminate apparent immediate hazards to subjects<br><input type="checkbox"/> Modification of inclusion or exclusion criteria to mitigate newly identified risks<br><input type="checkbox"/> Implementation of additional procedures for monitoring subjects<br><input type="checkbox"/> Suspension of enrollment of new subjects<br><input type="checkbox"/> Notify currently enrolled subjects<br><input type="checkbox"/> Suspension of research procedures in currently enrolled subject<br><input type="checkbox"/> Modification of consent documents to include a description of newly recognized risks (site and/or study wide) |

## A study of Non-Steroidal Or Opioid Analgesia Use for Children with Musculoskeletal Injuries: The No OUCH Trials

| REB # :            | Study ID                                                         | Enrolment Date                      |
|--------------------|------------------------------------------------------------------|-------------------------------------|
| PI: Dr. Samina Ali | ____ - ____ - ____<br>(site - preference group - patient number) | ____ / ____ / 20____<br>dd mmm yyyy |

|                                                            |                                                                                                                                                                                                                                                                                     |
|------------------------------------------------------------|-------------------------------------------------------------------------------------------------------------------------------------------------------------------------------------------------------------------------------------------------------------------------------------|
|                                                            | <input type="checkbox"/> Provision of additional information about newly recognized risks to previously enrolled subjects<br><input type="checkbox"/> Other: _____                                                                                                                  |
| Is the Unanticipated Problem a serious adverse event?      | <input type="checkbox"/> Yes <input type="checkbox"/> No<br><i>If the Unanticipated Problem is a serious adverse event, submit this form and make sure that the adverse event form and Serious Adverse Event report have been completed and submitted as per local site policy.</i> |
| Was the Unexpected Problem reported to the sponsor?        | <input type="checkbox"/> Yes <input type="checkbox"/> No                                                                                                                                                                                                                            |
| <b>If YES</b> , Date UP reported to the sponsor:           | ____ / ____ / ____<br>dd mmm yyyy                                                                                                                                                                                                                                                   |
| <b>If NO</b> , why was the UP not reported to the sponsor? | Open text                                                                                                                                                                                                                                                                           |
| Was the Unexpected Problem reported to the local REB?      | <input type="checkbox"/> Yes <input type="checkbox"/> No                                                                                                                                                                                                                            |
| <b>If YES</b> , Date UP reported to the REB:               | ____ / ____ / ____<br>dd mmm yyyy                                                                                                                                                                                                                                                   |
| <b>If NO</b> , why was the UP not reported to the REB?     | Open text                                                                                                                                                                                                                                                                           |

## A study of Non-Steroidal Or Opioid Analgesia Use for Children with Musculoskeletal Injuries: The No OUCH Trials

| REB # :            | Study ID                                                         | Enrolment Date                      |
|--------------------|------------------------------------------------------------------|-------------------------------------|
| PI: Dr. Samina Ali | ____ - ____ - ____<br>(site - preference group - patient number) | ____ / ____ / 20____<br>dd mmm yyyy |

## Early Withdrawal Form

|                                                                                                                                                                      |                                                                                                                                                                                                                                                                            |
|----------------------------------------------------------------------------------------------------------------------------------------------------------------------|----------------------------------------------------------------------------------------------------------------------------------------------------------------------------------------------------------------------------------------------------------------------------|
| Did participant withdraw from the study?                                                                                                                             | <input type="checkbox"/> Yes <input type="checkbox"/> No                                                                                                                                                                                                                   |
| <b><u>If YES:</u></b> Date of Discontinuation:                                                                                                                       | ____ / ____ / ____<br>dd mmm yyyy                                                                                                                                                                                                                                          |
| Reasons for Discontinuation:                                                                                                                                         | <input type="checkbox"/> Adverse Event / Serious Adverse Event<br><input type="checkbox"/> Death<br><input type="checkbox"/> Withdrawal of Consent / Assent<br><input type="checkbox"/> Protocol Violation, Specify _____<br><input type="checkbox"/> Other, Specify _____ |
| <b><u>If withdrew consent / assent:</u></b><br>1. Permission to use collected data?<br>2. Permission to conduct Chart Review?<br>3. Telephone follow up to continue? | <input type="checkbox"/> Yes <input type="checkbox"/> No<br><input type="checkbox"/> Yes <input type="checkbox"/> No<br><input type="checkbox"/> Yes <input type="checkbox"/> No                                                                                           |
| <u>Comments:</u>                                                                                                                                                     |                                                                                                                                                                                                                                                                            |
